# Supplementary material for: Low-energy vibrational spectra of flexible diphenyl molecules: biphenyl, diphenylmethane, bibenzyl and 2-, 3- and 4-phenyltoluene
Source: Royal Society of Chemistry journal article supplement (doi:10.1039/c4cp03278k), 2014-01-01
Supplement: c4cp03278k1.log [file c4cp03278k1.log]

Harmonic frequencies (cm**-1), IR intensities (KM/Mole), Raman scattering
 activities (A**4/AMU), depolarization ratios for plane and unpolarized
 incident light, reduced masses (AMU), force constants (mDyne/A),
 and normal coordinates:
                     1                      2                      3
                     A                      A                      A
 Frequencies --    42.8055                86.8385               102.7197
 Red. masses --     3.5203                 4.1166                 3.9611
 Frc consts  --     0.0038                 0.0183                 0.0246
 IR Inten    --     0.0461                 0.4513                 0.1349
  Atom  AN      X      Y      Z        X      Y      Z        X      Y      Z
     1   6    -0.01  -0.04   0.00     0.01   0.09   0.19     0.02   0.19   0.03
     2   6    -0.02   0.11   0.15    -0.05   0.06   0.10     0.10   0.12   0.04
     3   6    -0.02   0.13   0.15    -0.05  -0.01  -0.08     0.10  -0.05   0.01
     4   1    -0.02   0.21   0.25    -0.10   0.09   0.17     0.17   0.20   0.06
     5   6     0.00  -0.16  -0.14     0.07   0.04   0.08    -0.07   0.07  -0.02
     6   1    -0.01  -0.05  -0.01     0.01   0.16   0.33     0.02   0.33   0.07
     7   6     0.00  -0.13  -0.13     0.07  -0.03  -0.10    -0.07  -0.09  -0.04
     8   1     0.01  -0.27  -0.25     0.12   0.05   0.14    -0.14   0.11  -0.03
     9   6     0.00   0.01   0.02     0.01  -0.04  -0.16     0.01  -0.14   0.00
    10   1    -0.03   0.24   0.25    -0.11  -0.02  -0.13     0.17  -0.09   0.03
    11   1     0.00  -0.22  -0.22     0.12  -0.05  -0.16    -0.15  -0.17  -0.05
    12   6    -0.01   0.02   0.02     0.01  -0.02  -0.17     0.01  -0.12   0.04
    13   6    -0.01  -0.01   0.11     0.05   0.00  -0.15     0.10  -0.09   0.10
    14   6     0.01   0.03  -0.07    -0.03  -0.02  -0.05    -0.07  -0.05  -0.02
    15   6    -0.02  -0.03   0.12     0.05   0.00   0.04     0.11   0.03   0.04
    16   1    -0.02  -0.02   0.17     0.08   0.00  -0.25     0.16  -0.16   0.16
    17   6     0.01   0.01  -0.06    -0.03  -0.02   0.16    -0.06   0.08  -0.10
    18   6     0.00  -0.02   0.03     0.02  -0.02   0.22     0.03   0.12  -0.09
    19   1    -0.03  -0.06   0.19     0.09   0.01   0.07     0.18   0.06   0.07
    20   6     0.06   0.08  -0.17    -0.09  -0.03  -0.11    -0.16  -0.10   0.01
    21   1    -0.03   0.16  -0.28    -0.12  -0.03  -0.17    -0.17  -0.18   0.00
    22   1     0.22   0.09  -0.22    -0.05  -0.06  -0.15    -0.18  -0.07   0.04
    23   1     0.03   0.03  -0.08    -0.14   0.01  -0.09    -0.21  -0.08   0.05
    24   1     0.02   0.02  -0.13    -0.06  -0.03   0.28    -0.13   0.15  -0.18
    25   1     0.00  -0.04   0.04     0.02  -0.02   0.40     0.03   0.22  -0.16
                     4                      5                      6
                     A                      A                      A
 Frequencies --   131.4217               194.4406               264.3450
 Red. masses --     1.0485                 3.0321                 3.9128
 Frc consts  --     0.0107                 0.0675                 0.1611
 IR Inten    --     0.2522                 1.6435                 0.2979
  Atom  AN      X      Y      Z        X      Y      Z        X      Y      Z
     1   6     0.00   0.00   0.00     0.00   0.01  -0.05     0.12  -0.09  -0.10
     2   6     0.00  -0.01  -0.01     0.06   0.01   0.01     0.10   0.05   0.02
     3   6     0.00  -0.02   0.00     0.06  -0.02   0.09     0.09   0.14   0.11
     4   1     0.01  -0.02  -0.02     0.12   0.03  -0.02     0.08   0.03   0.02
     5   6    -0.01   0.01   0.02    -0.07   0.00  -0.01     0.11   0.01   0.01
     6   1     0.00   0.00   0.00     0.00   0.03  -0.12     0.12  -0.24  -0.25
     7   6    -0.01   0.00   0.02    -0.06  -0.03   0.08     0.11   0.11   0.12
     8   1    -0.01   0.03   0.03    -0.12   0.00  -0.05     0.10  -0.02  -0.03
     9   6     0.00  -0.01   0.01     0.00  -0.04   0.11     0.06   0.08   0.06
    10   1     0.01  -0.02   0.00     0.11  -0.04   0.12     0.11   0.19   0.17
    11   1    -0.01   0.01   0.03    -0.12  -0.05   0.10     0.14   0.17   0.15
    12   6     0.00   0.00   0.01     0.00  -0.04   0.09     0.00  -0.02  -0.06
    13   6     0.00   0.00  -0.01     0.02   0.01  -0.09    -0.06  -0.04  -0.07
    14   6    -0.01  -0.01   0.02    -0.01  -0.03   0.08    -0.05  -0.01  -0.08
    15   6     0.00   0.01  -0.03     0.02   0.06  -0.18    -0.06  -0.05   0.01
    16   1     0.00   0.00  -0.02     0.02   0.03  -0.17    -0.08  -0.02  -0.08
    17   6     0.00   0.00   0.01    -0.01  -0.03   0.16    -0.06   0.00  -0.04
    18   6     0.00   0.01  -0.01     0.01   0.01   0.02    -0.08  -0.04   0.04
    19   1     0.00   0.02  -0.05     0.03   0.11  -0.37    -0.04  -0.05   0.06
    20   6     0.01   0.01  -0.01    -0.01   0.05  -0.21    -0.24  -0.11  -0.03
    21   1    -0.31   0.04  -0.49     0.02   0.22  -0.14    -0.28  -0.29  -0.12
    22   1     0.56   0.22  -0.06    -0.06  -0.21  -0.36    -0.25  -0.07  -0.01
    23   1    -0.18  -0.21   0.46     0.01   0.22  -0.43    -0.38  -0.05   0.08
    24   1    -0.01   0.00   0.02    -0.02  -0.04   0.23    -0.04  -0.01  -0.04
    25   1     0.00   0.01  -0.02     0.01   0.02   0.02    -0.08  -0.06   0.12
                     7                      8                      9
                     A                      A                      A
 Frequencies --   293.8424               327.7659               406.2645
 Red. masses --     4.7224                 3.7682                 3.0544
 Frc consts  --     0.2402                 0.2385                 0.2970
 IR Inten    --     0.4645                 0.7078                 0.9115
  Atom  AN      X      Y      Z        X      Y      Z        X      Y      Z
     1   6     0.16   0.07   0.11    -0.06  -0.05   0.00    -0.05   0.07   0.06
     2   6     0.11  -0.02  -0.03    -0.12   0.02   0.02    -0.02   0.01   0.03
     3   6     0.10  -0.07  -0.14    -0.10   0.11  -0.05    -0.02  -0.11  -0.06
     4   1     0.06  -0.03  -0.01    -0.18   0.02   0.07     0.01   0.03   0.03
     5   6     0.15  -0.05  -0.01     0.03   0.02  -0.01    -0.05  -0.08  -0.10
     6   1     0.17   0.19   0.26    -0.06  -0.14   0.01    -0.05   0.15   0.13
     7   6     0.13  -0.10  -0.11     0.03   0.13  -0.06    -0.04   0.01   0.02
     8   1     0.15  -0.05  -0.01     0.12  -0.03   0.02    -0.05  -0.19  -0.22
     9   6     0.05   0.00  -0.05     0.00   0.11  -0.10     0.02   0.05   0.09
    10   1     0.12  -0.13  -0.19    -0.20   0.18  -0.07    -0.03  -0.23  -0.19
    11   1     0.19  -0.12  -0.18     0.08   0.18  -0.05    -0.07  -0.01   0.03
    12   6    -0.02   0.06   0.11     0.03  -0.04   0.05     0.06   0.09   0.08
    13   6    -0.15   0.01   0.13     0.05  -0.07   0.19    -0.02   0.10  -0.04
    14   6    -0.05   0.06   0.13     0.06  -0.09   0.13     0.14   0.06   0.01
    15   6    -0.18  -0.03  -0.05     0.06   0.01  -0.04    -0.03  -0.01   0.00
    16   1    -0.23   0.06   0.18     0.08  -0.12   0.29    -0.08   0.16  -0.11
    17   6    -0.07  -0.02   0.08     0.06  -0.05   0.13     0.16   0.01  -0.07
    18   6    -0.16  -0.03  -0.10     0.08   0.03  -0.15     0.07  -0.08   0.04
    19   1    -0.21  -0.01  -0.15     0.06   0.03  -0.14    -0.12  -0.05   0.00
    20   6    -0.07   0.10  -0.01    -0.09  -0.11  -0.07    -0.14  -0.06  -0.02
    21   1    -0.08   0.17  -0.01    -0.13  -0.12  -0.14    -0.19  -0.34  -0.15
    22   1    -0.06  -0.01  -0.08    -0.07  -0.28  -0.18    -0.20  -0.13  -0.04
    23   1    -0.08   0.17  -0.07    -0.20   0.05  -0.09    -0.38   0.13   0.09
    24   1     0.01  -0.07   0.07     0.04  -0.05   0.18     0.22  -0.01  -0.16
    25   1    -0.16  -0.03  -0.26     0.08   0.08  -0.39     0.06  -0.20   0.07
                    10                     11                     12
                     A                      A                      A
 Frequencies --   412.6881               462.9628               519.9318
 Red. masses --     2.9396                 2.9410                 3.8990
 Frc consts  --     0.2950                 0.3714                 0.6210
 IR Inten    --     0.3843                 5.2431                 4.4252
  Atom  AN      X      Y      Z        X      Y      Z        X      Y      Z
     1   6     0.02  -0.02  -0.02    -0.02   0.01  -0.01     0.06   0.09   0.12
     2   6     0.01   0.15   0.15     0.01  -0.01   0.00     0.00  -0.05  -0.09
     3   6     0.01  -0.12  -0.14     0.01  -0.03   0.03     0.00   0.06  -0.04
     4   1     0.00   0.32   0.33     0.04   0.00  -0.02    -0.06  -0.24  -0.24
     5   6     0.01  -0.13  -0.12    -0.03   0.00   0.00     0.04  -0.09  -0.06
     6   1     0.02  -0.05  -0.05    -0.02   0.03  -0.01     0.06   0.12   0.18
     7   6     0.01   0.15   0.16    -0.02  -0.03   0.02     0.02   0.03  -0.01
     8   1     0.00  -0.27  -0.27    -0.05   0.01  -0.01     0.04  -0.25  -0.23
     9   6    -0.01  -0.02  -0.03     0.01  -0.02   0.03    -0.04   0.18   0.14
    10   1     0.01  -0.27  -0.29     0.03  -0.05   0.03     0.00  -0.08  -0.18
    11   1     0.03   0.33   0.34    -0.06  -0.05   0.03     0.08  -0.09  -0.18
    12   6    -0.02  -0.03  -0.03     0.01   0.05  -0.10    -0.08  -0.08   0.07
    13   6     0.01  -0.03   0.01     0.00  -0.01   0.18    -0.07  -0.05   0.02
    14   6    -0.05  -0.01  -0.01     0.03   0.10  -0.27    -0.02  -0.14  -0.10
    15   6     0.01   0.00   0.00    -0.01   0.03  -0.14    -0.04   0.15  -0.04
    16   1     0.02  -0.06   0.05    -0.02  -0.08   0.49     0.04  -0.12   0.00
    17   6    -0.06   0.00   0.02     0.03  -0.04   0.13    -0.03   0.06  -0.02
    18   6    -0.03   0.03  -0.01     0.01  -0.02   0.01     0.00   0.09   0.11
    19   1     0.04   0.02   0.01    -0.04   0.04  -0.22     0.02   0.20  -0.12
    20   6     0.06   0.03   0.01    -0.02   0.01   0.02     0.12  -0.19  -0.05
    21   1     0.07   0.13   0.05     0.04  -0.25   0.06     0.14  -0.12   0.00
    22   1     0.09   0.06   0.03    -0.15   0.25   0.21     0.14  -0.10   0.01
    23   1     0.15  -0.06  -0.01    -0.03  -0.10   0.14     0.21  -0.31  -0.04
    24   1    -0.08   0.00   0.06     0.05  -0.15   0.48    -0.17   0.15   0.00
    25   1    -0.02   0.07  -0.01     0.01  -0.08   0.12    -0.01   0.04   0.20
                    13                     14                     15
                     A                      A                      A
 Frequencies --   554.1152               570.0805               626.9778
 Red. masses --     4.3115                 3.6003                 6.6018
 Frc consts  --     0.7800                 0.6894                 1.5290
 IR Inten    --     1.4161                 3.1607                 2.9949
  Atom  AN      X      Y      Z        X      Y      Z        X      Y      Z
     1   6     0.04   0.01  -0.04    -0.03   0.11   0.10     0.17   0.06  -0.07
     2   6     0.04   0.03  -0.01    -0.02  -0.07  -0.08    -0.17   0.20  -0.19
     3   6     0.02  -0.05   0.04    -0.02   0.01   0.07    -0.18  -0.02   0.02
     4   1     0.07   0.07   0.01     0.02  -0.28  -0.32    -0.21   0.21  -0.15
     5   6    -0.02   0.00   0.02     0.00  -0.05  -0.10     0.18   0.04  -0.04
     6   1     0.04   0.01  -0.06    -0.03   0.10   0.11     0.17  -0.13   0.15
     7   6    -0.01  -0.09   0.07     0.01   0.04   0.05     0.14  -0.19   0.17
     8   1    -0.10   0.06   0.01     0.00  -0.26  -0.32    -0.06   0.16  -0.11
     9   6    -0.04  -0.07   0.02     0.03   0.13   0.16    -0.17  -0.07   0.07
    10   1     0.10  -0.08   0.09    -0.03  -0.16  -0.10     0.05  -0.10   0.13
    11   1    -0.03  -0.09   0.09    -0.03  -0.15  -0.11     0.18  -0.16   0.17
    12   6    -0.05   0.09  -0.22     0.04   0.01  -0.15    -0.16   0.07   0.04
    13   6    -0.12   0.09  -0.06     0.09  -0.05  -0.08     0.08   0.18   0.07
    14   6     0.08  -0.07   0.03    -0.07   0.03   0.02    -0.09  -0.03   0.01
    15   6    -0.12   0.11   0.20     0.10  -0.14   0.08     0.09   0.02  -0.02
    16   1    -0.08   0.03   0.07     0.07  -0.06   0.04     0.15   0.14   0.04
    17   6     0.09   0.04   0.15    -0.08  -0.08   0.08    -0.06  -0.17  -0.07
    18   6     0.01   0.11  -0.17    -0.01   0.00  -0.14     0.18  -0.09   0.01
    19   1    -0.15   0.03   0.48     0.14  -0.18   0.29    -0.14  -0.07  -0.09
    20   6     0.07  -0.15  -0.05    -0.05   0.11   0.02    -0.03   0.00   0.00
    21   1     0.04  -0.14  -0.09    -0.06   0.20   0.02    -0.04   0.01   0.00
    22   1     0.08  -0.25  -0.12     0.00   0.09   0.00    -0.03  -0.01  -0.01
    23   1     0.01  -0.06  -0.08     0.00   0.08   0.00    -0.03   0.00   0.00
    24   1     0.03   0.03   0.32    -0.04  -0.14   0.20    -0.13  -0.11  -0.10
    25   1     0.00  -0.01  -0.36     0.00   0.15  -0.19     0.19   0.03   0.05
                    16                     17                     18
                     A                      A                      A
 Frequencies --   631.4706               712.9905               724.8948
 Red. masses --     6.4921                 1.7111                 4.8890
 Frc consts  --     1.5252                 0.5125                 1.5136
 IR Inten    --     2.7555                40.4086                 2.4618
  Atom  AN      X      Y      Z        X      Y      Z        X      Y      Z
     1   6    -0.15   0.07  -0.08    -0.01  -0.05  -0.05    -0.18  -0.02  -0.02
     2   6    -0.19   0.06  -0.04     0.00   0.09   0.10     0.06  -0.13   0.11
     3   6    -0.16  -0.19   0.17     0.00  -0.05  -0.05     0.06  -0.12   0.09
     4   1     0.05   0.18  -0.12     0.00  -0.15  -0.15     0.28   0.07   0.15
     5   6     0.19   0.21  -0.19     0.00   0.10   0.10     0.06   0.11  -0.12
     6   1    -0.16  -0.16   0.14    -0.01  -0.41  -0.42    -0.17   0.11   0.10
     7   6     0.19  -0.04   0.02     0.00  -0.04  -0.06     0.06   0.10  -0.12
     8   1     0.21   0.22  -0.15     0.01  -0.14  -0.15     0.27   0.14   0.08
     9   6     0.15  -0.08   0.07     0.01   0.07   0.07     0.14   0.01   0.01
    10   1    -0.17  -0.18   0.16    -0.01  -0.35  -0.36    -0.07   0.00   0.12
    11   1    -0.03  -0.13   0.12    -0.01  -0.34  -0.36    -0.07   0.14   0.02
    12   6     0.14  -0.07   0.00     0.00   0.00   0.00    -0.04   0.10   0.06
    13   6    -0.07  -0.18  -0.01     0.01   0.01   0.00     0.05   0.25   0.04
    14   6     0.07   0.01   0.03    -0.01   0.00   0.00    -0.11  -0.04  -0.04
    15   6    -0.08   0.00  -0.03     0.01   0.00   0.00     0.00   0.04   0.03
    16   1    -0.13  -0.13  -0.01     0.01   0.00   0.00     0.01   0.28   0.02
    17   6     0.05   0.17   0.01    -0.01  -0.01   0.00    -0.19  -0.16  -0.03
    18   6    -0.18   0.07   0.06     0.01   0.00   0.00     0.04  -0.02  -0.03
    19   1     0.13   0.11  -0.07     0.00  -0.01   0.01    -0.21  -0.06   0.05
    20   6     0.04  -0.01   0.00     0.00   0.00   0.00     0.04  -0.14  -0.04
    21   1     0.04   0.01   0.00     0.00   0.01   0.00     0.05  -0.07  -0.01
    22   1     0.06  -0.04  -0.02     0.01   0.00   0.00     0.07  -0.10  -0.02
    23   1     0.05  -0.01  -0.01     0.01  -0.01   0.00     0.13  -0.23  -0.06
    24   1     0.10   0.14  -0.06    -0.02  -0.01   0.01    -0.28  -0.12   0.05
    25   1    -0.19  -0.04   0.04     0.01   0.01   0.01     0.05   0.14   0.05
                    19                     20                     21
                     A                      A                      A
 Frequencies --   737.9079               759.9001               787.4611
 Red. masses --     2.5085                 1.4949                 1.9825
 Frc consts  --     0.8048                 0.5086                 0.7243
 IR Inten    --     7.0835                65.7945                13.5071
  Atom  AN      X      Y      Z        X      Y      Z        X      Y      Z
     1   6     0.01  -0.03  -0.02    -0.01   0.05   0.05     0.01  -0.07  -0.07
     2   6    -0.03   0.02  -0.01     0.02  -0.02   0.01     0.01   0.00   0.00
     3   6    -0.02   0.00  -0.04     0.01   0.02   0.06     0.00  -0.04  -0.05
     4   1    -0.05   0.11   0.10     0.05  -0.21  -0.21     0.01   0.28   0.29
     5   6     0.01   0.01   0.01     0.00   0.00  -0.02    -0.02  -0.01   0.02
     6   1     0.01   0.04   0.09    -0.02  -0.15  -0.19     0.01   0.31   0.28
     7   6     0.01  -0.02  -0.02     0.00   0.04   0.04    -0.01  -0.05  -0.04
     8   1     0.01   0.10   0.09     0.00  -0.20  -0.21    -0.03   0.27   0.30
     9   6    -0.01   0.02   0.03     0.01  -0.07  -0.07     0.00   0.13   0.13
    10   1    -0.01   0.05   0.01     0.00  -0.05  -0.02     0.01  -0.01   0.00
    11   1     0.02   0.03   0.02    -0.01  -0.03  -0.02    -0.01  -0.02   0.00
    12   6     0.00  -0.06   0.19    -0.01   0.02  -0.08     0.01   0.04  -0.14
    13   6     0.00  -0.02  -0.08    -0.01   0.01   0.06     0.01  -0.03   0.04
    14   6     0.01   0.04  -0.18     0.00   0.00   0.01     0.00  -0.01   0.04
    15   6     0.01  -0.04   0.15    -0.02   0.02   0.04     0.02  -0.03   0.00
    16   1     0.00   0.11  -0.58     0.00   0.08  -0.23     0.01  -0.01   0.01
    17   6     0.01  -0.02   0.13     0.01  -0.02   0.02    -0.02   0.00   0.01
    18   6    -0.01   0.03  -0.07     0.02  -0.03   0.08    -0.01  -0.01   0.08
    19   1     0.04   0.07  -0.24    -0.06   0.14  -0.50     0.05   0.07  -0.35
    20   6     0.00   0.01  -0.03     0.00   0.00   0.00     0.00  -0.01   0.01
    21   1     0.08  -0.18   0.04     0.01  -0.02   0.01    -0.01   0.03   0.00
    22   1    -0.11   0.26   0.16    -0.02   0.03   0.02     0.02  -0.04  -0.02
    23   1     0.03  -0.12   0.08    -0.01  -0.01   0.02     0.00   0.00  -0.01
    24   1     0.01   0.00   0.04     0.00   0.10  -0.38    -0.01   0.09  -0.34
    25   1    -0.01   0.12  -0.46     0.02   0.09  -0.47    -0.01   0.14  -0.36
                    22                     23                     24
                     A                      A                      A
 Frequencies --   814.7004               855.7656               878.3499
 Red. masses --     4.6464                 1.2457                 1.3155
 Frc consts  --     1.8171                 0.5375                 0.5980
 IR Inten    --     0.5482                 0.1464                 0.1463
  Atom  AN      X      Y      Z        X      Y      Z        X      Y      Z
     1   6    -0.06  -0.02  -0.02     0.00   0.00   0.00     0.00  -0.01  -0.01
     2   6     0.04  -0.06   0.05     0.00  -0.05  -0.05     0.00   0.00   0.00
     3   6     0.03  -0.05   0.03     0.00  -0.05  -0.05     0.00   0.00   0.01
     4   1     0.13   0.05   0.09     0.01   0.34   0.35     0.01   0.01   0.00
     5   6     0.06   0.05  -0.06     0.00   0.05   0.05    -0.01  -0.01   0.00
     6   1    -0.05   0.09   0.12     0.00   0.00  -0.01     0.00   0.05   0.04
     7   6     0.03   0.04  -0.06     0.00   0.05   0.05     0.00   0.00   0.01
     8   1     0.16   0.10   0.07     0.00  -0.34  -0.35    -0.01   0.03   0.03
     9   6     0.00   0.04   0.04     0.00   0.00   0.00     0.00   0.01   0.00
    10   1     0.00  -0.07  -0.01     0.01   0.35   0.36     0.00  -0.04  -0.04
    11   1     0.01   0.04  -0.04     0.00  -0.34  -0.36     0.01  -0.03  -0.02
    12   6    -0.12  -0.13  -0.03     0.00   0.00   0.00     0.00   0.01  -0.04
    13   6    -0.15  -0.14  -0.04     0.00   0.00   0.00     0.00  -0.02   0.09
    14   6    -0.04  -0.08  -0.01     0.00   0.00   0.00     0.00   0.00   0.02
    15   6    -0.09   0.20   0.04     0.00   0.00   0.00     0.00  -0.02   0.06
    16   1     0.09  -0.31  -0.05     0.01   0.00  -0.01     0.00   0.14  -0.53
    17   6     0.10  -0.08  -0.02     0.00   0.00   0.00     0.00   0.03  -0.10
    18   6     0.30  -0.03  -0.02     0.00   0.00   0.00     0.00   0.01  -0.04
    19   1    -0.18   0.13   0.10     0.00   0.00   0.00     0.00   0.10  -0.41
    20   6    -0.12   0.21   0.05     0.00   0.00   0.00     0.00  -0.01   0.02
    21   1    -0.10   0.33   0.11     0.00   0.01   0.01    -0.04   0.08  -0.02
    22   1    -0.08   0.27   0.08     0.00   0.01   0.00     0.06  -0.10  -0.06
    23   1    -0.04   0.13   0.04     0.00   0.00   0.00    -0.01   0.06  -0.04
    24   1    -0.05   0.03   0.01     0.00   0.00   0.01     0.00  -0.16   0.60
    25   1     0.28  -0.28  -0.02     0.00  -0.01   0.01     0.00  -0.07   0.27
                    25                     26                     27
                     A                      A                      A
 Frequencies --   927.5167               953.0433               977.2016
 Red. masses --     1.4140                 1.3746                 1.3617
 Frc consts  --     0.7167                 0.7356                 0.7662
 IR Inten    --     2.1020                 0.5925                 0.3431
  Atom  AN      X      Y      Z        X      Y      Z        X      Y      Z
     1   6     0.00  -0.07  -0.07     0.00  -0.01  -0.01     0.00   0.00   0.00
     2   6     0.00   0.00  -0.01     0.00   0.00   0.00     0.00  -0.07  -0.06
     3   6     0.00   0.07   0.07     0.00   0.02   0.01     0.00   0.07   0.06
     4   1     0.00   0.03   0.02    -0.01   0.00   0.01     0.00   0.35   0.36
     5   6     0.00   0.00   0.00     0.01   0.01   0.00     0.00   0.06   0.06
     6   1     0.01   0.39   0.41     0.00   0.04   0.07     0.00   0.00  -0.01
     7   6     0.00   0.07   0.07     0.00   0.02   0.00     0.00  -0.07  -0.06
     8   1     0.00   0.02   0.02     0.02  -0.02  -0.02    -0.01  -0.34  -0.35
     9   6     0.00  -0.05  -0.05     0.00  -0.02  -0.01     0.00   0.00   0.00
    10   1    -0.01  -0.38  -0.39     0.00  -0.06  -0.06    -0.01  -0.34  -0.35
    11   1     0.00  -0.39  -0.40    -0.01  -0.04  -0.06     0.00   0.33   0.35
    12   6     0.00  -0.01   0.02     0.00  -0.01   0.04     0.00   0.00   0.00
    13   6     0.01   0.02   0.01     0.00   0.03  -0.11     0.00   0.00   0.00
    14   6     0.00   0.01   0.00     0.00   0.00  -0.01     0.00   0.00   0.00
    15   6    -0.01   0.01  -0.01     0.00  -0.01   0.06     0.00   0.00   0.00
    16   1     0.01   0.03  -0.05     0.00  -0.15   0.59     0.00   0.00  -0.01
    17   6     0.00   0.00   0.02     0.00   0.03  -0.08     0.00   0.00   0.00
    18   6    -0.01   0.00  -0.01     0.00  -0.02   0.07     0.00   0.00   0.00
    19   1    -0.02  -0.03   0.10    -0.01   0.08  -0.31     0.01   0.00  -0.01
    20   6     0.01   0.00  -0.01     0.00   0.00   0.02     0.01   0.00   0.00
    21   1     0.01  -0.05  -0.01    -0.03   0.07  -0.02     0.00  -0.02  -0.02
    22   1    -0.02   0.01   0.01     0.04  -0.08  -0.05    -0.01  -0.02   0.00
    23   1    -0.01   0.00   0.02     0.00   0.05  -0.03    -0.02   0.02   0.01
    24   1     0.01   0.02  -0.10     0.00  -0.13   0.49     0.00   0.00  -0.02
    25   1    -0.01  -0.03   0.06     0.00   0.10  -0.43     0.00   0.00   0.03
                    28                     29                     30
                     A                      A                      A
 Frequencies --   986.8976               995.7243              1002.0473
 Red. masses --     1.2798                 1.2681                 1.5238
 Frc consts  --     0.7344                 0.7408                 0.9015
 IR Inten    --     0.0295                 0.0907                 1.4852
  Atom  AN      X      Y      Z        X      Y      Z        X      Y      Z
     1   6     0.00   0.00   0.00     0.00  -0.06  -0.07     0.03   0.00   0.00
     2   6     0.00   0.00   0.00     0.00   0.06   0.06     0.01   0.00   0.02
     3   6     0.00   0.00   0.00     0.00  -0.02  -0.03    -0.01  -0.02   0.01
     4   1     0.00   0.00   0.00     0.00  -0.35  -0.36     0.02  -0.06  -0.03
     5   6     0.00   0.00   0.00     0.00   0.05   0.06     0.01   0.01  -0.01
     6   1     0.00   0.01   0.00     0.00   0.39   0.41     0.03   0.03   0.03
     7   6     0.00  -0.01   0.00     0.00  -0.03  -0.02    -0.01   0.02  -0.02
     8   1    -0.01  -0.01  -0.01    -0.01  -0.35  -0.37     0.01  -0.01  -0.03
     9   6     0.00   0.00   0.00     0.00   0.00   0.00    -0.02   0.00   0.00
    10   1     0.00   0.00   0.00     0.00   0.19   0.18    -0.02   0.03   0.06
    11   1     0.01   0.01   0.02     0.00   0.19   0.20    -0.01   0.03  -0.01
    12   6     0.00   0.00   0.00     0.00   0.00   0.00    -0.03  -0.01  -0.01
    13   6     0.00  -0.02   0.05     0.00   0.00   0.00    -0.02  -0.04  -0.01
    14   6     0.00   0.00  -0.01     0.00   0.00   0.00     0.05   0.03   0.01
    15   6     0.00   0.02  -0.10     0.00   0.00   0.00     0.02   0.05   0.02
    16   1     0.00   0.09  -0.37    -0.01   0.01   0.00     0.06  -0.11  -0.01
    17   6     0.00   0.01  -0.05     0.00   0.00   0.00    -0.08  -0.08  -0.02
    18   6     0.00  -0.02   0.09     0.00   0.00   0.00    -0.02   0.01   0.00
    19   1     0.01  -0.15   0.59     0.00   0.00  -0.01     0.13   0.11   0.02
    20   6     0.00   0.00   0.00    -0.01   0.00   0.00     0.13   0.06   0.01
    21   1     0.00   0.00  -0.01     0.00   0.04   0.02     0.03  -0.55  -0.23
    22   1     0.00  -0.01   0.00     0.02   0.01   0.00    -0.23  -0.18  -0.03
    23   1     0.00   0.01  -0.01     0.03  -0.03  -0.02    -0.38   0.48   0.20
    24   1     0.00  -0.09   0.33     0.00   0.01  -0.01    -0.08  -0.09   0.00
    25   1     0.00   0.15  -0.57     0.00  -0.01   0.02    -0.02   0.14   0.04
                    31                     32                     33
                     A                      A                      A
 Frequencies --  1009.8893              1018.7802              1052.2550
 Red. masses --     6.0401                 6.8619                 1.5686
 Frc consts  --     3.6295                 4.1962                 1.0233
 IR Inten    --     0.0221                 8.8795                 3.0389
  Atom  AN      X      Y      Z        X      Y      Z        X      Y      Z
     1   6     0.37  -0.01   0.00     0.07   0.00   0.00     0.04   0.00   0.00
     2   6     0.02  -0.02   0.02    -0.14   0.20  -0.20    -0.01  -0.02   0.02
     3   6    -0.18  -0.23   0.23    -0.03  -0.07   0.08    -0.01   0.02  -0.02
     4   1     0.04  -0.02   0.03    -0.09   0.25  -0.21    -0.10  -0.06   0.06
     5   6     0.02   0.02  -0.01    -0.15  -0.20   0.20     0.00   0.02  -0.02
     6   1     0.39   0.00   0.01     0.06   0.00   0.00     0.04  -0.01   0.01
     7   6    -0.18   0.24  -0.23    -0.03   0.08  -0.08    -0.01  -0.01   0.01
     8   1     0.05   0.00  -0.05    -0.09  -0.24   0.21    -0.09   0.07  -0.06
     9   6    -0.07   0.00   0.00     0.29  -0.01   0.00     0.02  -0.01   0.00
    10   1    -0.15  -0.29   0.23     0.04  -0.12   0.07    -0.12   0.06  -0.06
    11   1    -0.16   0.30  -0.22     0.04   0.11  -0.07    -0.10  -0.06   0.04
    12   6    -0.08   0.01   0.00     0.29  -0.01   0.00     0.03  -0.01   0.02
    13   6     0.01   0.01   0.01    -0.01  -0.02  -0.01     0.00  -0.01   0.00
    14   6    -0.01   0.00  -0.01    -0.01   0.01   0.02     0.00   0.04  -0.13
    15   6     0.04  -0.08  -0.03    -0.12   0.22   0.06    -0.01   0.03   0.00
    16   1    -0.01   0.04  -0.05    -0.01  -0.01   0.03     0.01   0.00  -0.06
    17   6     0.07   0.08   0.02    -0.13  -0.19  -0.06    -0.01  -0.03   0.04
    18   6     0.00   0.00   0.00     0.03  -0.01   0.00     0.00   0.00   0.00
    19   1     0.02  -0.11   0.02    -0.15   0.23   0.04    -0.01   0.02   0.04
    20   6    -0.02  -0.01   0.00    -0.04   0.00  -0.01    -0.01  -0.03   0.14
    21   1    -0.01   0.11   0.04     0.00   0.09   0.06    -0.24   0.39  -0.13
    22   1     0.05   0.02   0.00     0.03   0.08   0.02     0.27  -0.55  -0.30
    23   1     0.07  -0.09  -0.04     0.11  -0.15  -0.03    -0.02   0.31  -0.21
    24   1     0.07   0.08   0.02    -0.14  -0.21  -0.03     0.01   0.01  -0.18
    25   1     0.00  -0.02  -0.02     0.02  -0.04  -0.02     0.00  -0.01  -0.02
                    34                     35                     36
                     A                      A                      A
 Frequencies --  1052.6785              1068.8359              1094.7313
 Red. masses --     1.9344                 2.1623                 1.5827
 Frc consts  --     1.2630                 1.4554                 1.1175
 IR Inten    --     0.8986                 3.7100                 5.1754
  Atom  AN      X      Y      Z        X      Y      Z        X      Y      Z
     1   6     0.13   0.00   0.00    -0.03  -0.01   0.01    -0.01   0.06  -0.06
     2   6    -0.01  -0.09   0.08     0.01   0.01  -0.01     0.06  -0.04   0.04
     3   6    -0.04   0.04  -0.04     0.02  -0.01   0.00    -0.10  -0.04   0.04
     4   1    -0.31  -0.21   0.21     0.05   0.03  -0.03     0.31   0.05  -0.05
     5   6    -0.01   0.08  -0.08     0.03   0.00   0.00    -0.05  -0.04   0.04
     6   1     0.14   0.01  -0.01    -0.03  -0.06   0.06     0.00   0.39  -0.38
     7   6    -0.04  -0.05   0.04    -0.01   0.02  -0.03     0.10  -0.03   0.03
     8   1    -0.33   0.23  -0.21     0.15  -0.05   0.04    -0.25   0.04  -0.03
     9   6     0.05   0.00   0.00    -0.06   0.00   0.03    -0.01   0.04  -0.04
    10   1    -0.34   0.17  -0.16     0.15  -0.04   0.07    -0.43   0.09  -0.10
    11   1    -0.32  -0.16   0.16     0.04   0.08  -0.01     0.48   0.11  -0.12
    12   6     0.08   0.00  -0.01    -0.06  -0.05  -0.02    -0.01   0.01   0.03
    13   6     0.02   0.00   0.00     0.15   0.07   0.02     0.01  -0.01  -0.01
    14   6     0.00  -0.01   0.05     0.02  -0.04  -0.01     0.00   0.00  -0.01
    15   6    -0.03   0.07   0.02    -0.02   0.12   0.03     0.01   0.01   0.00
    16   1     0.06  -0.02   0.01     0.54  -0.19  -0.07     0.06  -0.06   0.03
    17   6    -0.02  -0.05  -0.03     0.06  -0.05  -0.01     0.01  -0.02   0.00
    18   6    -0.03  -0.01   0.00    -0.19  -0.05  -0.01    -0.02   0.00   0.00
    19   1     0.00   0.10   0.01     0.11   0.19   0.06     0.08   0.05   0.01
    20   6    -0.02   0.01  -0.06    -0.03   0.02   0.01    -0.01   0.00   0.00
    21   1     0.08  -0.06   0.09    -0.03   0.10   0.03    -0.01   0.04   0.01
    22   1    -0.06   0.24   0.12     0.01   0.04   0.01     0.02   0.00  -0.01
    23   1     0.08  -0.21   0.05     0.01   0.00  -0.02     0.02  -0.02  -0.01
    24   1     0.04  -0.12   0.04     0.39  -0.28  -0.08     0.07  -0.06  -0.01
    25   1    -0.04  -0.06  -0.01    -0.23  -0.35  -0.09    -0.02  -0.01  -0.01
                    37                     38                     39
                     A                      A                      A
 Frequencies --  1136.8281              1176.2536              1179.7746
 Red. masses --     1.6292                 1.1092                 1.1011
 Frc consts  --     1.2406                 0.9042                 0.9030
 IR Inten    --     3.4954                 0.0063                 0.2460
  Atom  AN      X      Y      Z        X      Y      Z        X      Y      Z
     1   6    -0.01   0.00   0.00     0.00   0.05  -0.05     0.00   0.00   0.00
     2   6     0.01  -0.01   0.01    -0.04  -0.02   0.02     0.00   0.00   0.00
     3   6     0.01   0.00   0.01     0.00  -0.01   0.01     0.00   0.00   0.00
     4   1     0.04   0.00   0.00    -0.42  -0.17   0.17     0.04   0.01  -0.01
     5   6     0.02   0.01  -0.01     0.04  -0.02   0.02     0.00   0.00   0.00
     6   1    -0.01  -0.04   0.04     0.01   0.49  -0.47     0.00  -0.05   0.05
     7   6    -0.02   0.00   0.00     0.00  -0.01   0.01     0.00   0.00   0.00
     8   1     0.10  -0.02   0.02     0.41  -0.18   0.16    -0.05   0.02  -0.02
     9   6    -0.06  -0.01  -0.02     0.00   0.00   0.00     0.00   0.00   0.00
    10   1     0.14  -0.08   0.04     0.15  -0.07   0.06     0.00   0.00   0.00
    11   1    -0.01  -0.01  -0.02    -0.14  -0.06   0.06     0.02   0.01  -0.01
    12   6    -0.01   0.09   0.02     0.00   0.00   0.00     0.00   0.00   0.00
    13   6    -0.09  -0.07  -0.02     0.00   0.00   0.00     0.02  -0.02  -0.01
    14   6     0.02   0.07   0.02     0.00   0.00   0.00     0.01   0.00   0.00
    15   6     0.05   0.03   0.01    -0.01   0.00   0.00    -0.05  -0.02   0.00
    16   1    -0.24   0.02   0.01     0.04  -0.02  -0.01     0.26  -0.18  -0.05
    17   6     0.01  -0.11  -0.03     0.00   0.00   0.00     0.03  -0.02   0.00
    18   6     0.00   0.04   0.01     0.00   0.01   0.00     0.00   0.06   0.01
    19   1     0.54   0.25   0.06    -0.06  -0.03  -0.01    -0.55  -0.24  -0.06
    20   6    -0.04  -0.05  -0.01     0.00   0.00   0.00     0.00   0.00   0.00
    21   1     0.00   0.12   0.07     0.00   0.00   0.00     0.00   0.00   0.00
    22   1     0.11   0.03  -0.01     0.00   0.00   0.00     0.00   0.00   0.00
    23   1     0.14  -0.20  -0.10     0.00   0.01   0.00     0.01   0.00  -0.01
    24   1     0.36  -0.34  -0.10     0.02  -0.01   0.00     0.28  -0.19  -0.05
    25   1     0.02   0.36   0.09     0.00   0.05   0.01     0.04   0.61   0.15
                    40                     41                     42
                     A                      A                      A
 Frequencies --  1196.9428              1212.8945              1284.0926
 Red. masses --     1.1314                 2.4983                 2.1834
 Frc consts  --     0.9550                 2.1654                 2.1211
 IR Inten    --     0.2962                 0.1514                 1.1940
  Atom  AN      X      Y      Z        X      Y      Z        X      Y      Z
     1   6    -0.01   0.00   0.00    -0.01   0.00   0.00     0.00   0.01  -0.01
     2   6    -0.04  -0.02   0.02     0.01  -0.01   0.01     0.02  -0.04   0.03
     3   6     0.05  -0.02   0.02     0.00   0.00   0.00    -0.03   0.00   0.00
     4   1    -0.42  -0.17   0.17     0.06   0.01  -0.01     0.23   0.04  -0.04
     5   6    -0.04   0.02  -0.02     0.02   0.01  -0.01     0.05   0.02  -0.02
     6   1    -0.01   0.00   0.00     0.00  -0.02   0.02     0.00  -0.02   0.01
     7   6     0.05   0.02  -0.02    -0.01   0.00   0.00    -0.05  -0.02   0.02
     8   1    -0.43   0.19  -0.17     0.06  -0.01   0.01     0.11  -0.01   0.00
     9   6    -0.01   0.00   0.00    -0.05   0.00   0.00    -0.16   0.03  -0.04
    10   1     0.44  -0.19   0.18     0.06  -0.03   0.02     0.24  -0.14   0.10
    11   1     0.44   0.18  -0.18     0.02   0.01  -0.01     0.07   0.03  -0.03
    12   6     0.00   0.00   0.00     0.02   0.09   0.02     0.15   0.06   0.02
    13   6     0.00   0.00   0.00     0.02  -0.12  -0.03     0.03  -0.02  -0.01
    14   6     0.00   0.00   0.00    -0.11   0.25   0.07     0.16  -0.04  -0.01
    15   6     0.00   0.00   0.00    -0.03   0.02   0.00    -0.04   0.01   0.00
    16   1     0.00   0.00   0.00     0.50  -0.45  -0.11     0.17  -0.12  -0.03
    17   6     0.00   0.00   0.00    -0.05   0.04   0.01    -0.04  -0.07  -0.02
    18   6     0.00   0.00   0.00     0.08  -0.05  -0.01    -0.04   0.00   0.00
    19   1     0.00   0.00   0.00    -0.19  -0.06  -0.02    -0.10  -0.01   0.00
    20   6     0.00   0.00   0.00     0.04  -0.11  -0.03    -0.06   0.01   0.01
    21   1     0.00   0.00   0.00     0.05  -0.17  -0.04     0.00   0.16   0.11
    22   1     0.00   0.00   0.00     0.07  -0.14  -0.06     0.10   0.11   0.02
    23   1     0.00   0.01  -0.01     0.12  -0.18  -0.06     0.02  -0.02  -0.05
    24   1    -0.02   0.01   0.00    -0.01   0.03   0.00    -0.68   0.35   0.09
    25   1     0.00  -0.01   0.00     0.05  -0.47  -0.12    -0.03   0.13   0.03
                    43                     44                     45
                     A                      A                      A
 Frequencies --  1290.7630              1318.1440              1320.5912
 Red. masses --     2.7629                 2.3217                 6.4929
 Frc consts  --     2.7122                 2.3768                 6.6715
 IR Inten    --     1.3470                 0.2760                 0.1109
  Atom  AN      X      Y      Z        X      Y      Z        X      Y      Z
     1   6     0.00   0.03  -0.03     0.00   0.05  -0.05     0.00  -0.09   0.09
     2   6    -0.08  -0.01   0.01    -0.06  -0.06   0.05     0.14   0.04  -0.04
     3   6     0.07  -0.04   0.04     0.03  -0.03   0.03    -0.13   0.07  -0.06
     4   1     0.03   0.04  -0.04     0.30   0.09  -0.09    -0.14  -0.07   0.07
     5   6     0.02  -0.05   0.05     0.10  -0.03   0.03    -0.11   0.07  -0.07
     6   1     0.00  -0.05   0.05     0.00  -0.02   0.03     0.00   0.08  -0.08
     7   6    -0.01  -0.02   0.03    -0.07  -0.04   0.04     0.09   0.06  -0.05
     8   1    -0.31   0.08  -0.07    -0.13   0.07  -0.06     0.29  -0.10   0.09
     9   6     0.14   0.10  -0.12    -0.08   0.14  -0.11    -0.08  -0.17   0.14
    10   1     0.07  -0.05   0.04     0.25  -0.12   0.12     0.02  -0.01  -0.02
    11   1    -0.36  -0.19   0.16    -0.07  -0.04   0.05     0.14   0.07  -0.08
    12   6    -0.13   0.19   0.06     0.10  -0.04   0.00     0.10   0.24   0.04
    13   6     0.02  -0.04  -0.01     0.09  -0.03  -0.01     0.20  -0.13  -0.03
    14   6    -0.04  -0.09  -0.03    -0.12  -0.02  -0.01    -0.23  -0.14  -0.03
    15   6    -0.04  -0.08  -0.02    -0.03   0.03   0.01    -0.20  -0.07  -0.01
    16   1     0.42  -0.33  -0.07    -0.45   0.34   0.09    -0.27   0.20   0.03
    17   6     0.09  -0.04  -0.01     0.01   0.00   0.00     0.17  -0.13  -0.03
    18   6    -0.02   0.06   0.01     0.02   0.06   0.02     0.02   0.21   0.05
    19   1     0.33   0.08   0.02    -0.22  -0.06  -0.01     0.11   0.08   0.02
    20   6     0.00   0.01   0.01     0.04   0.01   0.01     0.05   0.03   0.01
    21   1    -0.02   0.03  -0.01    -0.02  -0.10  -0.10    -0.02  -0.09  -0.11
    22   1    -0.06   0.01   0.02    -0.10  -0.08  -0.01    -0.19  -0.07   0.01
    23   1    -0.06   0.08   0.02    -0.03   0.05   0.03    -0.12   0.14   0.10
    24   1    -0.24   0.18   0.06     0.32  -0.21  -0.05    -0.11   0.05   0.03
    25   1    -0.02   0.01   0.00     0.00  -0.26  -0.07    -0.02  -0.26  -0.07
                    46                     47                     48
                     A                      A                      A
 Frequencies --  1344.2453              1410.1810              1456.4548
 Red. masses --     1.6090                 1.2384                 1.9514
 Frc consts  --     1.7130                 1.4510                 2.4389
 IR Inten    --     0.3286                 1.9154                 4.8172
  Atom  AN      X      Y      Z        X      Y      Z        X      Y      Z
     1   6     0.00   0.09  -0.08     0.00   0.00   0.00     0.00   0.04  -0.04
     2   6    -0.04   0.00   0.00     0.00   0.00   0.00     0.10   0.01  -0.01
     3   6     0.12  -0.03   0.03     0.00   0.00   0.00    -0.04  -0.03   0.03
     4   1    -0.25  -0.09   0.08     0.00   0.00   0.00    -0.27  -0.14   0.14
     5   6     0.04   0.00   0.00     0.00   0.00   0.00    -0.10   0.00   0.00
     6   1     0.00  -0.25   0.24     0.00   0.00   0.00    -0.01  -0.28   0.26
     7   6    -0.12  -0.03   0.03     0.00   0.00   0.00     0.06  -0.02   0.02
     8   1     0.26  -0.10   0.08    -0.01   0.00   0.00     0.19  -0.13   0.12
     9   6    -0.01  -0.03   0.02     0.00   0.00   0.00     0.01   0.05  -0.06
    10   1    -0.47   0.22  -0.21     0.01   0.00   0.01    -0.01  -0.06   0.05
    11   1     0.50   0.22  -0.22    -0.01   0.00   0.01    -0.08  -0.09   0.08
    12   6     0.01   0.03   0.00     0.00   0.00   0.00    -0.05   0.06   0.02
    13   6     0.02  -0.01   0.00     0.00   0.01   0.00    -0.01  -0.06  -0.02
    14   6    -0.01  -0.01   0.00     0.01  -0.02  -0.01     0.08  -0.04  -0.01
    15   6    -0.02  -0.01   0.00    -0.01  -0.01   0.00     0.12   0.02   0.00
    16   1     0.00   0.00   0.00     0.00   0.00   0.00    -0.15   0.01   0.01
    17   6     0.02  -0.02   0.00     0.01   0.00   0.00    -0.07  -0.02  -0.01
    18   6     0.00   0.02   0.00     0.00   0.01   0.00    -0.02   0.09   0.02
    19   1     0.04   0.02   0.00     0.02   0.01   0.00    -0.39  -0.22  -0.05
    20   6     0.00   0.01   0.00    -0.06   0.13   0.03    -0.04   0.00   0.00
    21   1     0.00  -0.01  -0.01     0.09  -0.56   0.09     0.10  -0.02   0.18
    22   1    -0.02  -0.01   0.00     0.21  -0.42  -0.39     0.23   0.08  -0.03
    23   1     0.00  -0.01   0.01     0.34  -0.40   0.04    -0.08   0.10  -0.03
    24   1    -0.05   0.03   0.01    -0.02   0.02   0.01     0.10  -0.15  -0.04
    25   1     0.00   0.01   0.00     0.00   0.02   0.00    -0.07  -0.42  -0.10
                    49                     50                     51
                     A                      A                      A
 Frequencies --  1470.1917              1484.1372              1492.0929
 Red. masses --     1.9477                 1.0603                 1.3671
 Frc consts  --     2.4805                 1.3760                 1.7933
 IR Inten    --     4.3330                 8.1863                13.0373
  Atom  AN      X      Y      Z        X      Y      Z        X      Y      Z
     1   6    -0.01  -0.06   0.06     0.00  -0.01   0.01    -0.01   0.02  -0.02
     2   6    -0.10   0.01  -0.01    -0.01   0.00   0.00     0.02   0.00   0.00
     3   6     0.08   0.02  -0.02     0.01   0.00   0.00    -0.01  -0.01   0.01
     4   1     0.16   0.13  -0.13     0.01   0.01  -0.01    -0.07  -0.04   0.04
     5   6     0.11  -0.01   0.01     0.01   0.00   0.00    -0.01  -0.01   0.01
     6   1    -0.01   0.32  -0.31     0.00   0.02  -0.02    -0.01  -0.07   0.07
     7   6    -0.05   0.04  -0.04    -0.01   0.00   0.00     0.02   0.00   0.00
     8   1    -0.29   0.17  -0.15    -0.02   0.01  -0.01     0.00  -0.02   0.02
     9   6     0.01  -0.08   0.07    -0.01  -0.01   0.00     0.00   0.03  -0.01
    10   1    -0.15   0.12  -0.12     0.00   0.01   0.00    -0.01  -0.02   0.01
    11   1     0.01   0.07  -0.07     0.00   0.00  -0.01    -0.06  -0.03   0.04
    12   6    -0.07   0.05   0.00     0.01   0.01   0.00    -0.02  -0.06  -0.01
    13   6     0.02  -0.06  -0.01    -0.01   0.00   0.00     0.06   0.01   0.00
    14   6     0.06   0.01   0.00     0.00   0.00  -0.02    -0.05   0.06   0.01
    15   6     0.06   0.01   0.00     0.01   0.00   0.00    -0.08   0.01   0.00
    16   1    -0.17   0.06   0.01     0.03  -0.03  -0.01    -0.08   0.11   0.03
    17   6    -0.02  -0.05  -0.01    -0.01   0.01   0.00     0.05   0.00   0.00
    18   6    -0.03   0.09   0.02     0.00   0.00   0.00     0.01  -0.05  -0.01
    19   1    -0.27  -0.14  -0.03    -0.01  -0.01   0.00     0.14   0.11   0.03
    20   6    -0.04  -0.02  -0.01     0.02   0.01  -0.05    -0.03  -0.04  -0.03
    21   1     0.14  -0.09   0.22     0.24   0.36   0.37     0.31  -0.18   0.42
    22   1     0.34   0.14  -0.02    -0.14  -0.33  -0.19     0.56   0.14  -0.09
    23   1    -0.09   0.16  -0.10    -0.33  -0.18   0.60    -0.27   0.31  -0.03
    24   1    -0.05  -0.04  -0.01     0.05  -0.04  -0.01    -0.10   0.11   0.02
    25   1    -0.06  -0.27  -0.07     0.00  -0.02  -0.01     0.03   0.23   0.06
                    52                     53                     54
                     A                      A                      A
 Frequencies --  1507.3881              1526.5307              1603.3214
 Red. masses --     1.9109                 2.5435                 5.3720
 Frc consts  --     2.5582                 3.4921                 8.1363
 IR Inten    --    32.6972                 1.1958                 1.2859
  Atom  AN      X      Y      Z        X      Y      Z        X      Y      Z
     1   6    -0.06   0.01  -0.01     0.09   0.00   0.00     0.01   0.16  -0.15
     2   6     0.07   0.04  -0.04    -0.10  -0.06   0.06    -0.04  -0.09   0.08
     3   6     0.04  -0.05   0.04    -0.05   0.05  -0.05    -0.06   0.07  -0.07
     4   1    -0.28  -0.09   0.09     0.34   0.11  -0.11     0.14  -0.03   0.02
     5   6     0.05  -0.05   0.05    -0.10   0.06  -0.06     0.02  -0.08   0.08
     6   1    -0.07  -0.04   0.04     0.11  -0.01   0.01     0.01  -0.23   0.23
     7   6     0.06   0.04  -0.04    -0.04  -0.05   0.05     0.08   0.07  -0.07
     8   1    -0.24   0.07  -0.06     0.34  -0.12   0.11    -0.11  -0.04   0.04
     9   6    -0.06   0.02  -0.01     0.15   0.00   0.00     0.01  -0.08   0.09
    10   1    -0.23   0.07  -0.05     0.33  -0.09   0.09     0.18  -0.02   0.04
    11   1    -0.27  -0.09   0.09     0.31   0.07  -0.08    -0.18  -0.02   0.05
    12   6    -0.07  -0.04  -0.01    -0.14  -0.02   0.00    -0.06  -0.19  -0.05
    13   6     0.08  -0.06  -0.02     0.06  -0.06  -0.02     0.02   0.11   0.03
    14   6     0.02   0.10   0.03     0.01   0.09   0.02     0.15   0.15   0.04
    15   6     0.01   0.06   0.02     0.04   0.06   0.01    -0.17  -0.18  -0.04
    16   1    -0.29   0.19   0.05    -0.27   0.16   0.05     0.18   0.01  -0.01
    17   6     0.08  -0.06  -0.02     0.09  -0.06  -0.02    -0.04  -0.12  -0.03
    18   6    -0.05  -0.03  -0.01    -0.06  -0.02   0.00     0.08   0.29   0.07
    19   1    -0.19  -0.02   0.00    -0.20  -0.04  -0.01     0.30   0.01   0.00
    20   6     0.02  -0.01   0.00     0.00  -0.01  -0.01    -0.01  -0.02  -0.01
    21   1    -0.13   0.15  -0.18    -0.03   0.09  -0.03    -0.04   0.15  -0.02
    22   1    -0.30  -0.13   0.02    -0.12  -0.09  -0.02    -0.11  -0.05   0.00
    23   1     0.14  -0.25   0.08     0.04  -0.15   0.08     0.06  -0.16   0.05
    24   1    -0.31   0.20   0.06    -0.27   0.18   0.05    -0.06  -0.12  -0.03
    25   1    -0.05   0.15   0.04    -0.06   0.10   0.03     0.03  -0.41  -0.10
                    55                     56                     57
                     A                      A                      A
 Frequencies --  1614.7574              1637.1460              1638.5840
 Red. masses --     5.8114                 5.6906                 5.7270
 Frc consts  --     8.9278                 8.9864                 9.0598
 IR Inten    --     1.2540                 3.6880                 3.1515
  Atom  AN      X      Y      Z        X      Y      Z        X      Y      Z
     1   6     0.00   0.23  -0.22     0.08   0.02  -0.02     0.12  -0.02   0.02
     2   6    -0.06  -0.13   0.12    -0.16  -0.04   0.04    -0.23  -0.03   0.03
     3   6    -0.08   0.11  -0.11     0.15  -0.02   0.02     0.25  -0.06   0.06
     4   1     0.21  -0.04   0.03     0.16   0.09  -0.09     0.20   0.14  -0.14
     5   6     0.06  -0.13   0.12    -0.14   0.02  -0.02    -0.24   0.06  -0.05
     6   1     0.00  -0.31   0.30     0.09  -0.02   0.02     0.13   0.02  -0.02
     7   6     0.09   0.11  -0.11     0.16   0.04  -0.04     0.25   0.03  -0.04
     8   1    -0.21  -0.03   0.03     0.11  -0.09   0.09     0.23  -0.15   0.14
     9   6    -0.02  -0.19   0.16    -0.09  -0.03   0.02    -0.21   0.03  -0.01
    10   1     0.24  -0.02   0.01    -0.13   0.10  -0.10    -0.27   0.16  -0.15
    11   1    -0.26  -0.02   0.02    -0.17  -0.10   0.08    -0.23  -0.16   0.16
    12   6     0.07   0.15   0.02    -0.12   0.11   0.02     0.13  -0.07  -0.01
    13   6    -0.07  -0.06  -0.01     0.25  -0.13  -0.03    -0.15   0.08   0.02
    14   6    -0.12  -0.10  -0.03     0.19  -0.07  -0.02    -0.12   0.04   0.01
    15   6     0.16   0.12   0.03    -0.20   0.02   0.01     0.12  -0.01   0.00
    16   1    -0.06  -0.07  -0.03    -0.27   0.22   0.05     0.17  -0.14  -0.04
    17   6     0.06   0.06   0.02    -0.24   0.17   0.04     0.14  -0.10  -0.03
    18   6    -0.07  -0.16  -0.04     0.11  -0.14  -0.04    -0.06   0.08   0.02
    19   1    -0.25  -0.06  -0.01     0.15   0.20   0.05    -0.09  -0.11  -0.03
    20   6     0.01   0.01   0.00    -0.02   0.01   0.01     0.01  -0.01   0.00
    21   1     0.04  -0.10   0.02    -0.06   0.08  -0.05     0.03  -0.06   0.02
    22   1     0.07   0.03  -0.01    -0.08   0.01   0.03     0.05   0.00  -0.01
    23   1    -0.05   0.11  -0.02     0.07  -0.08  -0.01    -0.04   0.05   0.00
    24   1     0.01   0.10   0.02     0.31  -0.20  -0.05    -0.18   0.12   0.03
    25   1    -0.05   0.21   0.05     0.15   0.16   0.04    -0.08  -0.09  -0.02
                    58                     59                     60
                     A                      A                      A
 Frequencies --  3021.7616              3080.0119              3108.1238
 Red. masses --     1.0394                 1.0956                 1.1021
 Frc consts  --     5.5916                 6.1238                 6.2731
 IR Inten    --    22.2584                18.4982                16.1448
  Atom  AN      X      Y      Z        X      Y      Z        X      Y      Z
     1   6     0.00   0.00   0.00     0.00   0.00   0.00     0.00   0.00   0.00
     2   6     0.00   0.00   0.00     0.00   0.00   0.00     0.00   0.00   0.00
     3   6     0.00   0.00   0.00     0.00   0.00   0.00     0.00   0.00   0.00
     4   1     0.00   0.00   0.00     0.00   0.00   0.00     0.00   0.00   0.00
     5   6     0.00   0.00   0.00     0.00   0.00   0.00     0.00   0.00   0.00
     6   1     0.00   0.00   0.00     0.00   0.00   0.00     0.00   0.00   0.00
     7   6     0.00   0.00   0.00     0.00   0.00   0.00     0.00   0.00   0.00
     8   1     0.00   0.00   0.00     0.00   0.00   0.00     0.00   0.00   0.00
     9   6     0.00   0.00   0.00     0.00   0.00   0.00     0.00   0.00   0.00
    10   1     0.01   0.01  -0.01    -0.01  -0.01   0.01     0.00   0.00   0.00
    11   1     0.00   0.00   0.00     0.00   0.00   0.00     0.00   0.00   0.00
    12   6     0.00   0.00   0.00     0.00   0.00   0.00     0.00   0.00   0.00
    13   6     0.00   0.00   0.00     0.00   0.00   0.00     0.00   0.00   0.00
    14   6     0.00   0.00   0.00     0.00   0.00   0.00     0.00   0.00   0.00
    15   6     0.00   0.00   0.00     0.00   0.00   0.00     0.00   0.00   0.00
    16   1     0.00   0.00   0.00     0.00   0.00   0.00     0.00   0.00   0.00
    17   6     0.00   0.00   0.00     0.00   0.00   0.00     0.00   0.00   0.00
    18   6     0.00   0.00   0.00     0.00   0.00   0.00     0.00   0.00   0.00
    19   1     0.00   0.00   0.00     0.00   0.00   0.00     0.00   0.00   0.00
    20   6    -0.02   0.05  -0.01     0.01   0.00   0.09     0.08   0.04  -0.01
    21   1     0.36   0.06  -0.25     0.42   0.06  -0.26    -0.61  -0.08   0.43
    22   1     0.19  -0.39   0.63    -0.16   0.33  -0.51     0.03   0.00   0.02
    23   1    -0.32  -0.24  -0.25    -0.40  -0.32  -0.29    -0.44  -0.35  -0.34
    24   1     0.01   0.01   0.00     0.01   0.02   0.01     0.02   0.03   0.01
    25   1     0.00   0.00   0.00     0.00   0.00   0.00    -0.01   0.00   0.00
                    61                     62                     63
                     A                      A                      A
 Frequencies --  3151.1260              3156.9982              3161.0964
 Red. masses --     1.0865                 1.0845                 1.0874
 Frc consts  --     6.3562                 6.3686                 6.4018
 IR Inten    --     9.4063                 2.9589                 2.3078
  Atom  AN      X      Y      Z        X      Y      Z        X      Y      Z
     1   6     0.00   0.00   0.00    -0.04   0.00   0.00    -0.01   0.00   0.00
     2   6     0.00   0.00   0.00     0.02  -0.03   0.02     0.01  -0.01   0.01
     3   6     0.00   0.00   0.00     0.01   0.01  -0.01     0.00   0.01  -0.01
     4   1     0.00   0.00   0.00    -0.24   0.31  -0.29    -0.07   0.09  -0.09
     5   6     0.00   0.00   0.00     0.02   0.03  -0.03     0.00   0.00   0.00
     6   1     0.00   0.00   0.00     0.50  -0.01   0.00     0.07   0.00   0.00
     7   6     0.00   0.00   0.00     0.01  -0.02   0.02    -0.01   0.01  -0.01
     8   1     0.00  -0.01   0.00    -0.27  -0.33   0.32     0.02   0.03  -0.03
     9   6     0.00   0.00   0.00     0.00   0.00   0.00     0.00   0.00   0.00
    10   1     0.00   0.00   0.00    -0.14  -0.17   0.17    -0.05  -0.07   0.07
    11   1     0.00   0.00   0.00    -0.19   0.24  -0.23     0.06  -0.08   0.08
    12   6     0.00   0.00   0.00     0.00   0.00   0.00     0.00   0.00   0.00
    13   6     0.01   0.01   0.00     0.00   0.00   0.00    -0.03  -0.05  -0.01
    14   6     0.00   0.00   0.00     0.00   0.00   0.00     0.00   0.00   0.00
    15   6     0.01  -0.02   0.00     0.00   0.00   0.00    -0.02   0.04   0.01
    16   1    -0.09  -0.12  -0.03    -0.03  -0.04  -0.01     0.39   0.54   0.14
    17   6     0.04   0.06   0.02     0.00   0.00   0.00     0.02   0.02   0.01
    18   6    -0.04   0.00   0.00     0.00   0.00   0.00     0.01   0.00   0.00
    19   1    -0.09   0.20   0.05    -0.01   0.02   0.01     0.24  -0.50  -0.13
    20   6     0.00   0.00   0.00     0.00   0.00   0.00     0.00   0.00   0.00
    21   1    -0.01   0.00   0.01     0.00   0.00   0.00     0.00   0.00   0.00
    22   1     0.00   0.00   0.00     0.00   0.00   0.00     0.00   0.00   0.00
    23   1    -0.02  -0.02  -0.02     0.00   0.00   0.00    -0.01  -0.01  -0.01
    24   1    -0.48  -0.67  -0.18     0.02   0.02   0.01    -0.20  -0.28  -0.08
    25   1     0.44  -0.03  -0.01     0.00   0.00   0.00    -0.15   0.01   0.00
                    64                     65                     66
                     A                      A                      A
 Frequencies --  3163.2844              3172.0826              3172.9698
 Red. masses --     1.0872                 1.0920                 1.0916
 Frc consts  --     6.4098                 6.4737                 6.4750
 IR Inten    --     1.0767                29.1646                 4.3932
  Atom  AN      X      Y      Z        X      Y      Z        X      Y      Z
     1   6    -0.01   0.00   0.00     0.03   0.00   0.00    -0.04   0.00   0.00
     2   6     0.02  -0.03   0.03     0.00   0.00   0.00     0.00   0.00   0.00
     3   6     0.02   0.02  -0.02     0.01   0.02  -0.02    -0.02  -0.02   0.02
     4   1    -0.26   0.33  -0.32    -0.02   0.03  -0.03     0.02  -0.03   0.02
     5   6    -0.02  -0.02   0.02    -0.01  -0.01   0.01     0.01   0.01  -0.01
     6   1     0.07   0.00   0.00    -0.32   0.00   0.00     0.49  -0.01   0.00
     7   6    -0.02   0.03  -0.03     0.01  -0.02   0.02    -0.02   0.03  -0.03
     8   1     0.22   0.27  -0.26     0.07   0.08  -0.08    -0.07  -0.08   0.08
     9   6     0.00   0.00   0.00     0.00   0.00   0.00     0.00   0.00   0.00
    10   1    -0.23  -0.28   0.28    -0.15  -0.18   0.18     0.22   0.27  -0.27
    11   1     0.25  -0.33   0.31    -0.15   0.19  -0.18     0.24  -0.31   0.29
    12   6     0.00   0.00   0.00     0.00   0.00   0.00     0.00   0.00   0.00
    13   6     0.01   0.01   0.00     0.02   0.03   0.01     0.02   0.02   0.01
    14   6     0.00   0.00   0.00     0.00   0.00   0.00     0.00   0.00   0.00
    15   6     0.01  -0.01   0.00    -0.01   0.02   0.01    -0.01   0.01   0.00
    16   1    -0.08  -0.11  -0.03    -0.28  -0.39  -0.10    -0.20  -0.27  -0.07
    17   6     0.00  -0.01   0.00     0.01   0.02   0.01     0.01   0.01   0.00
    18   6     0.00   0.00   0.00     0.05  -0.01   0.00     0.03   0.00   0.00
    19   1    -0.06   0.13   0.03     0.13  -0.26  -0.07     0.07  -0.13  -0.03
    20   6     0.00   0.00   0.00     0.00   0.00   0.00     0.00   0.00   0.00
    21   1     0.00   0.00   0.00     0.00   0.00   0.00     0.00   0.00   0.00
    22   1     0.00  -0.01   0.01     0.00   0.00   0.00     0.00   0.00  -0.01
    23   1     0.01   0.00   0.00     0.00   0.00   0.00    -0.01   0.00   0.00
    24   1     0.05   0.07   0.02    -0.15  -0.21  -0.06    -0.09  -0.13  -0.04
    25   1     0.06   0.00   0.00    -0.54   0.04   0.01    -0.36   0.03   0.01
                    67                     68                     69
                     A                      A                      A
 Frequencies --  3179.1096              3185.8734              3188.1994
 Red. masses --     1.0947                 1.0980                 1.0986
 Frc consts  --     6.5185                 6.5662                 6.5793
 IR Inten    --    28.5787                26.5329                12.9310
  Atom  AN      X      Y      Z        X      Y      Z        X      Y      Z
     1   6    -0.01   0.00   0.00     0.01   0.00   0.00    -0.06   0.00   0.00
     2   6     0.02  -0.03   0.02     0.00   0.00   0.00    -0.02   0.03  -0.03
     3   6    -0.03  -0.03   0.03     0.00   0.00   0.00     0.02   0.02  -0.02
     4   1    -0.23   0.29  -0.28    -0.03   0.03  -0.03     0.24  -0.31   0.29
     5   6    -0.02  -0.03   0.03     0.00   0.00   0.00    -0.02  -0.03   0.03
     6   1     0.10   0.00   0.00    -0.07   0.00   0.00     0.61  -0.01   0.00
     7   6     0.02  -0.02   0.02     0.00   0.00   0.00     0.01  -0.01   0.01
     8   1     0.26   0.32  -0.31    -0.02  -0.03   0.03     0.23   0.29  -0.28
     9   6     0.00   0.00   0.00     0.00   0.00   0.00     0.00   0.00   0.00
    10   1     0.29   0.35  -0.35     0.02   0.02  -0.02    -0.16  -0.19   0.19
    11   1    -0.21   0.26  -0.25     0.00   0.00   0.00    -0.12   0.15  -0.15
    12   6     0.00   0.00   0.00     0.00   0.00   0.00     0.00   0.00   0.00
    13   6     0.00   0.00   0.00    -0.02  -0.02  -0.01     0.00   0.00   0.00
    14   6     0.00   0.00   0.00     0.00   0.00   0.00     0.00   0.00   0.00
    15   6     0.00   0.00   0.00     0.03  -0.06  -0.01     0.00  -0.01   0.00
    16   1     0.01   0.02   0.01     0.20   0.28   0.07     0.03   0.04   0.01
    17   6     0.00   0.00   0.00     0.01   0.02   0.00     0.00   0.00   0.00
    18   6     0.00   0.00   0.00     0.05   0.00   0.00     0.01   0.00   0.00
    19   1     0.00  -0.01   0.00    -0.29   0.61   0.16    -0.03   0.06   0.02
    20   6     0.00   0.00   0.00     0.00   0.00   0.00     0.00   0.00   0.00
    21   1     0.00   0.00   0.00     0.00   0.00   0.00     0.00   0.00   0.00
    22   1     0.00   0.01  -0.01     0.00   0.00   0.00     0.00   0.00   0.00
    23   1     0.00   0.00   0.00     0.00   0.00   0.00     0.00   0.00   0.00
    24   1     0.00   0.01   0.00    -0.10  -0.15  -0.04    -0.01  -0.02   0.00
    25   1     0.02   0.00   0.00    -0.58   0.04   0.01    -0.06   0.00   0.00
    
    
    
    
    Vibrational Energies and Rotational Constants (cm-1)
 Mode(Quanta)     E(harm)     E(anharm)    Aa(z)       Ba(x)       Ca(y)
 Equilibrium Geometry                     0.061549    0.017334    0.014844
 Ground State   45541.097    44340.026    0.061224    0.017266    0.014762
 Fundamental Bands (DE w.r.t. Ground State)
  1(1)           3188.199     3049.116    0.061215    0.017262    0.014763
  2(1)           3185.873     3044.991    0.061212    0.017264    0.014761
  3(1)           3179.110     3066.344    0.061220    0.017257    0.014766
  4(1)           3172.970     3047.757    0.061219    0.017259    0.014765
  5(1)           3172.083     3049.328    0.061214    0.017262    0.014762
  6(1)           3163.284     3033.527    0.061220    0.017259    0.014764
  7(1)           3161.096     3040.471    0.061215    0.017263    0.014760
  8(1)           3156.998     3012.748    0.061216    0.017262    0.014762
  9(1)           3151.126     3011.033    0.061205    0.017266    0.014759
 10(1)           3108.124     2943.456    0.061226    0.017258    0.014769
 11(1)           3080.012     2927.246    0.061210    0.017268    0.014757
 12(1)           3021.762     2913.625    0.061202    0.017269    0.014755
 13(1)           1638.584     1598.194    0.061185    0.017259    0.014757
 14(1)           1637.146     1596.968    0.061186    0.017258    0.014760
 15(1)           1614.757     1577.798    0.061188    0.017248    0.014743
 16(1)           1603.321     1556.325    0.061178    0.017258    0.014741
 17(1)           1526.531     1494.291    0.061193    0.017257    0.014757
 18(1)           1507.388     1452.758    0.061206    0.017265    0.014761
 19(1)           1492.093     1356.241    0.061245    0.017265    0.014761
 20(1)           1484.137     1221.498    0.061286    0.017268    0.014761
 21(1)           1470.192     1409.908    0.061226    0.017256    0.014758
 22(1)           1456.455     1404.962    0.061216    0.017263    0.014750
 23(1)           1410.181     1287.929    0.061136    0.017267    0.014756
 24(1)           1344.245     1349.032    0.061223    0.017259    0.014762
 25(1)           1320.591     1284.646    0.061175    0.017246    0.014754
 26(1)           1318.144     1284.022    0.061220    0.017249    0.014760
 27(1)           1290.763     1265.891    0.061159    0.017256    0.014734
 28(1)           1284.093     1250.622    0.061222    0.017248    0.014747
 29(1)           1212.894     1186.930    0.061172    0.017264    0.014755
 30(1)           1196.943     1214.737    0.061216    0.017267    0.014763
 31(1)           1179.775     1164.649    0.061241    0.017265    0.014761
 32(1)           1176.254     1167.152    0.061244    0.017264    0.014761
 33(1)           1136.828     1108.746    0.061215    0.017265    0.014759
 34(1)           1094.731     1095.720    0.061240    0.017263    0.014761
 35(1)           1068.836     1051.597    0.061235    0.017261    0.014762
 36(1)           1052.678     1031.425    0.061209    0.017263    0.014759
 37(1)           1052.255      999.410    0.061193    0.017266    0.014761
 38(1)           1018.780     1001.942    0.061232    0.017260    0.014757
 39(1)           1009.889      991.672    0.061223    0.017260    0.014758
 40(1)           1002.047      796.413    0.061200    0.017265    0.014757
 41(1)            995.724      995.030    0.061191    0.017264    0.014761
 42(1)            986.898      975.477    0.061188    0.017263    0.014762
 43(1)            977.202     1011.275    0.061194    0.017264    0.014761
 44(1)            953.043      942.190    0.061203    0.017261    0.014766
 45(1)            927.517      971.912    0.061199    0.017266    0.014762
 46(1)            878.350      863.652    0.061213    0.017264    0.014762
 47(1)            855.766      903.504    0.061224    0.017264    0.014761
 48(1)            814.700      791.602    0.061208    0.017265    0.014759
 49(1)            787.461      774.521    0.061216    0.017259    0.014768
 50(1)            759.900      750.113    0.061197    0.017272    0.014755
 51(1)            737.908      718.005    0.061211    0.017270    0.014757
 52(1)            724.895      715.115    0.061206    0.017260    0.014757
 53(1)            712.991      743.442    0.061235    0.017265    0.014761
 54(1)            631.471      625.768    0.061227    0.017264    0.014761
 55(1)            626.978      621.946    0.061239    0.017265    0.014761
 56(1)            570.081      570.195    0.061201    0.017265    0.014762
 57(1)            554.115      545.737    0.061211    0.017271    0.014755
 58(1)            519.932      512.661    0.061196    0.017277    0.014750
 59(1)            462.963      438.960    0.061227    0.017269    0.014766
 60(1)            412.688      404.685    0.061211    0.017270    0.014765
 61(1)            406.265      321.251    0.061237    0.017258    0.014772
 62(1)            327.766      284.453    0.061267    0.017266    0.014764
 63(1)            293.842      287.405    0.061192    0.017267    0.014764
 64(1)            264.345      187.111    0.061188    0.017265    0.014755
 65(1)            194.441       64.831    0.061232    0.017267    0.014767
 66(1)            131.422    -1799.905    0.061394    0.017300    0.014767
 67(1)            102.720      107.090    0.061583    0.017278    0.014766
 68(1)             86.838       83.945    0.060857    0.017278    0.014775
 69(1)             42.805      117.746    0.061194    0.017265    0.014768
 
 
