# Supplementary material for: Low-energy vibrational spectra of flexible diphenyl molecules: biphenyl, diphenylmethane, bibenzyl and 2-, 3- and 4-phenyltoluene
Source: Royal Society of Chemistry journal article supplement (doi:10.1039/c4cp03278k), 2014-01-01
Supplement: c4cp03278k2.log [file c4cp03278k2.log]

Harmonic frequencies (cm**-1), IR intensities (KM/Mole), Raman scattering
 activities (A**4/AMU), depolarization ratios for plane and unpolarized
 incident light, reduced masses (AMU), force constants (mDyne/A),
 and normal coordinates:
                     1                      2                      3
                     A                      A                      A
 Frequencies --    30.3767                57.6728                90.1358
 Red. masses --     1.0180                 3.6418                 4.2750
 Frc consts  --     0.0006                 0.0071                 0.0205
 IR Inten    --     0.2759                 0.0618                 0.8701
  Atom  AN      X      Y      Z        X      Y      Z        X      Y      Z
     1   6     0.00   0.00   0.01     0.01   0.00  -0.04    -0.03  -0.09   0.22
     2   6     0.00   0.00   0.01    -0.03  -0.09   0.16     0.00  -0.06   0.12
     3   6     0.00   0.00   0.00    -0.02  -0.08   0.18     0.02   0.01  -0.09
     4   1     0.00   0.00   0.01    -0.05  -0.16   0.28     0.02  -0.10   0.22
     5   6     0.00   0.00   0.01     0.04   0.09  -0.20    -0.04  -0.03   0.07
     6   1     0.00   0.00   0.01     0.01   0.00  -0.07    -0.04  -0.16   0.40
     7   6     0.00   0.00   0.00     0.04   0.08  -0.16    -0.03   0.04  -0.13
     8   1    -0.01   0.00   0.01     0.06   0.16  -0.35    -0.07  -0.04   0.13
     9   6     0.00   0.00   0.00     0.00   0.00   0.03     0.00   0.05  -0.19
    10   1     0.00   0.00   0.00    -0.04  -0.15   0.32     0.05   0.02  -0.14
    11   1    -0.01   0.00   0.00     0.07   0.15  -0.27    -0.04   0.07  -0.21
    12   6     0.00   0.00   0.00     0.00   0.01   0.05     0.00   0.04  -0.20
    13   6     0.00   0.00   0.00    -0.01  -0.01  -0.04     0.04   0.01  -0.18
    14   6     0.00   0.00  -0.01    -0.01  -0.01  -0.06     0.04   0.00   0.01
    15   1     0.00   0.00   0.00    -0.02  -0.03  -0.09     0.08   0.00  -0.27
    16   6     0.00   0.00  -0.01     0.00   0.02   0.13    -0.05   0.05  -0.07
    17   6     0.00   0.00  -0.01     0.00   0.03   0.13    -0.06   0.04   0.12
    18   1     0.00   0.00  -0.01    -0.01   0.04   0.18    -0.08   0.08  -0.08
    19   6     0.00   0.00  -0.01    -0.01   0.01   0.04    -0.02   0.01   0.18
    20   1     0.00   0.00  -0.01     0.00   0.01   0.03    -0.02   0.01   0.35
    21   1     0.00   0.00  -0.02     0.00   0.05   0.20    -0.10   0.05   0.24
    22   6     0.01   0.00   0.02    -0.01  -0.04  -0.19     0.09  -0.04   0.07
    23   1    -0.17   0.01  -0.52    -0.01  -0.03  -0.29     0.14  -0.02   0.11
    24   1    -0.25   0.31   0.43     0.00   0.02  -0.19     0.09  -0.11   0.07
    25   1     0.47  -0.32   0.17    -0.02  -0.16  -0.19     0.10  -0.01   0.07
                     4                      5                      6
                     A                      A                      A
 Frequencies --   111.5604               212.3766               250.2831
 Red. masses --     3.9383                 3.0814                 3.8148
 Frc consts  --     0.0289                 0.0819                 0.1408
 IR Inten    --     0.1949                 1.7451                 0.0774
  Atom  AN      X      Y      Z        X      Y      Z        X      Y      Z
     1   6     0.05   0.16   0.00    -0.01   0.00   0.03    -0.04   0.07  -0.16
     2   6     0.14   0.06   0.02     0.01   0.01  -0.01    -0.06  -0.02   0.02
     3   6     0.12  -0.09   0.00     0.01   0.00  -0.04    -0.07  -0.08   0.17
     4   1     0.24   0.10   0.03     0.02   0.01  -0.02    -0.06  -0.01  -0.02
     5   6    -0.08   0.10   0.00    -0.01   0.00   0.01    -0.04  -0.01   0.02
     6   1     0.06   0.28  -0.01    -0.01  -0.01   0.06    -0.02   0.17  -0.37
     7   6    -0.10  -0.05  -0.01    -0.01   0.00  -0.02    -0.05  -0.08   0.18
     8   1    -0.16   0.17   0.00    -0.02  -0.01   0.03    -0.02  -0.01  -0.02
     9   6     0.00  -0.13  -0.03     0.00   0.00  -0.03    -0.04  -0.04   0.11
    10   1     0.20  -0.16   0.01     0.01   0.01  -0.04    -0.09  -0.11   0.24
    11   1    -0.19  -0.09  -0.02    -0.03   0.00  -0.03    -0.07  -0.11   0.24
    12   6     0.00  -0.15  -0.07     0.00   0.00   0.01     0.00   0.03  -0.09
    13   6    -0.07  -0.10  -0.09     0.00   0.04   0.20     0.01   0.04  -0.15
    14   6    -0.06   0.03   0.00     0.00   0.04   0.16     0.02   0.04  -0.03
    15   1    -0.14  -0.14  -0.15     0.01   0.06   0.26     0.01   0.03  -0.20
    16   6     0.07  -0.10  -0.02     0.01  -0.05  -0.19     0.02   0.03  -0.15
    17   6     0.09   0.02   0.07     0.01  -0.01  -0.03     0.01   0.04  -0.03
    18   1     0.13  -0.15  -0.03     0.01  -0.11  -0.42     0.02   0.01  -0.20
    19   6     0.02   0.08   0.10     0.01   0.04   0.18     0.01   0.07   0.11
    20   1     0.03   0.17   0.19     0.01   0.06   0.22     0.01   0.11   0.28
    21   1     0.16   0.06   0.13     0.01  -0.03  -0.11     0.00   0.05   0.01
    22   6    -0.17   0.12   0.02    -0.02  -0.05  -0.20     0.18  -0.07   0.01
    23   1    -0.26   0.07   0.04     0.03   0.01  -0.39     0.34   0.01   0.02
    24   1    -0.16   0.19   0.02     0.08   0.09  -0.33     0.15  -0.24   0.04
    25   1    -0.16   0.17   0.02    -0.18  -0.34  -0.24     0.21  -0.10   0.02
                     7                      8                      9
                     A                      A                      A
 Frequencies --   294.2141               328.2153               394.7190
 Red. masses --     4.6115                 4.1581                 3.1411
 Frc consts  --     0.2352                 0.2639                 0.2883
 IR Inten    --     0.0757                 0.2251                 0.6852
  Atom  AN      X      Y      Z        X      Y      Z        X      Y      Z
     1   6     0.17  -0.05  -0.05    -0.14  -0.03   0.00     0.00  -0.07   0.10
     2   6     0.08   0.01   0.01    -0.17   0.01  -0.01    -0.02   0.04  -0.05
     3   6     0.08   0.08   0.10    -0.13   0.11   0.02    -0.01   0.10  -0.04
     4   1    -0.02  -0.02  -0.03    -0.22   0.00  -0.02    -0.05   0.07  -0.13
     5   6     0.21  -0.06   0.02    -0.02   0.04  -0.01     0.05   0.03  -0.05
     6   1     0.17  -0.07  -0.13    -0.15  -0.10  -0.01    -0.02  -0.16   0.21
     7   6     0.19   0.01   0.08    -0.01   0.13   0.04     0.05   0.08  -0.04
     8   1     0.24  -0.08   0.01     0.06  -0.01  -0.05     0.09   0.05  -0.13
     9   6     0.07   0.09   0.08    -0.01   0.11   0.07     0.00   0.01   0.12
    10   1     0.06   0.08   0.12    -0.22   0.20   0.00    -0.03   0.17  -0.13
    11   1     0.29   0.05   0.11     0.03   0.14   0.04     0.10   0.15  -0.12
    12   6    -0.02   0.03  -0.05     0.04  -0.04   0.00    -0.02  -0.09   0.11
    13   6    -0.05  -0.01  -0.13     0.12  -0.14  -0.09    -0.13  -0.05  -0.10
    14   6    -0.07  -0.04  -0.02     0.13  -0.11  -0.02    -0.12   0.06  -0.02
    15   1    -0.04  -0.02  -0.18     0.17  -0.13  -0.13    -0.24  -0.13  -0.22
    16   6    -0.14  -0.02  -0.12     0.09  -0.06  -0.07     0.06  -0.10   0.02
    17   6    -0.16  -0.05  -0.03     0.10  -0.06  -0.01     0.08   0.00  -0.10
    18   1    -0.20   0.03  -0.16     0.11  -0.09  -0.09     0.13  -0.16   0.00
    19   6    -0.13  -0.03   0.11     0.17  -0.08   0.10    -0.04   0.12   0.06
    20   1    -0.14  -0.04   0.27     0.16  -0.07   0.23    -0.03   0.26   0.13
    21   1    -0.19  -0.06  -0.02     0.06  -0.08   0.00     0.19   0.01  -0.21
    22   6    -0.18   0.04   0.00    -0.11   0.09  -0.01     0.06  -0.10   0.03
    23   1    -0.31  -0.03   0.00    -0.38  -0.05   0.02     0.31   0.02   0.02
    24   1    -0.18   0.16   0.00    -0.09   0.33  -0.03     0.02  -0.35   0.07
    25   1    -0.18   0.08   0.00    -0.13   0.21  -0.02     0.12  -0.17   0.05
                    10                     11                     12
                     A                      A                      A
 Frequencies --   413.9257               452.8139               510.6025
 Red. masses --     2.9609                 2.9460                 3.7414
 Frc consts  --     0.2989                 0.3559                 0.5747
 IR Inten    --     0.2355                 4.1082                 3.0064
  Atom  AN      X      Y      Z        X      Y      Z        X      Y      Z
     1   6     0.01   0.00   0.00     0.00  -0.02   0.01     0.01   0.05  -0.14
     2   6    -0.01  -0.10   0.18    -0.02   0.01   0.00    -0.04  -0.03   0.09
     3   6     0.03   0.09  -0.19    -0.01   0.05   0.00    -0.02   0.07   0.02
     4   1    -0.03  -0.21   0.40    -0.04   0.00  -0.01    -0.11  -0.15   0.29
     5   6     0.02   0.09  -0.18     0.03   0.01  -0.01     0.03  -0.04   0.10
     6   1     0.01   0.00   0.00     0.00  -0.04   0.01     0.02   0.05  -0.22
     7   6    -0.02  -0.10   0.19     0.02   0.03   0.03     0.03   0.06   0.02
     8   1     0.05   0.20  -0.39     0.06   0.01  -0.05     0.04  -0.18   0.30
     9   6     0.00   0.00   0.00     0.01   0.03   0.03     0.02   0.15  -0.18
    10   1     0.05   0.20  -0.40    -0.04   0.09  -0.02    -0.07  -0.01   0.21
    11   1    -0.05  -0.22   0.40     0.05   0.04   0.03     0.06  -0.02   0.21
    12   6     0.00   0.01   0.00    -0.01  -0.06  -0.06    -0.01  -0.03  -0.12
    13   6     0.00   0.00   0.00    -0.04   0.01   0.13    -0.08   0.00   0.00
    14   6     0.00   0.00   0.02    -0.04  -0.03  -0.20    -0.12  -0.02   0.13
    15   1     0.01   0.00  -0.02    -0.07   0.08   0.46    -0.08   0.00  -0.01
    16   6     0.00   0.01   0.01     0.02  -0.08  -0.17     0.11   0.02   0.04
    17   6    -0.01   0.00  -0.02     0.03   0.05   0.22     0.13   0.00   0.00
    18   1     0.00   0.01   0.01     0.04  -0.13  -0.26     0.16   0.00   0.15
    19   6     0.00   0.00   0.01    -0.01   0.01  -0.09     0.04   0.02  -0.06
    20   1     0.00   0.00   0.00    -0.01   0.07  -0.03     0.07   0.16  -0.23
    21   1    -0.01  -0.01  -0.04     0.07   0.15   0.57     0.14   0.01   0.01
    22   6     0.00   0.00   0.00     0.01  -0.03   0.02    -0.11  -0.17   0.05
    23   1     0.00   0.00  -0.01     0.03  -0.04   0.13     0.02  -0.09  -0.04
    24   1     0.00   0.00  -0.01    -0.08  -0.17   0.14    -0.08  -0.22  -0.01
    25   1    -0.02  -0.02   0.00     0.16   0.14   0.06    -0.17  -0.33   0.03
                    13                     14                     15
                     A                      A                      A
 Frequencies --   533.4930               585.7968               626.6012
 Red. masses --     4.5126                 3.5358                 6.7772
 Frc consts  --     0.7567                 0.7149                 1.5678
 IR Inten    --     1.8111                 4.2919                 4.5598
  Atom  AN      X      Y      Z        X      Y      Z        X      Y      Z
     1   6     0.02  -0.03   0.10     0.02   0.07  -0.08    -0.21   0.10   0.04
     2   6     0.03   0.05  -0.06    -0.01  -0.01   0.08    -0.15   0.03  -0.01
     3   6     0.00  -0.05   0.00    -0.02  -0.03  -0.07    -0.15  -0.22  -0.12
     4   1     0.07   0.14  -0.23     0.01  -0.11   0.31     0.13   0.14   0.04
     5   6     0.00   0.03  -0.07     0.00  -0.02   0.08     0.18   0.23   0.13
     6   1     0.02  -0.03   0.14     0.02   0.04  -0.06    -0.23  -0.11  -0.09
     7   6    -0.01  -0.07  -0.02     0.01  -0.04  -0.07     0.16  -0.01   0.03
     8   1    -0.03   0.15  -0.23    -0.07  -0.10   0.31     0.27   0.19   0.07
     9   6    -0.04  -0.11   0.12     0.00   0.02  -0.14     0.21  -0.11  -0.03
    10   1     0.06   0.00  -0.16     0.01  -0.15   0.09    -0.22  -0.16  -0.11
    11   1    -0.01   0.01  -0.17    -0.05  -0.15   0.09    -0.10  -0.08  -0.08
    12   6    -0.01   0.18  -0.01    -0.01   0.07   0.27     0.21   0.02  -0.03
    13   6    -0.03   0.14  -0.03    -0.01   0.02   0.05     0.00   0.17  -0.05
    14   6    -0.08  -0.15  -0.01    -0.02  -0.07  -0.24    -0.06   0.06   0.01
    15   1     0.18   0.22  -0.02     0.01   0.00  -0.02    -0.10   0.14  -0.04
    16   6     0.13   0.24  -0.07     0.01   0.03   0.00     0.06  -0.07   0.01
    17   6     0.09   0.01   0.01     0.01  -0.01  -0.07     0.01  -0.20   0.06
    18   1     0.08   0.27  -0.09     0.02  -0.05  -0.27    -0.13   0.09  -0.01
    19   6     0.11  -0.06   0.02     0.01   0.03   0.13    -0.19  -0.04  -0.01
    20   1     0.13   0.09   0.04     0.02   0.10   0.37    -0.17   0.05  -0.06
    21   1    -0.09  -0.05   0.05    -0.01  -0.06  -0.22     0.11  -0.16   0.06
    22   6    -0.18  -0.20   0.06    -0.02  -0.02  -0.01    -0.02   0.02   0.00
    23   1    -0.24  -0.23   0.09    -0.08  -0.08   0.17    -0.03   0.02  -0.03
    24   1    -0.19  -0.16   0.07    -0.14  -0.14   0.16    -0.01   0.05  -0.02
    25   1    -0.16  -0.13   0.06     0.19   0.26   0.05    -0.05  -0.01  -0.01
                    16                     17                     18
                     A                      A                      A
 Frequencies --   631.7517               711.0781               714.4957
 Red. masses --     6.4315                 1.7662                 2.2967
 Frc consts  --     1.5124                 0.5262                 0.6908
 IR Inten    --     2.0598                31.8455                15.3314
  Atom  AN      X      Y      Z        X      Y      Z        X      Y      Z
     1   6     0.16   0.07   0.07     0.02   0.03  -0.06     0.00   0.02  -0.04
     2   6    -0.17   0.30   0.12    -0.02  -0.05   0.13     0.01  -0.03   0.02
     3   6    -0.22  -0.02  -0.02     0.00   0.04  -0.06     0.01   0.00  -0.04
     4   1    -0.18   0.31   0.08     0.01   0.10  -0.16     0.02  -0.05   0.08
     5   6     0.23   0.06   0.04    -0.02  -0.07   0.12    -0.01  -0.01   0.03
     6   1     0.12  -0.24  -0.10     0.07   0.26  -0.52     0.00   0.03  -0.02
     7   6     0.14  -0.26  -0.10     0.00   0.02  -0.07     0.00   0.02  -0.03
     8   1     0.01   0.23   0.07     0.00   0.09  -0.17    -0.01  -0.04   0.08
     9   6    -0.16  -0.07  -0.05    -0.02  -0.05   0.09     0.00  -0.02   0.03
    10   1     0.00  -0.17  -0.09     0.05   0.24  -0.44     0.02   0.00  -0.04
    11   1     0.15  -0.26  -0.11     0.06   0.23  -0.44    -0.02   0.01  -0.04
    12   6    -0.14  -0.04  -0.03     0.00   0.00  -0.03     0.00   0.05   0.18
    13   6     0.00  -0.14   0.01     0.00   0.01   0.01     0.00  -0.02  -0.11
    14   6     0.05  -0.01   0.06     0.00   0.00  -0.01     0.00   0.02   0.11
    15   1     0.04  -0.13  -0.01     0.01   0.03   0.06     0.01  -0.11  -0.49
    16   6    -0.05   0.01  -0.03     0.01   0.00   0.01     0.00  -0.01  -0.11
    17   6    -0.02   0.13   0.00     0.01  -0.03  -0.01    -0.01   0.05   0.16
    18   1     0.09  -0.09   0.04    -0.01   0.04   0.09    -0.01  -0.13  -0.56
    19   6     0.11   0.01  -0.04    -0.01  -0.01   0.01     0.01  -0.02  -0.10
    20   1     0.10  -0.08  -0.08     0.00   0.01   0.06     0.00  -0.13  -0.48
    21   1    -0.06   0.12   0.05     0.01  -0.01   0.04    -0.03  -0.02  -0.09
    22   6     0.04   0.01   0.00     0.01   0.01   0.00     0.00   0.00   0.02
    23   1     0.06   0.03  -0.03     0.01   0.01  -0.01     0.01   0.01  -0.02
    24   1     0.07   0.03  -0.04     0.01   0.01  -0.01     0.03   0.04  -0.03
    25   1    -0.01  -0.05  -0.01     0.01   0.01   0.00    -0.07  -0.08   0.00
                    19                     20                     21
                     A                      A                      A
 Frequencies --   723.1380               766.8791               803.6073
 Red. masses --     5.5193                 1.6574                 1.6324
 Frc consts  --     1.7005                 0.5743                 0.6211
 IR Inten    --     1.6981                67.4448                11.6432
  Atom  AN      X      Y      Z        X      Y      Z        X      Y      Z
     1   6    -0.16   0.03   0.00     0.00  -0.05   0.09     0.00   0.02  -0.05
     2   6     0.03  -0.15  -0.05     0.00   0.01   0.00     0.00   0.00   0.00
     3   6     0.03  -0.15  -0.06    -0.01  -0.02   0.08     0.00   0.01  -0.02
     4   1     0.26  -0.01  -0.12     0.02   0.21  -0.41    -0.02  -0.09   0.17
     5   6     0.08   0.12   0.10     0.00  -0.01  -0.01     0.02   0.01   0.01
     6   1    -0.15   0.10  -0.16     0.05   0.19  -0.39    -0.03  -0.13   0.20
     7   6     0.07   0.10   0.06    -0.01  -0.03   0.07     0.01   0.02  -0.01
     8   1     0.26   0.07  -0.08     0.04   0.20  -0.41     0.01  -0.09   0.18
     9   6     0.13  -0.03   0.01     0.01   0.08  -0.15    -0.01  -0.05   0.09
    10   1    -0.06  -0.02  -0.14     0.01   0.05  -0.06    -0.01   0.02  -0.03
    11   1    -0.05   0.13  -0.09     0.00   0.04  -0.06     0.01   0.03  -0.03
    12   6    -0.04  -0.04   0.00     0.01   0.00   0.00    -0.01  -0.03  -0.13
    13   6     0.06  -0.18   0.05     0.00   0.00   0.02    -0.01   0.00   0.03
    14   6     0.04  -0.04  -0.01    -0.01   0.00  -0.03     0.00  -0.02  -0.05
    15   1     0.07  -0.17   0.09    -0.01  -0.04  -0.10     0.00   0.03   0.12
    16   6    -0.14   0.04   0.00     0.00  -0.01   0.05     0.00   0.03   0.08
    17   6    -0.13   0.34  -0.10     0.01   0.00   0.04    -0.01   0.02   0.05
    18   1     0.02  -0.06   0.09     0.00  -0.10  -0.31     0.00  -0.07  -0.31
    19   6     0.11   0.11  -0.02    -0.01   0.02   0.04     0.01   0.02   0.10
    20   1     0.08  -0.04   0.10     0.00  -0.03  -0.25     0.01  -0.13  -0.49
    21   1    -0.15   0.35  -0.05     0.04  -0.08  -0.34    -0.02  -0.15  -0.61
    22   6    -0.09  -0.13   0.04     0.00  -0.01  -0.01     0.01   0.00  -0.02
    23   1    -0.05  -0.12   0.03    -0.01  -0.02   0.05    -0.03  -0.03   0.06
    24   1    -0.09  -0.19   0.04    -0.04  -0.04   0.05    -0.05  -0.03   0.06
    25   1    -0.08  -0.16   0.04     0.06   0.07   0.01     0.09   0.12   0.00
                    22                     23                     24
                     A                      A                      A
 Frequencies --   854.3754               868.0708               898.2030
 Red. masses --     1.2530                 4.1835                 1.3176
 Frc consts  --     0.5389                 1.8574                 0.6263
 IR Inten    --     0.4212                 2.9340                 3.0403
  Atom  AN      X      Y      Z        X      Y      Z        X      Y      Z
     1   6    -0.01   0.00   0.00     0.06   0.01  -0.02     0.00  -0.01   0.02
     2   6     0.01   0.03  -0.07    -0.06   0.12   0.03     0.01  -0.01   0.00
     3   6     0.01   0.03  -0.07    -0.02   0.06   0.02     0.00   0.00  -0.02
     4   1    -0.04  -0.22   0.42    -0.19   0.01   0.14     0.03   0.01  -0.04
     5   6     0.00  -0.03   0.07    -0.10  -0.09  -0.05     0.01   0.01   0.00
     6   1    -0.01   0.00  -0.01     0.04  -0.05   0.11     0.01   0.05  -0.08
     7   6     0.00  -0.03   0.07    -0.05  -0.08  -0.03     0.00   0.01  -0.01
     8   1     0.06   0.22  -0.43    -0.22   0.01  -0.06     0.01   0.01   0.00
     9   6     0.00   0.00   0.00     0.05  -0.02   0.03    -0.01   0.00   0.00
    10   1    -0.05  -0.24   0.44    -0.01   0.06   0.03    -0.02  -0.04   0.07
    11   1     0.05   0.24  -0.44    -0.03  -0.01  -0.18    -0.01  -0.04   0.08
    12   6    -0.01   0.00   0.00     0.22   0.00   0.01    -0.01   0.01   0.03
    13   6    -0.01   0.00   0.00     0.21   0.05  -0.05    -0.02  -0.04  -0.13
    14   6     0.00   0.00   0.00     0.08   0.05  -0.02    -0.01   0.00   0.02
    15   1    -0.02   0.00   0.00     0.22   0.11   0.19    -0.02   0.19   0.77
    16   6     0.00   0.01   0.00    -0.04  -0.14   0.05     0.01   0.03   0.06
    17   6     0.00  -0.01   0.00    -0.04   0.11  -0.02     0.00   0.00   0.03
    18   1     0.00   0.01   0.00    -0.09  -0.13  -0.08     0.00  -0.08  -0.36
    19   6     0.01  -0.01   0.00    -0.14   0.13  -0.03     0.01  -0.02  -0.05
    20   1     0.01   0.00   0.01    -0.16   0.06   0.02     0.01   0.06   0.29
    21   1    -0.01  -0.01   0.01     0.32   0.23  -0.13    -0.02  -0.06  -0.16
    22   6     0.01   0.01   0.00    -0.12  -0.17   0.06     0.01   0.02   0.03
    23   1     0.01   0.01   0.00    -0.27  -0.24   0.03     0.05   0.06  -0.10
    24   1     0.01   0.01   0.00    -0.08  -0.04   0.00     0.09   0.06  -0.09
    25   1     0.01   0.01   0.00    -0.22  -0.17   0.03    -0.11  -0.15  -0.01
                    25                     26                     27
                     A                      A                      A
 Frequencies --   912.5365               932.9991               976.5435
 Red. masses --     1.3607                 1.4930                 1.3650
 Frc consts  --     0.6676                 0.7657                 0.7669
 IR Inten    --     2.4534                 1.2433                 0.3964
  Atom  AN      X      Y      Z        X      Y      Z        X      Y      Z
     1   6     0.01   0.02  -0.05     0.01   0.04  -0.07     0.01   0.00   0.00
     2   6     0.00   0.00   0.00     0.01  -0.01  -0.01     0.01   0.04  -0.08
     3   6     0.00  -0.02   0.04    -0.01  -0.05   0.07    -0.02  -0.05   0.07
     4   1    -0.01  -0.02   0.03     0.03   0.00  -0.01    -0.04  -0.23   0.44
     5   6     0.01   0.01   0.00     0.00   0.00   0.00    -0.01  -0.04   0.08
     6   1    -0.03  -0.15   0.26    -0.04  -0.20   0.45     0.01   0.00   0.00
     7   6     0.00  -0.01   0.05    -0.01  -0.04   0.08     0.00   0.05  -0.07
     8   1     0.01  -0.02   0.04    -0.01   0.01   0.00     0.05   0.23  -0.44
     9   6     0.00   0.00  -0.01     0.00   0.04  -0.07     0.00   0.00   0.00
    10   1     0.04   0.13  -0.25     0.04   0.22  -0.42     0.04   0.22  -0.42
    11   1     0.02   0.14  -0.24     0.06   0.23  -0.42    -0.05  -0.21   0.42
    12   6     0.00  -0.01  -0.05    -0.01   0.02   0.06     0.00   0.00   0.00
    13   6     0.00   0.01   0.06    -0.01  -0.03  -0.06     0.00  -0.01   0.00
    14   6     0.00   0.00   0.00    -0.01   0.00   0.00     0.00   0.00   0.00
    15   1     0.00  -0.09  -0.34     0.00   0.07   0.32     0.01  -0.01   0.00
    16   6     0.00   0.02   0.09     0.00  -0.01  -0.05     0.01   0.01  -0.01
    17   6     0.00  -0.01  -0.01     0.01  -0.01   0.00     0.00   0.00   0.02
    18   1    -0.01  -0.13  -0.52    -0.01   0.07   0.26     0.01   0.02   0.05
    19   6     0.00  -0.02  -0.09     0.01   0.01   0.04    -0.01   0.00  -0.01
    20   1     0.00   0.13   0.53     0.01  -0.04  -0.26    -0.01   0.01   0.06
    21   1     0.00   0.00   0.03     0.01  -0.01   0.02     0.00  -0.03  -0.10
    22   6     0.00   0.01   0.00     0.00   0.01   0.00     0.00   0.00   0.00
    23   1     0.03   0.02  -0.01     0.04   0.03  -0.02     0.01   0.01   0.00
    24   1     0.01   0.00  -0.01     0.00  -0.02   0.00     0.00  -0.01   0.00
    25   1    -0.01  -0.03   0.00     0.00  -0.01   0.00     0.00  -0.01   0.00
                    28                     29                     30
                     A                      A                      A
 Frequencies --   981.1863               994.9973              1001.8008
 Red. masses --     1.3100                 1.2694                 1.5560
 Frc consts  --     0.7430                 0.7404                 0.9200
 IR Inten    --     0.2497                 0.0844                 0.8021
  Atom  AN      X      Y      Z        X      Y      Z        X      Y      Z
     1   6    -0.01   0.00   0.00    -0.01  -0.04   0.08    -0.03   0.01  -0.01
     2   6     0.00   0.00   0.01     0.01   0.04  -0.07    -0.02   0.03   0.03
     3   6     0.00   0.01   0.00    -0.01  -0.02   0.03     0.02   0.03   0.01
     4   1     0.01   0.03  -0.05    -0.04  -0.23   0.45    -0.03   0.07  -0.05
     5   6     0.00   0.00  -0.01     0.00   0.03  -0.07    -0.03  -0.04  -0.01
     6   1    -0.01   0.01   0.01     0.05   0.25  -0.49    -0.04  -0.02   0.06
     7   6     0.00  -0.02   0.01     0.00  -0.02   0.03     0.01  -0.03  -0.03
     8   1    -0.01  -0.03   0.05    -0.06  -0.23   0.45    -0.04   0.01  -0.08
     9   6     0.00   0.00   0.00     0.00   0.00   0.00     0.05  -0.01   0.01
    10   1     0.00  -0.01   0.05     0.02   0.13  -0.24     0.01   0.01   0.08
    11   1     0.02   0.03  -0.06     0.03   0.13  -0.24    -0.01  -0.08   0.03
    12   6     0.00   0.00   0.00     0.00   0.00   0.01     0.06  -0.01   0.00
    13   6     0.00   0.01   0.02     0.01  -0.01   0.00     0.05  -0.05   0.01
    14   6     0.00   0.00  -0.01    -0.01   0.01   0.00    -0.03   0.04  -0.01
    15   1     0.00  -0.01  -0.08     0.02   0.00   0.01     0.04  -0.06   0.03
    16   6    -0.01  -0.03  -0.07     0.00   0.00   0.00    -0.02   0.04   0.00
    17   6     0.00   0.03   0.12     0.00  -0.01   0.00    -0.01  -0.02   0.00
    18   1    -0.01   0.12   0.46    -0.02   0.02   0.00    -0.12   0.11  -0.06
    19   6     0.01  -0.02  -0.07     0.01   0.00   0.00     0.05  -0.03   0.01
    20   1     0.01   0.09   0.42     0.01   0.00  -0.02     0.04  -0.08  -0.02
    21   1     0.01  -0.17  -0.72    -0.01  -0.01   0.01    -0.13  -0.06   0.05
    22   6    -0.01   0.00   0.00    -0.01   0.01   0.00    -0.11   0.08  -0.02
    23   1     0.02   0.02  -0.01     0.07   0.05  -0.01     0.51   0.39  -0.05
    24   1     0.00  -0.02  -0.01    -0.03  -0.07   0.01    -0.21  -0.56   0.07
    25   1    -0.01  -0.03   0.00     0.02  -0.03   0.01     0.16  -0.23   0.07
                    31                     32                     33
                     A                      A                      A
 Frequencies --  1007.2575              1011.2787              1042.3091
 Red. masses --     5.7521                 5.6359                 2.6291
 Frc consts  --     3.4384                 3.3959                 1.6829
 IR Inten    --     0.4364                 0.0619                 3.6546
  Atom  AN      X      Y      Z        X      Y      Z        X      Y      Z
     1   6     0.22  -0.03   0.01     0.27  -0.04   0.01    -0.13   0.02  -0.01
     2   6    -0.01   0.04   0.02    -0.02   0.05   0.04    -0.03   0.19   0.09
     3   6    -0.13  -0.16  -0.10    -0.17  -0.20  -0.15     0.04  -0.05  -0.01
     4   1     0.00   0.03   0.01     0.02   0.09  -0.05     0.27   0.30   0.20
     5   6    -0.02  -0.03  -0.02    -0.03  -0.04  -0.04    -0.07  -0.17  -0.10
     6   1     0.22  -0.04   0.02     0.28  -0.05   0.02    -0.15   0.01  -0.01
     7   6    -0.08   0.19   0.08    -0.11   0.25   0.13     0.06   0.04   0.03
     8   1     0.00  -0.02  -0.03    -0.01  -0.08   0.02     0.19  -0.38  -0.17
     9   6     0.02   0.00   0.00     0.01   0.00   0.00     0.09  -0.01  -0.01
    10   1    -0.11  -0.18  -0.11    -0.12  -0.33  -0.03     0.27  -0.17  -0.12
    11   1    -0.06   0.19   0.13    -0.03   0.33   0.05     0.32   0.13   0.09
    12   6     0.03   0.00   0.00     0.01   0.00   0.00     0.04  -0.03   0.01
    13   6    -0.08   0.27  -0.06     0.09  -0.22   0.05    -0.08   0.00   0.00
    14   6    -0.01  -0.01  -0.02     0.01   0.02   0.01    -0.02  -0.03   0.00
    15   1    -0.05   0.28  -0.09     0.07  -0.24   0.02    -0.23  -0.05   0.04
    16   6    -0.19  -0.23   0.06     0.13   0.17  -0.06     0.03   0.03  -0.01
    17   6    -0.01   0.03  -0.01     0.01  -0.03   0.02    -0.04   0.04  -0.01
    18   1    -0.19  -0.25   0.04     0.07   0.26   0.04     0.07   0.01  -0.01
    19   6     0.30  -0.06   0.02    -0.21   0.03  -0.02     0.02  -0.02   0.01
    20   1     0.31  -0.11  -0.02    -0.21   0.07   0.04     0.02  -0.07   0.01
    21   1    -0.01   0.02   0.02    -0.01  -0.05  -0.06    -0.20  -0.01   0.00
    22   6    -0.05   0.02   0.01    -0.02   0.01  -0.02     0.05   0.00   0.01
    23   1     0.18   0.14  -0.05     0.07   0.04   0.04    -0.12  -0.08  -0.01
    24   1    -0.04  -0.16  -0.01    -0.08  -0.14   0.06     0.10   0.20  -0.04
    25   1     0.00  -0.14   0.03     0.09   0.02   0.01    -0.05   0.06  -0.03
                    34                     35                     36
                     A                      A                      A
 Frequencies --  1054.8622              1069.8687              1098.5454
 Red. masses --     1.5411                 2.0278                 1.5900
 Frc consts  --     1.0104                 1.3675                 1.1305
 IR Inten    --     7.6253                 2.0543                 5.0807
  Atom  AN      X      Y      Z        X      Y      Z        X      Y      Z
     1   6    -0.01   0.00   0.00     0.09  -0.02   0.00     0.01   0.08   0.04
     2   6     0.00   0.01   0.00    -0.05  -0.01  -0.01     0.04  -0.06  -0.02
     3   6     0.00   0.00   0.00    -0.01   0.05   0.03    -0.11  -0.02  -0.03
     4   1     0.03   0.01   0.01    -0.33  -0.10  -0.08     0.26   0.01   0.02
     5   6     0.00  -0.01   0.00    -0.04   0.03   0.01    -0.07  -0.04  -0.03
     6   1    -0.01   0.01   0.00     0.09  -0.05  -0.02     0.07   0.50   0.27
     7   6     0.01   0.00   0.00    -0.03  -0.03  -0.01     0.10  -0.06  -0.02
     8   1     0.01  -0.02  -0.01    -0.25   0.18   0.07    -0.27   0.10   0.01
     9   6     0.00   0.00   0.00     0.14  -0.03  -0.01     0.02   0.05   0.03
    10   1     0.01  -0.01   0.00    -0.23   0.23   0.05    -0.44   0.19   0.08
    11   1     0.02   0.00   0.01    -0.30  -0.10  -0.13     0.45   0.04   0.09
    12   6     0.00   0.00   0.00     0.12  -0.06   0.02     0.01   0.01  -0.02
    13   6     0.00   0.01  -0.04    -0.10  -0.01   0.00    -0.01  -0.02   0.01
    14   6     0.00   0.03   0.14    -0.04  -0.02   0.02     0.00   0.00   0.00
    15   1     0.03   0.07   0.17    -0.45  -0.14   0.06    -0.08  -0.06  -0.03
    16   6    -0.01  -0.02   0.01     0.05   0.06  -0.01     0.00   0.00   0.01
    17   6     0.00   0.00   0.00    -0.07   0.07  -0.02     0.00  -0.01   0.00
    18   1    -0.01  -0.03  -0.02     0.07   0.07   0.01     0.00  -0.02  -0.04
    19   6     0.01  -0.01  -0.04     0.04  -0.05   0.01     0.01   0.01   0.00
    20   1     0.02   0.04   0.14     0.01  -0.18   0.06     0.02   0.05  -0.01
    21   1     0.02   0.01   0.02    -0.37  -0.03   0.00    -0.02  -0.02   0.01
    22   6    -0.01  -0.04  -0.15     0.05   0.00  -0.01     0.01   0.00   0.00
    23   1    -0.10  -0.17   0.35    -0.09  -0.07   0.02    -0.01  -0.01   0.00
    24   1    -0.32  -0.19   0.32     0.05   0.13   0.00     0.01   0.02   0.00
    25   1     0.45   0.54  -0.01     0.01   0.11  -0.02     0.00   0.01   0.00
                    37                     38                     39
                     A                      A                      A
 Frequencies --  1116.2766              1176.7586              1189.9351
 Red. masses --     1.5377                 1.1063                 1.1385
 Frc consts  --     1.1289                 0.9026                 0.9498
 IR Inten    --     4.3397                 0.0191                 0.1151
  Atom  AN      X      Y      Z        X      Y      Z        X      Y      Z
     1   6     0.00   0.00   0.00     0.01   0.06   0.03     0.00   0.00   0.00
     2   6    -0.01   0.01   0.01    -0.04  -0.01  -0.01    -0.01  -0.01   0.00
     3   6     0.01   0.00   0.00     0.01  -0.01   0.00     0.01  -0.01   0.00
     4   1    -0.04   0.01   0.00    -0.45  -0.15  -0.12    -0.09  -0.04  -0.03
     5   6    -0.01  -0.01   0.00     0.04  -0.03  -0.01     0.00   0.01   0.00
     6   1     0.00  -0.03  -0.02     0.08   0.59   0.30     0.00   0.00   0.00
     7   6    -0.01   0.00  -0.01    -0.01  -0.01   0.00     0.00   0.00   0.00
     8   1     0.00  -0.01  -0.01     0.39  -0.28  -0.09    -0.06   0.05   0.02
     9   6     0.03  -0.01   0.01     0.00   0.00   0.00    -0.01   0.00   0.00
    10   1     0.01   0.00   0.01     0.14  -0.10  -0.04     0.11  -0.08  -0.03
    11   1    -0.11  -0.06   0.00    -0.17  -0.06  -0.05     0.10   0.04   0.02
    12   6     0.02   0.02   0.00     0.00   0.00   0.00     0.00   0.00   0.00
    13   6     0.00  -0.07   0.02     0.00   0.00   0.00     0.03   0.01   0.00
    14   6    -0.01   0.02  -0.01     0.00   0.00   0.00     0.02   0.01   0.00
    15   1    -0.13  -0.13   0.03     0.00   0.00   0.01     0.13   0.05  -0.01
    16   6    -0.10   0.02   0.00     0.00   0.00   0.00     0.04  -0.03   0.01
    17   6     0.02  -0.10   0.02     0.00   0.00   0.00    -0.06  -0.03   0.01
    18   1    -0.53   0.34  -0.09     0.00   0.00   0.01     0.39  -0.30   0.08
    19   6     0.08   0.09  -0.02     0.00   0.00   0.00     0.00   0.04  -0.01
    20   1     0.17   0.61  -0.14     0.00  -0.01   0.00     0.06   0.42  -0.10
    21   1    -0.05  -0.13   0.03     0.01   0.01   0.00    -0.65  -0.25   0.05
    22   6     0.03  -0.04   0.01     0.00   0.00   0.00    -0.01  -0.01   0.00
    23   1    -0.12  -0.11   0.01     0.00   0.00   0.00     0.00   0.00   0.00
    24   1     0.04   0.12   0.00     0.00   0.00   0.00    -0.02  -0.02   0.01
    25   1    -0.06   0.05  -0.02     0.00   0.00   0.00    -0.01  -0.02   0.00
                    40                     41                     42
                     A                      A                      A
 Frequencies --  1200.5548              1206.2997              1293.7741
 Red. masses --     1.1650                 1.9063                 2.4567
 Frc consts  --     0.9893                 1.6344                 2.4228
 IR Inten    --     0.3020                 0.2222                 1.1155
  Atom  AN      X      Y      Z        X      Y      Z        X      Y      Z
     1   6     0.01   0.00   0.00    -0.01   0.00   0.00     0.00   0.04   0.02
     2   6     0.05   0.01   0.01     0.01  -0.03  -0.01    -0.06  -0.03  -0.02
     3   6    -0.05   0.03   0.01     0.00   0.00   0.00     0.04  -0.05  -0.03
     4   1     0.45   0.15   0.12    -0.01  -0.04  -0.02     0.19   0.04   0.05
     5   6     0.04  -0.03  -0.01     0.02   0.02   0.01     0.05  -0.05  -0.02
     6   1     0.01   0.00   0.00    -0.01   0.01   0.00    -0.01  -0.07  -0.04
     7   6    -0.05  -0.01  -0.01     0.00   0.01   0.00    -0.05  -0.04  -0.03
     8   1     0.40  -0.28  -0.10     0.04   0.01   0.01    -0.17   0.10   0.04
     9   6    -0.01   0.00   0.00    -0.11   0.01  -0.01     0.02   0.15   0.09
    10   1    -0.38   0.26   0.10     0.18  -0.12  -0.07     0.26  -0.21  -0.09
    11   1    -0.44  -0.14  -0.13     0.21   0.09   0.06    -0.29  -0.12  -0.10
    12   6     0.00   0.00   0.00     0.03  -0.02   0.00     0.04   0.19  -0.05
    13   6     0.01   0.01   0.00     0.00   0.02   0.00    -0.07  -0.05   0.01
    14   6     0.02   0.03  -0.01     0.13   0.18  -0.04     0.07  -0.11   0.03
    15   1    -0.06  -0.02  -0.01    -0.66  -0.22   0.06    -0.49  -0.21   0.06
    16   6     0.02  -0.01   0.00     0.02   0.02  -0.01     0.03  -0.06   0.02
    17   6    -0.01  -0.01   0.00     0.00  -0.05   0.01    -0.07  -0.02   0.01
    18   1     0.09  -0.06   0.03    -0.06   0.09  -0.02     0.24  -0.22   0.05
    19   6     0.00   0.01   0.00     0.04   0.01   0.00     0.00   0.04  -0.01
    20   1     0.01   0.02  -0.01    -0.02  -0.40   0.09     0.01   0.12  -0.02
    21   1    -0.16  -0.07   0.01    -0.17  -0.12   0.03     0.32   0.12  -0.03
    22   6    -0.01  -0.01   0.00    -0.06  -0.08   0.02    -0.02   0.03  -0.01
    23   1    -0.01  -0.01   0.00    -0.15  -0.13   0.03     0.10   0.08   0.00
    24   1    -0.02  -0.03   0.01    -0.08  -0.14   0.04    -0.01  -0.08  -0.02
    25   1    -0.01  -0.02   0.00    -0.08  -0.10   0.01     0.09  -0.04   0.03
                    43                     44                     45
                     A                      A                      A
 Frequencies --  1308.0683              1323.2055              1336.6480
 Red. masses --     3.3706                 4.7597                 1.5866
 Frc consts  --     3.3980                 4.9100                 1.6701
 IR Inten    --     0.4295                 0.2489                 0.0522
  Atom  AN      X      Y      Z        X      Y      Z        X      Y      Z
     1   6    -0.01  -0.02  -0.01     0.02   0.13   0.06     0.00  -0.04  -0.02
     2   6     0.07  -0.04  -0.01    -0.14  -0.08  -0.06     0.01  -0.01  -0.01
     3   6    -0.07   0.06   0.02     0.08  -0.08  -0.03    -0.05   0.02   0.01
     4   1     0.16  -0.02   0.01     0.41   0.09   0.10     0.18   0.04   0.04
     5   6     0.03   0.06   0.04     0.15  -0.09  -0.03     0.00   0.00   0.00
     6   1     0.01   0.02   0.01    -0.01  -0.09  -0.05     0.02   0.13   0.07
     7   6    -0.03   0.00   0.00    -0.15  -0.07  -0.05     0.04   0.00   0.01
     8   1     0.31  -0.13  -0.03    -0.19   0.15   0.06    -0.12   0.08   0.03
     9   6    -0.24  -0.03  -0.04    -0.05   0.26   0.11    -0.01   0.04   0.01
    10   1     0.15  -0.11  -0.03     0.20  -0.18  -0.07     0.24  -0.19  -0.06
    11   1     0.34   0.14   0.10    -0.06  -0.03  -0.03    -0.24  -0.09  -0.07
    12   6     0.26  -0.03   0.01     0.07  -0.20   0.03     0.03   0.01  -0.01
    13   6     0.01   0.02   0.00     0.11   0.04  -0.01    -0.10  -0.04   0.01
    14   6    -0.06  -0.18   0.04    -0.18   0.08  -0.02     0.01   0.00   0.00
    15   1    -0.27  -0.10   0.03     0.22   0.07  -0.03     0.48   0.18  -0.05
    16   6     0.06  -0.03   0.00    -0.05   0.05  -0.01     0.10  -0.07   0.02
    17   6    -0.07   0.10  -0.02     0.11   0.08  -0.02    -0.04  -0.01   0.00
    18   1    -0.27   0.24  -0.05    -0.15   0.14  -0.04    -0.32   0.26  -0.06
    19   6    -0.02  -0.02   0.01    -0.01  -0.10   0.02     0.03   0.11  -0.03
    20   1     0.03   0.37  -0.09    -0.01  -0.07   0.02    -0.06  -0.41   0.10
    21   1    -0.07   0.12  -0.03    -0.38  -0.10   0.03    -0.26  -0.10   0.02
    22   6     0.01   0.05  -0.01     0.04  -0.02   0.00     0.01  -0.01   0.00
    23   1     0.17   0.13  -0.02    -0.06  -0.05  -0.03    -0.01  -0.01  -0.01
    24   1     0.05   0.06  -0.05     0.04   0.16   0.02     0.00   0.02   0.01
    25   1     0.13   0.06   0.02    -0.09   0.13  -0.04    -0.02   0.01   0.00
                    46                     47                     48
                     A                      A                      A
 Frequencies --  1350.6352              1406.5786              1435.5342
 Red. masses --     1.8331                 1.2532                 2.4215
 Frc consts  --     1.9702                 1.4608                 2.9401
 IR Inten    --     0.6820                 0.8604                 4.3888
  Atom  AN      X      Y      Z        X      Y      Z        X      Y      Z
     1   6     0.02   0.11   0.06     0.00   0.00   0.00    -0.01  -0.02  -0.01
     2   6    -0.04   0.00  -0.01     0.00   0.00   0.00    -0.09   0.00  -0.01
     3   6     0.11  -0.06  -0.02     0.00   0.00   0.00     0.05   0.00   0.01
     4   1    -0.23  -0.07  -0.06     0.01   0.00   0.00     0.17   0.10   0.07
     5   6     0.04  -0.02   0.00     0.00   0.00   0.00     0.08  -0.05  -0.01
     6   1    -0.04  -0.30  -0.16     0.00   0.00   0.00     0.03   0.26   0.13
     7   6    -0.12  -0.02  -0.03     0.00   0.00   0.00    -0.01   0.04   0.02
     8   1     0.21  -0.14  -0.04     0.00   0.00   0.00    -0.25   0.20   0.07
     9   6     0.00  -0.01  -0.01     0.00   0.00   0.00     0.02  -0.03  -0.03
    10   1    -0.41   0.31   0.12     0.01  -0.01   0.00    -0.04   0.09   0.02
    11   1     0.47   0.17   0.14     0.01   0.00   0.00    -0.07   0.03   0.00
    12   6     0.01   0.04   0.00     0.01   0.00   0.00    -0.10  -0.15   0.04
    13   6    -0.07  -0.02   0.01     0.00   0.00   0.00    -0.04   0.10  -0.02
    14   6     0.04  -0.03   0.00    -0.01  -0.02   0.00     0.19  -0.06   0.01
    15   1     0.22   0.08  -0.03     0.01   0.01   0.00    -0.06   0.11  -0.01
    16   6     0.06  -0.04   0.01     0.00   0.00   0.00     0.08   0.02   0.00
    17   6    -0.05  -0.02   0.00     0.00   0.01   0.00    -0.04   0.04  -0.01
    18   1    -0.16   0.13  -0.03    -0.02   0.01   0.00    -0.26   0.28  -0.06
    19   6     0.01   0.08  -0.02     0.00  -0.01   0.00    -0.06  -0.03   0.01
    20   1    -0.03  -0.17   0.04     0.01   0.04  -0.01     0.01   0.41  -0.10
    21   1    -0.06  -0.02   0.00     0.01   0.02  -0.01     0.03   0.08  -0.02
    22   6     0.00   0.00   0.00     0.09   0.11  -0.04    -0.07   0.03  -0.01
    23   1     0.02   0.01   0.00    -0.43  -0.22   0.24    -0.02   0.00   0.18
    24   1     0.00  -0.02   0.00    -0.21  -0.39   0.33     0.08  -0.11  -0.21
    25   1     0.02  -0.02   0.01    -0.34  -0.49  -0.13     0.32  -0.24   0.11
                    49                     50                     51
                     A                      A                      A
 Frequencies --  1471.6228              1486.1071              1494.1872
 Red. masses --     1.9666                 1.0504                 1.3475
 Frc consts  --     2.5094                 1.3668                 1.7725
 IR Inten    --     4.8438                 7.2759                 8.5266
  Atom  AN      X      Y      Z        X      Y      Z        X      Y      Z
     1   6     0.00   0.08   0.04     0.00   0.00   0.00     0.00   0.03   0.02
     2   6     0.12  -0.01   0.01     0.00   0.00   0.00     0.03  -0.01   0.00
     3   6    -0.07  -0.04  -0.03     0.00   0.00   0.00    -0.02  -0.01  -0.01
     4   1    -0.32  -0.17  -0.12     0.01   0.01   0.00    -0.08  -0.05  -0.03
     5   6    -0.12   0.01  -0.01     0.00   0.00   0.00    -0.03  -0.01  -0.01
     6   1    -0.07  -0.44  -0.23     0.00   0.02   0.01    -0.02  -0.13  -0.07
     7   6     0.08  -0.04  -0.01     0.00   0.00   0.00     0.03  -0.01   0.00
     8   1     0.19  -0.22  -0.10    -0.01   0.01   0.00     0.02  -0.05  -0.02
     9   6     0.02   0.11   0.05     0.00   0.00   0.00     0.00   0.04   0.01
    10   1     0.03  -0.12  -0.06     0.00   0.01   0.00     0.01  -0.03  -0.02
    11   1    -0.15  -0.14  -0.08     0.00   0.00   0.00    -0.07  -0.04  -0.03
    12   6    -0.05  -0.05   0.00     0.00   0.00   0.00    -0.03  -0.07   0.01
    13   6     0.00   0.03  -0.01     0.01   0.00   0.00    -0.02   0.03   0.00
    14   6     0.04  -0.02   0.01     0.00   0.00  -0.02     0.08   0.01   0.00
    15   1    -0.07   0.01  -0.01    -0.02  -0.01   0.01     0.03   0.06  -0.02
    16   6     0.02  -0.02   0.01     0.00   0.00   0.00     0.05   0.01   0.00
    17   6     0.05   0.04  -0.01     0.00  -0.01   0.00    -0.07   0.00   0.00
    18   1    -0.16   0.12  -0.04     0.01  -0.01   0.01    -0.05   0.10  -0.02
    19   6    -0.04  -0.02   0.00     0.00   0.01   0.00     0.00  -0.04   0.01
    20   1    -0.03   0.07  -0.02    -0.01  -0.04   0.01     0.05   0.23  -0.05
    21   1    -0.17  -0.04   0.01     0.00  -0.01   0.00     0.15   0.10  -0.02
    22   6    -0.03   0.02  -0.01    -0.02  -0.03  -0.05     0.02  -0.04   0.00
    23   1    -0.09  -0.06   0.21     0.39   0.07   0.57     0.28   0.16  -0.29
    24   1     0.13  -0.01  -0.22    -0.14   0.57   0.21    -0.29   0.02   0.43
    25   1     0.30  -0.22   0.10    -0.07  -0.34  -0.03    -0.51   0.29  -0.16
                    52                     53                     54
                     A                      A                      A
 Frequencies --  1507.8816              1527.5008              1607.9644
 Red. masses --     2.0613                 2.4243                 5.0528
 Frc consts  --     2.7614                 3.3327                 7.6972
 IR Inten    --    34.6397                 0.5821                 8.8820
  Atom  AN      X      Y      Z        X      Y      Z        X      Y      Z
     1   6    -0.06  -0.01  -0.01     0.08  -0.02   0.00     0.03   0.27   0.14
     2   6     0.05   0.06   0.03    -0.11  -0.05  -0.04    -0.06  -0.14  -0.08
     3   6     0.06  -0.06  -0.03    -0.03   0.07   0.03    -0.07   0.14   0.06
     4   1    -0.25  -0.03  -0.04     0.36   0.09   0.09     0.17  -0.08  -0.02
     5   6     0.06  -0.06  -0.02    -0.08   0.09   0.04     0.03  -0.16  -0.08
     6   1    -0.06   0.09   0.04     0.11   0.01   0.02    -0.06  -0.38  -0.20
     7   6     0.04   0.05   0.03    -0.06  -0.06  -0.04     0.11   0.11   0.07
     8   1    -0.27   0.17   0.06     0.31  -0.18  -0.06    -0.19  -0.02  -0.03
     9   6    -0.07  -0.01  -0.01     0.14  -0.03   0.00    -0.04  -0.18  -0.09
    10   1    -0.27   0.17   0.06     0.30  -0.14  -0.05     0.25  -0.08  -0.03
    11   1    -0.24  -0.04  -0.04     0.35   0.06   0.08    -0.26   0.00  -0.05
    12   6    -0.05   0.07  -0.01    -0.11   0.04  -0.01     0.03  -0.10   0.03
    13   6     0.08   0.03  -0.01     0.04   0.03  -0.01     0.03   0.06  -0.01
    14   6    -0.01  -0.09   0.02     0.04  -0.08   0.02     0.02  -0.15   0.04
    15   1    -0.31  -0.13   0.03    -0.25  -0.07   0.03    -0.12   0.00   0.02
    16   6     0.01  -0.09   0.02    -0.01  -0.06   0.01    -0.11   0.11  -0.03
    17   6     0.13   0.06  -0.02     0.12   0.05  -0.01     0.02  -0.09   0.02
    18   1    -0.24   0.09  -0.02    -0.20   0.08  -0.03     0.22  -0.14   0.05
    19   6    -0.06   0.04  -0.01    -0.06   0.03  -0.01     0.01   0.20  -0.05
    20   1    -0.11  -0.15   0.04    -0.09  -0.08   0.02    -0.08  -0.32   0.08
    21   1    -0.41  -0.14   0.03    -0.32  -0.11   0.03     0.03  -0.10   0.02
    22   6     0.02   0.01   0.00     0.00   0.00   0.00     0.01   0.02   0.00
    23   1     0.13   0.10  -0.15     0.12   0.09  -0.11     0.05   0.05  -0.06
    24   1    -0.10  -0.01   0.16    -0.09  -0.02   0.13    -0.02  -0.04   0.03
    25   1    -0.19   0.14  -0.07    -0.15   0.10  -0.05    -0.03   0.04  -0.01
                    55                     56                     57
                     A                      A                      A
 Frequencies --  1621.2146              1638.2661              1639.9083
 Red. masses --     5.8153                 5.6352                 5.8158
 Frc consts  --     9.0054                 8.9111                 9.2150
 IR Inten    --     2.6253                 1.3596                27.8106
  Atom  AN      X      Y      Z        X      Y      Z        X      Y      Z
     1   6     0.03   0.18   0.09     0.13   0.00   0.01     0.06  -0.04  -0.01
     2   6    -0.07  -0.10  -0.06    -0.26  -0.03  -0.04    -0.12   0.01  -0.01
     3   6    -0.03   0.10   0.05     0.25  -0.09  -0.02     0.13  -0.07  -0.02
     4   1     0.15  -0.04   0.00     0.26   0.15   0.11     0.10   0.08   0.05
     5   6     0.02  -0.11  -0.05    -0.23   0.08   0.02    -0.14   0.07   0.02
     6   1    -0.03  -0.23  -0.12     0.14  -0.04  -0.01     0.08   0.02   0.02
     7   6     0.06   0.09   0.05     0.27   0.03   0.05     0.13  -0.01   0.01
     8   1    -0.14   0.00  -0.01     0.18  -0.22  -0.09     0.14  -0.12  -0.05
     9   6     0.00  -0.17  -0.07    -0.21   0.01  -0.01    -0.06   0.05   0.01
    10   1     0.16  -0.03   0.00    -0.23   0.24   0.12    -0.13   0.12   0.03
    11   1    -0.14   0.02   0.01    -0.30  -0.16  -0.12    -0.11  -0.09  -0.06
    12   6    -0.09   0.23  -0.04     0.13   0.04  -0.01    -0.17  -0.09   0.02
    13   6     0.06  -0.09   0.02    -0.14  -0.05   0.01     0.30   0.10  -0.03
    14   6    -0.11   0.21  -0.05     0.10   0.03  -0.01    -0.22  -0.06   0.02
    15   1     0.00  -0.11   0.04     0.22   0.08  -0.03    -0.42  -0.17   0.05
    16   6     0.19  -0.20   0.05    -0.09   0.01   0.00     0.19  -0.02   0.01
    17   6    -0.07   0.12  -0.03     0.11   0.05  -0.01    -0.26  -0.10   0.02
    18   1    -0.34   0.21  -0.05     0.05  -0.10   0.03    -0.09   0.20  -0.05
    19   6     0.01  -0.26   0.06    -0.06  -0.07   0.02     0.13   0.14  -0.03
    20   1     0.12   0.36  -0.08    -0.03   0.11  -0.03     0.07  -0.23   0.05
    21   1    -0.04   0.15  -0.03    -0.13  -0.05   0.01     0.29   0.11  -0.03
    22   6     0.00  -0.02   0.00    -0.01  -0.01   0.00     0.02   0.01   0.00
    23   1    -0.10  -0.09   0.10     0.03   0.02  -0.01    -0.07  -0.04   0.02
    24   1     0.07   0.08  -0.08    -0.04  -0.02   0.04     0.08   0.04  -0.08
    25   1     0.07  -0.06   0.02    -0.04  -0.01  -0.01     0.08   0.01   0.02
                    58                     59                     60
                     A                      A                      A
 Frequencies --  3017.9516              3076.9774              3102.7190
 Red. masses --     1.0386                 1.0967                 1.1020
 Frc consts  --     5.5736                 6.1176                 6.2503
 IR Inten    --    30.8229                19.0599                15.5480
  Atom  AN      X      Y      Z        X      Y      Z        X      Y      Z
     1   6     0.00   0.00   0.00     0.00   0.00   0.00     0.00   0.00   0.00
     2   6     0.00   0.00   0.00     0.00   0.00   0.00     0.00   0.00   0.00
     3   6     0.00   0.00   0.00     0.00   0.00   0.00     0.00   0.00   0.00
     4   1     0.00   0.00   0.00     0.00   0.00   0.00     0.00   0.00   0.00
     5   6     0.00   0.00   0.00     0.00   0.00   0.00     0.00   0.00   0.00
     6   1     0.00   0.00   0.00     0.00   0.00   0.00     0.00   0.00   0.00
     7   6     0.00   0.00   0.00     0.00   0.00   0.00     0.00   0.00   0.00
     8   1     0.00   0.00   0.00     0.00   0.00   0.00     0.00   0.00   0.00
     9   6     0.00   0.00   0.00     0.00   0.00   0.00     0.00   0.00   0.00
    10   1     0.00   0.00   0.00     0.00   0.00   0.00     0.00   0.00   0.00
    11   1     0.00   0.00   0.00     0.00   0.00   0.00     0.00   0.00   0.00
    12   6     0.00   0.00   0.00     0.00   0.00   0.00     0.00   0.00   0.00
    13   6     0.00   0.00   0.00     0.00   0.00   0.00     0.00   0.00   0.00
    14   6     0.00   0.00   0.00     0.00   0.00   0.00     0.00   0.00   0.00
    15   1     0.00  -0.01   0.00     0.00   0.01   0.00     0.01  -0.03   0.01
    16   6     0.00   0.00   0.00     0.00   0.00   0.00     0.00   0.00   0.00
    17   6     0.00   0.00   0.00     0.00   0.00   0.00     0.00   0.00   0.00
    18   1     0.00   0.00   0.00     0.00   0.00   0.00     0.00   0.00   0.00
    19   6     0.00   0.00   0.00     0.00   0.00   0.00     0.00   0.00   0.00
    20   1    -0.01   0.00   0.00     0.01   0.00   0.00     0.02   0.00   0.00
    21   1     0.00   0.00   0.00     0.00   0.00   0.00     0.00   0.00   0.00
    22   6    -0.03  -0.03   0.03     0.01   0.03   0.08     0.07  -0.06   0.01
    23   1    -0.21   0.39   0.08     0.20  -0.38  -0.05    -0.34   0.69   0.13
    24   1     0.39  -0.03   0.28    -0.52   0.04  -0.34    -0.50   0.03  -0.36
    25   1     0.21  -0.03  -0.72     0.19  -0.02  -0.61     0.00  -0.01   0.07
                    61                     62                     63
                     A                      A                      A
 Frequencies --  3153.2680              3155.8651              3157.6941
 Red. masses --     1.0864                 1.0887                 1.0855
 Frc consts  --     6.3646                 6.3883                 6.3770
 IR Inten    --     4.1859                11.3391                 3.3541
  Atom  AN      X      Y      Z        X      Y      Z        X      Y      Z
     1   6     0.00   0.00   0.00    -0.02   0.00   0.00    -0.04   0.01   0.00
     2   6     0.00   0.00   0.00     0.01  -0.02  -0.01     0.01  -0.03  -0.01
     3   6     0.00   0.00   0.00     0.01   0.02   0.01     0.01   0.01   0.01
     4   1     0.00  -0.01   0.00    -0.10   0.23   0.11    -0.16   0.36   0.17
     5   6     0.00   0.00   0.00     0.01   0.01   0.01     0.03   0.03   0.02
     6   1     0.00   0.00   0.00     0.19  -0.03   0.01     0.45  -0.07   0.01
     7   6     0.00   0.00   0.00     0.00  -0.01   0.00     0.01  -0.02  -0.01
     8   1    -0.01  -0.01  -0.01    -0.10  -0.11  -0.07    -0.30  -0.35  -0.22
     9   6     0.00   0.00   0.00     0.00   0.00   0.00     0.00   0.00   0.00
    10   1     0.02   0.02   0.01    -0.17  -0.20  -0.13    -0.11  -0.13  -0.09
    11   1    -0.01   0.03   0.02    -0.04   0.08   0.04    -0.13   0.28   0.14
    12   6     0.00   0.00   0.00     0.00   0.00   0.00     0.00   0.00   0.00
    13   6     0.00   0.01   0.00     0.03  -0.07   0.02    -0.01   0.03  -0.01
    14   6     0.00   0.00   0.00     0.00   0.00   0.00     0.00   0.00   0.00
    15   1     0.04  -0.10   0.03    -0.32   0.78  -0.20     0.15  -0.38   0.10
    16   6     0.01   0.01   0.00     0.00   0.00   0.00     0.00   0.00   0.00
    17   6     0.02  -0.04   0.01     0.00  -0.01   0.00     0.00   0.00   0.00
    18   1    -0.14  -0.17   0.04    -0.02  -0.02   0.01    -0.03  -0.03   0.01
    19   6    -0.07   0.01   0.00     0.00   0.00   0.00     0.01   0.00   0.00
    20   1     0.80  -0.12   0.03     0.05  -0.01   0.00    -0.06   0.01   0.00
    21   1    -0.19   0.48  -0.12    -0.04   0.09  -0.02     0.01  -0.04   0.01
    22   6     0.00   0.00   0.00     0.00   0.00   0.00     0.00   0.00   0.00
    23   1     0.01  -0.01   0.00    -0.01   0.02   0.00     0.00  -0.01   0.00
    24   1     0.02   0.00   0.01     0.00   0.00   0.00     0.00   0.00   0.00
    25   1     0.00   0.00   0.00     0.00   0.00   0.00     0.00   0.00   0.00
                    64                     65                     66
                     A                      A                      A
 Frequencies --  3163.4380              3167.5697              3173.3571
 Red. masses --     1.0873                 1.0900                 1.0910
 Frc consts  --     6.4110                 6.4434                 6.4730
 IR Inten    --     2.2806                19.1480                 6.2784
  Atom  AN      X      Y      Z        X      Y      Z        X      Y      Z
     1   6     0.00   0.00   0.00    -0.01   0.00   0.00    -0.05   0.01   0.00
     2   6     0.02  -0.04  -0.02     0.00   0.01   0.00     0.00   0.00   0.00
     3   6     0.02   0.03   0.02    -0.01  -0.01  -0.01    -0.03  -0.03  -0.02
     4   1    -0.19   0.42   0.20     0.05  -0.11  -0.05    -0.02   0.03   0.02
     5   6    -0.02  -0.03  -0.02     0.01   0.01   0.01     0.01   0.00   0.00
     6   1     0.05  -0.01   0.00     0.10  -0.01   0.00     0.57  -0.09   0.02
     7   6    -0.02   0.04   0.02     0.00   0.00   0.00    -0.02   0.04   0.02
     8   1     0.26   0.30   0.18    -0.12  -0.14  -0.09    -0.05  -0.05  -0.03
     9   6     0.00   0.00   0.00     0.00   0.00   0.00     0.00   0.00   0.00
    10   1    -0.27  -0.31  -0.20     0.09   0.11   0.07     0.32   0.37   0.24
    11   1     0.19  -0.41  -0.20    -0.01   0.02   0.01     0.21  -0.46  -0.22
    12   6     0.00   0.00   0.00     0.00   0.00   0.00     0.00   0.00   0.00
    13   6    -0.01   0.01   0.00     0.00  -0.01   0.00     0.00  -0.01   0.00
    14   6     0.00   0.00   0.00     0.00   0.00   0.00     0.00   0.00   0.00
    15   1     0.06  -0.16   0.04    -0.03   0.07  -0.02    -0.03   0.07  -0.02
    16   6    -0.01  -0.01   0.00    -0.03  -0.04   0.01     0.00   0.00   0.00
    17   6     0.00   0.01   0.00    -0.01   0.04  -0.01     0.00  -0.01   0.00
    18   1     0.12   0.15  -0.04     0.41   0.50  -0.13    -0.02  -0.03   0.01
    19   6    -0.01   0.00   0.00    -0.04   0.01   0.00     0.01   0.00   0.00
    20   1     0.15  -0.02   0.01     0.48  -0.07   0.02    -0.10   0.01   0.00
    21   1     0.03  -0.08   0.02     0.17  -0.43   0.11    -0.06   0.15  -0.04
    22   6     0.00   0.00   0.00     0.00   0.00   0.00     0.00   0.00   0.00
    23   1     0.00  -0.01   0.00     0.00   0.00   0.00     0.00   0.00   0.00
    24   1     0.00   0.00   0.00     0.01   0.00   0.00     0.00   0.00   0.00
    25   1     0.00   0.00   0.00     0.00   0.00   0.00     0.00   0.00   0.00
                    67                     68                     69
                     A                      A                      A
 Frequencies --  3179.1677              3182.7444              3188.6098
 Red. masses --     1.0947                 1.0960                 1.0985
 Frc consts  --     6.5186                 6.5415                 6.5805
 IR Inten    --    23.6190                23.3057                15.8236
  Atom  AN      X      Y      Z        X      Y      Z        X      Y      Z
     1   6     0.00   0.00   0.00     0.01   0.00   0.00    -0.06   0.01   0.00
     2   6     0.02  -0.04  -0.02     0.00  -0.01   0.00    -0.02   0.04   0.02
     3   6    -0.03  -0.03  -0.02     0.00   0.00   0.00     0.02   0.02   0.01
     4   1    -0.19   0.40   0.19    -0.04   0.10   0.05     0.18  -0.39  -0.18
     5   6    -0.03  -0.03  -0.02     0.00   0.00   0.00    -0.02  -0.03  -0.02
     6   1     0.03  -0.01   0.00    -0.11   0.02   0.00     0.61  -0.09   0.02
     7   6     0.02  -0.03  -0.02     0.01  -0.01  -0.01     0.01  -0.02  -0.01
     8   1     0.30   0.34   0.21     0.02   0.02   0.01     0.28   0.32   0.20
     9   6     0.00   0.00   0.00     0.00   0.00   0.00     0.00   0.00   0.00
    10   1     0.30   0.35   0.22     0.04   0.05   0.03    -0.17  -0.19  -0.12
    11   1    -0.18   0.38   0.19    -0.06   0.12   0.06    -0.11   0.23   0.11
    12   6     0.00   0.00   0.00     0.00   0.00   0.00     0.00   0.00   0.00
    13   6     0.00  -0.01   0.00     0.00   0.00   0.00     0.00   0.00   0.00
    14   6     0.00   0.00   0.00     0.00   0.00   0.00     0.00   0.00   0.00
    15   1    -0.02   0.06  -0.02     0.01  -0.03   0.01     0.01  -0.02   0.01
    16   6     0.00   0.00   0.00    -0.04  -0.04   0.01     0.00   0.00   0.00
    17   6    -0.01   0.01   0.00     0.02  -0.05   0.01     0.00   0.00   0.00
    18   1    -0.05  -0.05   0.01     0.42   0.51  -0.14     0.05   0.06  -0.02
    19   6    -0.01   0.00   0.00     0.02   0.00   0.00     0.00   0.00   0.00
    20   1     0.07  -0.01   0.00    -0.24   0.03  -0.01    -0.02   0.00   0.00
    21   1     0.06  -0.14   0.03    -0.24   0.58  -0.14    -0.02   0.05  -0.01
    22   6     0.00   0.00   0.00     0.00   0.00   0.00     0.00   0.00   0.00
    23   1     0.00   0.00   0.00     0.00   0.00   0.00     0.00   0.00   0.00
    24   1     0.00   0.00   0.00     0.00   0.00   0.00     0.00   0.00   0.00
    25   1     0.00   0.00   0.00     0.00   0.00   0.00     0.00   0.00   0.00


 Vibrational Energies and Rotational Constants (cm-1)
 Mode(Quanta)     E(harm)     E(anharm)    Aa(z)       Ba(x)       Ca(y)
 Equilibrium Geometry                     0.067168    0.014939    0.012761
 Ground State   45503.427    44783.320    0.066827    0.014824    0.012684
 Fundamental Bands (DE w.r.t. Ground State)
  1(1)           3188.610     3046.884    0.066813    0.014822    0.012684
  2(1)           3182.744     3055.457    0.066804    0.014821    0.012684
  3(1)           3179.168     3065.722    0.066816    0.014820    0.012684
  4(1)           3173.357     3045.593    0.066814    0.014820    0.012684
  5(1)           3167.570     3047.179    0.066808    0.014821    0.012684
  6(1)           3163.438     3034.708    0.066815    0.014820    0.012684
  7(1)           3157.694     3014.445    0.066816    0.014821    0.012684
  8(1)           3155.865     3010.576    0.066815    0.014819    0.012684
  9(1)           3153.268     3024.135    0.066822    0.014822    0.012683
 10(1)           3102.719     2952.157    0.066817    0.014824    0.012685
 11(1)           3076.977     2926.502    0.066842    0.014822    0.012683
 12(1)           3017.952     2917.611    0.066815    0.014825    0.012685
 13(1)           1639.908     1601.369    0.066784    0.014813    0.012683
 14(1)           1638.266     1595.808    0.066791    0.014814    0.012685
 15(1)           1621.215     1578.183    0.066770    0.014814    0.012662
 16(1)           1607.964     1560.006    0.066782    0.014815    0.012672
 17(1)           1527.501     1486.047    0.066792    0.014816    0.012682
 18(1)           1507.882     1468.954    0.066800    0.014823    0.012682
 19(1)           1494.187     1464.835    0.066815    0.014822    0.012683
 20(1)           1486.107     1456.184    0.066902    0.014824    0.012682
 21(1)           1471.623     1439.986    0.066817    0.014817    0.012680
 22(1)           1435.534     1402.115    0.066809    0.014816    0.012677
 23(1)           1406.579     1377.155    0.066762    0.014821    0.012679
 24(1)           1350.635     1286.680    0.066811    0.014815    0.012683
 25(1)           1336.648     1305.112    0.066817    0.014821    0.012681
 26(1)           1323.206     1296.772    0.066771    0.014812    0.012686
 27(1)           1308.068     1272.980    0.066818    0.014805    0.012653
 28(1)           1293.774     1260.664    0.066808    0.014808    0.012674
 29(1)           1206.300     1193.353    0.066812    0.014813    0.012678
 30(1)           1200.555     1146.133    0.066813    0.014822    0.012686
 31(1)           1189.935     1164.289    0.066814    0.014826    0.012684
 32(1)           1176.759     1157.364    0.066850    0.014823    0.012683
 33(1)           1116.277     1083.477    0.066804    0.014825    0.012684
 34(1)           1098.545     1051.515    0.066845    0.014817    0.012686
 35(1)           1069.869     1047.691    0.066819    0.014819    0.012676
 36(1)           1054.862     1030.015    0.066796    0.014823    0.012683
 37(1)           1042.309     1021.030    0.066815    0.014819    0.012681
 38(1)           1011.279      997.080    0.066828    0.014822    0.012681
 39(1)           1007.257      989.598    0.066840    0.014821    0.012680
 40(1)           1001.801      979.075    0.066809    0.014820    0.012680
 41(1)            994.997      977.077    0.066789    0.014823    0.012684
 42(1)            981.186      964.570    0.066789    0.014822    0.012684
 43(1)            976.544      957.494    0.066794    0.014822    0.012684
 44(1)            932.999      905.563    0.066798    0.014823    0.012684
 45(1)            912.536      894.067    0.066800    0.014824    0.012685
 46(1)            898.203      880.527    0.066835    0.014821    0.012683
 47(1)            868.071      857.080    0.066803    0.014817    0.012679
 48(1)            854.375      827.867    0.066809    0.014822    0.012684
 49(1)            803.607      789.033    0.066801    0.014823    0.012685
 50(1)            766.879      752.623    0.066810    0.014825    0.012685
 51(1)            723.138      713.538    0.066819    0.014822    0.012682
 52(1)            714.496      701.115    0.066826    0.014826    0.012683
 53(1)            711.078      690.011    0.066838    0.014822    0.012685
 54(1)            631.752      625.911    0.066815    0.014823    0.012683
 55(1)            626.601      618.899    0.066840    0.014823    0.012684
 56(1)            585.797      575.261    0.066846    0.014825    0.012686
 57(1)            533.493      528.220    0.066820    0.014825    0.012681
 58(1)            510.602      505.632    0.066824    0.014830    0.012676
 59(1)            452.814      445.940    0.066835    0.014823    0.012686
 60(1)            413.926      400.588    0.066807    0.014826    0.012687
 61(1)            394.719      390.290    0.066847    0.014818    0.012693
 62(1)            328.215      322.929    0.066888    0.014819    0.012688
 63(1)            294.214      269.610    0.066810    0.014825    0.012682
 64(1)            250.283      246.826    0.066769    0.014827    0.012687
 65(1)            212.377      207.778    0.066798    0.014823    0.012688
 66(1)            111.560       92.076    0.067180    0.014832    0.012685
 67(1)             90.136       87.218    0.066515    0.014833    0.012694
 68(1)             57.673       32.515    0.066794    0.014818    0.012690
 69(1)             30.377     -319.289    0.067017    0.014810    0.012667
