# Supplementary material for: Low-energy vibrational spectra of flexible diphenyl molecules: biphenyl, diphenylmethane, bibenzyl and 2-, 3- and 4-phenyltoluene
Source: Royal Society of Chemistry journal article supplement (doi:10.1039/c4cp03278k), 2014-01-01
Supplement: c4cp03278k3.log [file c4cp03278k3.log]

 Harmonic frequencies (cm**-1), IR intensities (KM/Mole), Raman scattering
 activities (A**4/AMU), depolarization ratios for plane and unpolarized
 incident light, reduced masses (AMU), force constants (mDyne/A),
 and normal coordinates:
                     1                      2                      3
                     A                      A                      A
 Frequencies --    25.8106                67.2740                69.5903
 Red. masses --     1.0233                 3.6811                 3.9999
 Frc consts  --     0.0004                 0.0098                 0.0114
 IR Inten    --     0.2643                 0.0131                 0.8268
  Atom  AN      X      Y      Z        X      Y      Z        X      Y      Z
     1   6     0.00   0.00   0.00     0.00   0.00  -0.01     0.00  -0.04   0.18
     2   6     0.00   0.00  -0.01    -0.01  -0.05   0.16     0.01  -0.04   0.16
     3   6     0.00   0.00  -0.01    -0.01  -0.06   0.17     0.01  -0.01   0.04
     4   6     0.00  -0.01   0.01    -0.01   0.06  -0.17    -0.01   0.00   0.03
     5   6     0.00  -0.01   0.01    -0.01   0.06  -0.17    -0.01  -0.03   0.15
     6   6     0.00   0.00   0.00     0.00   0.00   0.00     0.00  -0.01   0.13
     7   6     0.00  -0.01  -0.01     0.00  -0.05  -0.16     0.06  -0.01   0.05
     8   6     0.00   0.00  -0.01     0.00  -0.06  -0.16     0.06   0.00  -0.11
     9   6     0.00   0.00   0.00     0.01   0.00   0.01     0.00   0.01  -0.19
    10   6     0.00   0.01   0.01     0.01   0.06   0.17    -0.05   0.01  -0.10
    11   6     0.00   0.00   0.01     0.01   0.06   0.16    -0.05   0.00   0.07
    12   1     0.00   0.00  -0.02    -0.02  -0.10   0.27     0.02  -0.05   0.20
    13   1     0.00   0.00  -0.02     0.00  -0.11   0.30     0.02   0.00   0.00
    14   1     0.00  -0.01   0.02     0.00   0.11  -0.30    -0.02   0.01  -0.02
    15   1     0.00  -0.01   0.02    -0.01   0.11  -0.28    -0.02  -0.04   0.18
    16   1     0.00  -0.01  -0.02     0.01  -0.10  -0.28     0.10  -0.02   0.10
    17   1     0.00  -0.01  -0.02     0.00  -0.11  -0.29     0.10   0.01  -0.18
    18   1     0.00   0.00   0.00     0.01   0.00   0.01     0.00   0.01  -0.33
    19   1     0.00   0.01   0.03     0.01   0.11   0.31    -0.10   0.02  -0.15
    20   1     0.00   0.01   0.03     0.02   0.10   0.27    -0.10  -0.01   0.12
    21   6     0.00   0.01   0.00    -0.01   0.00   0.01     0.00   0.08  -0.28
    22   1     0.00  -0.42   0.38    -0.01   0.02  -0.01     0.08   0.10  -0.35
    23   1     0.00  -0.09  -0.56    -0.01   0.00   0.04     0.07   0.10  -0.34
    24   1     0.00   0.56   0.20     0.00  -0.03   0.00    -0.17   0.09  -0.34
    25   6     0.00   0.00   0.00    -0.01   0.00   0.00     0.00   0.02  -0.06
                     4                      5                      6
                     A                      A                      A
 Frequencies --   107.0840               192.0816               287.7420
 Red. masses --     3.9886                 3.8734                 5.5334
 Frc consts  --     0.0269                 0.0842                 0.2699
 IR Inten    --     0.2092                 0.0982                 0.0494
  Atom  AN      X      Y      Z        X      Y      Z        X      Y      Z
     1   6     0.00   0.16   0.04     0.00   0.06  -0.05    -0.02  -0.01  -0.06
     2   6     0.08   0.12   0.00     0.01   0.01   0.07    -0.12   0.01  -0.04
     3   6     0.09   0.01  -0.02     0.02  -0.05   0.17    -0.15  -0.02   0.01
     4   6    -0.09   0.01  -0.02    -0.02  -0.05   0.17    -0.14  -0.09   0.02
     5   6    -0.08   0.12   0.00    -0.01   0.01   0.07    -0.12  -0.06  -0.05
     6   6     0.00   0.14   0.09     0.00   0.06  -0.17     0.08   0.03   0.01
     7   6    -0.09   0.07   0.07    -0.07   0.03  -0.15     0.16   0.07   0.05
     8   6    -0.09  -0.09  -0.04    -0.07  -0.02   0.01     0.18   0.04   0.02
     9   6     0.00  -0.18  -0.12     0.00  -0.02   0.13     0.23  -0.02  -0.05
    10   6     0.09  -0.09  -0.04     0.08  -0.02   0.01     0.20  -0.02   0.01
    11   6     0.09   0.07   0.07     0.07   0.03  -0.15     0.18   0.01   0.06
    12   1     0.15   0.16   0.00     0.02   0.02   0.05    -0.17  -0.02  -0.05
    13   1     0.16  -0.03  -0.04     0.04  -0.07   0.20    -0.11  -0.04   0.01
    14   1    -0.16  -0.03  -0.04    -0.04  -0.07   0.20    -0.10  -0.07   0.05
    15   1    -0.15   0.16   0.00    -0.03   0.03   0.05    -0.18  -0.02  -0.06
    16   1    -0.16   0.13   0.11    -0.13   0.05  -0.20     0.19   0.06   0.07
    17   1    -0.17  -0.15  -0.08    -0.14  -0.04   0.07     0.13   0.02   0.04
    18   1     0.00  -0.30  -0.22     0.00  -0.03   0.30     0.23  -0.06  -0.13
    19   1     0.17  -0.15  -0.08     0.14  -0.04   0.07     0.18  -0.01  -0.01
    20   1     0.16   0.13   0.11     0.13   0.05  -0.20     0.24   0.07   0.09
    21   6     0.00  -0.21   0.00    -0.01   0.00  -0.20    -0.24   0.08   0.01
    22   1     0.06  -0.28   0.03     0.16   0.01  -0.30    -0.29   0.14  -0.02
    23   1    -0.11  -0.26  -0.03     0.07   0.02  -0.32    -0.12   0.13   0.00
    24   1     0.05  -0.21   0.02    -0.27   0.03  -0.29    -0.31   0.11  -0.01
    25   6     0.00  -0.05  -0.02     0.00  -0.05   0.12    -0.21  -0.05   0.03
                     7                      8                      9
                     A                      A                      A
 Frequencies --   290.7180               345.9566               407.2017
 Red. masses --     3.6656                 3.2210                 3.4010
 Frc consts  --     0.1825                 0.2271                 0.3323
 IR Inten    --     0.2126                 0.4487                 2.8817
  Atom  AN      X      Y      Z        X      Y      Z        X      Y      Z
     1   6     0.01  -0.03  -0.13     0.00   0.01   0.14     0.00   0.12   0.04
     2   6     0.04  -0.07  -0.09     0.05  -0.02   0.11     0.07   0.16  -0.13
     3   6     0.03  -0.14   0.04     0.04  -0.09  -0.09     0.07  -0.06   0.04
     4   6     0.06  -0.11   0.03    -0.05  -0.08  -0.10    -0.06  -0.03  -0.04
     5   6     0.03  -0.06  -0.08    -0.06  -0.03   0.13    -0.06   0.13  -0.05
     6   6    -0.02   0.08   0.00     0.00   0.07   0.00     0.00  -0.08   0.11
     7   6    -0.08   0.10   0.11    -0.03   0.03  -0.09     0.05  -0.12  -0.03
     8   6    -0.09   0.01   0.03    -0.04  -0.01  -0.03     0.06  -0.02  -0.02
     9   6    -0.07  -0.06  -0.12     0.01   0.00   0.09     0.00   0.05   0.06
    10   6    -0.02   0.03   0.03     0.04  -0.01  -0.03    -0.06  -0.03  -0.06
    11   6    -0.01   0.11   0.11     0.03   0.03  -0.09    -0.05  -0.11   0.01
    12   1     0.06  -0.05  -0.12     0.13   0.00   0.17     0.16   0.28  -0.29
    13   1     0.02  -0.15   0.08     0.12  -0.13  -0.11     0.16  -0.10   0.00
    14   1     0.04  -0.13   0.05    -0.13  -0.12  -0.14    -0.16  -0.04  -0.18
    15   1     0.04  -0.06  -0.10    -0.14  -0.01   0.19    -0.16   0.21  -0.11
    16   1    -0.14   0.15   0.18    -0.06   0.03  -0.14     0.11  -0.19  -0.11
    17   1    -0.12   0.00   0.03    -0.08  -0.04  -0.04     0.13   0.00  -0.07
    18   1    -0.07  -0.15  -0.28     0.01   0.01   0.21     0.00   0.14   0.13
    19   1     0.03   0.01   0.04     0.08  -0.04  -0.04    -0.13  -0.03  -0.15
    20   1     0.01   0.15   0.17     0.07   0.03  -0.14    -0.12  -0.16  -0.03
    21   6     0.06   0.19   0.01     0.00   0.14   0.10    -0.01   0.08   0.00
    22   1    -0.08   0.33  -0.04    -0.35   0.24   0.20    -0.06   0.19  -0.07
    23   1     0.35   0.31   0.01     0.17   0.24   0.25     0.25   0.17  -0.05
    24   1    -0.09   0.28  -0.02     0.20   0.21   0.20    -0.23   0.16  -0.06
    25   6     0.06  -0.12   0.07     0.00  -0.08  -0.18     0.00  -0.14   0.14
                    10                     11                     12
                     A                      A                      A
 Frequencies --   411.6145               418.1439               506.9072
 Red. masses --     2.9694                 2.9971                 3.2311
 Frc consts  --     0.2964                 0.3088                 0.4892
 IR Inten    --     0.5201                 0.0725                14.5297
  Atom  AN      X      Y      Z        X      Y      Z        X      Y      Z
     1   6     0.00   0.02   0.01     0.00   0.01   0.01     0.00  -0.14   0.13
     2   6     0.01  -0.02   0.10     0.01  -0.05   0.16    -0.02  -0.08  -0.06
     3   6     0.01   0.03  -0.12     0.01   0.05  -0.16    -0.03   0.04  -0.04
     4   6    -0.01  -0.05   0.11     0.00  -0.06   0.15     0.04   0.03  -0.05
     5   6    -0.01   0.07  -0.13    -0.01   0.07  -0.17     0.03  -0.09  -0.06
     6   6     0.00  -0.01   0.02     0.00   0.00   0.01     0.00   0.13   0.17
     7   6     0.01   0.04   0.16     0.00  -0.05  -0.13    -0.03   0.08  -0.02
     8   6     0.01  -0.06  -0.16     0.00   0.04   0.11    -0.04  -0.03  -0.09
     9   6     0.00   0.01   0.01     0.00   0.01   0.01     0.00   0.02   0.13
    10   6    -0.01   0.05   0.15    -0.01  -0.05  -0.12     0.04  -0.02  -0.09
    11   6    -0.01  -0.08  -0.16    -0.01   0.03   0.12     0.02   0.08  -0.02
    12   1     0.04  -0.05   0.21     0.02  -0.11   0.32    -0.10  -0.05  -0.28
    13   1     0.03   0.07  -0.26     0.03   0.11  -0.34    -0.11   0.16  -0.25
    14   1    -0.03  -0.10   0.23    -0.01  -0.13   0.32     0.12   0.16  -0.26
    15   1    -0.03   0.13  -0.28    -0.02   0.15  -0.36     0.10  -0.05  -0.27
    16   1     0.02   0.10   0.33     0.01  -0.12  -0.27    -0.08   0.04  -0.20
    17   1     0.02  -0.13  -0.36     0.00   0.09   0.24    -0.09  -0.13  -0.28
    18   1     0.00   0.02   0.03     0.00   0.01   0.02     0.00   0.01   0.21
    19   1    -0.02   0.12   0.32    -0.02  -0.09  -0.26     0.09  -0.12  -0.28
    20   1    -0.01  -0.16  -0.35    -0.01   0.08   0.25     0.07   0.04  -0.20
    21   6     0.00   0.02   0.00     0.01   0.02   0.00    -0.01  -0.02   0.00
    22   1    -0.02   0.04  -0.01     0.00   0.03   0.00     0.14  -0.02  -0.08
    23   1     0.05   0.04  -0.01     0.03   0.03   0.00     0.00  -0.02  -0.09
    24   1    -0.04   0.04  -0.01    -0.01   0.02   0.00    -0.19  -0.02  -0.07
    25   6     0.00  -0.03   0.02     0.01  -0.02   0.01     0.00  -0.01   0.17
                    13                     14                     15
                     A                      A                      A
 Frequencies --   554.6082               564.2425               627.9175
 Red. masses --     2.6958                 5.5798                 6.3993
 Frc consts  --     0.4886                 1.0466                 1.4866
 IR Inten    --     4.4813                 3.2291                 0.0151
  Atom  AN      X      Y      Z        X      Y      Z        X      Y      Z
     1   6     0.02  -0.05   0.19     0.25   0.01  -0.04     0.00  -0.02  -0.03
     2   6     0.01   0.02   0.04     0.13   0.10   0.04     0.07  -0.03  -0.03
     3   6     0.01   0.03  -0.08     0.09   0.11   0.05     0.07   0.04   0.03
     4   6     0.01   0.01  -0.08     0.09  -0.11  -0.03    -0.07   0.04   0.03
     5   6     0.02   0.01   0.03     0.13  -0.10  -0.04    -0.07  -0.03  -0.03
     6   6     0.01  -0.04  -0.18     0.18   0.00   0.02     0.00   0.12  -0.06
     7   6     0.00   0.00  -0.04    -0.01  -0.11   0.04     0.23   0.18  -0.06
     8   6    -0.01   0.02   0.09    -0.05  -0.10   0.02     0.25  -0.22   0.08
     9   6    -0.02  -0.05  -0.12    -0.20   0.01   0.01     0.00  -0.13   0.05
    10   6     0.00   0.03   0.09    -0.05   0.09  -0.05    -0.25  -0.22   0.08
    11   6    -0.01   0.02  -0.05    -0.01   0.10  -0.03    -0.23   0.18  -0.06
    12   1     0.02   0.13  -0.21     0.01   0.01   0.07     0.05  -0.05  -0.01
    13   1     0.04   0.13  -0.39     0.27  -0.01   0.08     0.05   0.03   0.09
    14   1     0.01   0.12  -0.39     0.27  -0.04   0.08    -0.05   0.03   0.09
    15   1    -0.01   0.12  -0.22     0.01  -0.07   0.07    -0.06  -0.05  -0.01
    16   1    -0.03   0.10   0.16    -0.15  -0.04  -0.01     0.10   0.26  -0.09
    17   1    -0.01   0.10   0.34     0.08  -0.04  -0.04     0.11  -0.30   0.10
    18   1    -0.02  -0.05  -0.12    -0.20   0.01   0.01     0.00   0.27  -0.10
    19   1     0.02   0.11   0.34     0.08   0.01  -0.05    -0.11  -0.30   0.10
    20   1     0.01   0.10   0.16    -0.16   0.01  -0.03    -0.10   0.26  -0.09
    21   6    -0.03   0.00   0.01    -0.32   0.00   0.01     0.00   0.01   0.00
    22   1     0.04   0.02  -0.05    -0.33  -0.01   0.02    -0.03   0.02   0.01
    23   1     0.06   0.02  -0.05    -0.33  -0.01   0.02     0.00   0.02   0.02
    24   1    -0.19   0.02  -0.04    -0.28  -0.01   0.02     0.03   0.02   0.01
    25   6    -0.01  -0.06   0.14    -0.16   0.01  -0.04     0.00   0.04  -0.02
                    16                     17                     18
                     A                      A                      A
 Frequencies --   652.6154               711.0661               712.1539
 Red. masses --     6.7385                 1.7801                 5.0728
 Frc consts  --     1.6909                 0.5303                 1.5158
 IR Inten    --     0.3334                36.5798                 2.5705
  Atom  AN      X      Y      Z        X      Y      Z        X      Y      Z
     1   6     0.00  -0.10  -0.05     0.00   0.00   0.00    -0.01   0.01  -0.03
     2   6     0.27  -0.19  -0.05     0.00   0.00   0.00     0.13  -0.01   0.02
     3   6     0.27   0.19   0.06     0.00   0.00   0.00     0.13   0.04  -0.01
     4   6    -0.27   0.19   0.06     0.01  -0.01   0.00     0.12  -0.02  -0.04
     5   6    -0.27  -0.19  -0.06     0.01   0.00   0.00     0.13   0.00   0.02
     6   6     0.00  -0.04   0.00    -0.01   0.04   0.10    -0.19   0.00  -0.01
     7   6    -0.05  -0.08  -0.01     0.00  -0.01  -0.08    -0.07   0.18  -0.05
     8   6    -0.06   0.06   0.01     0.00   0.05   0.13    -0.07   0.18  -0.09
     9   6     0.00   0.02  -0.05     0.01  -0.03  -0.07     0.22   0.00   0.01
    10   6     0.06   0.06   0.01     0.00   0.04   0.14    -0.07  -0.19   0.05
    11   6     0.05  -0.08  -0.01     0.00  -0.03  -0.07    -0.07  -0.17   0.08
    12   1     0.17  -0.25  -0.08    -0.01  -0.01   0.02     0.19   0.00   0.08
    13   1     0.17   0.25   0.05     0.00  -0.01   0.01     0.21  -0.02  -0.01
    14   1    -0.17   0.25   0.05     0.01  -0.01   0.02     0.21   0.02   0.00
    15   1    -0.17  -0.25  -0.08     0.02  -0.01   0.02     0.18  -0.06   0.09
    16   1     0.00  -0.09   0.03     0.00  -0.17  -0.47     0.10   0.11   0.04
    17   1    -0.01   0.12   0.09    -0.02  -0.07  -0.17    -0.31   0.06  -0.01
    18   1     0.00  -0.07   0.01     0.01  -0.20  -0.56     0.21   0.02   0.05
    19   1     0.01   0.12   0.09    -0.01  -0.07  -0.17    -0.32  -0.06   0.01
    20   1     0.00  -0.09   0.03     0.00  -0.18  -0.47     0.09  -0.09   0.05
    21   6     0.00   0.05   0.02    -0.01   0.00   0.00    -0.22   0.00   0.01
    22   1    -0.06   0.09   0.02     0.00   0.00   0.00    -0.20   0.01  -0.01
    23   1     0.07   0.08   0.04    -0.01   0.00   0.00    -0.19   0.00  -0.02
    24   1    -0.01   0.08   0.03    -0.01   0.00   0.00    -0.27   0.00  -0.01
    25   6     0.00   0.10   0.05     0.00   0.00   0.00    -0.03  -0.01   0.02
                    19                     20                     21
                     A                      A                      A
 Frequencies --   728.8790               770.7383               814.3998
 Red. masses --     3.1724                 1.7803                 5.0557
 Frc consts  --     0.9930                 0.6231                 1.9756
 IR Inten    --     2.5338                57.6310                 0.0841
  Atom  AN      X      Y      Z        X      Y      Z        X      Y      Z
     1   6     0.00  -0.08   0.22     0.00  -0.02   0.04     0.12   0.01  -0.04
     2   6     0.01   0.04  -0.13     0.01   0.01   0.01    -0.09   0.24   0.10
     3   6     0.00  -0.05   0.15     0.02   0.00   0.05    -0.02   0.22   0.08
     4   6     0.02  -0.06   0.14    -0.02  -0.01   0.04    -0.02  -0.22  -0.07
     5   6     0.01   0.03  -0.13    -0.01   0.00   0.01    -0.09  -0.25  -0.07
     6   6    -0.02   0.02   0.05     0.00  -0.06  -0.17     0.00   0.01   0.02
     7   6    -0.02   0.01  -0.06     0.00   0.02   0.08    -0.03   0.06  -0.01
     8   6    -0.02   0.03   0.00     0.00   0.01  -0.01    -0.04   0.07  -0.02
     9   6     0.02  -0.02  -0.05     0.00   0.04   0.11     0.06   0.00  -0.01
    10   6     0.01   0.00   0.02     0.00   0.00   0.00    -0.05  -0.08   0.02
    11   6     0.00  -0.02  -0.04     0.00   0.02   0.08    -0.03  -0.07   0.00
    12   1     0.01   0.15  -0.43     0.01   0.11  -0.25    -0.33   0.13   0.03
    13   1     0.00  -0.07   0.20     0.04   0.06  -0.14     0.13   0.18  -0.03
    14   1     0.05  -0.06   0.20    -0.02   0.06  -0.14     0.14  -0.10  -0.17
    15   1     0.02   0.14  -0.43    -0.02   0.11  -0.25    -0.32  -0.11  -0.10
    16   1    -0.02   0.06   0.06    -0.01  -0.03  -0.05    -0.01   0.02  -0.09
    17   1    -0.06   0.09   0.22     0.00  -0.16  -0.46    -0.14   0.02  -0.02
    18   1     0.02   0.03   0.16     0.00  -0.16  -0.44     0.06   0.03   0.05
    19   1    -0.01   0.08   0.22    -0.01  -0.16  -0.46    -0.15   0.01   0.10
    20   1     0.03   0.04   0.07     0.01  -0.03  -0.05    -0.01  -0.04   0.06
    21   6    -0.02   0.01  -0.03     0.00   0.00  -0.01     0.23   0.00  -0.01
    22   1    -0.14  -0.04   0.08    -0.07  -0.01   0.04     0.24  -0.02   0.01
    23   1    -0.16  -0.03   0.08    -0.04   0.00   0.05     0.24   0.01   0.02
    24   1     0.27  -0.03   0.06     0.12   0.00   0.03     0.29   0.00   0.01
    25   6    -0.01   0.07  -0.18     0.00   0.01  -0.05    -0.07   0.00   0.01
                    22                     23                     24
                     A                      A                      A
 Frequencies --   835.7433               847.8123               854.1676
 Red. masses --     1.5640                 1.2482                 1.2492
 Frc consts  --     0.6436                 0.5286                 0.5370
 IR Inten    --    23.6643                 0.3464                 0.1417
  Atom  AN      X      Y      Z        X      Y      Z        X      Y      Z
     1   6     0.01  -0.05   0.13     0.00   0.00   0.00    -0.01   0.00   0.00
     2   6     0.00   0.04  -0.07     0.00  -0.02   0.07     0.00  -0.01   0.00
     3   6     0.00   0.04  -0.05     0.00  -0.03   0.07     0.00   0.00  -0.01
     4   6    -0.01   0.01  -0.06     0.00   0.02  -0.07     0.00   0.00   0.01
     5   6    -0.01   0.01  -0.08     0.00   0.02  -0.07     0.00   0.01   0.01
     6   6     0.00  -0.03  -0.07     0.00   0.00   0.00     0.00   0.00   0.00
     7   6     0.00   0.01   0.00     0.00   0.00   0.01     0.00   0.03   0.07
     8   6    -0.01   0.01   0.00     0.00   0.00   0.00     0.00   0.02   0.07
     9   6     0.00   0.01   0.04     0.01   0.00   0.00     0.00   0.00   0.00
    10   6     0.01   0.00   0.00     0.00   0.00   0.00     0.00  -0.02  -0.07
    11   6     0.00   0.01   0.00     0.00   0.00  -0.01     0.00  -0.03  -0.07
    12   1    -0.02  -0.12   0.33     0.00   0.18  -0.45     0.00  -0.02   0.02
    13   1     0.00  -0.17   0.50     0.00   0.17  -0.46     0.00  -0.02   0.03
    14   1     0.00  -0.19   0.48     0.00  -0.18   0.47     0.00   0.02  -0.04
    15   1    -0.03  -0.13   0.31    -0.01  -0.18   0.46     0.00   0.02  -0.03
    16   1     0.00   0.04   0.06    -0.01  -0.01  -0.03     0.00  -0.18  -0.47
    17   1    -0.03  -0.04  -0.12     0.00  -0.01  -0.03     0.00  -0.16  -0.45
    18   1     0.00  -0.10  -0.18     0.01   0.00   0.00     0.00   0.00   0.00
    19   1     0.02  -0.04  -0.11     0.00   0.01   0.03     0.00   0.17   0.45
    20   1     0.00   0.04   0.08    -0.01   0.01   0.04     0.00   0.18   0.47
    21   6     0.02  -0.01   0.02     0.00   0.00   0.00    -0.01   0.00   0.00
    22   1     0.10   0.04  -0.07     0.02  -0.01   0.00    -0.01   0.00   0.00
    23   1     0.12   0.01  -0.08    -0.01   0.00  -0.01    -0.01   0.00   0.00
    24   1    -0.18   0.02  -0.04     0.00  -0.01   0.00    -0.01   0.00   0.00
    25   6     0.00  -0.01   0.03     0.00   0.00   0.00     0.00   0.00   0.00
                    25                     26                     27
                     A                      A                      A
 Frequencies --   925.6389               961.7194               971.3742
 Red. masses --     1.4137                 1.3099                 1.3546
 Frc consts  --     0.7137                 0.7138                 0.7530
 IR Inten    --     1.7200                 0.7845                 0.6015
  Atom  AN      X      Y      Z        X      Y      Z        X      Y      Z
     1   6     0.00   0.02  -0.03     0.00  -0.02   0.04     0.00   0.00   0.00
     2   6     0.00  -0.01  -0.01     0.00   0.03  -0.08     0.00   0.03  -0.08
     3   6    -0.01  -0.01   0.02     0.00  -0.02   0.06     0.00  -0.03   0.08
     4   6     0.01  -0.01   0.02    -0.01  -0.02   0.06     0.00   0.03  -0.08
     5   6     0.00  -0.01  -0.01     0.00   0.03  -0.08     0.00  -0.03   0.08
     6   6     0.00   0.03   0.07     0.00  -0.01  -0.03     0.00   0.00   0.00
     7   6     0.00  -0.03  -0.09     0.00   0.01   0.01     0.00   0.00  -0.02
     8   6     0.00   0.00   0.00    -0.01   0.00   0.00     0.00   0.01   0.02
     9   6     0.00   0.03   0.09     0.00  -0.01  -0.01    -0.01   0.00   0.00
    10   6     0.00   0.00   0.00     0.01   0.00   0.00     0.00  -0.01  -0.02
    11   6     0.00  -0.04  -0.09     0.00   0.01   0.01     0.00   0.00   0.02
    12   1     0.01  -0.03   0.06    -0.01  -0.19   0.49     0.00  -0.18   0.45
    13   1    -0.02   0.05  -0.13     0.02   0.14  -0.40     0.01   0.16  -0.45
    14   1     0.02   0.05  -0.13    -0.01   0.15  -0.40     0.00  -0.16   0.45
    15   1    -0.01  -0.02   0.06     0.01  -0.19   0.49     0.00   0.17  -0.45
    16   1     0.00   0.20   0.51     0.02  -0.03  -0.07     0.01   0.04   0.09
    17   1     0.00  -0.01  -0.02    -0.02  -0.01  -0.02     0.00  -0.04  -0.11
    18   1     0.00  -0.18  -0.54     0.00   0.01   0.10    -0.01   0.00   0.00
    19   1     0.00  -0.01  -0.02     0.02  -0.01  -0.02     0.00   0.04   0.11
    20   1     0.00   0.20   0.51    -0.02  -0.03  -0.07     0.01  -0.04  -0.09
    21   6     0.00   0.01   0.00     0.00   0.00  -0.02     0.00   0.00   0.00
    22   1     0.01  -0.02   0.01    -0.08  -0.02   0.05     0.01  -0.01   0.00
    23   1    -0.05  -0.01   0.01    -0.04   0.00   0.06    -0.02   0.00   0.00
    24   1     0.04  -0.02   0.00     0.12   0.00   0.03     0.00  -0.01   0.00
    25   6     0.00   0.01   0.00     0.00  -0.01   0.01     0.00   0.00   0.00
                    28                     29                     30
                     A                      A                      A
 Frequencies --   976.4514               994.5511              1001.6295
 Red. masses --     1.3645                 1.2689                 1.4045
 Frc consts  --     0.7665                 0.7395                 0.8302
 IR Inten    --     0.1395                 0.0543                 0.0365
  Atom  AN      X      Y      Z        X      Y      Z        X      Y      Z
     1   6     0.00   0.00   0.00     0.00  -0.01   0.00     0.00   0.03   0.01
     2   6     0.00  -0.01   0.02     0.00   0.01   0.00     0.03  -0.02  -0.01
     3   6     0.00   0.01  -0.02     0.00   0.01   0.00     0.00  -0.06  -0.02
     4   6     0.00  -0.01   0.02     0.00   0.01   0.00     0.00  -0.06  -0.02
     5   6     0.00   0.01  -0.02     0.00   0.01   0.00    -0.03  -0.02  -0.01
     6   6     0.00   0.00   0.00     0.00   0.00   0.00     0.00   0.00  -0.01
     7   6    -0.01  -0.04  -0.07     0.00   0.01   0.03     0.00   0.00   0.01
     8   6     0.00   0.03   0.08     0.00  -0.03  -0.07     0.00  -0.01  -0.01
     9   6     0.02   0.00   0.00     0.00   0.03   0.08     0.00   0.01   0.01
    10   6     0.00  -0.03  -0.08     0.00  -0.03  -0.07     0.00  -0.01  -0.01
    11   6    -0.01   0.04   0.07     0.00   0.01   0.03     0.00   0.00   0.01
    12   1     0.00   0.04  -0.10    -0.03  -0.01   0.01     0.14   0.03   0.03
    13   1    -0.01  -0.03   0.10     0.01   0.01  -0.01     0.01  -0.08  -0.01
    14   1     0.00   0.03  -0.10    -0.01   0.01   0.00    -0.02  -0.06  -0.06
    15   1     0.00  -0.04   0.10     0.03  -0.01   0.01    -0.14   0.03   0.04
    16   1    -0.01   0.16   0.44     0.01  -0.10  -0.25     0.01  -0.03  -0.06
    17   1     0.00  -0.17  -0.46    -0.01   0.17   0.48     0.01   0.02   0.06
    18   1     0.02   0.00   0.00     0.00  -0.19  -0.51     0.00  -0.01  -0.06
    19   1     0.00   0.17   0.46     0.01   0.17   0.48    -0.01   0.02   0.06
    20   1    -0.01  -0.16  -0.44    -0.01  -0.10  -0.25    -0.01  -0.03  -0.06
    21   6     0.00   0.00   0.00     0.00  -0.02  -0.01     0.00   0.14   0.05
    22   1     0.00   0.00   0.00    -0.08   0.02   0.00     0.61  -0.18  -0.01
    23   1     0.01   0.00   0.00     0.08   0.02   0.01    -0.61  -0.14  -0.11
    24   1     0.00   0.00   0.00     0.00   0.03   0.01     0.00  -0.26  -0.09
    25   6     0.00   0.00   0.00     0.00  -0.01   0.00     0.00   0.05   0.02
                    31                     32                     33
                     A                      A                      A
 Frequencies --  1009.0490              1017.0243              1036.5024
 Red. masses --     5.9287                 6.2850                 2.7315
 Frc consts  --     3.5566                 3.8301                 1.7290
 IR Inten    --     0.0518                 7.1530                 0.2127
  Atom  AN      X      Y      Z        X      Y      Z        X      Y      Z
     1   6    -0.06   0.00   0.00    -0.25   0.00   0.00    -0.07   0.00   0.00
     2   6     0.00   0.00  -0.02     0.02  -0.10  -0.04    -0.02   0.16   0.06
     3   6     0.04   0.04   0.03     0.12   0.26   0.11     0.02  -0.11  -0.04
     4   6     0.04  -0.04  -0.02     0.12  -0.27  -0.09     0.02   0.11   0.03
     5   6     0.00   0.00   0.01     0.02   0.11   0.04    -0.02  -0.16  -0.06
     6   6    -0.06   0.00   0.00    -0.24   0.00   0.00    -0.10   0.00   0.00
     7   6    -0.18  -0.32   0.13     0.02   0.06  -0.02    -0.02   0.03  -0.01
     8   6     0.01   0.00  -0.01     0.12  -0.22   0.08     0.05  -0.13   0.05
     9   6     0.36   0.00   0.00    -0.04   0.00   0.00     0.06   0.00   0.00
    10   6     0.01   0.00   0.01     0.12   0.22  -0.08     0.05   0.13  -0.05
    11   6    -0.18   0.32  -0.13     0.02  -0.06   0.02    -0.02  -0.03   0.01
    12   1     0.00  -0.04   0.09    -0.10  -0.16  -0.04     0.25   0.32   0.12
    13   1     0.04   0.07  -0.04     0.01   0.35   0.08     0.28  -0.26  -0.06
    14   1     0.04  -0.06   0.02     0.00  -0.33  -0.15     0.29   0.24   0.11
    15   1     0.00   0.03  -0.08    -0.10   0.16   0.05     0.25  -0.31  -0.12
    16   1    -0.11  -0.41   0.05    -0.04   0.08  -0.02    -0.13   0.08  -0.03
    17   1     0.05   0.03   0.05     0.08  -0.25   0.08    -0.08  -0.22   0.07
    18   1     0.38   0.00   0.00    -0.02   0.00   0.00     0.07   0.00   0.00
    19   1     0.05  -0.03  -0.05     0.08   0.25  -0.08    -0.08   0.22  -0.07
    20   1    -0.11   0.41  -0.05    -0.04  -0.08   0.02    -0.13  -0.08   0.03
    21   6    -0.01   0.00   0.00     0.00  -0.01   0.02    -0.02   0.01  -0.02
    22   1     0.00   0.00  -0.01     0.06   0.02  -0.03    -0.07  -0.02   0.03
    23   1     0.00   0.00  -0.01     0.06   0.01  -0.04    -0.07   0.00   0.04
    24   1    -0.03   0.00   0.00    -0.08   0.00  -0.01     0.05   0.00   0.01
    25   6     0.00   0.00   0.00    -0.03   0.01  -0.02     0.03  -0.01   0.02
                    34                     35                     36
                     A                      A                      A
 Frequencies --  1054.3628              1057.9052              1098.2209
 Red. masses --     1.5436                 1.8982                 1.5915
 Frc consts  --     1.0110                 1.2516                 1.1309
 IR Inten    --    13.4267                 1.0964                 5.0219
  Atom  AN      X      Y      Z        X      Y      Z        X      Y      Z
     1   6    -0.01   0.00   0.00     0.12   0.00   0.00     0.00  -0.01  -0.02
     2   6    -0.01   0.02   0.01     0.01  -0.05  -0.02     0.00   0.01   0.01
     3   6     0.00  -0.03   0.03    -0.04  -0.02   0.00     0.00   0.00   0.00
     4   6     0.00   0.00   0.04    -0.04   0.01   0.01     0.00   0.00   0.00
     5   6    -0.01  -0.02  -0.01     0.01   0.05   0.02     0.00   0.01   0.01
     6   6    -0.01   0.00   0.00     0.10   0.00   0.00     0.00  -0.06   0.02
     7   6     0.00   0.00   0.00    -0.04   0.05  -0.02     0.10   0.04  -0.02
     8   6     0.00   0.01   0.00    -0.03  -0.08   0.03    -0.06   0.06  -0.02
     9   6    -0.01   0.00   0.00     0.13   0.00   0.00     0.00  -0.09   0.03
    10   6     0.00  -0.01   0.00    -0.03   0.08  -0.03     0.06   0.06  -0.02
    11   6     0.00   0.00   0.00    -0.04  -0.05   0.02    -0.10   0.04  -0.02
    12   1     0.03   0.04   0.02    -0.13  -0.14  -0.04     0.02   0.04  -0.04
    13   1     0.03   0.03  -0.17    -0.15   0.05  -0.01     0.03  -0.01   0.00
    14   1     0.03   0.08  -0.15    -0.15  -0.03  -0.03    -0.03  -0.01   0.00
    15   1     0.04  -0.05  -0.01    -0.13   0.14   0.03    -0.02   0.04  -0.04
    16   1     0.03  -0.01   0.01    -0.35   0.22  -0.09     0.45  -0.13   0.07
    17   1     0.03   0.02  -0.01    -0.35  -0.26   0.10    -0.27  -0.05   0.01
    18   1    -0.01   0.01   0.00     0.14   0.00   0.00     0.00  -0.54   0.20
    19   1     0.03  -0.02   0.01    -0.35   0.26  -0.10     0.27  -0.06   0.01
    20   1     0.03   0.02  -0.01    -0.35  -0.21   0.09    -0.45  -0.12   0.07
    21   6     0.01  -0.05   0.14     0.01  -0.01   0.02     0.00   0.00   0.00
    22   1     0.32   0.18  -0.23     0.06   0.02  -0.03     0.02   0.00   0.00
    23   1     0.33   0.01  -0.29     0.06   0.00  -0.04    -0.02   0.00  -0.01
    24   1    -0.70   0.04  -0.11    -0.08   0.01  -0.01    -0.01  -0.01   0.00
    25   6     0.01   0.05  -0.13    -0.01   0.01  -0.02     0.00   0.00   0.00
                    37                     38                     39
                     A                      A                      A
 Frequencies --  1135.1395              1176.6257              1198.4880
 Red. masses --     1.3153                 1.1055                 1.1299
 Frc consts  --     0.9985                 0.9018                 0.9562
 IR Inten    --     5.4639                 0.0446                 0.9568
  Atom  AN      X      Y      Z        X      Y      Z        X      Y      Z
     1   6     0.00   0.04   0.02     0.00   0.00   0.00     0.00   0.00   0.00
     2   6     0.07  -0.03  -0.01     0.00   0.00   0.00     0.02   0.01   0.00
     3   6    -0.07  -0.02  -0.01     0.00   0.00   0.00    -0.02   0.01   0.00
     4   6     0.07  -0.02  -0.01     0.00   0.00   0.00    -0.02  -0.01   0.00
     5   6    -0.07  -0.03  -0.01     0.00   0.00   0.00     0.02  -0.01   0.00
     6   6     0.00   0.01  -0.01     0.00   0.00   0.00     0.00   0.00   0.00
     7   6     0.00   0.00   0.01     0.01  -0.01   0.00     0.04  -0.02   0.01
     8   6     0.00   0.00   0.00    -0.04  -0.02   0.01    -0.04  -0.02   0.01
     9   6     0.00   0.00   0.00     0.00   0.06  -0.02    -0.01   0.00   0.00
    10   6     0.00   0.00   0.00     0.04  -0.02   0.01    -0.04   0.02  -0.01
    11   6     0.00   0.00   0.01    -0.01  -0.01   0.00     0.04   0.02  -0.01
    12   1     0.42   0.15   0.07    -0.01   0.00  -0.01     0.18   0.10   0.03
    13   1    -0.47   0.19   0.06     0.01  -0.01   0.00    -0.19   0.10   0.04
    14   1     0.47   0.19   0.06    -0.01  -0.01   0.00    -0.19  -0.10  -0.04
    15   1    -0.42   0.15   0.07     0.01   0.00  -0.01     0.18  -0.10  -0.03
    16   1     0.04  -0.04  -0.02     0.16  -0.09   0.04     0.39  -0.21   0.08
    17   1    -0.01   0.00   0.00    -0.43  -0.23   0.08    -0.39  -0.21   0.07
    18   1     0.00   0.00   0.00     0.00   0.63  -0.22    -0.01   0.00   0.00
    19   1     0.01   0.00   0.01     0.42  -0.23   0.08    -0.39   0.21  -0.07
    20   1    -0.04  -0.04  -0.02    -0.16  -0.08   0.04     0.39   0.21  -0.08
    21   6     0.00  -0.04  -0.01     0.00   0.00   0.00     0.00   0.00   0.00
    22   1    -0.11   0.03  -0.01     0.00   0.00   0.00     0.00   0.00   0.00
    23   1     0.11   0.02   0.03     0.00   0.00   0.00     0.00   0.00   0.00
    24   1     0.00   0.06   0.02     0.00   0.00   0.00     0.00   0.00   0.00
    25   6     0.00   0.03   0.01     0.00   0.00   0.00     0.00   0.00   0.00
                    40                     41                     42
                     A                      A                      A
 Frequencies --  1205.3289              1229.3521              1292.9589
 Red. masses --     1.1330                 3.0578                 2.9128
 Frc consts  --     0.9698                 2.7228                 2.8690
 IR Inten    --     1.8181                 1.8052                 2.1171
  Atom  AN      X      Y      Z        X      Y      Z        X      Y      Z
     1   6     0.01   0.00   0.00     0.01   0.00   0.00     0.00   0.21   0.09
     2   6    -0.03  -0.03  -0.01     0.10  -0.06  -0.02    -0.06  -0.07  -0.03
     3   6     0.03  -0.02  -0.01    -0.08   0.00   0.00     0.07  -0.06  -0.02
     4   6     0.03   0.03   0.01    -0.08   0.00   0.00    -0.07  -0.06  -0.02
     5   6    -0.03   0.03   0.01     0.10   0.06   0.02     0.06  -0.07  -0.03
     6   6    -0.02   0.00   0.00    -0.03   0.00   0.00     0.00   0.20  -0.08
     7   6     0.02  -0.01   0.00    -0.01   0.00   0.00     0.05  -0.06   0.02
     8   6    -0.01  -0.01   0.00     0.01   0.00   0.00    -0.06  -0.05   0.02
     9   6    -0.01   0.00   0.00     0.00   0.00   0.00     0.00   0.05  -0.02
    10   6    -0.01   0.01   0.00     0.01   0.00   0.00     0.06  -0.05   0.02
    11   6     0.02   0.01   0.00    -0.01   0.00   0.00    -0.05  -0.06   0.02
    12   1    -0.35  -0.20  -0.09     0.45   0.10   0.06    -0.31  -0.21  -0.08
    13   1     0.42  -0.23  -0.08     0.21  -0.17  -0.05    -0.16   0.05   0.02
    14   1     0.42   0.23   0.09     0.21   0.17   0.07     0.15   0.05   0.02
    15   1    -0.35   0.20   0.08     0.45  -0.11  -0.05     0.30  -0.21  -0.08
    16   1     0.20  -0.10   0.05    -0.04   0.01  -0.02     0.34  -0.22   0.08
    17   1    -0.16  -0.09   0.03     0.08   0.03  -0.01     0.23   0.10  -0.04
    18   1    -0.01   0.00   0.00     0.00   0.00   0.00     0.00  -0.09   0.04
    19   1    -0.16   0.09  -0.03     0.08  -0.03   0.01    -0.22   0.10  -0.04
    20   1     0.20   0.10  -0.05    -0.04  -0.01   0.02    -0.34  -0.22   0.08
    21   6     0.02   0.00   0.00     0.14   0.00   0.00     0.00  -0.02  -0.01
    22   1     0.04  -0.01   0.00     0.27  -0.04  -0.02    -0.07   0.03  -0.01
    23   1     0.04   0.01   0.01     0.27   0.05   0.01     0.07   0.01   0.03
    24   1     0.02   0.00   0.00     0.22  -0.01   0.02     0.00   0.07   0.03
    25   6    -0.04   0.00   0.00    -0.35   0.00   0.00     0.00   0.09   0.03
                    43                     44                     45
                     A                      A                      A
 Frequencies --  1299.5016              1322.3868              1333.5944
 Red. masses --     3.3029                 5.9854                 1.4631
 Frc consts  --     3.2863                 6.1669                 1.5331
 IR Inten    --     0.0579                 0.0335                 0.0656
  Atom  AN      X      Y      Z        X      Y      Z        X      Y      Z
     1   6     0.28   0.00   0.00     0.00  -0.19  -0.05     0.00  -0.08  -0.02
     2   6     0.07   0.03   0.01     0.16   0.11   0.04    -0.04  -0.02  -0.01
     3   6    -0.06  -0.06  -0.02    -0.14   0.09   0.03    -0.03   0.01   0.00
     4   6    -0.06   0.06   0.02     0.14   0.09   0.03     0.03   0.01   0.00
     5   6     0.07  -0.02  -0.01    -0.16   0.11   0.04     0.04  -0.02  -0.01
     6   6    -0.28   0.00   0.00     0.00   0.22  -0.07     0.00   0.09  -0.02
     7   6    -0.07   0.03  -0.01     0.13  -0.09   0.03     0.02  -0.02   0.01
     8   6     0.06  -0.06   0.02    -0.14  -0.08   0.03    -0.05  -0.03   0.01
     9   6     0.00   0.00   0.00     0.00   0.15  -0.05     0.00   0.03  -0.01
    10   6     0.06   0.06  -0.02     0.14  -0.08   0.03     0.05  -0.03   0.01
    11   6    -0.07  -0.03   0.01    -0.13  -0.09   0.03    -0.02  -0.02   0.01
    12   1    -0.26  -0.16  -0.05    -0.29  -0.13  -0.04     0.40   0.21   0.08
    13   1    -0.31   0.06   0.02    -0.14   0.10   0.03     0.41  -0.22  -0.08
    14   1    -0.31  -0.06  -0.02     0.14   0.10   0.03    -0.41  -0.22  -0.08
    15   1    -0.27   0.17   0.05     0.29  -0.14  -0.04    -0.40   0.21   0.08
    16   1     0.28  -0.17   0.05     0.00  -0.01   0.02     0.09  -0.06   0.02
    17   1     0.29   0.06  -0.02     0.21   0.10  -0.04     0.14   0.07  -0.02
    18   1     0.00   0.00   0.00     0.00  -0.16   0.06     0.00   0.02  -0.01
    19   1     0.29  -0.06   0.02    -0.21   0.10  -0.04    -0.14   0.07  -0.02
    20   1     0.28   0.17  -0.05    -0.01  -0.01   0.02    -0.09  -0.06   0.02
    21   6     0.01   0.00   0.00     0.00   0.06   0.02     0.00  -0.03  -0.01
    22   1    -0.01   0.01   0.00     0.17  -0.09   0.05    -0.06   0.04  -0.03
    23   1    -0.01  -0.01  -0.01    -0.17  -0.03  -0.09     0.06   0.01   0.05
    24   1    -0.02   0.00  -0.01     0.00  -0.22  -0.08     0.00   0.10   0.03
    25   6    -0.01   0.00   0.00     0.00  -0.28  -0.10     0.00   0.09   0.03
                    46                     47                     48
                     A                      A                      A
 Frequencies --  1349.0213              1406.7053              1426.0371
 Red. masses --     1.6721                 1.2503                 2.5146
 Frc consts  --     1.7929                 1.4578                 3.0129
 IR Inten    --     0.4334                 0.0501                 3.0834
  Atom  AN      X      Y      Z        X      Y      Z        X      Y      Z
     1   6     0.00   0.04   0.01     0.00   0.00   0.00     0.00   0.10   0.04
     2   6    -0.03  -0.02  -0.01     0.00   0.00   0.00     0.15  -0.02  -0.01
     3   6     0.03  -0.02  -0.01     0.00   0.00   0.00    -0.16  -0.01   0.00
     4   6    -0.03  -0.02  -0.01     0.00   0.00   0.00     0.16  -0.01   0.00
     5   6     0.03  -0.02  -0.01     0.00   0.00   0.00    -0.15  -0.02  -0.01
     6   6     0.00  -0.03   0.01     0.00   0.00   0.00     0.00   0.00  -0.02
     7   6     0.12  -0.04   0.02     0.00   0.00   0.00    -0.03  -0.02   0.01
     8   6    -0.04  -0.01   0.00     0.00   0.00   0.00     0.07   0.02  -0.01
     9   6     0.00   0.11  -0.04     0.00   0.00   0.00     0.00   0.00   0.00
    10   6     0.04  -0.01   0.00     0.00   0.00   0.00    -0.07   0.02  -0.01
    11   6    -0.12  -0.04   0.02     0.00   0.00   0.00     0.03  -0.02   0.01
    12   1     0.04   0.02   0.01     0.02   0.01   0.00    -0.25  -0.25  -0.09
    13   1     0.00  -0.01   0.00     0.03  -0.01   0.00     0.31  -0.27  -0.11
    14   1     0.00  -0.01   0.00     0.03   0.01   0.00    -0.31  -0.28  -0.10
    15   1    -0.04   0.02   0.01     0.02   0.00   0.00     0.25  -0.25  -0.08
    16   1    -0.48   0.28  -0.10     0.00   0.00   0.00    -0.01  -0.03   0.00
    17   1    -0.26  -0.12   0.04     0.00   0.00   0.00    -0.16  -0.10   0.04
    18   1     0.00  -0.34   0.12     0.00   0.00   0.00     0.00  -0.17   0.06
    19   1     0.26  -0.12   0.04     0.00   0.00   0.00     0.16  -0.10   0.04
    20   1     0.48   0.28  -0.10     0.00   0.00   0.00     0.01  -0.03   0.00
    21   6     0.00  -0.01   0.00     0.15   0.00  -0.01     0.00  -0.05  -0.02
    22   1    -0.03   0.02  -0.01    -0.48   0.06   0.25     0.00   0.08  -0.12
    23   1     0.03   0.01   0.02    -0.48  -0.21   0.15     0.00  -0.01   0.15
    24   1     0.00   0.05   0.02    -0.56   0.08  -0.23     0.00   0.26   0.09
    25   6     0.00   0.05   0.02    -0.03   0.00   0.00     0.00   0.10   0.04
                    49                     50                     51
                     A                      A                      A
 Frequencies --  1469.1874              1486.1841              1490.6784
 Red. masses --     2.0309                 1.0494                 1.1740
 Frc consts  --     2.5828                 1.3656                 1.5370
 IR Inten    --     6.2005                 6.8182                 6.7042
  Atom  AN      X      Y      Z        X      Y      Z        X      Y      Z
     1   6     0.00   0.03   0.00     0.00   0.00   0.00     0.00   0.05   0.01
     2   6     0.04   0.01   0.01     0.00   0.00   0.00     0.02  -0.02  -0.01
     3   6    -0.01  -0.03  -0.01    -0.01   0.00   0.00    -0.04   0.01   0.00
     4   6     0.01  -0.03  -0.01    -0.01   0.00   0.00     0.04   0.01   0.00
     5   6    -0.04   0.01   0.00     0.00   0.00   0.00    -0.02  -0.02  -0.01
     6   6     0.00  -0.13   0.04     0.00   0.00   0.00     0.00  -0.04   0.01
     7   6     0.08   0.05  -0.02     0.00   0.00   0.00     0.02   0.01   0.00
     8   6    -0.13   0.00   0.00     0.00   0.00   0.00    -0.03   0.01   0.00
     9   6     0.00  -0.10   0.04     0.00   0.00   0.00     0.00  -0.03   0.01
    10   6     0.13   0.00   0.00     0.00   0.00   0.00     0.03   0.01   0.00
    11   6    -0.08   0.05  -0.02     0.00   0.00   0.00    -0.02   0.01   0.00
    12   1    -0.10  -0.07  -0.04     0.01   0.00   0.00     0.00  -0.04  -0.01
    13   1    -0.01  -0.03  -0.02     0.03  -0.01   0.00     0.09  -0.06  -0.02
    14   1     0.01  -0.03  -0.01     0.03   0.01   0.01    -0.09  -0.06  -0.03
    15   1     0.10  -0.07  -0.03     0.01   0.00   0.00     0.00  -0.04  -0.02
    16   1    -0.09   0.16  -0.05     0.00   0.00   0.00    -0.03   0.04  -0.02
    17   1     0.29   0.24  -0.09     0.00   0.00   0.00     0.05   0.05  -0.02
    18   1     0.00   0.52  -0.19     0.00   0.00   0.00     0.00   0.12  -0.04
    19   1    -0.29   0.24  -0.09     0.00   0.00   0.00    -0.05   0.05  -0.02
    20   1     0.09   0.16  -0.05     0.00   0.00   0.00     0.03   0.04  -0.02
    21   6     0.00  -0.03  -0.01     0.02  -0.02   0.05     0.00   0.04   0.01
    22   1     0.10   0.09  -0.16    -0.25   0.54  -0.30    -0.31  -0.17   0.33
    23   1    -0.10  -0.03   0.17    -0.26  -0.22  -0.57     0.31   0.08  -0.37
    24   1     0.00   0.31   0.11     0.30  -0.04   0.12     0.00  -0.63  -0.22
    25   6     0.00   0.05   0.02     0.00  -0.01   0.02     0.00   0.03   0.01
                    52                     53                     54
                     A                      A                      A
 Frequencies --  1513.6534              1543.9681              1594.8200
 Red. masses --     2.1619                 2.7314                 5.1456
 Frc consts  --     2.9184                 3.8363                 7.7110
 IR Inten    --    39.2653                 9.8780                 2.7814
  Atom  AN      X      Y      Z        X      Y      Z        X      Y      Z
     1   6    -0.03   0.00   0.00     0.18   0.00   0.00     0.00   0.23   0.08
     2   6     0.06   0.04   0.02    -0.09  -0.09  -0.03    -0.10  -0.15  -0.06
     3   6     0.03  -0.04  -0.02    -0.09   0.09   0.03    -0.07   0.16   0.06
     4   6     0.03   0.04   0.02    -0.09  -0.09  -0.03     0.07   0.17   0.06
     5   6     0.06  -0.04  -0.01    -0.09   0.09   0.03     0.10  -0.15  -0.06
     6   6    -0.12   0.00   0.00    -0.11   0.00   0.00     0.00   0.07  -0.04
     7   6     0.07  -0.08   0.03     0.01  -0.04   0.01     0.07  -0.07   0.03
     8   6     0.09   0.09  -0.03     0.07   0.04  -0.02     0.01   0.09  -0.03
     9   6    -0.09   0.00   0.00    -0.05   0.00   0.00     0.00  -0.18   0.06
    10   6     0.09  -0.09   0.03     0.07  -0.04   0.02    -0.01   0.09  -0.03
    11   6     0.07   0.08  -0.03     0.02   0.04  -0.01    -0.07  -0.07   0.03
    12   1    -0.19  -0.09  -0.02     0.39   0.15   0.07     0.28   0.03   0.03
    13   1    -0.19   0.06   0.02     0.37  -0.14  -0.05     0.24   0.02   0.00
    14   1    -0.19  -0.06  -0.02     0.37   0.15   0.05    -0.24   0.02   0.00
    15   1    -0.19   0.09   0.02     0.39  -0.15  -0.07    -0.28   0.03   0.03
    16   1    -0.38   0.15  -0.06    -0.17   0.05  -0.03    -0.17   0.05  -0.04
    17   1    -0.39  -0.16   0.06    -0.19  -0.09   0.03    -0.09   0.05  -0.02
    18   1    -0.11   0.00   0.00    -0.06   0.00   0.00     0.00   0.28  -0.10
    19   1    -0.39   0.16  -0.06    -0.19   0.09  -0.03     0.09   0.05  -0.02
    20   1    -0.38  -0.15   0.05    -0.17  -0.05   0.03     0.17   0.05  -0.04
    21   6     0.02   0.00   0.00    -0.03   0.00   0.00     0.00   0.02   0.01
    22   1     0.01   0.01  -0.01    -0.02  -0.02   0.01     0.23   0.03  -0.12
    23   1     0.01   0.00  -0.01    -0.02   0.01   0.02    -0.23  -0.05   0.11
    24   1     0.02   0.00   0.00    -0.04   0.00   0.00     0.00   0.18   0.06
    25   6    -0.07   0.00   0.00     0.15   0.00   0.00     0.00  -0.29  -0.10
                    55                     56                     57
                     A                      A                      A
 Frequencies --  1616.4522              1638.2663              1649.4729
 Red. masses --     5.9265                 5.6233                 5.9152
 Frc consts  --     9.1238                 8.8922                 9.4823
 IR Inten    --     0.9370                10.1924                 0.6662
  Atom  AN      X      Y      Z        X      Y      Z        X      Y      Z
     1   6     0.00   0.18   0.05    -0.07   0.00   0.00     0.19   0.00   0.00
     2   6    -0.03  -0.09  -0.03     0.04   0.01   0.01    -0.28  -0.07  -0.03
     3   6    -0.05   0.09   0.03    -0.03   0.01   0.00     0.29  -0.08  -0.03
     4   6     0.05   0.09   0.03    -0.03  -0.01   0.00     0.29   0.08   0.03
     5   6     0.03  -0.09  -0.03     0.04  -0.01  -0.01    -0.28   0.07   0.02
     6   6     0.00  -0.27   0.08     0.22   0.00   0.00     0.00   0.00   0.00
     7   6    -0.09   0.16  -0.06    -0.29   0.07  -0.03    -0.05   0.01   0.00
     8   6    -0.07  -0.18   0.07     0.27   0.07  -0.02     0.05   0.01   0.00
     9   6     0.00   0.32  -0.11    -0.14   0.00   0.00    -0.03   0.00   0.00
    10   6     0.07  -0.18   0.07     0.27  -0.07   0.03     0.05  -0.01   0.00
    11   6     0.09   0.16  -0.06    -0.29  -0.07   0.03    -0.05  -0.01   0.00
    12   1     0.12  -0.02  -0.02    -0.05  -0.04  -0.03     0.26   0.22   0.09
    13   1     0.14  -0.01  -0.01     0.04  -0.03  -0.01    -0.29   0.23   0.09
    14   1    -0.14  -0.01  -0.01     0.04   0.03   0.01    -0.29  -0.23  -0.08
    15   1    -0.12  -0.02  -0.02    -0.05   0.04   0.02     0.26  -0.22  -0.08
    16   1     0.27  -0.02   0.00     0.29  -0.24   0.10     0.04  -0.04   0.01
    17   1     0.23  -0.04   0.01    -0.25  -0.22   0.08    -0.04  -0.04   0.01
    18   1     0.00  -0.42   0.15    -0.16   0.00   0.00    -0.03   0.00   0.00
    19   1    -0.23  -0.04   0.01    -0.25   0.22  -0.08    -0.04   0.04  -0.01
    20   1    -0.27  -0.02   0.00     0.29   0.24  -0.10     0.04   0.04   0.00
    21   6     0.00   0.01   0.00     0.00   0.00   0.00     0.03   0.00   0.00
    22   1     0.10   0.01  -0.05     0.00  -0.01   0.00     0.01   0.03  -0.02
    23   1    -0.10  -0.02   0.05     0.00   0.00   0.01     0.01  -0.01  -0.04
    24   1     0.00   0.07   0.02     0.00   0.00   0.00     0.06   0.00   0.01
    25   6     0.00  -0.14  -0.05     0.02   0.00   0.00    -0.22   0.00   0.00
                    58                     59                     60
                     A                      A                      A
 Frequencies --  3015.8546              3075.1645              3101.8101
 Red. masses --     1.0395                 1.0955                 1.1021
 Frc consts  --     5.5704                 6.1037                 6.2476
 IR Inten    --    36.5406                20.5154                15.9867
  Atom  AN      X      Y      Z        X      Y      Z        X      Y      Z
     1   6     0.00   0.00   0.00     0.00   0.00   0.00     0.00   0.00   0.00
     2   6     0.00   0.00   0.00     0.00   0.00   0.00     0.00   0.00   0.00
     3   6     0.00   0.00   0.00     0.00   0.00   0.00     0.00   0.00   0.00
     4   6     0.00   0.00   0.00     0.00   0.00   0.00     0.00   0.00   0.00
     5   6     0.00   0.00   0.00     0.00   0.00   0.00     0.00   0.00   0.00
     6   6     0.00   0.00   0.00     0.00   0.00   0.00     0.00   0.00   0.00
     7   6     0.00   0.00   0.00     0.00   0.00   0.00     0.00   0.00   0.00
     8   6     0.00   0.00   0.00     0.00   0.00   0.00     0.00   0.00   0.00
     9   6     0.00   0.00   0.00     0.00   0.00   0.00     0.00   0.00   0.00
    10   6     0.00   0.00   0.00     0.00   0.00   0.00     0.00   0.00   0.00
    11   6     0.00   0.00   0.00     0.00   0.00   0.00     0.00   0.00   0.00
    12   1     0.00   0.00   0.00     0.00   0.00   0.00     0.00   0.00   0.00
    13   1     0.01   0.01   0.00    -0.01  -0.01   0.00     0.01   0.02   0.01
    14   1     0.01  -0.01   0.00    -0.01   0.01   0.00    -0.01   0.02   0.01
    15   1     0.00   0.00   0.00     0.00   0.00   0.00     0.00   0.00   0.00
    16   1     0.00   0.00   0.00     0.00   0.00   0.00     0.00   0.00   0.00
    17   1     0.00   0.00   0.00     0.00   0.00   0.00     0.00   0.00   0.00
    18   1     0.00   0.00   0.00     0.00   0.00   0.00     0.00   0.00   0.00
    19   1     0.00   0.00   0.00     0.00   0.00   0.00     0.00   0.00   0.00
    20   1     0.00   0.00   0.00     0.00   0.00   0.00     0.00   0.00   0.00
    21   6     0.05   0.01  -0.02    -0.02   0.03  -0.08     0.00   0.09   0.03
    22   1    -0.15  -0.27  -0.32     0.20   0.35   0.37    -0.26  -0.42  -0.50
    23   1    -0.16   0.42  -0.08     0.20  -0.51   0.07     0.26  -0.64   0.12
    24   1    -0.25  -0.24   0.69    -0.21  -0.20   0.55     0.00   0.02   0.01
    25   6     0.00   0.00   0.00     0.00   0.00   0.00     0.00   0.00   0.00
                    61                     62                     63
                     A                      A                      A
 Frequencies --  3151.6285              3151.7541              3157.1153
 Red. masses --     1.0875                 1.0874                 1.0845
 Frc consts  --     6.3642                 6.3644                 6.3689
 IR Inten    --    13.0837                22.3160                 2.2219
  Atom  AN      X      Y      Z        X      Y      Z        X      Y      Z
     1   6     0.00   0.00   0.00     0.00   0.00   0.00     0.00   0.00   0.00
     2   6     0.00   0.01   0.00    -0.02   0.03   0.01     0.00   0.00   0.00
     3   6    -0.01  -0.02  -0.01    -0.03  -0.06  -0.02     0.00  -0.01   0.00
     4   6     0.04  -0.06  -0.02    -0.01   0.02   0.01     0.00   0.01   0.00
     5   6     0.02   0.03   0.01     0.00  -0.01   0.00     0.00   0.00   0.00
     6   6     0.00   0.00   0.00     0.00   0.00   0.00     0.00   0.00   0.00
     7   6     0.00   0.00   0.00     0.00  -0.01   0.00     0.01   0.02  -0.01
     8   6     0.00   0.00   0.00     0.00   0.00   0.00     0.02  -0.04   0.01
     9   6     0.00   0.00   0.00     0.00   0.00   0.00    -0.04   0.00   0.00
    10   6     0.00   0.00   0.00     0.00   0.00   0.00     0.02   0.04  -0.01
    11   6     0.00  -0.01   0.00     0.00   0.00   0.00     0.01  -0.02   0.01
    12   1     0.04  -0.07  -0.03     0.21  -0.35  -0.14     0.00   0.00   0.00
    13   1     0.12   0.19   0.07     0.42   0.70   0.26     0.04   0.07   0.03
    14   1    -0.42   0.71   0.26     0.10  -0.17  -0.06     0.04  -0.07  -0.02
    15   1    -0.20  -0.34  -0.13     0.06   0.11   0.04     0.00   0.00   0.00
    16   1     0.01   0.01  -0.01     0.04   0.07  -0.03    -0.16  -0.27   0.10
    17   1     0.00   0.00   0.00     0.03  -0.05   0.02    -0.25   0.42  -0.15
    18   1     0.01   0.00   0.00    -0.03   0.00   0.00     0.49   0.00   0.00
    19   1    -0.02  -0.04   0.01     0.01   0.02  -0.01    -0.25  -0.42   0.15
    20   1    -0.04   0.06  -0.02     0.01  -0.02   0.01    -0.16   0.26  -0.10
    21   6     0.00   0.00   0.00     0.00   0.00   0.00     0.00   0.00   0.00
    22   1     0.01   0.01   0.01     0.01   0.01   0.02     0.00   0.00   0.00
    23   1    -0.01   0.02   0.00     0.00   0.00   0.00     0.00   0.00   0.00
    24   1     0.00   0.00   0.00     0.00   0.00   0.00     0.00   0.00   0.00
    25   6     0.00   0.00   0.00     0.00   0.00   0.00     0.00   0.00   0.00
                    64                     65                     66
                     A                      A                      A
 Frequencies --  3162.8461              3171.9233              3172.8139
 Red. masses --     1.0873                 1.0916                 1.0931
 Frc consts  --     6.4086                 6.4709                 6.4836
 IR Inten    --     3.0981                 7.6290                13.9706
  Atom  AN      X      Y      Z        X      Y      Z        X      Y      Z
     1   6     0.00   0.00   0.00     0.00   0.00   0.00     0.00   0.00   0.00
     2   6     0.00  -0.01   0.00    -0.01   0.02   0.01     0.03  -0.04  -0.02
     3   6     0.00  -0.01   0.00     0.01   0.01   0.00    -0.01  -0.02  -0.01
     4   6     0.00  -0.01   0.00     0.01  -0.01   0.00     0.01  -0.02  -0.01
     5   6     0.00  -0.01   0.00    -0.01  -0.02  -0.01    -0.03  -0.04  -0.02
     6   6     0.00   0.00   0.00     0.00   0.00   0.00     0.00   0.00   0.00
     7   6     0.02   0.04  -0.01    -0.02  -0.04   0.01     0.00   0.00   0.00
     8   6     0.02  -0.03   0.01     0.01  -0.01   0.00    -0.01   0.01  -0.01
     9   6     0.00   0.00   0.00    -0.05   0.00   0.00     0.00   0.00   0.00
    10   6    -0.02  -0.03   0.01     0.01   0.01   0.00     0.01   0.01  -0.01
    11   6    -0.02   0.03  -0.01    -0.02   0.04  -0.01     0.00   0.00   0.00
    12   1    -0.04   0.07   0.03     0.13  -0.21  -0.08    -0.31   0.50   0.20
    13   1     0.05   0.08   0.03    -0.08  -0.13  -0.05     0.14   0.23   0.09
    14   1    -0.05   0.08   0.03    -0.09   0.15   0.05    -0.14   0.22   0.08
    15   1     0.04   0.07   0.03     0.15   0.24   0.09     0.30   0.50   0.19
    16   1    -0.25  -0.41   0.16     0.24   0.40  -0.15    -0.02  -0.04   0.01
    17   1    -0.23   0.39  -0.14    -0.05   0.07  -0.03     0.10  -0.16   0.06
    18   1     0.00   0.00   0.00     0.52   0.00   0.00    -0.02   0.00   0.00
    19   1     0.24   0.39  -0.14    -0.05  -0.07   0.03    -0.10  -0.16   0.06
    20   1     0.25  -0.41   0.16     0.24  -0.40   0.16     0.00  -0.01   0.00
    21   6     0.00   0.00   0.00     0.00   0.00   0.00     0.00   0.00   0.00
    22   1     0.00   0.00   0.00     0.00   0.00   0.00     0.00   0.00   0.00
    23   1     0.00   0.00   0.00     0.00   0.00   0.00     0.00   0.00   0.00
    24   1     0.00   0.00   0.00     0.00   0.00   0.00     0.00   0.00   0.00
    25   6     0.00   0.00   0.00     0.00   0.00   0.00     0.00   0.00   0.00
                    67                     68                     69
                     A                      A                      A
 Frequencies --  3176.2043              3179.1429              3188.4168
 Red. masses --     1.0934                 1.0943                 1.0985
 Frc consts  --     6.4989                 6.5164                 6.5798
 IR Inten    --     2.8337                34.7129                17.4459
  Atom  AN      X      Y      Z        X      Y      Z        X      Y      Z
     1   6     0.00   0.00   0.00     0.00   0.00   0.00     0.00   0.00   0.00
     2   6     0.02  -0.04  -0.02    -0.01   0.01   0.00     0.00   0.00   0.00
     3   6    -0.01  -0.02  -0.01     0.00   0.00   0.00     0.00   0.00   0.00
     4   6    -0.01   0.02   0.01     0.00   0.00   0.00     0.00   0.00   0.00
     5   6     0.02   0.04   0.02     0.01   0.01   0.00     0.00   0.00   0.00
     6   6     0.00   0.00   0.00     0.00   0.00   0.00     0.00   0.00   0.00
     7   6    -0.01  -0.02   0.01     0.02   0.03  -0.01     0.01   0.02  -0.01
     8   6     0.00   0.00   0.00    -0.02   0.03  -0.01    -0.02   0.04  -0.01
     9   6    -0.03   0.00   0.00     0.00   0.00   0.00    -0.06   0.00   0.00
    10   6     0.00   0.00   0.00     0.02   0.03  -0.01    -0.02  -0.04   0.01
    11   6    -0.01   0.02  -0.01    -0.02   0.03  -0.01     0.01  -0.02   0.01
    12   1    -0.28   0.46   0.18     0.07  -0.12  -0.05     0.02  -0.04  -0.01
    13   1     0.14   0.23   0.09    -0.02  -0.04  -0.01    -0.01  -0.01  -0.01
    14   1     0.14  -0.22  -0.08     0.02  -0.04  -0.01    -0.01   0.01   0.01
    15   1    -0.27  -0.45  -0.17    -0.08  -0.13  -0.05     0.02   0.04   0.01
    16   1     0.13   0.21  -0.08    -0.24  -0.39   0.15    -0.14  -0.22   0.09
    17   1     0.01  -0.01   0.00     0.24  -0.39   0.14     0.23  -0.38   0.14
    18   1     0.30   0.00   0.00     0.01   0.00   0.00     0.63   0.00   0.00
    19   1     0.01   0.02  -0.01    -0.24  -0.39   0.14     0.23   0.39  -0.14
    20   1     0.13  -0.21   0.08     0.25  -0.40   0.16    -0.14   0.22  -0.09
    21   6     0.00   0.00   0.00     0.00   0.00   0.00     0.00   0.00   0.00
    22   1     0.00   0.00   0.00     0.00   0.00   0.00     0.00   0.00   0.00
    23   1     0.00   0.00   0.00     0.00   0.00   0.00     0.00   0.00   0.00
    24   1     0.00   0.00   0.00     0.00   0.00   0.00     0.00   0.00   0.00
    25   6     0.00   0.00   0.00     0.00   0.00   0.00     0.00   0.00   0.00
    
    Vibrational Energies and Rotational Constants (cm-1)
 Mode(Quanta)     E(harm)     E(anharm)    Aa(z)       Ba(x)       Ca(y)
 Equilibrium Geometry                     0.093956    0.013148    0.011890
 Ground State   45495.697    44886.931    0.093227    0.013065    0.011823
 Fundamental Bands (DE w.r.t. Ground State)
  1(1)           3188.417     3054.354    0.093202    0.013063    0.011822
  2(1)           3179.143     3070.985    0.093206    0.013062    0.011822
  3(1)           3176.204     3050.885    0.093206    0.013061    0.011822
  4(1)           3172.814     3038.225    0.093207    0.013061    0.011821
  5(1)           3171.923     3042.350    0.093205    0.013062    0.011822
  6(1)           3162.846     3039.129    0.093207    0.013062    0.011822
  7(1)           3157.115     3012.788    0.093206    0.013063    0.011822
  8(1)           3151.754     3016.746    0.093208    0.013062    0.011821
  9(1)           3151.629     3022.951    0.093208    0.013063    0.011821
 10(1)           3101.810     2969.089    0.093216    0.013065    0.011823
 11(1)           3075.164     2942.940    0.093209    0.013065    0.011823
 12(1)           3015.855     2902.860    0.093206    0.013065    0.011823
 13(1)           1649.473     1608.290    0.093156    0.013055    0.011818
 14(1)           1638.266     1593.272    0.093157    0.013057    0.011822
 15(1)           1616.452     1575.708    0.093155    0.013056    0.011807
 16(1)           1594.820     1559.774    0.093158    0.013056    0.011812
 17(1)           1543.968     1501.355    0.093152    0.013058    0.011818
 18(1)           1513.653     1473.189    0.093171    0.013063    0.011821
 19(1)           1490.678     1477.582    0.093216    0.013064    0.011823
 20(1)           1486.184     1469.649    0.093241    0.013067    0.011823
 21(1)           1469.187     1439.954    0.093216    0.013059    0.011818
 22(1)           1426.037     1402.428    0.093227    0.013057    0.011817
 23(1)           1406.705     1382.287    0.093233    0.013059    0.011818
 24(1)           1349.021     1290.221    0.093211    0.013061    0.011821
 25(1)           1333.594     1298.157    0.093214    0.013063    0.011823
 26(1)           1322.387     1286.708    0.093138    0.013054    0.011818
 27(1)           1299.502     1271.291    0.093211    0.013044    0.011796
 28(1)           1292.959     1255.386    0.093147    0.013055    0.011815
 29(1)           1229.352     1197.812    0.093208    0.013055    0.011815
 30(1)           1205.329     1170.690    0.093203    0.013065    0.011824
 31(1)           1198.488     1161.992    0.093209    0.013066    0.011823
 32(1)           1176.626     1160.298    0.093274    0.013064    0.011822
 33(1)           1135.140     1108.841    0.093246    0.013061    0.011823
 34(1)           1098.221     1062.609    0.093266    0.013060    0.011824
 35(1)           1057.905     1024.747    0.093173    0.013064    0.011817
 36(1)           1054.363     1037.607    0.093219    0.013063    0.011822
 37(1)           1036.502     1014.107    0.093208    0.013063    0.011819
 38(1)           1017.024      999.707    0.093256    0.013062    0.011819
 39(1)           1009.049      994.292    0.093230    0.013062    0.011819
 40(1)           1001.629      989.740    0.093217    0.013061    0.011819
 41(1)            994.551      980.672    0.093153    0.013063    0.011823
 42(1)            976.451      956.855    0.093156    0.013063    0.011823
 43(1)            971.374      957.472    0.093178    0.013063    0.011823
 44(1)            961.719      937.155    0.093187    0.013063    0.011823
 45(1)            925.639      903.061    0.093167    0.013064    0.011823
 46(1)            854.168      829.162    0.093220    0.013064    0.011821
 47(1)            847.812      825.766    0.093270    0.013063    0.011821
 48(1)            835.743      818.967    0.093180    0.013064    0.011823
 49(1)            814.400      796.332    0.093168    0.013060    0.011819
 50(1)            770.738      762.677    0.093192    0.013065    0.011822
 51(1)            728.879      720.559    0.093237    0.013065    0.011822
 52(1)            712.154      703.717    0.093226    0.013059    0.011819
 53(1)            711.066      700.127    0.093253    0.013065    0.011822
 54(1)            652.615      645.209    0.093218    0.013064    0.011822
 55(1)            627.917      619.097    0.093210    0.013065    0.011821
 56(1)            564.243      555.705    0.093240    0.013062    0.011819
 57(1)            554.608      548.992    0.093208    0.013065    0.011825
 58(1)            506.907      498.443    0.093261    0.013068    0.011816
 59(1)            418.144      401.053    0.093187    0.013067    0.011826
 60(1)            411.615      407.116    0.093191    0.013067    0.011826
 61(1)            407.202      400.517    0.093391    0.013062    0.011827
 62(1)            345.957      335.764    0.093121    0.013066    0.011821
 63(1)            290.718      285.011    0.093317    0.013063    0.011826
 64(1)            287.742      281.610    0.093236    0.013062    0.011823
 65(1)            192.082      178.952    0.093034    0.013068    0.011827
 66(1)            107.084      104.598    0.093799    0.013073    0.011826
 67(1)             69.590       64.327    0.092577    0.013072    0.011833
 68(1)             67.274       39.201    0.093225    0.013055    0.011825
 69(1)             25.811       -5.437    0.093222    0.013063    0.011821
