# Supplementary material for: Low-energy vibrational spectra of flexible diphenyl molecules: biphenyl, diphenylmethane, bibenzyl and 2-, 3- and 4-phenyltoluene
Source: Royal Society of Chemistry journal article supplement (doi:10.1039/c4cp03278k), 2014-01-01
Supplement: c4cp03278k4.log [file c4cp03278k4.log]

Harmonic frequencies (cm**-1), IR intensities (KM/Mole), Raman scattering
 activities (A**4/AMU), depolarization ratios for plane and unpolarized
 incident light, reduced masses (AMU), force constants (mDyne/A),
 and normal coordinates:
                     1                      2                      3
                    AU                     AU                     BG
 Frequencies --    21.1706                35.4689                54.4282
 Red. masses --     3.6443                 3.9479                 2.7865
 Frc consts  --     0.0010                 0.0029                 0.0049
 IR Inten    --     0.0000                 0.0095                 0.0000
  Atom  AN      X      Y      Z        X      Y      Z        X      Y      Z
     1   6     0.00   0.00  -0.01     0.00   0.00   0.16     0.00   0.00  -0.04
     2   6     0.17   0.01   0.00     0.01  -0.10   0.10    -0.06   0.06   0.00
     3   6     0.17   0.01   0.00     0.01  -0.10  -0.03    -0.06   0.06   0.07
     4   1     0.31   0.01  -0.01     0.02  -0.18   0.14    -0.11   0.11  -0.03
     5   6    -0.17  -0.01   0.00    -0.01   0.10   0.10     0.06  -0.06   0.00
     6   1     0.00   0.00  -0.01     0.00   0.00   0.25     0.00   0.00  -0.09
     7   6    -0.17  -0.01   0.00    -0.01   0.10  -0.03     0.06  -0.06   0.07
     8   1    -0.31  -0.01  -0.01    -0.02   0.18   0.14     0.11  -0.11  -0.03
     9   6     0.00   0.00   0.00     0.00   0.00  -0.09     0.00   0.00   0.11
    10   1     0.31   0.01   0.01     0.02  -0.18  -0.07    -0.11   0.11   0.10
    11   1    -0.31  -0.01   0.01    -0.02   0.18  -0.07     0.11  -0.11   0.10
    12   6     0.00   0.00   0.01     0.00   0.00  -0.20     0.00   0.00   0.17
    13   6     0.00   0.00   0.01     0.00   0.00  -0.20     0.00   0.00  -0.17
    14   1     0.00   0.00   0.01     0.02   0.06  -0.23    -0.22  -0.04   0.32
    15   1     0.00   0.00   0.01    -0.02  -0.06  -0.23     0.22   0.04   0.32
    16   6     0.00   0.00   0.00     0.00   0.00  -0.09     0.00   0.00  -0.11
    17   1     0.00   0.00   0.01     0.02   0.06  -0.23     0.22   0.04  -0.32
    18   1     0.00   0.00   0.01    -0.02  -0.06  -0.23    -0.22  -0.04  -0.32
    19   6    -0.17  -0.01   0.00    -0.01   0.10  -0.03    -0.06   0.06  -0.07
    20   6     0.17   0.01   0.00     0.01  -0.10  -0.03     0.06  -0.06  -0.07
    21   6    -0.17  -0.01   0.00    -0.01   0.10   0.10    -0.06   0.06   0.00
    22   1    -0.31  -0.01   0.01    -0.02   0.18  -0.07    -0.11   0.11  -0.10
    23   6     0.17   0.01   0.00     0.01  -0.10   0.10     0.06  -0.06   0.00
    24   1     0.31   0.01   0.01     0.02  -0.18  -0.07     0.11  -0.11  -0.10
    25   6     0.00   0.00  -0.01     0.00   0.00   0.16     0.00   0.00   0.04
    26   1    -0.31  -0.01  -0.01    -0.02   0.18   0.14    -0.11   0.11   0.03
    27   1     0.00   0.00  -0.01     0.00   0.00   0.25     0.00   0.00   0.09
    28   1     0.31   0.01  -0.01     0.02  -0.18   0.14     0.11  -0.11   0.03
                     4                      5                      6
                    BU                     AG                     AG
 Frequencies --    60.5943               118.8161               234.9189
 Red. masses --     4.3910                 5.1264                 4.8334
 Frc consts  --     0.0095                 0.0426                 0.1572
 IR Inten    --     0.1647                 0.0000                 0.0000
  Atom  AN      X      Y      Z        X      Y      Z        X      Y      Z
     1   6     0.22   0.00   0.00    -0.17   0.14   0.00    -0.15  -0.13   0.00
     2   6     0.12   0.00   0.00    -0.06   0.13   0.00     0.02  -0.11   0.01
     3   6    -0.06   0.00   0.00     0.09   0.13   0.00     0.18  -0.10   0.01
     4   1     0.19   0.00   0.00    -0.13   0.13   0.00    -0.02  -0.10   0.00
     5   6     0.12   0.00   0.00    -0.06   0.13   0.00     0.02  -0.11  -0.01
     6   1     0.37   0.00   0.00    -0.32   0.14   0.00    -0.35  -0.13   0.00
     7   6    -0.06   0.00   0.00     0.09   0.13   0.00     0.18  -0.10  -0.01
     8   1     0.19   0.00   0.00    -0.13   0.13   0.00    -0.02  -0.10   0.00
     9   6    -0.14   0.00   0.00     0.14   0.12   0.00     0.13  -0.07   0.00
    10   1    -0.12   0.00   0.00     0.14   0.14   0.00     0.26  -0.12   0.00
    11   1    -0.12   0.00   0.00     0.14   0.14   0.00     0.26  -0.12   0.00
    12   6    -0.22   0.00   0.00     0.04   0.10   0.00     0.02  -0.02   0.00
    13   6    -0.22   0.00   0.00    -0.04  -0.10   0.00    -0.02   0.02   0.00
    14   1    -0.23   0.01   0.00    -0.01   0.16   0.00     0.01  -0.01   0.00
    15   1    -0.23   0.01   0.00    -0.01   0.16   0.00     0.01  -0.01   0.00
    16   6    -0.14   0.00   0.00    -0.14  -0.12   0.00    -0.13   0.07   0.00
    17   1    -0.23   0.01   0.00     0.01  -0.16   0.00    -0.01   0.01   0.00
    18   1    -0.23   0.01   0.00     0.01  -0.16   0.00    -0.01   0.01   0.00
    19   6    -0.06   0.00   0.00    -0.09  -0.13   0.00    -0.18   0.10   0.01
    20   6    -0.06   0.00   0.00    -0.09  -0.13   0.00    -0.18   0.10  -0.01
    21   6     0.12   0.00   0.00     0.06  -0.13   0.00    -0.02   0.11   0.01
    22   1    -0.12   0.00   0.00    -0.14  -0.14   0.00    -0.26   0.12   0.00
    23   6     0.12   0.00   0.00     0.06  -0.13   0.00    -0.02   0.11  -0.01
    24   1    -0.12   0.00   0.00    -0.14  -0.14   0.00    -0.26   0.12   0.00
    25   6     0.22   0.00   0.00     0.17  -0.14   0.00     0.15   0.13   0.00
    26   1     0.19   0.00   0.00     0.13  -0.13   0.00     0.02   0.10   0.00
    27   1     0.37   0.00   0.00     0.32  -0.14   0.00     0.35   0.13   0.00
    28   1     0.19   0.00   0.00     0.13  -0.13   0.00     0.02   0.10   0.00
                     7                      8                      9
                    BU                     BG                     AU
 Frequencies --   290.4075               313.2452               369.3407
 Red. masses --     3.7257                 2.0727                 2.5563
 Frc consts  --     0.1851                 0.1198                 0.2055
 IR Inten    --     1.8637                 0.0000                 0.2091
  Atom  AN      X      Y      Z        X      Y      Z        X      Y      Z
     1   6     0.15   0.00   0.00     0.00   0.00  -0.04     0.00   0.00   0.04
     2   6    -0.04   0.00   0.00     0.00   0.06  -0.01     0.01  -0.05   0.01
     3   6    -0.15   0.00   0.00     0.00   0.05   0.09    -0.01  -0.04  -0.09
     4   1    -0.03   0.00   0.00     0.00   0.11  -0.04     0.03  -0.11   0.04
     5   6    -0.04   0.00   0.00     0.00  -0.06  -0.01    -0.01   0.05   0.01
     6   1     0.35   0.00   0.00     0.00   0.00  -0.09     0.00   0.00   0.09
     7   6    -0.15   0.00   0.00     0.00  -0.05   0.09     0.01   0.04  -0.09
     8   1    -0.03   0.00   0.00     0.00  -0.11  -0.04    -0.03   0.11   0.04
     9   6    -0.03   0.00   0.00     0.00   0.00   0.10     0.00   0.00  -0.10
    10   1    -0.22   0.00   0.00     0.01   0.11   0.12    -0.03  -0.10  -0.13
    11   1    -0.22   0.00   0.00    -0.01  -0.11   0.12     0.03   0.10  -0.13
    12   6     0.23   0.01   0.00     0.00   0.00  -0.10     0.00   0.00   0.18
    13   6     0.23   0.01   0.00     0.00   0.00   0.10     0.00   0.00   0.18
    14   1     0.27  -0.06   0.01     0.21   0.19  -0.32    -0.09  -0.22   0.33
    15   1     0.27  -0.06  -0.01    -0.21  -0.19  -0.32     0.09   0.22   0.33
    16   6    -0.03   0.00   0.00     0.00   0.00  -0.10     0.00   0.00  -0.10
    17   1     0.27  -0.06   0.01    -0.21  -0.19   0.32    -0.09  -0.22   0.33
    18   1     0.27  -0.06  -0.01     0.21   0.19   0.32     0.09   0.22   0.33
    19   6    -0.15   0.00   0.00     0.00   0.05  -0.09     0.01   0.04  -0.09
    20   6    -0.15   0.00   0.00     0.00  -0.05  -0.09    -0.01  -0.04  -0.09
    21   6    -0.04   0.00   0.00     0.00   0.06   0.01    -0.01   0.05   0.01
    22   1    -0.22   0.00   0.00     0.01   0.11  -0.12     0.03   0.10  -0.13
    23   6    -0.04   0.00   0.00     0.00  -0.06   0.01     0.01  -0.05   0.01
    24   1    -0.22   0.00   0.00    -0.01  -0.11  -0.12    -0.03  -0.10  -0.13
    25   6     0.15   0.00   0.00     0.00   0.00   0.04     0.00   0.00   0.04
    26   1    -0.03   0.00   0.00     0.00   0.11   0.04    -0.03   0.11   0.04
    27   1     0.35   0.00   0.00     0.00   0.00   0.09     0.00   0.00   0.09
    28   1    -0.03   0.00   0.00     0.00  -0.11   0.04     0.03  -0.11   0.04
                    10                     11                     12
                    BG                     AU                     AG
 Frequencies --   411.2802               411.6787               478.2817
 Red. masses --     2.9229                 2.9240                 3.4530
 Frc consts  --     0.2913                 0.2920                 0.4654
 IR Inten    --     0.0000                 0.0000                 0.0000
  Atom  AN      X      Y      Z        X      Y      Z        X      Y      Z
     1   6     0.00   0.00   0.00     0.00   0.00   0.00    -0.14   0.07   0.00
     2   6    -0.15   0.00   0.00     0.15   0.01   0.00     0.09   0.04  -0.02
     3   6     0.15   0.00   0.00    -0.15   0.00   0.01     0.02   0.02  -0.03
     4   1    -0.32   0.00   0.00     0.32   0.01   0.00     0.29   0.00   0.00
     5   6     0.15   0.00   0.00    -0.15  -0.01   0.00     0.09   0.04   0.02
     6   1     0.00   0.00   0.00     0.00   0.00  -0.01    -0.24   0.07   0.00
     7   6    -0.15   0.00   0.00     0.15   0.00   0.01     0.02   0.02   0.03
     8   1     0.32   0.00   0.00    -0.32  -0.01   0.00     0.29   0.00   0.00
     9   6     0.00   0.00   0.00     0.00   0.00   0.01    -0.22  -0.04   0.00
    10   1     0.32   0.00   0.00    -0.32   0.01   0.01     0.22   0.07   0.00
    11   1    -0.32   0.00   0.00     0.32  -0.01   0.01     0.22   0.07   0.00
    12   6     0.00   0.00   0.00     0.00   0.00  -0.02    -0.06  -0.08   0.00
    13   6     0.00   0.00   0.00     0.00   0.00  -0.02     0.06   0.08   0.00
    14   1     0.00   0.01   0.00     0.01   0.02  -0.03     0.00  -0.16   0.00
    15   1     0.00  -0.01   0.00    -0.01  -0.02  -0.03     0.00  -0.16   0.00
    16   6     0.00   0.00   0.00     0.00   0.00   0.01     0.22   0.04   0.00
    17   1     0.00  -0.01   0.00     0.01   0.02  -0.03     0.00   0.16   0.00
    18   1     0.00   0.01   0.00    -0.01  -0.02  -0.03     0.00   0.16   0.00
    19   6     0.15   0.00   0.00     0.15   0.00   0.01    -0.02  -0.02  -0.03
    20   6    -0.15   0.00   0.00    -0.15   0.00   0.01    -0.02  -0.02   0.03
    21   6    -0.15   0.00   0.00    -0.15  -0.01   0.00    -0.09  -0.04  -0.02
    22   1     0.32   0.00   0.00     0.32  -0.01   0.01    -0.22  -0.07   0.00
    23   6     0.15   0.00   0.00     0.15   0.01   0.00    -0.09  -0.04   0.02
    24   1    -0.32   0.00   0.00    -0.32   0.01   0.01    -0.22  -0.07   0.00
    25   6     0.00   0.00   0.00     0.00   0.00   0.00     0.14  -0.07   0.00
    26   1    -0.32   0.00   0.00    -0.32  -0.01   0.00    -0.29   0.00   0.00
    27   1     0.00   0.00   0.00     0.00   0.00  -0.01     0.24  -0.07   0.00
    28   1     0.32   0.00   0.00     0.32   0.01   0.00    -0.29   0.00   0.00
                    13                     14                     15
                    BU                     BU                     AG
 Frequencies --   528.9211               532.1277               620.9916
 Red. masses --     5.8195                 2.9610                 4.5195
 Frc consts  --     0.9592                 0.4940                 1.0269
 IR Inten    --     3.3458                30.5473                 0.0000
  Atom  AN      X      Y      Z        X      Y      Z        X      Y      Z
     1   6    -0.01  -0.23   0.00     0.14  -0.01   0.00     0.09   0.17   0.00
     2   6     0.01  -0.08   0.09    -0.10   0.00   0.00    -0.07   0.01  -0.11
     3   6     0.00  -0.04   0.10     0.02   0.00   0.00     0.06  -0.01  -0.11
     4   1     0.03   0.04   0.02    -0.35   0.00   0.00    -0.27  -0.12  -0.03
     5   6     0.01  -0.08  -0.09    -0.10   0.00   0.00    -0.07   0.01   0.11
     6   1    -0.03  -0.23   0.00     0.17  -0.01   0.00     0.06   0.17   0.00
     7   6     0.00  -0.04  -0.10     0.02   0.00   0.00     0.06  -0.01   0.11
     8   1     0.03   0.04  -0.02    -0.35   0.00   0.00    -0.27  -0.12   0.03
     9   6    -0.02   0.17   0.00     0.21   0.01   0.00     0.07  -0.16   0.00
    10   1     0.01  -0.19   0.01    -0.20  -0.01   0.00    -0.06   0.12  -0.03
    11   1     0.01  -0.19  -0.01    -0.20  -0.01   0.00    -0.06   0.12   0.03
    12   6     0.01   0.29   0.00    -0.09   0.00   0.00    -0.02  -0.17   0.00
    13   6     0.01   0.29   0.00    -0.09   0.00   0.00     0.02   0.17   0.00
    14   1     0.02   0.27   0.00    -0.15   0.10  -0.01     0.04  -0.22  -0.01
    15   1     0.02   0.27   0.00    -0.15   0.10   0.01     0.04  -0.22   0.01
    16   6    -0.02   0.17   0.00     0.21   0.01   0.00    -0.07   0.16   0.00
    17   1     0.02   0.27   0.00    -0.15   0.10  -0.01    -0.04   0.22   0.01
    18   1     0.02   0.27   0.00    -0.15   0.10   0.01    -0.04   0.22  -0.01
    19   6     0.00  -0.04  -0.10     0.02   0.00   0.00    -0.06   0.01  -0.11
    20   6     0.00  -0.04   0.10     0.02   0.00   0.00    -0.06   0.01   0.11
    21   6     0.01  -0.08  -0.09    -0.10   0.00   0.00     0.07  -0.01  -0.11
    22   1     0.01  -0.19  -0.01    -0.20  -0.01   0.00     0.06  -0.12  -0.03
    23   6     0.01  -0.08   0.09    -0.10   0.00   0.00     0.07  -0.01   0.11
    24   1     0.01  -0.19   0.01    -0.20  -0.01   0.00     0.06  -0.12   0.03
    25   6    -0.01  -0.23   0.00     0.14  -0.01   0.00    -0.09  -0.17   0.00
    26   1     0.03   0.04  -0.02    -0.35   0.00   0.00     0.27   0.12  -0.03
    27   1    -0.03  -0.23   0.00     0.17  -0.01   0.00    -0.06  -0.17   0.00
    28   1     0.03   0.04   0.02    -0.35   0.00   0.00     0.27   0.12   0.03
                    16                     17                     18
                    BG                     AU                     AG
 Frequencies --   631.3292               632.5890               712.3486
 Red. masses --     6.3100                 6.3377                 1.7519
 Frc consts  --     1.4818                 1.4943                 0.5238
 IR Inten    --     0.0000                 0.0343                 0.0000
  Atom  AN      X      Y      Z        X      Y      Z        X      Y      Z
     1   6     0.00   0.00   0.10     0.00   0.00  -0.10     0.05  -0.02   0.00
     2   6     0.00   0.18   0.17     0.00  -0.18  -0.17    -0.10   0.00   0.01
     3   6     0.00   0.17  -0.14     0.00  -0.17   0.14     0.05   0.00   0.01
     4   1     0.00   0.08   0.23     0.00  -0.08  -0.23     0.13   0.02   0.01
     5   6     0.00  -0.18   0.17     0.00   0.18  -0.17    -0.10   0.00  -0.01
     6   1     0.00   0.00  -0.21     0.00   0.00   0.21     0.42  -0.02   0.00
     7   6     0.00  -0.17  -0.14     0.00   0.17   0.14     0.05   0.00  -0.01
     8   1     0.00  -0.08   0.23     0.00   0.08  -0.23     0.13   0.02  -0.01
     9   6     0.00   0.00  -0.10     0.00   0.00   0.09    -0.07   0.01   0.00
    10   1     0.00   0.07  -0.20     0.00  -0.07   0.20     0.36  -0.01   0.01
    11   1     0.00  -0.07  -0.20     0.00   0.07   0.20     0.36  -0.01  -0.01
    12   6     0.00   0.00  -0.02     0.00   0.00   0.04     0.00   0.00   0.00
    13   6     0.00   0.00   0.02     0.00   0.00   0.04     0.00   0.00   0.00
    14   1     0.05   0.00  -0.05    -0.02  -0.02   0.06    -0.01  -0.01   0.01
    15   1    -0.05   0.00  -0.05     0.02   0.02   0.06    -0.01  -0.01  -0.01
    16   6     0.00   0.00   0.10     0.00   0.00   0.09     0.07  -0.01   0.00
    17   1    -0.05   0.00   0.05    -0.02  -0.02   0.06     0.01   0.01  -0.01
    18   1     0.05   0.00   0.05     0.02   0.02   0.06     0.01   0.01   0.01
    19   6     0.00   0.17   0.14     0.00   0.17   0.14    -0.05   0.00   0.01
    20   6     0.00  -0.17   0.14     0.00  -0.17   0.14    -0.05   0.00  -0.01
    21   6     0.00   0.18  -0.17     0.00   0.18  -0.17     0.10   0.00   0.01
    22   1     0.00   0.07   0.20     0.00   0.07   0.20    -0.36   0.01   0.01
    23   6     0.00  -0.18  -0.17     0.00  -0.18  -0.17     0.10   0.00  -0.01
    24   1     0.00  -0.07   0.20     0.00  -0.07   0.20    -0.36   0.01  -0.01
    25   6     0.00   0.00  -0.10     0.00   0.00  -0.10    -0.05   0.02   0.00
    26   1     0.00   0.08  -0.23     0.00   0.08  -0.23    -0.13  -0.02   0.01
    27   1     0.00   0.00   0.21     0.00   0.00   0.21    -0.42   0.02   0.00
    28   1     0.00  -0.08  -0.23     0.00  -0.08  -0.23    -0.13  -0.02  -0.01
                    19                     20                     21
                    BU                     AG                     AU
 Frequencies --   712.5600               752.0719               765.7186
 Red. masses --     1.7524                 2.0505                 1.2031
 Frc consts  --     0.5242                 0.6833                 0.4156
 IR Inten    --    80.2629                 0.0000                 0.0176
  Atom  AN      X      Y      Z        X      Y      Z        X      Y      Z
     1   6    -0.05   0.00   0.00    -0.09   0.04   0.00     0.00   0.00   0.01
     2   6     0.10   0.00   0.00     0.01  -0.02  -0.05     0.00  -0.01  -0.01
     3   6    -0.05   0.00   0.00    -0.07  -0.02  -0.04     0.00   0.00  -0.02
     4   1    -0.13   0.00   0.00     0.39  -0.08  -0.01     0.01  -0.03   0.00
     5   6     0.10   0.00   0.00     0.01  -0.02   0.05     0.00   0.01  -0.01
     6   1    -0.42   0.00   0.00     0.33   0.05   0.00     0.00   0.00   0.02
     7   6    -0.05   0.00   0.00    -0.07  -0.02   0.04     0.00   0.00  -0.02
     8   1    -0.13   0.00   0.00     0.39  -0.08   0.01    -0.01   0.03   0.00
     9   6     0.07   0.00   0.00     0.12  -0.03   0.00     0.00   0.00   0.00
    10   1    -0.36   0.00   0.00     0.09   0.01  -0.03     0.02  -0.01  -0.03
    11   1    -0.36   0.00   0.00     0.09   0.01   0.03    -0.02   0.01  -0.03
    12   6     0.00   0.00   0.00     0.06   0.03   0.00     0.00   0.00   0.09
    13   6     0.00   0.00   0.00    -0.06  -0.03   0.00     0.00   0.00   0.09
    14   1    -0.01   0.02   0.00     0.02   0.08   0.00     0.43   0.11  -0.22
    15   1    -0.01   0.02   0.00     0.02   0.08   0.00    -0.43  -0.11  -0.22
    16   6     0.07   0.00   0.00    -0.12   0.03   0.00     0.00   0.00   0.00
    17   1    -0.01   0.02   0.00    -0.02  -0.08   0.00     0.43   0.11  -0.22
    18   1    -0.01   0.02   0.00    -0.02  -0.08   0.00    -0.43  -0.11  -0.22
    19   6    -0.05   0.00   0.00     0.07   0.02  -0.04     0.00   0.00  -0.02
    20   6    -0.05   0.00   0.00     0.07   0.02   0.04     0.00   0.00  -0.02
    21   6     0.10   0.00   0.00    -0.01   0.02  -0.05     0.00   0.01  -0.01
    22   1    -0.36   0.00   0.00    -0.09  -0.01  -0.03    -0.02   0.01  -0.03
    23   6     0.10   0.00   0.00    -0.01   0.02   0.05     0.00  -0.01  -0.01
    24   1    -0.36   0.00   0.00    -0.09  -0.01   0.03     0.02  -0.01  -0.03
    25   6    -0.05   0.00   0.00     0.09  -0.04   0.00     0.00   0.00   0.01
    26   1    -0.13   0.00   0.00    -0.39   0.08  -0.01    -0.01   0.03   0.00
    27   1    -0.42   0.00   0.00    -0.33  -0.05   0.00     0.00   0.00   0.02
    28   1    -0.13   0.00   0.00    -0.39   0.08   0.01     0.01  -0.03   0.00
                    22                     23                     24
                    BU                     BU                     BG
 Frequencies --   769.5675               800.7112               853.3425
 Red. masses --     1.8885                 4.8532                 1.2487
 Frc consts  --     0.6590                 1.8333                 0.5357
 IR Inten    --    58.0483                 0.6159                 0.0000
  Atom  AN      X      Y      Z        X      Y      Z        X      Y      Z
     1   6     0.09   0.00   0.00     0.00   0.12   0.00     0.00   0.00   0.00
     2   6    -0.01   0.00   0.00     0.00  -0.10  -0.16    -0.05   0.00   0.00
     3   6     0.07   0.00   0.00     0.00  -0.06  -0.13    -0.05   0.00   0.00
     4   1    -0.39   0.00   0.00     0.01  -0.29  -0.05     0.34   0.00   0.00
     5   6    -0.01   0.00   0.00     0.00  -0.10   0.16     0.05   0.00   0.00
     6   1    -0.37   0.00   0.00     0.01   0.11   0.00     0.00   0.00   0.00
     7   6     0.07   0.00   0.00     0.00  -0.06   0.13     0.05   0.00   0.00
     8   1    -0.39   0.00   0.00     0.01  -0.29   0.05    -0.34   0.00   0.00
     9   6    -0.15   0.00   0.00     0.00  -0.03   0.00     0.00   0.00   0.00
    10   1    -0.04   0.00   0.00     0.01   0.00  -0.10     0.36   0.00   0.00
    11   1    -0.04   0.00   0.00     0.01   0.00   0.10    -0.36   0.00   0.00
    12   6     0.03   0.01   0.00     0.00   0.22   0.00     0.00   0.00   0.00
    13   6     0.03   0.01   0.00     0.00   0.22   0.00     0.00   0.00   0.00
    14   1     0.07  -0.06   0.01     0.00   0.24   0.00     0.01   0.01  -0.01
    15   1     0.07  -0.06  -0.01     0.00   0.24   0.00    -0.01  -0.01  -0.01
    16   6    -0.15   0.00   0.00     0.00  -0.03   0.00     0.00   0.00   0.00
    17   1     0.07  -0.06   0.01     0.00   0.24   0.00    -0.01  -0.01   0.01
    18   1     0.07  -0.06  -0.01     0.00   0.24   0.00     0.01   0.01   0.01
    19   6     0.07   0.00   0.00     0.00  -0.06   0.13    -0.05   0.00   0.00
    20   6     0.07   0.00   0.00     0.00  -0.06  -0.13     0.05   0.00   0.00
    21   6    -0.01   0.00   0.00     0.00  -0.10   0.16    -0.05   0.00   0.00
    22   1    -0.04   0.00   0.00     0.01   0.00   0.10     0.36   0.00   0.00
    23   6    -0.01   0.00   0.00     0.00  -0.10  -0.16     0.05   0.00   0.00
    24   1    -0.04   0.00   0.00     0.01   0.00  -0.10    -0.36   0.00   0.00
    25   6     0.09   0.00   0.00     0.00   0.12   0.00     0.00   0.00   0.00
    26   1    -0.39   0.00   0.00     0.01  -0.29   0.05     0.34   0.00   0.00
    27   1    -0.37   0.00   0.00     0.01   0.11   0.00     0.00   0.00   0.00
    28   1    -0.39   0.00   0.00     0.01  -0.29  -0.05    -0.34   0.00   0.00
                    25                     26                     27
                    AU                     AG                     AG
 Frequencies --   853.3701               857.2577               918.7328
 Red. masses --     1.2483                 2.8630                 1.6080
 Frc consts  --     0.5356                 1.2396                 0.7997
 IR Inten    --     0.0000                 0.0000                 0.0000
  Atom  AN      X      Y      Z        X      Y      Z        X      Y      Z
     1   6     0.00   0.00   0.00    -0.06  -0.05   0.00     0.07  -0.01   0.00
     2   6     0.05   0.00   0.00     0.00   0.06   0.09     0.01   0.02   0.02
     3   6     0.05   0.00   0.00     0.00   0.03   0.07    -0.07   0.00   0.01
     4   1    -0.34   0.00   0.00     0.15   0.16   0.03    -0.03   0.04   0.01
     5   6    -0.05   0.00   0.00     0.00   0.06  -0.09     0.01   0.02  -0.02
     6   1     0.00   0.00   0.00     0.31  -0.04   0.00    -0.39  -0.01   0.00
     7   6    -0.05   0.00   0.00     0.00   0.03  -0.07    -0.07   0.00  -0.01
     8   1     0.34   0.00   0.00     0.15   0.16  -0.03    -0.03   0.04  -0.01
     9   6     0.00   0.00   0.00     0.10  -0.03   0.00     0.06  -0.02   0.00
    10   1    -0.36   0.00   0.00    -0.19   0.02   0.07     0.38   0.01   0.02
    11   1     0.36   0.00   0.00    -0.19   0.02  -0.07     0.38   0.01  -0.02
    12   6     0.00   0.00   0.00    -0.03  -0.18   0.00     0.06  -0.06   0.00
    13   6     0.00   0.00   0.00     0.03   0.18   0.00    -0.06   0.06   0.00
    14   1     0.02   0.01  -0.01     0.04  -0.26  -0.01     0.06  -0.07   0.00
    15   1    -0.02  -0.01  -0.01     0.04  -0.26   0.01     0.06  -0.07   0.00
    16   6     0.00   0.00   0.00    -0.10   0.03   0.00    -0.06   0.02   0.00
    17   1     0.02   0.01  -0.01    -0.04   0.26   0.01    -0.06   0.07   0.00
    18   1    -0.02  -0.01  -0.01    -0.04   0.26  -0.01    -0.06   0.07   0.00
    19   6    -0.05   0.00   0.00     0.00  -0.03   0.07     0.07   0.00   0.01
    20   6     0.05   0.00   0.00     0.00  -0.03  -0.07     0.07   0.00  -0.01
    21   6    -0.05   0.00   0.00     0.00  -0.06   0.09    -0.01  -0.02   0.02
    22   1     0.36   0.00   0.00     0.19  -0.02   0.07    -0.38  -0.01   0.02
    23   6     0.05   0.00   0.00     0.00  -0.06  -0.09    -0.01  -0.02  -0.02
    24   1    -0.36   0.00   0.00     0.19  -0.02  -0.07    -0.38  -0.01  -0.02
    25   6     0.00   0.00   0.00     0.06   0.05   0.00    -0.07   0.01   0.00
    26   1     0.34   0.00   0.00    -0.15  -0.16   0.03     0.03  -0.04   0.01
    27   1     0.00   0.00   0.00    -0.31   0.04   0.00     0.39   0.01   0.00
    28   1    -0.34   0.00   0.00    -0.15  -0.16  -0.03     0.03  -0.04  -0.01
                    28                     29                     30
                    BU                     BG                     AU
 Frequencies --   919.9272               972.4622               972.6078
 Red. masses --     1.4016                 1.3668                 1.3631
 Frc consts  --     0.6988                 0.7615                 0.7597
 IR Inten    --     2.8512                 0.0000                 0.0252
  Atom  AN      X      Y      Z        X      Y      Z        X      Y      Z
     1   6    -0.07   0.00   0.00     0.00   0.00   0.00     0.00   0.00   0.00
     2   6    -0.01   0.00   0.00     0.07   0.00   0.00    -0.07   0.00   0.00
     3   6     0.07   0.00   0.00    -0.06   0.00   0.00     0.06   0.00   0.00
     4   1     0.03   0.00   0.00    -0.36  -0.01   0.00     0.36   0.00   0.00
     5   6    -0.01   0.00   0.00    -0.07   0.00   0.00     0.07   0.00   0.00
     6   1     0.41   0.00   0.00     0.00   0.00   0.01     0.00   0.00   0.00
     7   6     0.07   0.00   0.00     0.06   0.00   0.00    -0.06   0.00   0.00
     8   1     0.03   0.00   0.00     0.36   0.01   0.00    -0.36   0.00   0.00
     9   6    -0.05   0.00   0.00     0.00   0.00   0.00     0.00   0.00   0.00
    10   1    -0.39   0.00   0.00     0.33   0.00   0.00    -0.33   0.00   0.00
    11   1    -0.39   0.00   0.00    -0.33   0.00   0.00     0.33   0.00   0.00
    12   6     0.01   0.01   0.00     0.00   0.00   0.01     0.00   0.00   0.00
    13   6     0.01   0.01   0.00     0.00   0.00  -0.01     0.00   0.00   0.00
    14   1     0.03  -0.03   0.00     0.01   0.03  -0.01     0.00   0.01   0.00
    15   1     0.03  -0.03   0.00    -0.01  -0.03  -0.01     0.00  -0.01   0.00
    16   6    -0.05   0.00   0.00     0.00   0.00   0.00     0.00   0.00   0.00
    17   1     0.03  -0.03   0.00    -0.01  -0.03   0.01     0.00   0.01   0.00
    18   1     0.03  -0.03   0.00     0.01   0.03   0.01     0.00  -0.01   0.00
    19   6     0.07   0.00   0.00    -0.06   0.00   0.00    -0.06   0.00   0.00
    20   6     0.07   0.00   0.00     0.06   0.00   0.00     0.06   0.00   0.00
    21   6    -0.01   0.00   0.00     0.07   0.00   0.00     0.07   0.00   0.00
    22   1    -0.39   0.00   0.00     0.33   0.00   0.00     0.33   0.00   0.00
    23   6    -0.01   0.00   0.00    -0.07   0.00   0.00    -0.07   0.00   0.00
    24   1    -0.39   0.00   0.00    -0.33   0.00   0.00    -0.33   0.00   0.00
    25   6    -0.07   0.00   0.00     0.00   0.00   0.00     0.00   0.00   0.00
    26   1     0.03   0.00   0.00    -0.36  -0.01   0.00    -0.36   0.00   0.00
    27   1     0.41   0.00   0.00     0.00   0.00  -0.01     0.00   0.00   0.00
    28   1     0.03   0.00   0.00     0.36   0.01   0.00     0.36   0.00   0.00
                    31                     32                     33
                    BG                     AG                     BU
 Frequencies --   991.5231               993.4222               994.3099
 Red. masses --     1.7163                 1.3074                 1.2669
 Frc consts  --     0.9941                 0.7602                 0.7380
 IR Inten    --     0.0000                 0.0000                 0.0844
  Atom  AN      X      Y      Z        X      Y      Z        X      Y      Z
     1   6     0.00   0.00  -0.03     0.07   0.00   0.00    -0.07   0.00   0.00
     2   6     0.00   0.03   0.02    -0.06   0.00   0.00     0.06   0.00   0.00
     3   6    -0.01  -0.01   0.05     0.02   0.00   0.00    -0.02   0.00   0.00
     4   1    -0.02   0.10  -0.02     0.36   0.00   0.00    -0.36   0.00   0.00
     5   6     0.00  -0.03   0.02    -0.06   0.00   0.00     0.06   0.00   0.00
     6   1     0.00   0.00  -0.14    -0.42   0.00   0.00     0.40   0.00   0.00
     7   6     0.01   0.01   0.05     0.02   0.00   0.00    -0.02   0.00   0.00
     8   1     0.02  -0.10  -0.02     0.36   0.00   0.00    -0.36   0.00   0.00
     9   6     0.00   0.00  -0.04     0.01   0.00   0.00     0.00   0.00   0.00
    10   1     0.05  -0.03   0.05    -0.15   0.00   0.00     0.18   0.00   0.00
    11   1    -0.05   0.03   0.05    -0.15   0.00   0.00     0.18   0.00   0.00
    12   6     0.00   0.00  -0.15    -0.04   0.00   0.00     0.00   0.00   0.00
    13   6     0.00   0.00   0.15     0.04   0.00   0.00     0.00   0.00   0.00
    14   1    -0.16  -0.40   0.14    -0.04   0.01  -0.01    -0.01   0.00   0.00
    15   1     0.16   0.40   0.14    -0.04   0.01   0.01    -0.01   0.00   0.00
    16   6     0.00   0.00   0.04    -0.01   0.00   0.00     0.00   0.00   0.00
    17   1     0.16   0.40  -0.14     0.04  -0.01   0.01    -0.01   0.00   0.00
    18   1    -0.16  -0.40  -0.14     0.04  -0.01  -0.01    -0.01   0.00   0.00
    19   6    -0.01  -0.01  -0.05    -0.02   0.00   0.00    -0.02   0.00   0.00
    20   6     0.01   0.01  -0.05    -0.02   0.00   0.00    -0.02   0.00   0.00
    21   6     0.00   0.03  -0.02     0.06   0.00   0.00     0.06   0.00   0.00
    22   1     0.05  -0.03  -0.05     0.15   0.00   0.00     0.18   0.00   0.00
    23   6     0.00  -0.03  -0.02     0.06   0.00   0.00     0.06   0.00   0.00
    24   1    -0.05   0.03  -0.05     0.15   0.00   0.00     0.18   0.00   0.00
    25   6     0.00   0.00   0.03    -0.07   0.00   0.00    -0.07   0.00   0.00
    26   1    -0.02   0.10   0.02    -0.36   0.00   0.00    -0.36   0.00   0.00
    27   1     0.00   0.00   0.14     0.42   0.00   0.00     0.40   0.00   0.00
    28   1     0.02  -0.10   0.02    -0.36   0.00   0.00    -0.36   0.00   0.00
                    34                     35                     36
                    BU                     AG                     AG
 Frequencies --  1011.5271              1011.7508              1012.5383
 Red. masses --     6.3140                 5.1647                 4.6516
 Frc consts  --     3.8064                 3.1149                 2.8098
 IR Inten    --     0.4575                 0.0000                 0.0000
  Atom  AN      X      Y      Z        X      Y      Z        X      Y      Z
     1   6     0.00   0.28   0.00     0.00   0.20   0.00     0.01  -0.14   0.00
     2   6     0.00  -0.02  -0.04    -0.01  -0.01  -0.02    -0.01   0.02   0.04
     3   6     0.00  -0.14   0.25     0.04  -0.10   0.17     0.04   0.07  -0.14
     4   1     0.00   0.00  -0.03     0.07   0.00  -0.01     0.08   0.01   0.04
     5   6     0.00  -0.02   0.04    -0.01  -0.01   0.02    -0.01   0.02  -0.04
     6   1     0.00   0.28   0.00    -0.04   0.21   0.00    -0.04  -0.15   0.00
     7   6     0.00  -0.14  -0.25     0.04  -0.10  -0.17     0.04   0.07   0.14
     8   1     0.00   0.00   0.03     0.07   0.00   0.01     0.08   0.01  -0.04
     9   6     0.00   0.02   0.00    -0.07   0.00   0.00    -0.08  -0.02   0.00
    10   1     0.01  -0.11   0.27    -0.17  -0.09   0.19    -0.20   0.05  -0.15
    11   1     0.01  -0.11  -0.27    -0.17  -0.09  -0.19    -0.20   0.05   0.15
    12   6     0.00   0.02   0.00     0.25   0.00   0.00     0.29  -0.03   0.00
    13   6     0.00   0.02   0.00    -0.25   0.00   0.00    -0.29   0.03   0.00
    14   1     0.01  -0.01   0.00     0.23  -0.05   0.02     0.27  -0.06   0.02
    15   1     0.01  -0.01   0.00     0.23  -0.05  -0.02     0.27  -0.06  -0.02
    16   6     0.00   0.02   0.00     0.07   0.00   0.00     0.08   0.02   0.00
    17   1     0.01  -0.01   0.00    -0.23   0.05  -0.02    -0.27   0.06  -0.02
    18   1     0.01  -0.01   0.00    -0.23   0.05   0.02    -0.27   0.06   0.02
    19   6     0.00  -0.14  -0.25    -0.04   0.10   0.17    -0.04  -0.07  -0.14
    20   6     0.00  -0.14   0.25    -0.04   0.10  -0.17    -0.04  -0.07   0.14
    21   6     0.00  -0.02   0.04     0.01   0.01  -0.02     0.01  -0.02   0.04
    22   1     0.01  -0.11  -0.27     0.17   0.09   0.19     0.20  -0.05  -0.15
    23   6     0.00  -0.02  -0.04     0.01   0.01   0.02     0.01  -0.02  -0.04
    24   1     0.01  -0.11   0.27     0.17   0.09  -0.19     0.20  -0.05   0.15
    25   6     0.00   0.28   0.00     0.00  -0.20   0.00    -0.01   0.14   0.00
    26   1     0.00   0.00   0.03    -0.07   0.00  -0.01    -0.08  -0.01   0.04
    27   1     0.00   0.28   0.00     0.04  -0.21   0.00     0.04   0.15   0.00
    28   1     0.00   0.00  -0.03    -0.07   0.00   0.01    -0.08  -0.01  -0.04
                    37                     38                     39
                    BU                     AG                     AU
 Frequencies --  1045.8064              1046.3120              1083.5922
 Red. masses --     2.2066                 2.1786                 1.5756
 Frc consts  --     1.4219                 1.4052                 1.0900
 IR Inten    --     8.6760                 0.0000                 8.7989
  Atom  AN      X      Y      Z        X      Y      Z        X      Y      Z
     1   6     0.00  -0.10   0.00     0.00   0.10   0.00     0.00   0.00   0.06
     2   6     0.00  -0.02  -0.13     0.00   0.02   0.13     0.00  -0.04  -0.04
     3   6     0.00   0.04   0.05     0.00  -0.04  -0.05     0.00   0.06  -0.04
     4   1     0.00   0.22  -0.28     0.00  -0.22   0.27     0.00  -0.20   0.04
     5   6     0.00  -0.02   0.13     0.00   0.02  -0.13     0.00   0.04  -0.04
     6   1     0.00  -0.11   0.00     0.00   0.11   0.00     0.00   0.00   0.36
     7   6     0.00   0.04  -0.05     0.00  -0.04   0.05     0.00  -0.06  -0.04
     8   1     0.00   0.22   0.28     0.00  -0.22  -0.27     0.00   0.20   0.04
     9   6     0.00   0.02   0.00     0.00  -0.02   0.00     0.00   0.00   0.05
    10   1     0.00   0.25   0.17     0.00  -0.25  -0.17     0.00   0.27   0.06
    11   1     0.00   0.25  -0.17     0.00  -0.25   0.17     0.00  -0.27   0.06
    12   6     0.00  -0.02   0.00    -0.02   0.02   0.00     0.00   0.00   0.01
    13   6     0.00  -0.02   0.00     0.02  -0.02   0.00     0.00   0.00   0.01
    14   1     0.00  -0.03   0.00    -0.03   0.04   0.00    -0.12   0.20  -0.01
    15   1     0.00  -0.03   0.00    -0.03   0.04   0.00     0.12  -0.20  -0.01
    16   6     0.00   0.02   0.00     0.00   0.02   0.00     0.00   0.00   0.05
    17   1     0.00  -0.03   0.00     0.03  -0.04   0.00    -0.12   0.20  -0.01
    18   1     0.00  -0.03   0.00     0.03  -0.04   0.00     0.12  -0.20  -0.01
    19   6     0.00   0.04  -0.05     0.00   0.04  -0.05     0.00  -0.06  -0.04
    20   6     0.00   0.04   0.05     0.00   0.04   0.05     0.00   0.06  -0.04
    21   6     0.00  -0.02   0.13     0.00  -0.02   0.13     0.00   0.04  -0.04
    22   1     0.00   0.25  -0.17     0.00   0.25  -0.17     0.00  -0.27   0.06
    23   6     0.00  -0.02  -0.13     0.00  -0.02  -0.13     0.00  -0.04  -0.04
    24   1     0.00   0.25   0.17     0.00   0.25   0.17     0.00   0.27   0.06
    25   6     0.00  -0.10   0.00     0.00  -0.10   0.00     0.00   0.00   0.06
    26   1     0.00   0.22   0.28     0.00   0.22   0.27     0.00   0.20   0.04
    27   1     0.00  -0.11   0.00     0.00  -0.11   0.00     0.00   0.00   0.36
    28   1     0.00   0.22  -0.28     0.00   0.22  -0.27     0.00  -0.20   0.04
                    40                     41                     42
                    BG                     AU                     BG
 Frequencies --  1105.5142              1156.9865              1175.8142
 Red. masses --     1.4888                 1.1787                 1.1081
 Frc consts  --     1.0720                 0.9296                 0.9026
 IR Inten    --     0.0000                 5.2623                 0.0000
  Atom  AN      X      Y      Z        X      Y      Z        X      Y      Z
     1   6     0.00   0.00  -0.05     0.00   0.00   0.00     0.00   0.00   0.05
     2   6     0.00   0.04   0.03     0.00   0.02   0.00     0.00   0.03  -0.02
     3   6     0.00  -0.07   0.02     0.00  -0.04  -0.02     0.00   0.00  -0.01
     4   1     0.00   0.17  -0.04     0.00   0.08  -0.03     0.00   0.30  -0.17
     5   6     0.00  -0.04   0.03     0.00  -0.02   0.00     0.00  -0.03  -0.02
     6   1     0.00   0.00  -0.36     0.00   0.00  -0.06     0.00   0.00   0.49
     7   6     0.00   0.07   0.02     0.00   0.04  -0.02     0.00   0.00  -0.01
     8   1     0.00  -0.17  -0.04     0.00  -0.08  -0.03     0.00  -0.30  -0.17
     9   6     0.00   0.00  -0.02     0.00   0.00   0.04     0.00   0.00   0.00
    10   1     0.00  -0.33  -0.13     0.01  -0.21  -0.12     0.00  -0.10  -0.06
    11   1     0.00   0.33  -0.13    -0.01   0.21  -0.12     0.00   0.10  -0.06
    12   6     0.00   0.00   0.05     0.00   0.00   0.04     0.00   0.00   0.00
    13   6     0.00   0.00  -0.05     0.00   0.00   0.04     0.00   0.00   0.00
    14   1     0.06   0.11  -0.03    -0.18   0.38  -0.02     0.00  -0.01   0.00
    15   1    -0.06  -0.11  -0.03     0.18  -0.38  -0.02     0.00   0.01   0.00
    16   6     0.00   0.00   0.02     0.00   0.00   0.04     0.00   0.00   0.00
    17   1    -0.06  -0.11   0.03    -0.18   0.38  -0.02     0.00   0.01   0.00
    18   1     0.06   0.11   0.03     0.18  -0.38  -0.02     0.00  -0.01   0.00
    19   6     0.00  -0.07  -0.02     0.00   0.04  -0.02     0.00   0.00   0.01
    20   6     0.00   0.07  -0.02     0.00  -0.04  -0.02     0.00   0.00   0.01
    21   6     0.00   0.04  -0.03     0.00  -0.02   0.00     0.00   0.03   0.02
    22   1     0.00  -0.33   0.13    -0.01   0.21  -0.12     0.00  -0.10   0.06
    23   6     0.00  -0.04  -0.03     0.00   0.02   0.00     0.00  -0.03   0.02
    24   1     0.00   0.33   0.13     0.01  -0.21  -0.12     0.00   0.10   0.06
    25   6     0.00   0.00   0.05     0.00   0.00   0.00     0.00   0.00  -0.05
    26   1     0.00   0.17   0.04     0.00  -0.08  -0.03     0.00   0.30   0.17
    27   1     0.00   0.00   0.36     0.00   0.00  -0.06     0.00   0.00  -0.49
    28   1     0.00  -0.17   0.04     0.00   0.08  -0.03     0.00  -0.30   0.17
                    43                     44                     45
                    AU                     BU                     AG
 Frequencies --  1176.5340              1196.7608              1197.1841
 Red. masses --     1.0985                 1.1309                 1.1310
 Frc consts  --     0.8959                 0.9543                 0.9551
 IR Inten    --     0.0138                 0.1240                 0.0000
  Atom  AN      X      Y      Z        X      Y      Z        X      Y      Z
     1   6     0.00   0.00  -0.05     0.00  -0.01   0.00     0.00   0.01   0.00
     2   6     0.00  -0.03   0.02     0.00  -0.03   0.02     0.00   0.03  -0.02
     3   6     0.00   0.00   0.00     0.00   0.03   0.02     0.00  -0.03  -0.02
     4   1     0.00  -0.29   0.17     0.00  -0.30   0.17     0.00   0.30  -0.17
     5   6     0.00   0.03   0.02     0.00  -0.03  -0.02     0.00   0.03   0.02
     6   1     0.00   0.00  -0.49     0.00  -0.01   0.00     0.00   0.01   0.00
     7   6     0.00   0.00   0.00     0.00   0.03  -0.02     0.00  -0.03   0.02
     8   1     0.00   0.29   0.17     0.00  -0.30  -0.17     0.00   0.30   0.17
     9   6     0.00   0.00   0.01     0.00   0.00   0.00     0.00   0.01   0.00
    10   1     0.00   0.07   0.04     0.00   0.31   0.18     0.00  -0.31  -0.18
    11   1     0.00  -0.07   0.04     0.00   0.31  -0.18     0.00  -0.31   0.18
    12   6     0.00   0.00   0.01     0.00   0.00   0.00     0.00   0.00   0.00
    13   6     0.00   0.00   0.01     0.00   0.00   0.00     0.00   0.00   0.00
    14   1    -0.04   0.08   0.00     0.00   0.00   0.00    -0.01   0.00   0.01
    15   1     0.04  -0.08   0.00     0.00   0.00   0.00    -0.01   0.00  -0.01
    16   6     0.00   0.00   0.01     0.00   0.00   0.00     0.00  -0.01   0.00
    17   1    -0.04   0.08   0.00     0.00   0.00   0.00     0.01   0.00  -0.01
    18   1     0.04  -0.08   0.00     0.00   0.00   0.00     0.01   0.00   0.01
    19   6     0.00   0.00   0.00     0.00   0.03  -0.02     0.00   0.03  -0.02
    20   6     0.00   0.00   0.00     0.00   0.03   0.02     0.00   0.03   0.02
    21   6     0.00   0.03   0.02     0.00  -0.03  -0.02     0.00  -0.03  -0.02
    22   1     0.00  -0.07   0.04     0.00   0.31  -0.18     0.00   0.31  -0.18
    23   6     0.00  -0.03   0.02     0.00  -0.03   0.02     0.00  -0.03   0.02
    24   1     0.00   0.07   0.04     0.00   0.31   0.18     0.00   0.31   0.18
    25   6     0.00   0.00  -0.05     0.00  -0.01   0.00     0.00  -0.01   0.00
    26   1     0.00   0.29   0.17     0.00  -0.30  -0.17     0.00  -0.30  -0.17
    27   1     0.00   0.00  -0.49     0.00  -0.01   0.00     0.00  -0.01   0.00
    28   1     0.00  -0.29   0.17     0.00  -0.30   0.17     0.00  -0.30   0.17
                    46                     47                     48
                    BU                     AG                     BU
 Frequencies --  1218.9389              1219.1859              1285.6325
 Red. masses --     2.4146                 2.6930                 1.4983
 Frc consts  --     2.1138                 2.3584                 1.4591
 IR Inten    --     1.1013                 0.0000                 0.8334
  Atom  AN      X      Y      Z        X      Y      Z        X      Y      Z
     1   6     0.00   0.01   0.00     0.00   0.02   0.00     0.00   0.00   0.00
     2   6     0.00  -0.05  -0.04     0.00  -0.06  -0.05     0.00  -0.02  -0.01
     3   6     0.00   0.03   0.00     0.00   0.04   0.00     0.00   0.01   0.01
     4   1     0.00  -0.21   0.04     0.00  -0.24   0.05     0.00  -0.06   0.01
     5   6     0.00  -0.05   0.04     0.00  -0.06   0.05     0.00  -0.02   0.01
     6   1     0.00   0.01   0.00     0.00   0.01   0.00     0.00   0.00   0.00
     7   6     0.00   0.03   0.00     0.00   0.04   0.00     0.00   0.01  -0.01
     8   1     0.00  -0.21  -0.04     0.00  -0.24  -0.05     0.00  -0.06  -0.01
     9   6     0.02   0.21   0.00     0.02   0.23   0.00    -0.04   0.06   0.00
    10   1     0.00  -0.20  -0.14     0.01  -0.21  -0.15    -0.02  -0.06  -0.04
    11   1     0.00  -0.20   0.14     0.01  -0.21   0.15    -0.02  -0.06   0.04
    12   6    -0.03  -0.07   0.00    -0.01  -0.09   0.00     0.08  -0.10   0.00
    13   6    -0.03  -0.07   0.00     0.01   0.09   0.00     0.08  -0.10   0.00
    14   1     0.12  -0.31   0.01     0.11  -0.27   0.01    -0.31   0.36   0.03
    15   1     0.12  -0.31  -0.01     0.11  -0.27  -0.01    -0.31   0.36  -0.03
    16   6     0.02   0.21   0.00    -0.02  -0.23   0.00    -0.04   0.06   0.00
    17   1     0.12  -0.31   0.01    -0.11   0.27  -0.01    -0.31   0.36   0.03
    18   1     0.12  -0.31  -0.01    -0.11   0.27   0.01    -0.31   0.36  -0.03
    19   6     0.00   0.03   0.00     0.00  -0.04   0.00     0.00   0.01  -0.01
    20   6     0.00   0.03   0.00     0.00  -0.04   0.00     0.00   0.01   0.01
    21   6     0.00  -0.05   0.04     0.00   0.06  -0.05     0.00  -0.02   0.01
    22   1     0.00  -0.20   0.14    -0.01   0.21  -0.15    -0.02  -0.06   0.04
    23   6     0.00  -0.05  -0.04     0.00   0.06   0.05     0.00  -0.02  -0.01
    24   1     0.00  -0.20  -0.14    -0.01   0.21   0.15    -0.02  -0.06  -0.04
    25   6     0.00   0.01   0.00     0.00  -0.02   0.00     0.00   0.00   0.00
    26   1     0.00  -0.21  -0.04     0.00   0.24   0.05     0.00  -0.06  -0.01
    27   1     0.00   0.01   0.00     0.00  -0.01   0.00     0.00   0.00   0.00
    28   1     0.00  -0.21   0.04     0.00   0.24  -0.05     0.00  -0.06   0.01
                    49                     50                     51
                    BG                     AU                     BG
 Frequencies --  1286.6355              1338.0397              1338.2455
 Red. masses --     1.4389                 5.1304                 3.5385
 Frc consts  --     1.4034                 5.4118                 3.7337
 IR Inten    --     0.0000                 0.0002                 0.0000
  Atom  AN      X      Y      Z        X      Y      Z        X      Y      Z
     1   6     0.00   0.00   0.02     0.00   0.00   0.17     0.00   0.00   0.15
     2   6     0.00   0.03  -0.02     0.00   0.15  -0.09     0.00   0.11  -0.06
     3   6     0.00  -0.01  -0.03     0.00  -0.15  -0.08     0.00  -0.13  -0.07
     4   1     0.00  -0.10   0.05     0.00  -0.17   0.09     0.00  -0.05   0.03
     5   6     0.00  -0.03  -0.02     0.00  -0.15  -0.09     0.00  -0.11  -0.06
     6   1     0.00   0.00  -0.01     0.00   0.00  -0.19     0.00   0.00  -0.23
     7   6     0.00   0.01  -0.03     0.00   0.15  -0.08     0.00   0.13  -0.07
     8   1     0.00   0.10   0.05     0.00   0.17   0.09     0.00   0.05   0.03
     9   6     0.00   0.00   0.08     0.00   0.00   0.20     0.00   0.00   0.12
    10   1     0.00  -0.12  -0.09     0.00   0.10   0.06     0.00   0.20   0.13
    11   1     0.00   0.12  -0.09     0.00  -0.10   0.06     0.00  -0.20   0.13
    12   6     0.00   0.00  -0.09     0.00   0.00  -0.04     0.00   0.00   0.02
    13   6     0.00   0.00   0.09     0.00   0.00  -0.04     0.00   0.00  -0.02
    14   1    -0.39   0.24   0.04     0.10  -0.27   0.02     0.21  -0.25   0.01
    15   1     0.39  -0.24   0.04    -0.10   0.27   0.02    -0.21   0.25   0.01
    16   6     0.00   0.00  -0.08     0.00   0.00   0.20     0.00   0.00  -0.12
    17   1     0.39  -0.24  -0.04     0.10  -0.27   0.02    -0.21   0.25  -0.01
    18   1    -0.39   0.24  -0.04    -0.10   0.27   0.02     0.21  -0.25  -0.01
    19   6     0.00  -0.01   0.03     0.00   0.15  -0.08     0.00  -0.13   0.07
    20   6     0.00   0.01   0.03     0.00  -0.15  -0.08     0.00   0.13   0.07
    21   6     0.00   0.03   0.02     0.00  -0.15  -0.09     0.00   0.11   0.06
    22   1     0.00  -0.12   0.09     0.00  -0.10   0.06     0.00   0.20  -0.13
    23   6     0.00  -0.03   0.02     0.00   0.15  -0.09     0.00  -0.11   0.06
    24   1     0.00   0.12   0.09     0.00   0.10   0.06     0.00  -0.20  -0.13
    25   6     0.00   0.00  -0.02     0.00   0.00   0.17     0.00   0.00  -0.15
    26   1     0.00  -0.10  -0.05     0.00   0.17   0.09     0.00  -0.05  -0.03
    27   1     0.00   0.00   0.01     0.00   0.00  -0.19     0.00   0.00   0.23
    28   1     0.00   0.10  -0.05     0.00  -0.17   0.09     0.00   0.05  -0.03
                    52                     53                     54
                    AU                     AG                     BG
 Frequencies --  1349.4894              1353.8748              1354.1357
 Red. masses --     1.2972                 1.4512                 1.2321
 Frc consts  --     1.3919                 1.5673                 1.3311
 IR Inten    --     0.4785                 0.0000                 0.0000
  Atom  AN      X      Y      Z        X      Y      Z        X      Y      Z
     1   6     0.00   0.00   0.04     0.00   0.00   0.00     0.00   0.00  -0.03
     2   6     0.00  -0.01   0.02     0.00   0.01   0.01     0.00   0.02  -0.02
     3   6     0.00  -0.05  -0.01     0.00  -0.01  -0.01     0.00   0.03   0.01
     4   1     0.00   0.23  -0.12     0.00   0.03  -0.01     0.00  -0.22   0.12
     5   6     0.00   0.01   0.02     0.00   0.01  -0.01     0.00  -0.02  -0.02
     6   1     0.00   0.00  -0.21     0.00   0.00   0.00     0.00   0.00   0.19
     7   6     0.00   0.05  -0.01     0.00  -0.01   0.01     0.00  -0.03   0.01
     8   1     0.00  -0.23  -0.12     0.00   0.03   0.01     0.00   0.22   0.12
     9   6     0.00   0.00  -0.07     0.02  -0.03   0.00     0.00   0.00   0.07
    10   1     0.00   0.32   0.19     0.02   0.02   0.01     0.00  -0.28  -0.17
    11   1     0.00  -0.32   0.19     0.02   0.02  -0.01     0.00   0.28  -0.17
    12   6     0.00   0.00   0.02    -0.06   0.13   0.00     0.00   0.00   0.01
    13   6     0.00   0.00   0.02     0.06  -0.13   0.00     0.00   0.00  -0.01
    14   1    -0.04   0.12  -0.01     0.36  -0.33  -0.04     0.15  -0.19   0.00
    15   1     0.04  -0.12  -0.01     0.36  -0.33   0.04    -0.15   0.19   0.00
    16   6     0.00   0.00  -0.07    -0.02   0.03   0.00     0.00   0.00  -0.07
    17   1    -0.04   0.12  -0.01    -0.36   0.33   0.04    -0.15   0.19   0.00
    18   1     0.04  -0.12  -0.01    -0.36   0.33  -0.04     0.15  -0.19   0.00
    19   6     0.00   0.05  -0.01     0.00   0.01  -0.01     0.00   0.03  -0.01
    20   6     0.00  -0.05  -0.01     0.00   0.01   0.01     0.00  -0.03  -0.01
    21   6     0.00   0.01   0.02     0.00  -0.01   0.01     0.00   0.02   0.02
    22   1     0.00  -0.32   0.19    -0.02  -0.02   0.01     0.00  -0.28   0.17
    23   6     0.00  -0.01   0.02     0.00  -0.01  -0.01     0.00  -0.02   0.02
    24   1     0.00   0.32   0.19    -0.02  -0.02  -0.01     0.00   0.28   0.17
    25   6     0.00   0.00   0.04     0.00   0.00   0.00     0.00   0.00   0.03
    26   1     0.00  -0.23  -0.12     0.00  -0.03  -0.01     0.00  -0.22  -0.12
    27   1     0.00   0.00  -0.21     0.00   0.00   0.00     0.00   0.00  -0.19
    28   1     0.00   0.23  -0.12     0.00  -0.03   0.01     0.00   0.22  -0.12
                    55                     56                     57
                    AU                     BG                     AG
 Frequencies --  1476.3373              1477.2132              1480.6072
 Red. masses --     2.1889                 2.1671                 1.1002
 Frc consts  --     2.8109                 2.7862                 1.4210
 IR Inten    --    10.5582                 0.0000                 0.0000
  Atom  AN      X      Y      Z        X      Y      Z        X      Y      Z
     1   6     0.00   0.00   0.09     0.00   0.00  -0.09     0.00   0.01   0.00
     2   6     0.00  -0.10  -0.01     0.00   0.10   0.01     0.00  -0.01   0.00
     3   6     0.00   0.07  -0.04     0.00  -0.07   0.04     0.00   0.00   0.00
     4   1     0.00   0.20  -0.19     0.00  -0.20   0.19     0.00   0.01  -0.01
     5   6     0.00   0.10  -0.01     0.00  -0.10   0.01     0.00  -0.01   0.00
     6   1     0.00   0.00  -0.45     0.00   0.00   0.44     0.00   0.01   0.00
     7   6     0.00  -0.07  -0.04     0.00   0.07   0.04     0.00   0.00   0.00
     8   1     0.00  -0.20  -0.19     0.00   0.20   0.19     0.00   0.01   0.01
     9   6     0.00   0.00   0.11     0.00   0.00  -0.11    -0.01   0.01   0.00
    10   1     0.00  -0.09  -0.14     0.00   0.10   0.14     0.00   0.00   0.00
    11   1     0.00   0.09  -0.14     0.00  -0.10   0.14     0.00   0.00   0.00
    12   6     0.00   0.00  -0.03     0.00   0.00   0.02    -0.04  -0.05   0.00
    13   6     0.00   0.00  -0.03     0.00   0.00  -0.02     0.04   0.05   0.00
    14   1     0.03  -0.12   0.01    -0.05   0.13  -0.01     0.28   0.27  -0.31
    15   1    -0.03   0.12   0.01     0.05  -0.13  -0.01     0.28   0.27   0.31
    16   6     0.00   0.00   0.11     0.00   0.00   0.11     0.01  -0.01   0.00
    17   1     0.03  -0.12   0.01     0.05  -0.13   0.01    -0.28  -0.27   0.31
    18   1    -0.03   0.12   0.01    -0.05   0.13   0.01    -0.28  -0.27  -0.31
    19   6     0.00  -0.07  -0.04     0.00  -0.07  -0.04     0.00   0.00   0.00
    20   6     0.00   0.07  -0.04     0.00   0.07  -0.04     0.00   0.00   0.00
    21   6     0.00   0.10  -0.01     0.00   0.10  -0.01     0.00   0.01   0.00
    22   1     0.00   0.09  -0.14     0.00   0.10  -0.14     0.00   0.00   0.00
    23   6     0.00  -0.10  -0.01     0.00  -0.10  -0.01     0.00   0.01   0.00
    24   1     0.00  -0.09  -0.14     0.00  -0.10  -0.14     0.00   0.00   0.00
    25   6     0.00   0.00   0.09     0.00   0.00   0.09     0.00  -0.01   0.00
    26   1     0.00  -0.20  -0.19     0.00  -0.20  -0.19     0.00  -0.01  -0.01
    27   1     0.00   0.00  -0.45     0.00   0.00  -0.44     0.00  -0.01   0.00
    28   1     0.00   0.20  -0.19     0.00   0.20  -0.19     0.00  -0.01   0.01
                    58                     59                     60
                    BU                     AG                     BU
 Frequencies --  1497.7123              1519.9328              1520.1505
 Red. masses --     1.1009                 2.2270                 2.2810
 Frc consts  --     1.4550                 3.0312                 3.1056
 IR Inten    --     6.4306                 0.0000                30.9729
  Atom  AN      X      Y      Z        X      Y      Z        X      Y      Z
     1   6     0.00   0.00   0.00     0.00   0.07   0.00     0.00  -0.08   0.00
     2   6     0.00   0.00   0.00     0.00  -0.08   0.08     0.00   0.08  -0.08
     3   6     0.00   0.00   0.00     0.00  -0.05  -0.07     0.00   0.05   0.07
     4   1     0.00   0.01   0.00     0.00   0.31  -0.14     0.00  -0.31   0.14
     5   6     0.00   0.00   0.00     0.00  -0.08  -0.08     0.00   0.08   0.08
     6   1     0.00   0.00   0.00     0.00   0.09   0.00     0.00  -0.09   0.00
     7   6     0.00   0.00   0.00     0.00  -0.05   0.07     0.00   0.05  -0.07
     8   1     0.00   0.01   0.00     0.00   0.31   0.14     0.00  -0.31  -0.14
     9   6     0.01  -0.01   0.00     0.00   0.10   0.00     0.00  -0.11   0.00
    10   1     0.00   0.02   0.01     0.00   0.29   0.11     0.00  -0.29  -0.11
    11   1     0.00   0.02  -0.01     0.00   0.29  -0.11     0.00  -0.29   0.11
    12   6     0.04   0.05   0.00     0.00  -0.02   0.00     0.00   0.03   0.00
    13   6     0.04   0.05   0.00     0.00   0.02   0.00     0.00   0.03   0.00
    14   1    -0.30  -0.25   0.31    -0.03  -0.05   0.03     0.00   0.01   0.01
    15   1    -0.30  -0.25  -0.31    -0.03  -0.05  -0.03     0.00   0.01  -0.01
    16   6     0.01  -0.01   0.00     0.00  -0.10   0.00     0.00  -0.11   0.00
    17   1    -0.30  -0.25   0.31     0.03   0.05  -0.03     0.00   0.01   0.01
    18   1    -0.30  -0.25  -0.31     0.03   0.05   0.03     0.00   0.01  -0.01
    19   6     0.00   0.00   0.00     0.00   0.05  -0.07     0.00   0.05  -0.07
    20   6     0.00   0.00   0.00     0.00   0.05   0.07     0.00   0.05   0.07
    21   6     0.00   0.00   0.00     0.00   0.08   0.08     0.00   0.08   0.08
    22   1     0.00   0.02  -0.01     0.00  -0.29   0.11     0.00  -0.29   0.11
    23   6     0.00   0.00   0.00     0.00   0.08  -0.08     0.00   0.08  -0.08
    24   1     0.00   0.02   0.01     0.00  -0.29  -0.11     0.00  -0.29  -0.11
    25   6     0.00   0.00   0.00     0.00  -0.07   0.00     0.00  -0.08   0.00
    26   1     0.00   0.01   0.00     0.00  -0.31  -0.14     0.00  -0.31  -0.14
    27   1     0.00   0.00   0.00     0.00  -0.09   0.00     0.00  -0.09   0.00
    28   1     0.00   0.01   0.00     0.00  -0.31   0.14     0.00  -0.31   0.14
                    61                     62                     63
                    BG                     AU                     BU
 Frequencies --  1619.9415              1619.9873              1640.6048
 Red. masses --     5.5609                 5.5464                 5.7074
 Frc consts  --     8.5979                 8.5760                 9.0510
 IR Inten    --     0.0000                 3.0940                19.5331
  Atom  AN      X      Y      Z        X      Y      Z        X      Y      Z
     1   6     0.00   0.00   0.26     0.00   0.00   0.26     0.00   0.10   0.00
     2   6     0.00   0.05  -0.15     0.00   0.05  -0.15     0.00  -0.19   0.05
     3   6     0.00   0.07   0.13     0.00   0.07   0.13     0.00   0.21   0.06
     4   1     0.00  -0.17  -0.03     0.00  -0.17  -0.03     0.00   0.17  -0.17
     5   6     0.00  -0.05  -0.15     0.00  -0.05  -0.15     0.00  -0.19  -0.05
     6   1     0.00   0.00  -0.34     0.00   0.00  -0.34     0.00   0.11   0.00
     7   6     0.00  -0.07   0.13     0.00  -0.07   0.13     0.00   0.21  -0.06
     8   1     0.00   0.17  -0.03     0.00   0.17  -0.03     0.00   0.17   0.17
     9   6     0.00   0.00  -0.22     0.00   0.00  -0.22     0.00  -0.16   0.00
    10   1     0.00  -0.20  -0.02     0.00  -0.21  -0.02     0.00  -0.21  -0.19
    11   1     0.00   0.20  -0.02     0.00   0.21  -0.02     0.00  -0.21   0.19
    12   6     0.00   0.00   0.02     0.00   0.00   0.02     0.00   0.03   0.00
    13   6     0.00   0.00  -0.02     0.00   0.00   0.02     0.00   0.03   0.00
    14   1    -0.04   0.12  -0.02    -0.03   0.11  -0.01     0.00   0.00   0.01
    15   1     0.04  -0.12  -0.02     0.03  -0.11  -0.01     0.00   0.00  -0.01
    16   6     0.00   0.00   0.22     0.00   0.00  -0.22     0.00  -0.16   0.00
    17   1     0.04  -0.12   0.02    -0.03   0.11  -0.01     0.00   0.00   0.01
    18   1    -0.04   0.12   0.02     0.03  -0.11  -0.01     0.00   0.00  -0.01
    19   6     0.00   0.07  -0.13     0.00  -0.07   0.13     0.00   0.21  -0.06
    20   6     0.00  -0.07  -0.13     0.00   0.07   0.13     0.00   0.21   0.06
    21   6     0.00   0.05   0.15     0.00  -0.05  -0.15     0.00  -0.19  -0.05
    22   1     0.00  -0.20   0.02     0.00   0.21  -0.02     0.00  -0.21   0.19
    23   6     0.00  -0.05   0.15     0.00   0.05  -0.15     0.00  -0.19   0.05
    24   1     0.00   0.20   0.02     0.00  -0.21  -0.02     0.00  -0.21  -0.19
    25   6     0.00   0.00  -0.26     0.00   0.00   0.26     0.00   0.10   0.00
    26   1     0.00  -0.17   0.03     0.00   0.17  -0.03     0.00   0.17   0.17
    27   1     0.00   0.00   0.34     0.00   0.00  -0.34     0.00   0.11   0.00
    28   1     0.00   0.17   0.03     0.00  -0.17  -0.03     0.00   0.17  -0.17
                    64                     65                     66
                    AG                     AG                     BU
 Frequencies --  1641.1822              3020.2599              3030.1475
 Red. masses --     5.6624                 1.0583                 1.0596
 Frc consts  --     8.9859                 5.6878                 5.7322
 IR Inten    --     0.0000                 0.0000                48.6615
  Atom  AN      X      Y      Z        X      Y      Z        X      Y      Z
     1   6     0.00  -0.10   0.00     0.00   0.00   0.00     0.00   0.00   0.00
     2   6     0.00   0.19  -0.05     0.00   0.00   0.00     0.00   0.00   0.00
     3   6     0.00  -0.21  -0.06     0.00   0.00   0.00     0.00   0.00   0.00
     4   1     0.00  -0.17   0.17     0.00   0.00   0.00     0.00   0.00   0.00
     5   6     0.00   0.19   0.05     0.00   0.00   0.00     0.00   0.00   0.00
     6   1     0.00  -0.11   0.00     0.00   0.00   0.00     0.00   0.00   0.00
     7   6     0.00  -0.21   0.06     0.00   0.00   0.00     0.00   0.00   0.00
     8   1     0.00  -0.17  -0.17     0.00   0.00   0.00     0.00   0.00   0.00
     9   6     0.00   0.16   0.00     0.00   0.00   0.00     0.00   0.00   0.00
    10   1     0.00   0.22   0.19     0.00  -0.01   0.01     0.00   0.00   0.01
    11   1     0.00   0.22  -0.19     0.00  -0.01  -0.01     0.00   0.00  -0.01
    12   6    -0.01  -0.02   0.00    -0.04  -0.03   0.00    -0.04  -0.03   0.00
    13   6     0.01   0.02   0.00     0.04   0.03   0.00    -0.04  -0.03   0.00
    14   1     0.01  -0.02  -0.01     0.23   0.17   0.41     0.23   0.17   0.41
    15   1     0.01  -0.02   0.01     0.23   0.17  -0.41     0.23   0.17  -0.41
    16   6     0.00  -0.16   0.00     0.00   0.00   0.00     0.00   0.00   0.00
    17   1    -0.01   0.02   0.01    -0.23  -0.17  -0.41     0.23   0.17   0.41
    18   1    -0.01   0.02  -0.01    -0.23  -0.17   0.41     0.23   0.17  -0.41
    19   6     0.00   0.21  -0.06     0.00   0.00   0.00     0.00   0.00   0.00
    20   6     0.00   0.21   0.06     0.00   0.00   0.00     0.00   0.00   0.00
    21   6     0.00  -0.19  -0.05     0.00   0.00   0.00     0.00   0.00   0.00
    22   1     0.00  -0.22   0.19     0.00   0.01   0.01     0.00   0.00  -0.01
    23   6     0.00  -0.19   0.05     0.00   0.00   0.00     0.00   0.00   0.00
    24   1     0.00  -0.22  -0.19     0.00   0.01  -0.01     0.00   0.00   0.01
    25   6     0.00   0.10   0.00     0.00   0.00   0.00     0.00   0.00   0.00
    26   1     0.00   0.17   0.17     0.00   0.00   0.00     0.00   0.00   0.00
    27   1     0.00   0.11   0.00     0.00   0.00   0.00     0.00   0.00   0.00
    28   1     0.00   0.17  -0.17     0.00   0.00   0.00     0.00   0.00   0.00
                    67                     68                     69
                    BG                     AU                     BU
 Frequencies --  3055.2582              3078.9783              3148.3622
 Red. masses --     1.1026                 1.1059                 1.0862
 Frc consts  --     6.0642                 6.1771                 6.3436
 IR Inten    --     0.0000                23.4487                21.5254
  Atom  AN      X      Y      Z        X      Y      Z        X      Y      Z
     1   6     0.00   0.00   0.00     0.00   0.00   0.00     0.00   0.01   0.00
     2   6     0.00   0.00   0.00     0.00   0.00   0.00     0.00  -0.01  -0.02
     3   6     0.00   0.00   0.00     0.00   0.00   0.00     0.00  -0.02   0.03
     4   1     0.00   0.00   0.00     0.00   0.00   0.00     0.00   0.12   0.22
     5   6     0.00   0.00   0.00     0.00   0.00   0.00     0.00  -0.01   0.02
     6   1     0.00   0.00   0.00     0.00   0.00   0.00     0.00  -0.16   0.00
     7   6     0.00   0.00   0.00     0.00   0.00   0.00     0.00  -0.02  -0.03
     8   1     0.00   0.00   0.00     0.00   0.00   0.00     0.00   0.12  -0.22
     9   6     0.00   0.00   0.00     0.00   0.00   0.00     0.00   0.00   0.00
    10   1     0.00   0.00   0.00     0.00  -0.01   0.01     0.00   0.21  -0.36
    11   1     0.00   0.00   0.00     0.00   0.01   0.01     0.00   0.21   0.36
    12   6     0.00   0.00  -0.07     0.00   0.00   0.07     0.00   0.00   0.00
    13   6     0.00   0.00   0.07     0.00   0.00   0.07     0.00   0.00   0.00
    14   1     0.24   0.18   0.40    -0.24  -0.18  -0.40     0.00   0.00   0.00
    15   1    -0.24  -0.18   0.40     0.24   0.18  -0.40     0.00   0.00   0.00
    16   6     0.00   0.00   0.00     0.00   0.00   0.00     0.00   0.00   0.00
    17   1    -0.24  -0.18  -0.40    -0.24  -0.18  -0.40     0.00   0.00   0.00
    18   1     0.24   0.18  -0.40     0.24   0.18  -0.40     0.00   0.00   0.00
    19   6     0.00   0.00   0.00     0.00   0.00   0.00     0.00  -0.02  -0.03
    20   6     0.00   0.00   0.00     0.00   0.00   0.00     0.00  -0.02   0.03
    21   6     0.00   0.00   0.00     0.00   0.00   0.00     0.00  -0.01   0.02
    22   1     0.00   0.00   0.00     0.00   0.01   0.01     0.00   0.21   0.36
    23   6     0.00   0.00   0.00     0.00   0.00   0.00     0.00  -0.01  -0.02
    24   1     0.00   0.00   0.00     0.00  -0.01   0.01     0.00   0.21  -0.36
    25   6     0.00   0.00   0.00     0.00   0.00   0.00     0.00   0.01   0.00
    26   1     0.00   0.00   0.00     0.00   0.00   0.00     0.00   0.12  -0.22
    27   1     0.00   0.00   0.00     0.00   0.00   0.00     0.00  -0.16   0.00
    28   1     0.00   0.00   0.00     0.00   0.00   0.00     0.00   0.12   0.22
                    70                     71                     72
                    AG                     BG                     AU
 Frequencies --  3148.4503              3149.2946              3149.5842
 Red. masses --     1.0862                 1.0877                 1.0878
 Frc consts  --     6.3439                 6.3560                 6.3577
 IR Inten    --     0.0000                 0.0000                11.1166
  Atom  AN      X      Y      Z        X      Y      Z        X      Y      Z
     1   6     0.00  -0.01   0.00     0.00   0.00   0.00     0.00   0.00   0.00
     2   6     0.00   0.01   0.02     0.00  -0.01  -0.01     0.00   0.01   0.01
     3   6     0.00   0.02  -0.03     0.00  -0.02   0.03     0.00   0.02  -0.03
     4   1     0.00  -0.12  -0.22     0.00   0.09   0.16     0.00  -0.09  -0.16
     5   6     0.00   0.01  -0.02     0.00   0.01  -0.01     0.00  -0.01   0.01
     6   1     0.00   0.16   0.00     0.00   0.00   0.00     0.00   0.00   0.00
     7   6     0.00   0.02   0.03     0.00   0.02   0.03     0.00  -0.02  -0.03
     8   1     0.00  -0.12   0.22     0.00  -0.09   0.16     0.00   0.09  -0.16
     9   6     0.00   0.00   0.00     0.00   0.00   0.00     0.00   0.00   0.00
    10   1     0.00  -0.21   0.36     0.00   0.23  -0.40     0.00  -0.23   0.40
    11   1     0.00  -0.21  -0.36     0.00  -0.23  -0.40     0.00   0.23   0.40
    12   6     0.00   0.00   0.00     0.00   0.00   0.00     0.00   0.00   0.00
    13   6     0.00   0.00   0.00     0.00   0.00   0.00     0.00   0.00   0.00
    14   1     0.00   0.00   0.00     0.00   0.00   0.00     0.01   0.01   0.01
    15   1     0.00   0.00   0.00     0.00   0.00   0.00    -0.01  -0.01   0.01
    16   6     0.00   0.00   0.00     0.00   0.00   0.00     0.00   0.00   0.00
    17   1     0.00   0.00   0.00     0.00   0.00   0.00     0.01   0.01   0.01
    18   1     0.00   0.00   0.00     0.00   0.00   0.00    -0.01  -0.01   0.01
    19   6     0.00  -0.02  -0.03     0.00  -0.02  -0.03     0.00  -0.02  -0.03
    20   6     0.00  -0.02   0.03     0.00   0.02  -0.03     0.00   0.02  -0.03
    21   6     0.00  -0.01   0.02     0.00  -0.01   0.01     0.00  -0.01   0.01
    22   1     0.00   0.21   0.36     0.00   0.23   0.40     0.00   0.23   0.40
    23   6     0.00  -0.01  -0.02     0.00   0.01   0.01     0.00   0.01   0.01
    24   1     0.00   0.21  -0.36     0.00  -0.23   0.40     0.00  -0.23   0.40
    25   6     0.00   0.01   0.00     0.00   0.00   0.00     0.00   0.00   0.00
    26   1     0.00   0.12  -0.22     0.00   0.09  -0.16     0.00   0.09  -0.16
    27   1     0.00  -0.16   0.00     0.00   0.00   0.00     0.00   0.00   0.00
    28   1     0.00   0.12   0.22     0.00  -0.09  -0.16     0.00  -0.09  -0.16
                    73                     74                     75
                    BU                     AG                     BG
 Frequencies --  3164.0781              3164.1576              3173.3791
 Red. masses --     1.0893                 1.0893                 1.0938
 Frc consts  --     6.4250                 6.4256                 6.4899
 IR Inten    --     8.2833                 0.0000                 0.0000
  Atom  AN      X      Y      Z        X      Y      Z        X      Y      Z
     1   6     0.00  -0.04   0.00     0.00  -0.04   0.00     0.00   0.00   0.00
     2   6     0.00   0.01   0.02     0.00   0.01   0.02     0.00  -0.02  -0.04
     3   6     0.00  -0.01   0.02     0.00  -0.01   0.02     0.00   0.01  -0.01
     4   1     0.00  -0.14  -0.23     0.00  -0.14  -0.23     0.00   0.23   0.40
     5   6     0.00   0.01  -0.02     0.00   0.01  -0.02     0.00   0.02  -0.04
     6   1     0.00   0.48   0.00     0.00   0.48   0.00     0.00   0.00   0.00
     7   6     0.00  -0.01  -0.02     0.00  -0.01  -0.02     0.00  -0.01  -0.01
     8   1     0.00  -0.14   0.23     0.00  -0.14   0.23     0.00  -0.23   0.40
     9   6     0.00   0.00   0.00     0.00   0.00   0.00     0.00   0.00   0.00
    10   1     0.00   0.12  -0.22     0.00   0.12  -0.22     0.00  -0.09   0.15
    11   1     0.00   0.12   0.22     0.00   0.12   0.22     0.00   0.09   0.15
    12   6     0.00   0.00   0.00     0.00   0.00   0.00     0.00   0.00   0.00
    13   6     0.00   0.00   0.00     0.00   0.00   0.00     0.00   0.00   0.00
    14   1     0.00   0.00   0.00     0.00   0.00   0.00     0.00   0.00   0.00
    15   1     0.00   0.00   0.00     0.00   0.00   0.00     0.00   0.00   0.00
    16   6     0.00   0.00   0.00     0.00   0.00   0.00     0.00   0.00   0.00
    17   1     0.00   0.00   0.00     0.00   0.00   0.00     0.00   0.00   0.00
    18   1     0.00   0.00   0.00     0.00   0.00   0.00     0.00   0.00   0.00
    19   6     0.00  -0.01  -0.02     0.00   0.01   0.02     0.00   0.01   0.01
    20   6     0.00  -0.01   0.02     0.00   0.01  -0.02     0.00  -0.01   0.01
    21   6     0.00   0.01  -0.02     0.00  -0.01   0.02     0.00  -0.02   0.04
    22   1     0.00   0.12   0.22     0.00  -0.12  -0.22     0.00  -0.09  -0.15
    23   6     0.00   0.01   0.02     0.00  -0.01  -0.02     0.00   0.02   0.04
    24   1     0.00   0.12  -0.22     0.00  -0.12   0.22     0.00   0.09  -0.15
    25   6     0.00  -0.04   0.00     0.00   0.04   0.00     0.00   0.00   0.00
    26   1     0.00  -0.14   0.23     0.00   0.14  -0.23     0.00   0.23  -0.40
    27   1     0.00   0.48   0.00     0.00  -0.48   0.00     0.00   0.00   0.00
    28   1     0.00  -0.14  -0.23     0.00   0.14   0.23     0.00  -0.23  -0.40
                    76                     77                     78
                    AU                     BU                     AG
 Frequencies --  3173.4497              3186.2135              3186.3654
 Red. masses --     1.0938                 1.0983                 1.0983
 Frc consts  --     6.4903                 6.5691                 6.5697
 IR Inten    --    64.0685                40.3686                 0.0000
  Atom  AN      X      Y      Z        X      Y      Z        X      Y      Z
     1   6     0.00   0.00   0.00     0.00   0.04   0.00     0.00  -0.04   0.00
     2   6     0.00   0.02   0.04     0.00   0.01   0.03     0.00  -0.01  -0.03
     3   6     0.00  -0.01   0.01     0.00  -0.01   0.01     0.00   0.01  -0.01
     4   1     0.00  -0.23  -0.40     0.00  -0.17  -0.29     0.00   0.17   0.30
     5   6     0.00  -0.02   0.04     0.00   0.01  -0.03     0.00  -0.01   0.03
     6   1     0.00   0.00   0.00     0.00  -0.50   0.00     0.00   0.49   0.00
     7   6     0.00   0.01   0.01     0.00  -0.01  -0.01     0.00   0.01   0.01
     8   1     0.00   0.23  -0.40     0.00  -0.17   0.29     0.00   0.17  -0.30
     9   6     0.00   0.00   0.00     0.00   0.00   0.00     0.00   0.00   0.00
    10   1     0.00   0.09  -0.16     0.00   0.05  -0.09     0.00  -0.05   0.09
    11   1     0.00  -0.09  -0.16     0.00   0.05   0.09     0.00  -0.05  -0.09
    12   6     0.00   0.00   0.00     0.00   0.00   0.00     0.00   0.00   0.00
    13   6     0.00   0.00   0.00     0.00   0.00   0.00     0.00   0.00   0.00
    14   1     0.00   0.00   0.00     0.00   0.00   0.00     0.00   0.00   0.00
    15   1     0.00   0.00   0.00     0.00   0.00   0.00     0.00   0.00   0.00
    16   6     0.00   0.00   0.00     0.00   0.00   0.00     0.00   0.00   0.00
    17   1     0.00   0.00   0.00     0.00   0.00   0.00     0.00   0.00   0.00
    18   1     0.00   0.00   0.00     0.00   0.00   0.00     0.00   0.00   0.00
    19   6     0.00   0.01   0.01     0.00  -0.01  -0.01     0.00  -0.01  -0.01
    20   6     0.00  -0.01   0.01     0.00  -0.01   0.01     0.00  -0.01   0.01
    21   6     0.00  -0.02   0.04     0.00   0.01  -0.03     0.00   0.01  -0.03
    22   1     0.00  -0.09  -0.16     0.00   0.05   0.09     0.00   0.05   0.09
    23   6     0.00   0.02   0.04     0.00   0.01   0.03     0.00   0.01   0.03
    24   1     0.00   0.09  -0.16     0.00   0.05  -0.09     0.00   0.05  -0.09
    25   6     0.00   0.00   0.00     0.00   0.04   0.00     0.00   0.04   0.00
    26   1     0.00   0.23  -0.40     0.00  -0.17   0.29     0.00  -0.17   0.30
    27   1     0.00   0.00   0.00     0.00  -0.50   0.00     0.00  -0.49   0.00
    28   1     0.00  -0.23  -0.40     0.00  -0.17  -0.29     0.00  -0.17  -0.30
    
    
    
    Vibrational Energies and Rotational Constants (cm-1)
 Mode(Quanta)     E(harm)     E(anharm)    Aa(z)       Ba(x)       Ca(y)
 Equilibrium Geometry                     0.082519    0.008899    0.008225
 Ground State   51935.834    51317.866    0.081691    0.008834    0.008172
 Fundamental Bands (DE w.r.t. Ground State)
  1(1)           3186.365     3055.236    0.081670    0.008834    0.008172
  2(1)           3164.158     3039.125    0.081672    0.008834    0.008172
  3(1)           3148.450     3001.816    0.081674    0.008834    0.008171
  4(1)           3020.260     2944.670    0.081680    0.008833    0.008171
  5(1)           1641.182     1599.618    0.081620    0.008829    0.008172
  6(1)           1519.933     1486.087    0.081639    0.008833    0.008171
  7(1)           1480.607     1460.000    0.081694    0.008834    0.008171
  8(1)           1353.875     1328.356    0.081636    0.008830    0.008171
  9(1)           1219.186     1192.952    0.081633    0.008825    0.008163
 10(1)           1197.184     1180.524    0.081678    0.008835    0.008172
 11(1)           1046.312     1026.665    0.081661    0.008835    0.008171
 12(1)           1012.538      990.201    0.081692    0.008833    0.008172
 13(1)           1011.751      991.638    0.081692    0.008832    0.008170
 14(1)            993.422      975.257    0.081627    0.008833    0.008172
 15(1)            918.733      900.980    0.081628    0.008833    0.008172
 16(1)            857.258      844.221    0.081647    0.008831    0.008170
 17(1)            752.072      737.450    0.081661    0.008831    0.008170
 18(1)            712.349      698.649    0.081708    0.008834    0.008172
 19(1)            620.992      611.862    0.081563    0.008834    0.008167
 20(1)            478.282      468.409    0.081696    0.008830    0.008169
 21(1)            234.919      230.031    0.081647    0.008830    0.008169
 22(1)            118.816      109.056    0.081706    0.008836    0.008176
 23(1)           3173.450     3057.780    0.081672    0.008834    0.008172
 24(1)           3149.584     3013.111    0.081675    0.008834    0.008171
 25(1)           3078.978     2924.978    0.081684    0.008832    0.008170
 26(1)           1619.987     1578.868    0.081625    0.008831    0.008164
 27(1)           1476.337     1449.692    0.081691    0.008831    0.008168
 28(1)           1349.489     1326.484    0.081698    0.008834    0.008172
 29(1)           1338.040     1316.319    0.081609    0.008829    0.008168
 30(1)           1176.534     1161.155    0.081731    0.008834    0.008172
 31(1)           1156.987     1134.220    0.081660    0.008835    0.008172
 32(1)           1083.592     1063.053    0.081707    0.008833    0.008173
 33(1)            972.608      956.866    0.081643    0.008833    0.008172
 34(1)            853.370      831.463    0.081697    0.008834    0.008172
 35(1)            765.719      757.966    0.081649    0.008827    0.008167
 36(1)            632.589      625.511    0.081669    0.008834    0.008172
 37(1)            411.679      403.330    0.081668    0.008835    0.008173
 38(1)            369.341      369.885    0.081871    0.008833    0.008171
 39(1)             35.469       15.181    0.081056    0.008844    0.008171
 40(1)             21.171       -4.532    0.081693    0.008823    0.008180
 41(1)           3173.379     3057.378    0.081672    0.008834    0.008172
 42(1)           3149.295     3012.748    0.081675    0.008834    0.008171
 43(1)           3055.258     2904.134    0.081688    0.008832    0.008170
 44(1)           1619.942     1579.509    0.081625    0.008831    0.008164
 45(1)           1477.213     1450.316    0.081693    0.008831    0.008168
 46(1)           1354.136     1328.321    0.081684    0.008835    0.008172
 47(1)           1338.246     1317.689    0.081609    0.008830    0.008168
 48(1)           1286.636     1257.270    0.081638    0.008834    0.008172
 49(1)           1175.814     1161.338    0.081727    0.008834    0.008172
 50(1)           1105.514     1082.152    0.081719    0.008832    0.008171
 51(1)            991.523      974.097    0.081550    0.008829    0.008168
 52(1)            972.462      956.225    0.081644    0.008833    0.008172
 53(1)            853.342      831.279    0.081678    0.008834    0.008172
 54(1)            631.329      623.901    0.081777    0.008834    0.008178
 55(1)            411.280      402.971    0.081665    0.008835    0.008173
 56(1)            313.245      312.045    0.081767    0.008828    0.008167
 57(1)             54.428       30.107    0.081715    0.008828    0.008164
 58(1)           3186.213     3055.266    0.081670    0.008834    0.008172
 59(1)           3164.078     3039.292    0.081672    0.008834    0.008172
 60(1)           3148.362     3001.661    0.081674    0.008834    0.008171
 61(1)           3030.148     2864.947    0.081677    0.008833    0.008171
 62(1)           1640.605     1599.138    0.081620    0.008829    0.008173
 63(1)           1520.151     1485.406    0.081637    0.008833    0.008171
 64(1)           1497.712     1499.826    0.081680    0.008834    0.008172
 65(1)           1285.632     1261.066    0.081648    0.008831    0.008170
 66(1)           1218.939     1193.166    0.081637    0.008825    0.008164
 67(1)           1196.761     1180.436    0.081678    0.008835    0.008172
 68(1)           1045.806     1029.352    0.081661    0.008834    0.008169
 69(1)           1011.527      998.913    0.081702    0.008834    0.008171
 70(1)            994.310      975.664    0.081632    0.008833    0.008172
 71(1)            919.927      902.448    0.081648    0.008835    0.008173
 72(1)            800.711      786.465    0.081640    0.008828    0.008167
 73(1)            769.567      754.940    0.081663    0.008833    0.008172
 74(1)            712.560      698.582    0.081710    0.008834    0.008172
 75(1)            532.128      522.197    0.081688    0.008833    0.008172
 76(1)            528.921      524.139    0.081687    0.008833    0.008171
 77(1)            290.407      284.603    0.081471    0.008834    0.008173
 78(1)             60.594       53.932    0.082384    0.008836    0.008176
 
 
