# Supplementary material for: Low-energy vibrational spectra of flexible diphenyl molecules: biphenyl, diphenylmethane, bibenzyl and 2-, 3- and 4-phenyltoluene
Source: Royal Society of Chemistry journal article supplement (doi:10.1039/c4cp03278k), 2014-01-01
Supplement: c4cp03278k5.log [file c4cp03278k5.log]

Harmonic frequencies (cm**-1), IR intensities (KM/Mole), Raman scattering
 activities (A**4/AMU), depolarization ratios for plane and unpolarized
 incident light, reduced masses (AMU), force constants (mDyne/A),
 and normal coordinates:
                     1                      2                      3
                     B                      A                      A
 Frequencies --    28.0063                29.1452                47.3808
 Red. masses --     3.6978                 4.3400                 4.2508
 Frc consts  --     0.0017                 0.0022                 0.0056
 IR Inten    --     0.1039                 0.0008                 0.0069
  Atom  AN      X      Y      Z        X      Y      Z        X      Y      Z
     1   6     0.07   0.01   0.01    -0.04   0.15   0.06     0.07   0.15   0.05
     2   6    -0.06  -0.11  -0.02    -0.12   0.09  -0.05     0.14   0.21   0.06
     3   6    -0.12  -0.12  -0.02    -0.11   0.03  -0.10     0.11   0.15   0.02
     4   1    -0.13  -0.20  -0.05    -0.20   0.08  -0.10     0.23   0.31   0.10
     5   6     0.15   0.12   0.05     0.06   0.16   0.12    -0.04   0.02   0.00
     6   1     0.11   0.02   0.01    -0.05   0.20   0.10     0.10   0.20   0.09
     7   6     0.09   0.11   0.05     0.07   0.11   0.07    -0.07  -0.04  -0.04
     8   1     0.25   0.21   0.07     0.13   0.21   0.21    -0.10  -0.04  -0.01
     9   6    -0.04  -0.01   0.02    -0.01   0.04  -0.04     0.00   0.03  -0.03
    10   1    -0.22  -0.21  -0.05    -0.17  -0.02  -0.18     0.16   0.20   0.03
    11   1     0.16   0.20   0.08     0.15   0.11   0.12    -0.15  -0.14  -0.08
    12   6    -0.09  -0.01   0.02     0.01  -0.01  -0.08     0.00  -0.01  -0.06
    13   6    -0.09  -0.01  -0.02    -0.01   0.01  -0.08     0.00   0.01  -0.06
    14   1    -0.13  -0.01   0.02     0.05  -0.04  -0.06     0.02  -0.02  -0.05
    15   1    -0.09  -0.01   0.07     0.00  -0.03  -0.12     0.00  -0.01  -0.08
    16   6    -0.04  -0.01  -0.02     0.01  -0.04  -0.04     0.00  -0.03  -0.03
    17   1    -0.09  -0.01  -0.07     0.00   0.03  -0.12     0.00   0.01  -0.08
    18   1    -0.13  -0.01  -0.02    -0.05   0.04  -0.06    -0.02   0.02  -0.05
    19   6     0.09   0.11  -0.05    -0.07  -0.11   0.07     0.07   0.04  -0.04
    20   6    -0.12  -0.12   0.02     0.11  -0.03  -0.10    -0.11  -0.15   0.02
    21   6     0.15   0.12  -0.05    -0.06  -0.16   0.12     0.04  -0.02   0.00
    22   1     0.16   0.20  -0.08    -0.15  -0.11   0.12     0.15   0.14  -0.08
    23   6    -0.06  -0.11   0.02     0.12  -0.09  -0.05    -0.14  -0.21   0.06
    24   1    -0.22  -0.21   0.05     0.17   0.02  -0.18    -0.16  -0.20   0.03
    25   6     0.07   0.01  -0.01     0.04  -0.15   0.06    -0.07  -0.15   0.05
    26   1     0.25   0.21  -0.07    -0.13  -0.21   0.21     0.10   0.04  -0.01
    27   1     0.11   0.02  -0.01     0.05  -0.20   0.10    -0.10  -0.20   0.09
    28   1    -0.13  -0.20   0.05     0.20  -0.08  -0.10    -0.23  -0.31   0.10
                     4                      5                      6
                     A                      B                      A
 Frequencies --   118.6849               122.2004               227.5415
 Red. masses --     3.4505                 4.3228                 4.4324
 Frc consts  --     0.0286                 0.0380                 0.1352
 IR Inten    --     0.0302                 1.2038                 0.3128
  Atom  AN      X      Y      Z        X      Y      Z        X      Y      Z
     1   6    -0.09  -0.05   0.03    -0.10  -0.15  -0.02    -0.11  -0.07  -0.11
     2   6    -0.02   0.02  -0.03    -0.03  -0.10   0.05     0.01   0.03   0.00
     3   6     0.09   0.02  -0.05     0.06   0.03   0.14     0.11   0.16   0.08
     4   1    -0.07   0.07  -0.06    -0.07  -0.17   0.04     0.00  -0.02   0.00
     5   6    -0.03  -0.10   0.08    -0.04  -0.04   0.00     0.00   0.06  -0.06
     6   1    -0.19  -0.06   0.04    -0.19  -0.27  -0.10    -0.24  -0.22  -0.21
     7   6     0.09  -0.10   0.05     0.05   0.09   0.09     0.10   0.19   0.03
     8   1    -0.08  -0.15   0.12    -0.07  -0.07  -0.06    -0.03   0.03  -0.11
     9   6     0.14  -0.05  -0.02     0.08   0.11   0.14     0.07   0.14   0.06
    10   1     0.13   0.06  -0.10     0.09   0.05   0.19     0.16   0.20   0.14
    11   1     0.13  -0.15   0.08     0.08   0.15   0.10     0.13   0.26   0.04
    12   6     0.12  -0.10  -0.06     0.00   0.08   0.12    -0.01   0.03   0.00
    13   6    -0.12   0.10  -0.06     0.00   0.08  -0.12     0.01  -0.03   0.00
    14   1     0.29  -0.11  -0.03    -0.14   0.01   0.14    -0.04  -0.05   0.04
    15   1     0.04  -0.29  -0.17     0.01   0.10   0.22     0.00   0.04   0.01
    16   6    -0.14   0.05  -0.02     0.08   0.11  -0.14    -0.07  -0.14   0.06
    17   1    -0.04   0.29  -0.17     0.01   0.10  -0.22     0.00  -0.04   0.01
    18   1    -0.29   0.11  -0.03    -0.14   0.01  -0.14     0.04   0.05   0.04
    19   6    -0.09   0.10   0.05     0.05   0.09  -0.09    -0.10  -0.19   0.03
    20   6    -0.09  -0.02  -0.05     0.06   0.03  -0.14    -0.11  -0.16   0.08
    21   6     0.03   0.10   0.08    -0.04  -0.04   0.00     0.00  -0.06  -0.06
    22   1    -0.13   0.15   0.08     0.08   0.15  -0.10    -0.13  -0.26   0.04
    23   6     0.02  -0.02  -0.03    -0.03  -0.10  -0.05    -0.01  -0.03   0.00
    24   1    -0.13  -0.06  -0.10     0.09   0.05  -0.19    -0.16  -0.20   0.14
    25   6     0.09   0.05   0.03    -0.10  -0.15   0.02     0.11   0.07  -0.11
    26   1     0.08   0.15   0.12    -0.07  -0.07   0.06     0.03  -0.03  -0.11
    27   1     0.19   0.06   0.04    -0.19  -0.27   0.10     0.24   0.22  -0.21
    28   1     0.07  -0.07  -0.06    -0.07  -0.17  -0.04     0.00   0.02   0.00
                     7                      8                      9
                     B                      B                      A
 Frequencies --   322.5968               361.8585               366.8131
 Red. masses --     2.8914                 2.6455                 1.9657
 Frc consts  --     0.1773                 0.2041                 0.1558
 IR Inten    --     0.4293                 0.0519                 0.1130
  Atom  AN      X      Y      Z        X      Y      Z        X      Y      Z
     1   6     0.08   0.00   0.02     0.06   0.05   0.08    -0.04   0.01   0.00
     2   6     0.00  -0.07   0.05    -0.03  -0.03  -0.01     0.00   0.04  -0.03
     3   6    -0.09  -0.03   0.08    -0.03  -0.08  -0.05     0.05  -0.01  -0.06
     4   1     0.02  -0.13   0.07    -0.07  -0.02  -0.04    -0.01   0.10  -0.04
     5   6    -0.01   0.01  -0.04    -0.04  -0.05   0.02     0.00  -0.02   0.03
     6   1     0.18   0.03   0.02     0.15   0.14   0.13    -0.08   0.01   0.02
     7   6    -0.12   0.03   0.01    -0.03  -0.08  -0.02     0.08  -0.04  -0.01
     8   1     0.00   0.03  -0.11    -0.07  -0.08   0.02    -0.01  -0.04   0.08
     9   6    -0.07   0.06   0.07     0.07   0.02   0.00     0.05  -0.04  -0.05
    10   1    -0.13  -0.07   0.14    -0.08  -0.12  -0.09     0.07   0.02  -0.11
    11   1    -0.17   0.05  -0.04    -0.06  -0.16  -0.03     0.13  -0.06   0.02
    12   6     0.17   0.02  -0.03     0.03   0.15   0.09    -0.08   0.07   0.08
    13   6     0.17   0.02   0.03     0.03   0.15  -0.09     0.08  -0.07   0.08
    14   1     0.37  -0.09   0.06    -0.24   0.21   0.02    -0.39   0.18  -0.02
    15   1     0.17   0.04  -0.30     0.07   0.24   0.35    -0.02   0.22   0.39
    16   6    -0.07   0.06  -0.07     0.07   0.02   0.00    -0.05   0.04  -0.05
    17   1     0.17   0.04   0.30     0.07   0.24  -0.35     0.02  -0.22   0.39
    18   1     0.37  -0.09  -0.06    -0.24   0.21  -0.02     0.39  -0.18  -0.02
    19   6    -0.12   0.03  -0.01    -0.03  -0.08   0.02    -0.08   0.04  -0.01
    20   6    -0.09  -0.03  -0.08    -0.03  -0.08   0.05    -0.05   0.01  -0.06
    21   6    -0.01   0.01   0.04    -0.04  -0.05  -0.02     0.00   0.02   0.03
    22   1    -0.17   0.05   0.04    -0.06  -0.16   0.03    -0.13   0.06   0.02
    23   6     0.00  -0.07  -0.05    -0.03  -0.03   0.01     0.00  -0.04  -0.03
    24   1    -0.13  -0.07  -0.14    -0.08  -0.12   0.09    -0.07  -0.02  -0.11
    25   6     0.08   0.00  -0.02     0.06   0.05  -0.08     0.04  -0.01   0.00
    26   1     0.00   0.03   0.11    -0.07  -0.08  -0.02     0.01   0.04   0.08
    27   1     0.18   0.03  -0.02     0.15   0.14  -0.13     0.08  -0.01   0.02
    28   1     0.02  -0.13  -0.07    -0.07  -0.02   0.04     0.01  -0.10  -0.04
                    10                     11                     12
                     B                      A                      A
 Frequencies --   411.3647               412.4196               483.3100
 Red. masses --     2.9168                 2.9173                 3.9656
 Frc consts  --     0.2908                 0.2924                 0.5458
 IR Inten    --     0.0525                 0.0061                 0.4031
  Atom  AN      X      Y      Z        X      Y      Z        X      Y      Z
     1   6     0.00   0.00   0.00    -0.01   0.00   0.00     0.07   0.16  -0.04
     2   6     0.10   0.09   0.06    -0.10  -0.08  -0.06    -0.10   0.01  -0.06
     3   6    -0.11  -0.09  -0.05     0.11   0.09   0.05    -0.04   0.03  -0.01
     4   1     0.23   0.19   0.12    -0.22  -0.19  -0.12    -0.20  -0.15  -0.10
     5   6    -0.10  -0.09  -0.06     0.10   0.09   0.06    -0.04  -0.04  -0.09
     6   1     0.00   0.00   0.00    -0.01   0.00   0.00     0.13   0.21  -0.01
     7   6     0.10   0.09   0.06    -0.10  -0.09  -0.05     0.02  -0.02  -0.06
     8   1    -0.22  -0.19  -0.12     0.22   0.19   0.13    -0.18  -0.16  -0.09
     9   6     0.00   0.00   0.00     0.00  -0.01  -0.01     0.15   0.07   0.12
    10   1    -0.23  -0.20  -0.11     0.24   0.20   0.11    -0.13  -0.04  -0.15
    11   1     0.22   0.20   0.12    -0.21  -0.20  -0.11    -0.14  -0.06  -0.15
    12   6     0.01   0.00   0.00    -0.01   0.01   0.01     0.07  -0.01   0.16
    13   6     0.01   0.00   0.00     0.01  -0.01   0.01    -0.07   0.01   0.16
    14   1     0.02   0.00   0.00    -0.03   0.01   0.00     0.12  -0.02   0.17
    15   1     0.00   0.00  -0.01     0.00   0.02   0.02     0.03  -0.11   0.16
    16   6     0.00   0.00   0.00     0.00   0.01  -0.01    -0.15  -0.07   0.12
    17   1     0.00   0.00   0.01     0.00  -0.02   0.02    -0.03   0.11   0.16
    18   1     0.02   0.00   0.00     0.03  -0.01   0.00    -0.12   0.02   0.17
    19   6     0.10   0.09  -0.06     0.10   0.09  -0.05    -0.02   0.02  -0.06
    20   6    -0.11  -0.09   0.05    -0.11  -0.09   0.05     0.04  -0.03  -0.01
    21   6    -0.10  -0.09   0.06    -0.10  -0.09   0.06     0.04   0.04  -0.09
    22   1     0.22   0.20  -0.12     0.21   0.20  -0.11     0.14   0.06  -0.15
    23   6     0.10   0.09  -0.06     0.10   0.08  -0.06     0.10  -0.01  -0.06
    24   1    -0.23  -0.20   0.11    -0.24  -0.20   0.11     0.13   0.04  -0.15
    25   6     0.00   0.00   0.00     0.01   0.00   0.00    -0.07  -0.16  -0.04
    26   1    -0.22  -0.19   0.12    -0.22  -0.19   0.13     0.18   0.16  -0.09
    27   1     0.00   0.00   0.00     0.01   0.00   0.00    -0.13  -0.21  -0.01
    28   1     0.23   0.19  -0.12     0.22   0.19  -0.12     0.20   0.15  -0.10
                    13                     14                     15
                     B                      A                      B
 Frequencies --   510.8874               543.0416               586.6658
 Red. masses --     3.8593                 3.7774                 2.6644
 Frc consts  --     0.5935                 0.6563                 0.5403
 IR Inten    --    13.0939                 2.8124                16.9539
  Atom  AN      X      Y      Z        X      Y      Z        X      Y      Z
     1   6    -0.04  -0.15   0.08    -0.09   0.01  -0.14    -0.08  -0.01  -0.09
     2   6     0.09  -0.03   0.04     0.01   0.10   0.02     0.01   0.07   0.05
     3   6     0.05  -0.05  -0.01    -0.06   0.02   0.01    -0.07  -0.01   0.02
     4   1     0.15   0.14   0.06     0.19   0.15   0.13     0.19   0.14   0.15
     5   6     0.01   0.03   0.10     0.09   0.04  -0.03     0.07   0.04  -0.01
     6   1    -0.07  -0.17   0.07    -0.12   0.00  -0.14    -0.05   0.00  -0.09
     7   6    -0.04   0.01   0.05     0.02  -0.04  -0.05    -0.01  -0.04  -0.04
     8   1     0.14   0.15   0.08     0.21   0.14   0.12     0.21   0.15   0.11
     9   6    -0.11  -0.02  -0.13    -0.10  -0.16   0.02    -0.07  -0.11   0.02
    10   1     0.13   0.00   0.14     0.07   0.15  -0.03     0.06   0.11   0.02
    11   1     0.12   0.01   0.15     0.10   0.14  -0.03     0.07   0.12  -0.01
    12   6    -0.01   0.16  -0.10     0.06  -0.06   0.16     0.11   0.00   0.10
    13   6    -0.01   0.16   0.10    -0.06   0.06   0.16     0.11   0.00  -0.10
    14   1     0.06   0.29  -0.16     0.29   0.04   0.12    -0.21   0.00   0.06
    15   1     0.00   0.18  -0.13     0.02  -0.17  -0.02     0.20   0.23   0.28
    16   6    -0.11  -0.02   0.13     0.10   0.16   0.02    -0.07  -0.11  -0.02
    17   1     0.00   0.18   0.13    -0.02   0.17  -0.02     0.20   0.23  -0.28
    18   1     0.06   0.29   0.16    -0.29  -0.04   0.12    -0.21   0.00  -0.06
    19   6    -0.04   0.01  -0.05    -0.02   0.04  -0.05    -0.01  -0.04   0.04
    20   6     0.05  -0.05   0.01     0.06  -0.02   0.01    -0.07  -0.01  -0.02
    21   6     0.01   0.03  -0.10    -0.09  -0.04  -0.03     0.07   0.04   0.01
    22   1     0.12   0.01  -0.15    -0.10  -0.14  -0.03     0.07   0.12   0.01
    23   6     0.09  -0.03  -0.04    -0.01  -0.10   0.02     0.01   0.07  -0.05
    24   1     0.13   0.00  -0.14    -0.07  -0.15  -0.03     0.06   0.11  -0.02
    25   6    -0.04  -0.15  -0.08     0.09  -0.01  -0.14    -0.08  -0.01   0.09
    26   1     0.14   0.15  -0.08    -0.21  -0.14   0.12     0.21   0.15  -0.11
    27   1    -0.07  -0.17  -0.07     0.12   0.00  -0.14    -0.05   0.00   0.09
    28   1     0.15   0.14  -0.06    -0.19  -0.15   0.13     0.19   0.14  -0.15
                    16                     17                     18
                     A                      B                      B
 Frequencies --   631.0434               631.4645               711.4428
 Red. masses --     6.2817                 6.2395                 1.7324
 Frc consts  --     1.4738                 1.4659                 0.5166
 IR Inten    --     0.0366                 0.2341                76.8956
  Atom  AN      X      Y      Z        X      Y      Z        X      Y      Z
     1   6     0.07  -0.04  -0.05    -0.07   0.05   0.05    -0.04  -0.03  -0.01
     2   6     0.09   0.03  -0.23    -0.10  -0.03   0.23     0.07   0.06   0.03
     3   6    -0.12   0.17  -0.05     0.12  -0.17   0.06    -0.03  -0.03  -0.02
     4   1     0.14  -0.06  -0.18    -0.16   0.05   0.18    -0.09  -0.07  -0.06
     5   6     0.14  -0.20   0.05    -0.14   0.19  -0.05     0.07   0.06   0.04
     6   1    -0.14   0.11   0.11     0.14  -0.10  -0.11    -0.29  -0.26  -0.15
     7   6    -0.07  -0.04   0.20     0.08   0.04  -0.20    -0.04  -0.03  -0.02
     8   1     0.17  -0.16  -0.06    -0.18   0.14   0.05    -0.10  -0.08  -0.05
     9   6    -0.06   0.05   0.05     0.07  -0.05  -0.05     0.05   0.05   0.02
    10   1    -0.14   0.14   0.05     0.14  -0.14  -0.05    -0.25  -0.22  -0.13
    11   1    -0.13   0.05   0.16     0.12  -0.06  -0.16    -0.25  -0.22  -0.13
    12   6    -0.01   0.02   0.02     0.02  -0.02  -0.02    -0.01   0.00   0.00
    13   6     0.01  -0.02   0.02     0.02  -0.02   0.02    -0.01   0.00   0.00
    14   1    -0.07   0.01   0.01     0.09  -0.02  -0.01     0.04  -0.01   0.02
    15   1     0.00   0.06   0.06     0.01  -0.05  -0.07    -0.02  -0.04  -0.02
    16   6     0.06  -0.05   0.05     0.07  -0.05   0.05     0.05   0.05  -0.02
    17   1     0.00  -0.06   0.06     0.01  -0.05   0.07    -0.02  -0.04   0.02
    18   1     0.07  -0.01   0.01     0.09  -0.02   0.01     0.04  -0.01  -0.02
    19   6     0.07   0.04   0.20     0.08   0.04   0.20    -0.04  -0.03   0.02
    20   6     0.12  -0.17  -0.05     0.12  -0.17  -0.06    -0.03  -0.03   0.02
    21   6    -0.14   0.20   0.05    -0.14   0.19   0.05     0.07   0.06  -0.04
    22   1     0.13  -0.05   0.16     0.12  -0.06   0.16    -0.25  -0.22   0.13
    23   6    -0.09  -0.03  -0.23    -0.10  -0.03  -0.23     0.07   0.06  -0.03
    24   1     0.14  -0.14   0.05     0.14  -0.14   0.05    -0.25  -0.22   0.13
    25   6    -0.07   0.04  -0.05    -0.07   0.05  -0.05    -0.04  -0.03   0.01
    26   1    -0.17   0.16  -0.06    -0.18   0.14  -0.05    -0.10  -0.08   0.05
    27   1     0.14  -0.11   0.11     0.14  -0.10   0.11    -0.29  -0.26   0.15
    28   1    -0.14   0.06  -0.18    -0.16   0.05  -0.18    -0.09  -0.07   0.06
                    19                     20                     21
                     A                      A                      B
 Frequencies --   712.5773               751.2746               765.1444
 Red. masses --     1.7445                 2.7385                 1.7054
 Frc consts  --     0.5219                 0.9107                 0.5883
 IR Inten    --     8.8483                 2.3748                41.6025
  Atom  AN      X      Y      Z        X      Y      Z        X      Y      Z
     1   6     0.03   0.03   0.02    -0.04  -0.10   0.03     0.06   0.04   0.03
     2   6    -0.07  -0.06  -0.03     0.06  -0.01  -0.07     0.00  -0.01   0.00
     3   6     0.03   0.03   0.02     0.01  -0.06  -0.09     0.04   0.04   0.03
     4   1     0.09   0.07   0.05     0.23   0.29  -0.01    -0.24  -0.22  -0.13
     5   6    -0.07  -0.06  -0.04    -0.06   0.07   0.02    -0.01   0.01  -0.01
     6   1     0.29   0.26   0.15     0.20   0.12   0.16    -0.21  -0.20  -0.12
     7   6     0.04   0.03   0.02    -0.10   0.01  -0.01     0.03   0.05   0.03
     8   1     0.10   0.08   0.05     0.20   0.31   0.03    -0.24  -0.19  -0.14
     9   6    -0.05  -0.05  -0.02     0.07   0.10   0.00    -0.09  -0.07  -0.05
    10   1     0.25   0.22   0.13     0.09   0.01   0.01    -0.05  -0.03  -0.01
    11   1     0.26   0.22   0.13     0.03   0.06   0.07    -0.04  -0.01  -0.01
    12   6     0.00   0.00   0.00     0.07   0.04   0.09     0.05  -0.03  -0.01
    13   6     0.00   0.00   0.00    -0.07  -0.04   0.09     0.05  -0.03   0.01
    14   1     0.01   0.02  -0.01     0.16   0.04   0.10    -0.20   0.04  -0.08
    15   1     0.00  -0.01  -0.02     0.04  -0.04   0.03     0.13   0.19   0.15
    16   6     0.05   0.05  -0.02    -0.07  -0.10   0.00    -0.09  -0.07   0.05
    17   1     0.00   0.01  -0.02    -0.04   0.04   0.03     0.13   0.19  -0.15
    18   1    -0.01  -0.02  -0.01    -0.16  -0.04   0.10    -0.20   0.04   0.08
    19   6    -0.04  -0.03   0.02     0.10  -0.01  -0.01     0.03   0.05  -0.03
    20   6    -0.03  -0.03   0.02    -0.01   0.06  -0.09     0.04   0.04  -0.03
    21   6     0.07   0.06  -0.04     0.06  -0.07   0.02    -0.01   0.01   0.01
    22   1    -0.26  -0.22   0.13    -0.03  -0.06   0.07    -0.04  -0.01   0.01
    23   6     0.07   0.06  -0.03    -0.06   0.01  -0.07     0.00  -0.01   0.00
    24   1    -0.25  -0.22   0.13    -0.09  -0.01   0.01    -0.05  -0.03   0.01
    25   6    -0.03  -0.03   0.02     0.04   0.10   0.03     0.06   0.04  -0.03
    26   1    -0.10  -0.08   0.05    -0.20  -0.31   0.03    -0.24  -0.19   0.14
    27   1    -0.29  -0.26   0.15    -0.20  -0.12   0.16    -0.21  -0.20   0.12
    28   1    -0.09  -0.07   0.05    -0.23  -0.29  -0.01    -0.24  -0.22   0.13
                    22                     23                     24
                     A                      B                      B
 Frequencies --   774.4337               778.6137               852.6970
 Red. masses --     2.5255                 3.4945                 1.2513
 Frc consts  --     0.8924                 1.2482                 0.5361
 IR Inten    --     4.2181                 6.2910                 0.0069
  Atom  AN      X      Y      Z        X      Y      Z        X      Y      Z
     1   6    -0.06  -0.01  -0.08     0.00   0.08  -0.07     0.00   0.00   0.00
     2   6    -0.04   0.01   0.07    -0.08   0.02   0.11     0.03   0.03   0.02
     3   6    -0.08  -0.02   0.04    -0.05   0.03   0.09     0.04   0.03   0.02
     4   1     0.22   0.12   0.23    -0.08  -0.18   0.14    -0.23  -0.21  -0.12
     5   6     0.06  -0.05  -0.01     0.10  -0.11  -0.01    -0.03  -0.03  -0.02
     6   1     0.21   0.22   0.06    -0.12   0.00  -0.11     0.01   0.00   0.00
     7   6     0.00  -0.08  -0.03     0.11  -0.08  -0.02    -0.04  -0.03  -0.02
     8   1     0.26   0.11   0.19    -0.03  -0.25   0.12     0.25   0.21   0.13
     9   6     0.10   0.06   0.07    -0.02  -0.06   0.02     0.01   0.00   0.00
    10   1    -0.03   0.04   0.03    -0.05   0.04   0.01    -0.25  -0.22  -0.13
    11   1     0.03   0.01  -0.02     0.05  -0.05  -0.06     0.25   0.22   0.13
    12   6    -0.03   0.00  -0.11    -0.06   0.14  -0.06     0.00   0.00  -0.01
    13   6     0.03   0.00  -0.11    -0.06   0.14   0.06     0.00   0.00   0.01
    14   1    -0.26  -0.11  -0.07     0.26   0.20  -0.06    -0.01   0.00  -0.01
    15   1    -0.01   0.05   0.07    -0.13  -0.05  -0.28     0.00   0.01   0.00
    16   6    -0.10  -0.06   0.07    -0.02  -0.06  -0.02     0.01   0.00   0.00
    17   1     0.01  -0.05   0.07    -0.13  -0.05   0.28     0.00   0.01   0.00
    18   1     0.26   0.11  -0.07     0.26   0.20   0.06    -0.01   0.00   0.01
    19   6     0.00   0.08  -0.03     0.11  -0.08   0.02    -0.04  -0.03   0.02
    20   6     0.08   0.02   0.04    -0.05   0.03  -0.09     0.04   0.03  -0.02
    21   6    -0.06   0.05  -0.01     0.10  -0.11   0.01    -0.03  -0.03   0.02
    22   1    -0.03  -0.01  -0.02     0.05  -0.05   0.06     0.25   0.22  -0.13
    23   6     0.04  -0.01   0.07    -0.08   0.02  -0.11     0.03   0.03  -0.02
    24   1     0.03  -0.04   0.03    -0.05   0.04  -0.01    -0.25  -0.22   0.13
    25   6     0.06   0.01  -0.08     0.00   0.08   0.07     0.00   0.00   0.00
    26   1    -0.26  -0.11   0.19    -0.03  -0.25  -0.12     0.25   0.21  -0.13
    27   1    -0.21  -0.22   0.06    -0.12   0.00   0.11     0.01   0.00   0.00
    28   1    -0.22  -0.12   0.23    -0.08  -0.18  -0.14    -0.23  -0.21   0.12
                    25                     26                     27
                     A                      B                      A
 Frequencies --   853.7506               900.6837               915.9067
 Red. masses --     1.2495                 1.4838                 1.4254
 Frc consts  --     0.5366                 0.7092                 0.7045
 IR Inten    --     0.0507                 0.4265                 0.2037
  Atom  AN      X      Y      Z        X      Y      Z        X      Y      Z
     1   6     0.00   0.00   0.00    -0.04  -0.04  -0.03     0.05   0.04   0.02
     2   6    -0.04  -0.03  -0.02    -0.02  -0.01   0.03     0.00   0.00   0.01
     3   6    -0.04  -0.03  -0.02     0.01   0.04   0.04    -0.05  -0.04  -0.02
     4   1     0.24   0.21   0.13     0.07   0.01   0.09    -0.02  -0.03   0.01
     5   6     0.04   0.03   0.02     0.01  -0.02   0.00     0.01   0.00   0.00
     6   1     0.01   0.01   0.01     0.27   0.21   0.11    -0.28  -0.25  -0.16
     7   6     0.04   0.03   0.02     0.03   0.03   0.02    -0.05  -0.04  -0.03
     8   1    -0.24  -0.21  -0.12     0.05   0.02   0.02    -0.04  -0.04  -0.02
     9   6     0.00   0.00   0.00     0.01   0.02  -0.01     0.03   0.03   0.01
    10   1     0.25   0.22   0.13    -0.24  -0.17  -0.07     0.27   0.24   0.15
    11   1    -0.25  -0.22  -0.13    -0.23  -0.20  -0.11     0.28   0.24   0.14
    12   6     0.00   0.01   0.00     0.01  -0.03  -0.09     0.03   0.03  -0.01
    13   6     0.00  -0.01   0.00     0.01  -0.03   0.09    -0.03  -0.03  -0.01
    14   1     0.01   0.00   0.00    -0.21   0.09  -0.18    -0.03   0.00  -0.01
    15   1     0.00   0.00  -0.01     0.09   0.16   0.12     0.03   0.02   0.03
    16   6     0.00   0.00   0.00     0.01   0.02   0.01    -0.03  -0.03   0.01
    17   1     0.00   0.00  -0.01     0.09   0.16  -0.12    -0.03  -0.02   0.03
    18   1    -0.01   0.00   0.00    -0.21   0.09   0.18     0.03   0.00  -0.01
    19   6    -0.04  -0.03   0.02     0.03   0.03  -0.02     0.05   0.04  -0.03
    20   6     0.04   0.03  -0.02     0.01   0.04  -0.04     0.05   0.04  -0.02
    21   6    -0.04  -0.03   0.02     0.01  -0.02   0.00    -0.01   0.00   0.00
    22   1     0.25   0.22  -0.13    -0.23  -0.20   0.11    -0.28  -0.24   0.14
    23   6     0.04   0.03  -0.02    -0.02  -0.01  -0.03     0.00   0.00   0.01
    24   1    -0.25  -0.22   0.13    -0.24  -0.17   0.07    -0.27  -0.24   0.15
    25   6     0.00   0.00   0.00    -0.04  -0.04   0.03    -0.05  -0.04   0.02
    26   1     0.24   0.21  -0.12     0.05   0.02  -0.02     0.04   0.04  -0.02
    27   1    -0.01  -0.01   0.01     0.27   0.21  -0.11     0.28   0.25  -0.16
    28   1    -0.24  -0.21   0.13     0.07   0.01  -0.09     0.02   0.03   0.01
                    28                     29                     30
                     A                      B                      A
 Frequencies --   942.1821               949.2709               972.8504
 Red. masses --     2.2373                 2.0656                 1.3650
 Frc consts  --     1.1702                 1.0967                 0.7612
 IR Inten    --     0.2814                 5.5451                 0.0014
  Atom  AN      X      Y      Z        X      Y      Z        X      Y      Z
     1   6    -0.02   0.00   0.00     0.04   0.02   0.01     0.01   0.00   0.01
     2   6    -0.02   0.01   0.04    -0.03  -0.01   0.04     0.04   0.04   0.02
     3   6     0.00   0.00   0.01    -0.07  -0.02   0.00    -0.05  -0.04  -0.02
     4   1    -0.05  -0.03   0.03     0.07   0.01   0.11    -0.23  -0.20  -0.12
     5   6     0.05  -0.06   0.01     0.02  -0.01   0.00    -0.05  -0.04  -0.03
     6   1     0.00   0.06   0.05    -0.16  -0.20  -0.13    -0.03  -0.03  -0.01
     7   6     0.05  -0.02  -0.03    -0.05  -0.04  -0.02     0.04   0.04   0.02
     8   1     0.05  -0.08   0.10     0.00  -0.02  -0.02     0.27   0.24   0.14
     9   6    -0.02   0.04  -0.03     0.08   0.08   0.01     0.00   0.00   0.00
    10   1    -0.04  -0.03   0.00     0.16   0.19   0.13     0.23   0.21   0.12
    11   1     0.02  -0.08  -0.04     0.22   0.19   0.12    -0.24  -0.21  -0.12
    12   6     0.03   0.20   0.02     0.00  -0.06  -0.13     0.00  -0.01   0.00
    13   6    -0.03  -0.20   0.02     0.00  -0.06   0.13     0.00   0.01   0.00
    14   1     0.39   0.21   0.05    -0.25   0.08  -0.23    -0.01  -0.01   0.00
    15   1     0.03   0.22  -0.40     0.07   0.11   0.17     0.00  -0.01   0.01
    16   6     0.02  -0.04  -0.03     0.08   0.08  -0.01     0.00   0.00   0.00
    17   1    -0.03  -0.22  -0.40     0.07   0.11  -0.17     0.00   0.01   0.01
    18   1    -0.39  -0.21   0.05    -0.25   0.08   0.23     0.01   0.01   0.00
    19   6    -0.05   0.02  -0.03    -0.05  -0.04   0.02    -0.04  -0.04   0.02
    20   6     0.00   0.00   0.01    -0.07  -0.02   0.00     0.05   0.04  -0.02
    21   6    -0.05   0.06   0.01     0.02  -0.01   0.00     0.05   0.04  -0.03
    22   1    -0.02   0.08  -0.04     0.22   0.19  -0.12     0.24   0.21  -0.12
    23   6     0.02  -0.01   0.04    -0.03  -0.01  -0.04    -0.04  -0.04   0.02
    24   1     0.04   0.03   0.00     0.16   0.19  -0.13    -0.23  -0.21   0.12
    25   6     0.02   0.00   0.00     0.04   0.02  -0.01    -0.01   0.00   0.01
    26   1    -0.05   0.08   0.10     0.00  -0.02   0.02    -0.27  -0.24   0.14
    27   1     0.00  -0.06   0.05    -0.16  -0.20   0.13     0.03   0.03  -0.01
    28   1     0.05   0.03   0.03     0.07   0.01  -0.11     0.23   0.20  -0.12
                    31                     32                     33
                     B                      A                      B
 Frequencies --   973.1286               993.6277               994.2244
 Red. masses --     1.3663                 1.2871                 1.2716
 Frc consts  --     0.7623                 0.7487                 0.7406
 IR Inten    --     0.1117                 0.0584                 0.2344
  Atom  AN      X      Y      Z        X      Y      Z        X      Y      Z
     1   6    -0.01   0.00   0.00     0.04   0.04   0.02    -0.04  -0.04  -0.02
     2   6    -0.04  -0.04  -0.03    -0.04  -0.04  -0.03     0.04   0.04   0.02
     3   6     0.05   0.04   0.02     0.02   0.01   0.01    -0.02  -0.02  -0.01
     4   1     0.22   0.20   0.11     0.26   0.25   0.13    -0.27  -0.24  -0.14
     5   6     0.05   0.04   0.03    -0.03  -0.03  -0.02     0.04   0.03   0.02
     6   1     0.03   0.04   0.02    -0.30  -0.24  -0.14     0.28   0.24   0.15
     7   6    -0.04  -0.04  -0.02     0.01   0.01   0.00    -0.01  -0.01  -0.01
     8   1    -0.27  -0.24  -0.14     0.23   0.19   0.13    -0.23  -0.20  -0.12
     9   6    -0.01   0.00   0.00     0.00   0.01   0.01     0.00   0.00   0.00
    10   1    -0.24  -0.21  -0.13    -0.13  -0.13  -0.07     0.15   0.14   0.08
    11   1     0.23   0.20   0.12    -0.10  -0.09  -0.06     0.12   0.10   0.06
    12   6     0.00   0.00   0.01    -0.03   0.00   0.01     0.00   0.00  -0.01
    13   6     0.00   0.00  -0.01     0.03   0.00   0.01     0.00   0.00   0.01
    14   1     0.02  -0.01   0.02     0.04  -0.03   0.03    -0.01   0.00  -0.01
    15   1     0.00   0.00  -0.01    -0.03   0.00  -0.06     0.00   0.00   0.01
    16   6    -0.01   0.00   0.00     0.00  -0.01   0.01     0.00   0.00   0.00
    17   1     0.00   0.00   0.01     0.03   0.00  -0.06     0.00   0.00  -0.01
    18   1     0.02  -0.01  -0.02    -0.04   0.03   0.03    -0.01   0.00   0.01
    19   6    -0.04  -0.04   0.02    -0.01  -0.01   0.00    -0.01  -0.01   0.01
    20   6     0.05   0.04  -0.02    -0.02  -0.01   0.01    -0.02  -0.02   0.01
    21   6     0.05   0.04  -0.03     0.03   0.03  -0.02     0.04   0.03  -0.02
    22   1     0.23   0.20  -0.12     0.10   0.09  -0.06     0.12   0.10  -0.06
    23   6    -0.04  -0.04   0.03     0.04   0.04  -0.03     0.04   0.04  -0.02
    24   1    -0.24  -0.21   0.13     0.13   0.13  -0.07     0.15   0.14  -0.08
    25   6    -0.01   0.00   0.00    -0.04  -0.04   0.02    -0.04  -0.04   0.02
    26   1    -0.27  -0.24   0.14    -0.23  -0.19   0.13    -0.23  -0.20   0.12
    27   1     0.03   0.04  -0.02     0.30   0.24  -0.14     0.28   0.24  -0.15
    28   1     0.22   0.20  -0.11    -0.26  -0.25   0.13    -0.27  -0.24   0.14
                    34                     35                     36
                     A                      B                      A
 Frequencies --  1008.5704              1011.6804              1011.7202
 Red. masses --     2.2951                 6.2749                 6.0674
 Frc consts  --     1.3755                 3.7839                 3.6591
 IR Inten    --     0.0515                 0.3076                 0.0314
  Atom  AN      X      Y      Z        X      Y      Z        X      Y      Z
     1   6     0.02   0.00  -0.02     0.04  -0.17   0.21    -0.05   0.17  -0.20
     2   6    -0.04  -0.01   0.05     0.02  -0.01  -0.04    -0.01   0.01   0.03
     3   6     0.00   0.03   0.02    -0.19   0.21   0.03     0.19  -0.21  -0.03
     4   1     0.06  -0.02   0.11     0.04   0.00  -0.02    -0.06   0.00  -0.01
     5   6    -0.01   0.00  -0.01    -0.03   0.03   0.01     0.03  -0.03   0.00
     6   1     0.06  -0.09  -0.10     0.03  -0.18   0.22    -0.05   0.21  -0.19
     7   6    -0.02   0.03   0.06     0.15  -0.04  -0.24    -0.14   0.03   0.22
     8   1     0.07   0.08  -0.06    -0.03   0.02   0.02     0.01  -0.04   0.00
     9   6     0.00  -0.03  -0.05     0.00  -0.01   0.02    -0.01   0.02  -0.01
    10   1    -0.10  -0.04  -0.07    -0.22   0.18   0.04     0.25  -0.17  -0.02
    11   1    -0.13  -0.08   0.01     0.18  -0.06  -0.23    -0.16   0.06   0.21
    12   6     0.20   0.04  -0.04     0.00  -0.01   0.02    -0.03   0.02   0.00
    13   6    -0.20  -0.04  -0.04     0.00  -0.01  -0.02     0.03  -0.02   0.00
    14   1    -0.15   0.30  -0.23     0.01  -0.02   0.03     0.05  -0.05   0.05
    15   1     0.21   0.07   0.37     0.01   0.02  -0.04    -0.04   0.01  -0.09
    16   6     0.00   0.03  -0.05     0.00  -0.01  -0.02     0.01  -0.02  -0.01
    17   1    -0.21  -0.07   0.37     0.01   0.02   0.04     0.04  -0.01  -0.09
    18   1     0.15  -0.30  -0.23     0.01  -0.02  -0.03    -0.05   0.05   0.05
    19   6     0.02  -0.03   0.06     0.15  -0.04   0.24     0.14  -0.03   0.22
    20   6     0.00  -0.03   0.02    -0.19   0.21  -0.03    -0.19   0.21  -0.03
    21   6     0.01   0.00  -0.01    -0.03   0.03  -0.01    -0.03   0.03   0.00
    22   1     0.13   0.08   0.01     0.18  -0.06   0.23     0.16  -0.06   0.21
    23   6     0.04   0.01   0.05     0.02  -0.01   0.04     0.01  -0.01   0.03
    24   1     0.10   0.04  -0.07    -0.22   0.18  -0.04    -0.25   0.17  -0.02
    25   6    -0.02   0.00  -0.02     0.04  -0.17  -0.21     0.05  -0.17  -0.20
    26   1    -0.07  -0.08  -0.06    -0.03   0.02  -0.02    -0.01   0.04   0.00
    27   1    -0.06   0.09  -0.10     0.03  -0.18  -0.22     0.05  -0.21  -0.19
    28   1    -0.06   0.02   0.11     0.04   0.00   0.02     0.06   0.00  -0.01
                    37                     38                     39
                     B                      A                      B
 Frequencies --  1045.8977              1047.1201              1089.1347
 Red. masses --     2.2176                 2.1642                 1.5790
 Frc consts  --     1.4293                 1.3981                 1.1036
 IR Inten    --     4.5573                 2.5433                 9.0263
  Atom  AN      X      Y      Z        X      Y      Z        X      Y      Z
     1   6     0.01  -0.06   0.08    -0.01   0.06  -0.08     0.04  -0.03  -0.03
     2   6    -0.09   0.05   0.08     0.09  -0.05  -0.08    -0.02   0.00   0.05
     3   6     0.03   0.00  -0.05    -0.03   0.00   0.05    -0.03   0.06  -0.03
     4   1    -0.23   0.27  -0.03     0.23  -0.27   0.03     0.05  -0.12   0.12
     5   6     0.10  -0.08  -0.06    -0.09   0.07   0.06    -0.04   0.05  -0.01
     6   1     0.01  -0.06   0.10    -0.01   0.06  -0.09     0.26  -0.18  -0.19
     7   6    -0.04   0.05   0.00     0.04  -0.05   0.00    -0.02  -0.02   0.07
     8   1     0.16  -0.01  -0.31    -0.16   0.00   0.31     0.00   0.11  -0.19
     9   6    -0.01   0.01  -0.02     0.00  -0.01   0.01     0.03  -0.04  -0.02
    10   1     0.08   0.07  -0.27    -0.09  -0.07   0.27     0.00   0.13  -0.28
    11   1    -0.16   0.24  -0.11     0.15  -0.24   0.10     0.08  -0.20   0.17
    12   6     0.00  -0.01   0.02     0.02   0.03  -0.01     0.01   0.02   0.02
    13   6     0.00  -0.01  -0.02    -0.02  -0.03  -0.01     0.01   0.02  -0.02
    14   1     0.00  -0.05   0.04     0.01   0.04  -0.03     0.08   0.12  -0.03
    15   1     0.00  -0.01   0.00     0.03   0.05  -0.02    -0.08  -0.22   0.09
    16   6    -0.01   0.01   0.02     0.00   0.01   0.01     0.03  -0.04   0.02
    17   1     0.00  -0.01   0.00    -0.03  -0.05  -0.02    -0.08  -0.22  -0.09
    18   1     0.00  -0.05  -0.04    -0.01  -0.04  -0.03     0.08   0.12   0.03
    19   6    -0.04   0.05   0.00    -0.04   0.05   0.00    -0.02  -0.02  -0.07
    20   6     0.03   0.00   0.05     0.03   0.00   0.05    -0.03   0.06   0.03
    21   6     0.10  -0.08   0.06     0.09  -0.07   0.06    -0.04   0.05   0.01
    22   1    -0.16   0.24   0.11    -0.15   0.24   0.10     0.08  -0.20  -0.17
    23   6    -0.09   0.05  -0.08    -0.09   0.05  -0.08    -0.02   0.00  -0.05
    24   1     0.08   0.07   0.27     0.09   0.07   0.27     0.00   0.13   0.28
    25   6     0.01  -0.06  -0.08     0.01  -0.06  -0.08     0.04  -0.03   0.03
    26   1     0.16  -0.01   0.31     0.16   0.00   0.31     0.00   0.11   0.19
    27   1     0.01  -0.06  -0.10     0.01  -0.06  -0.09     0.26  -0.18   0.19
    28   1    -0.23   0.27   0.03    -0.23   0.27   0.03     0.05  -0.12  -0.12
                    40                     41                     42
                     A                      B                      A
 Frequencies --  1103.9110              1162.2254              1175.5653
 Red. masses --     1.5564                 1.2063                 1.1082
 Frc consts  --     1.1175                 0.9600                 0.9023
 IR Inten    --     4.3607                 1.3829                 0.0000
  Atom  AN      X      Y      Z        X      Y      Z        X      Y      Z
     1   6    -0.04   0.03   0.03    -0.01   0.01   0.00    -0.03   0.02   0.02
     2   6     0.02   0.01  -0.05     0.00  -0.02   0.03     0.02  -0.03   0.01
     3   6     0.03  -0.05   0.04     0.01   0.01  -0.04     0.00   0.00   0.00
     4   1    -0.05   0.13  -0.12     0.05  -0.09   0.07     0.16  -0.26   0.14
     5   6     0.03  -0.04   0.01     0.01   0.00  -0.01     0.01   0.01  -0.03
     6   1    -0.26   0.18   0.20     0.01  -0.01  -0.02    -0.34   0.23   0.25
     7   6     0.01   0.04  -0.07     0.02  -0.03   0.01     0.01  -0.01   0.00
     8   1     0.00  -0.09   0.16     0.02   0.01  -0.04     0.08   0.10  -0.32
     9   6    -0.03   0.00   0.02    -0.03   0.05  -0.01     0.00   0.00   0.00
    10   1    -0.04  -0.15   0.30     0.05   0.06  -0.17     0.03   0.03  -0.10
    11   1    -0.15   0.26  -0.20     0.14  -0.21   0.10     0.06  -0.10   0.05
    12   6     0.06  -0.01  -0.02    -0.03  -0.01   0.01     0.00   0.00   0.00
    13   6    -0.06   0.01  -0.02    -0.03  -0.01  -0.01     0.00   0.00   0.00
    14   1    -0.10  -0.01  -0.03    -0.10  -0.30   0.17    -0.01  -0.01   0.00
    15   1     0.07   0.02   0.11     0.12   0.39  -0.26     0.00   0.00   0.01
    16   6     0.03   0.00   0.02    -0.03   0.05   0.01     0.00   0.00   0.00
    17   1    -0.07  -0.02   0.11     0.12   0.39   0.26     0.00   0.00   0.01
    18   1     0.10   0.01  -0.03    -0.10  -0.30  -0.17     0.01   0.01   0.00
    19   6    -0.01  -0.04  -0.07     0.02  -0.03  -0.01    -0.01   0.01   0.00
    20   6    -0.03   0.05   0.04     0.01   0.01   0.04     0.00   0.00   0.00
    21   6    -0.03   0.04   0.01     0.01   0.00   0.01    -0.01  -0.01  -0.03
    22   1     0.15  -0.26  -0.20     0.14  -0.21  -0.10    -0.06   0.10   0.05
    23   6    -0.02  -0.01  -0.05     0.00  -0.02  -0.03    -0.02   0.03   0.01
    24   1     0.04   0.15   0.30     0.05   0.06   0.17    -0.03  -0.03  -0.10
    25   6     0.04  -0.03   0.03    -0.01   0.01   0.00     0.03  -0.02   0.02
    26   1     0.00   0.09   0.16     0.02   0.01   0.04    -0.08  -0.10  -0.32
    27   1     0.26  -0.18   0.20     0.01  -0.01   0.02     0.34  -0.23   0.25
    28   1     0.05  -0.13  -0.12     0.05  -0.09  -0.07    -0.16   0.26   0.14
                    43                     44                     45
                     B                      B                      A
 Frequencies --  1176.2392              1197.8767              1198.1549
 Red. masses --     1.0979                 1.1388                 1.1320
 Frc consts  --     0.8950                 0.9628                 0.9575
 IR Inten    --     0.0673                 0.2135                 1.3133
  Atom  AN      X      Y      Z        X      Y      Z        X      Y      Z
     1   6     0.03  -0.02  -0.02     0.00   0.00   0.00     0.00   0.00  -0.01
     2   6    -0.01   0.02  -0.01     0.02  -0.03   0.02    -0.02   0.03  -0.01
     3   6     0.00   0.00   0.00     0.01   0.01  -0.04    -0.01  -0.01   0.04
     4   1    -0.15   0.25  -0.13     0.17  -0.28   0.15    -0.17   0.27  -0.14
     5   6    -0.01  -0.01   0.03    -0.01  -0.01   0.03     0.01   0.01  -0.03
     6   1     0.34  -0.24  -0.26    -0.01   0.00   0.01     0.00   0.00  -0.01
     7   6     0.00   0.00   0.00    -0.02   0.03  -0.02     0.02  -0.03   0.01
     8   1    -0.08  -0.11   0.33    -0.07  -0.10   0.32     0.07   0.10  -0.30
     9   6    -0.01   0.01   0.00     0.00   0.00  -0.01     0.00   0.01  -0.01
    10   1    -0.02  -0.02   0.07     0.07   0.10  -0.32    -0.08  -0.11   0.35
    11   1    -0.04   0.06  -0.03    -0.17   0.27  -0.14     0.17  -0.27   0.14
    12   6    -0.01   0.00   0.00     0.00   0.00   0.00     0.00  -0.01   0.00
    13   6    -0.01   0.00   0.00     0.00   0.00   0.00     0.00   0.01   0.00
    14   1    -0.02  -0.07   0.04    -0.01  -0.01   0.00     0.02   0.04  -0.02
    15   1     0.03   0.09  -0.06    -0.01  -0.02   0.00     0.00   0.00   0.02
    16   6    -0.01   0.01   0.00     0.00   0.00   0.01     0.00  -0.01  -0.01
    17   1     0.03   0.09   0.06    -0.01  -0.02   0.00     0.00   0.00   0.02
    18   1    -0.02  -0.07  -0.04    -0.01  -0.01   0.00    -0.02  -0.04  -0.02
    19   6     0.00   0.00   0.00    -0.02   0.03   0.02    -0.02   0.03   0.01
    20   6     0.00   0.00   0.00     0.01   0.01   0.04     0.01   0.01   0.04
    21   6    -0.01  -0.01  -0.03    -0.01  -0.01  -0.03    -0.01  -0.01  -0.03
    22   1    -0.04   0.06   0.03    -0.17   0.27   0.14    -0.17   0.27   0.14
    23   6    -0.01   0.02   0.01     0.02  -0.03  -0.02     0.02  -0.03  -0.01
    24   1    -0.02  -0.02  -0.07     0.07   0.10   0.32     0.08   0.11   0.35
    25   6     0.03  -0.02   0.02     0.00   0.00   0.00     0.00   0.00  -0.01
    26   1    -0.08  -0.11  -0.33    -0.07  -0.10  -0.32    -0.07  -0.10  -0.30
    27   1     0.34  -0.24   0.26    -0.01   0.00  -0.01     0.00   0.00  -0.01
    28   1    -0.15   0.25   0.13     0.17  -0.28  -0.15     0.17  -0.27  -0.14
                    46                     47                     48
                     A                      B                      A
 Frequencies --  1207.7673              1214.6860              1235.3422
 Red. masses --     1.8208                 2.2820                 1.6557
 Frc consts  --     1.5649                 1.9838                 1.4887
 IR Inten    --     0.7560                 0.9923                 1.8391
  Atom  AN      X      Y      Z        X      Y      Z        X      Y      Z
     1   6     0.00   0.01  -0.01     0.00  -0.01   0.01     0.01  -0.01   0.00
     2   6    -0.02   0.00   0.04     0.02   0.01  -0.06     0.01   0.01  -0.04
     3   6    -0.02   0.01   0.00     0.01  -0.02   0.01    -0.01  -0.01   0.03
     4   1     0.07  -0.14   0.11    -0.04   0.13  -0.12    -0.01   0.05  -0.06
     5   6     0.02  -0.04   0.02    -0.04   0.05  -0.02    -0.03   0.03   0.00
     6   1    -0.04   0.03   0.02     0.02  -0.02   0.00    -0.03   0.01   0.02
     7   6    -0.02   0.03  -0.02     0.00  -0.02   0.02    -0.01   0.00   0.02
     8   1     0.00  -0.07   0.12    -0.01   0.10  -0.15     0.01   0.08  -0.14
     9   6     0.03   0.08  -0.11     0.04  -0.11   0.17     0.07  -0.08   0.09
    10   1    -0.05  -0.03   0.22     0.09   0.07  -0.29     0.04   0.03  -0.08
    11   1     0.01   0.02   0.00    -0.11   0.18  -0.07    -0.12   0.20  -0.07
    12   6    -0.06  -0.07   0.04    -0.04   0.02  -0.06    -0.05   0.01  -0.04
    13   6     0.06   0.07   0.04    -0.04   0.02   0.06     0.05  -0.01  -0.04
    14   1     0.21   0.40  -0.19     0.04   0.19  -0.14     0.17   0.49  -0.29
    15   1    -0.13  -0.26   0.15     0.08   0.34  -0.22    -0.04   0.05  -0.11
    16   6    -0.03  -0.08  -0.11     0.04  -0.11  -0.17    -0.07   0.08   0.09
    17   1     0.13   0.26   0.15     0.08   0.34   0.22     0.04  -0.05  -0.11
    18   1    -0.21  -0.40  -0.19     0.04   0.19   0.14    -0.17  -0.49  -0.29
    19   6     0.02  -0.03  -0.02     0.00  -0.02  -0.02     0.01   0.00   0.02
    20   6     0.02  -0.01   0.00     0.01  -0.02  -0.01     0.01   0.01   0.03
    21   6    -0.02   0.04   0.02    -0.04   0.05   0.02     0.03  -0.03   0.00
    22   1    -0.01  -0.02   0.00    -0.11   0.18   0.07     0.12  -0.20  -0.07
    23   6     0.02   0.00   0.04     0.02   0.01   0.06    -0.01  -0.01  -0.04
    24   1     0.05   0.03   0.22     0.09   0.07   0.29    -0.04  -0.03  -0.08
    25   6     0.00  -0.01  -0.01     0.00  -0.01  -0.01    -0.01   0.01   0.00
    26   1     0.00   0.07   0.12    -0.01   0.10   0.15    -0.01  -0.08  -0.14
    27   1     0.04  -0.03   0.02     0.02  -0.02   0.00     0.03  -0.01   0.02
    28   1    -0.07   0.14   0.11    -0.04   0.13   0.12     0.01  -0.05  -0.06
                    49                     50                     51
                     A                      B                      A
 Frequencies --  1320.0356              1337.2567              1342.1999
 Red. masses --     1.9786                 5.0022                 2.3882
 Frc consts  --     2.0314                 5.2704                 2.5348
 IR Inten    --     0.1713                 0.0502                 0.2119
  Atom  AN      X      Y      Z        X      Y      Z        X      Y      Z
     1   6    -0.03   0.02   0.03     0.12  -0.08  -0.09     0.08  -0.06  -0.06
     2   6     0.03  -0.05   0.03    -0.09   0.13  -0.06    -0.04   0.06  -0.03
     3   6     0.02   0.00  -0.05    -0.04  -0.05   0.15    -0.02  -0.05   0.11
     4   1    -0.06   0.11  -0.06     0.09  -0.16   0.10    -0.02   0.04  -0.02
     5   6     0.02   0.01  -0.06    -0.04  -0.05   0.16    -0.01  -0.03   0.07
     6   1     0.01  -0.01  -0.01    -0.13   0.09   0.10    -0.16   0.12   0.13
     7   6     0.02  -0.04   0.01    -0.08   0.13  -0.07    -0.05   0.10  -0.06
     8   1    -0.03  -0.06   0.17     0.04   0.05  -0.17    -0.01  -0.04   0.08
     9   6    -0.07   0.08   0.05     0.14  -0.08  -0.11     0.04  -0.01  -0.04
    10   1     0.05   0.04  -0.10     0.02   0.03  -0.08     0.08   0.09  -0.29
    11   1     0.08  -0.09   0.05     0.06  -0.10   0.05     0.17  -0.26   0.13
    12   6     0.01  -0.12   0.02    -0.03  -0.01   0.04     0.00  -0.06   0.02
    13   6    -0.01   0.12   0.02    -0.03  -0.01  -0.04     0.00   0.06   0.02
    14   1     0.06   0.22  -0.17     0.04  -0.09   0.09     0.03  -0.04   0.01
    15   1     0.24   0.48  -0.05     0.09   0.31  -0.26     0.16   0.35  -0.08
    16   6     0.07  -0.08   0.05     0.14  -0.08   0.11    -0.04   0.01  -0.04
    17   1    -0.24  -0.48  -0.05     0.09   0.31   0.26    -0.16  -0.35  -0.08
    18   1    -0.06  -0.22  -0.17     0.04  -0.09  -0.09    -0.03   0.04   0.01
    19   6    -0.02   0.04   0.01    -0.08   0.13   0.07     0.05  -0.10  -0.06
    20   6    -0.02   0.00  -0.05    -0.04  -0.05  -0.15     0.02   0.05   0.11
    21   6    -0.02  -0.01  -0.06    -0.04  -0.05  -0.16     0.01   0.03   0.07
    22   1    -0.08   0.09   0.05     0.06  -0.10  -0.05    -0.17   0.26   0.13
    23   6    -0.03   0.05   0.03    -0.09   0.13   0.06     0.04  -0.06  -0.03
    24   1    -0.05  -0.04  -0.10     0.02   0.03   0.08    -0.08  -0.09  -0.29
    25   6     0.03  -0.02   0.03     0.12  -0.08   0.09    -0.08   0.06  -0.06
    26   1     0.03   0.06   0.17     0.04   0.05   0.17     0.01   0.04   0.08
    27   1    -0.01   0.01  -0.01    -0.13   0.09  -0.10     0.16  -0.12   0.13
    28   1     0.06  -0.11  -0.06     0.09  -0.16  -0.10     0.02  -0.04  -0.02
                    52                     53                     54
                     B                      A                      B
 Frequencies --  1350.1800              1359.2034              1364.5130
 Red. masses --     1.3265                 1.2671                 1.4544
 Frc consts  --     1.4247                 1.3792                 1.5954
 IR Inten    --     0.2905                 1.3349                 7.7157
  Atom  AN      X      Y      Z        X      Y      Z        X      Y      Z
     1   6    -0.03   0.02   0.02     0.01  -0.01  -0.01     0.00   0.00   0.00
     2   6    -0.01   0.01   0.01     0.02  -0.03   0.01     0.00   0.02  -0.02
     3   6     0.00   0.02  -0.05     0.00  -0.01   0.02     0.00   0.00   0.01
     4   1     0.11  -0.20   0.12    -0.11   0.19  -0.11     0.03  -0.04   0.01
     5   6    -0.01   0.00   0.02     0.01   0.01  -0.04    -0.01   0.01   0.02
     6   1     0.15  -0.10  -0.11    -0.11   0.08   0.08     0.04  -0.03  -0.04
     7   6     0.02  -0.04   0.03    -0.01   0.01  -0.01     0.01  -0.02   0.01
     8   1     0.05   0.08  -0.22    -0.04  -0.07   0.21     0.02   0.06  -0.13
     9   6     0.04  -0.02  -0.04    -0.05   0.02   0.04     0.01  -0.05   0.01
    10   1    -0.09  -0.11   0.36     0.06   0.08  -0.27    -0.01  -0.01   0.03
    11   1    -0.17   0.27  -0.13     0.12  -0.20   0.10    -0.08   0.12  -0.07
    12   6    -0.02  -0.02   0.03     0.01   0.04  -0.02     0.03   0.09  -0.09
    13   6    -0.02  -0.02  -0.03    -0.01  -0.04  -0.02     0.03   0.09   0.09
    14   1     0.08   0.05   0.01    -0.02   0.11  -0.06    -0.29  -0.49   0.20
    15   1     0.05   0.17  -0.11    -0.17  -0.38   0.12    -0.09  -0.21   0.05
    16   6     0.04  -0.02   0.04     0.05  -0.02   0.04     0.01  -0.05  -0.01
    17   1     0.05   0.17   0.11     0.17   0.38   0.12    -0.09  -0.21  -0.05
    18   1     0.08   0.05  -0.01     0.02  -0.11  -0.06    -0.29  -0.49  -0.20
    19   6     0.02  -0.04  -0.03     0.01  -0.01  -0.01     0.01  -0.02  -0.01
    20   6     0.00   0.02   0.05     0.00   0.01   0.02     0.00   0.00  -0.01
    21   6    -0.01   0.00  -0.02    -0.01  -0.01  -0.04    -0.01   0.01  -0.02
    22   1    -0.17   0.27   0.13    -0.12   0.20   0.10    -0.08   0.12   0.07
    23   6    -0.01   0.01  -0.01    -0.02   0.03   0.01     0.00   0.02   0.02
    24   1    -0.09  -0.11  -0.36    -0.06  -0.08  -0.27    -0.01  -0.01  -0.03
    25   6    -0.03   0.02  -0.02    -0.01   0.01  -0.01     0.00   0.00   0.00
    26   1     0.05   0.08   0.22     0.04   0.07   0.21     0.02   0.06   0.13
    27   1     0.15  -0.10   0.11     0.11  -0.08   0.08     0.04  -0.03   0.04
    28   1     0.11  -0.20  -0.12     0.11  -0.19  -0.11     0.03  -0.04  -0.01
                    55                     56                     57
                     A                      B                      B
 Frequencies --  1476.7825              1476.9956              1483.2484
 Red. masses --     2.0897                 2.1641                 1.1100
 Frc consts  --     2.6852                 2.7816                 1.4388
 IR Inten    --     5.1811                10.1915                 7.7971
  Atom  AN      X      Y      Z        X      Y      Z        X      Y      Z
     1   6    -0.06   0.04   0.05     0.07  -0.04  -0.05     0.01  -0.01   0.00
     2   6    -0.01   0.05  -0.08     0.01  -0.06   0.08     0.00   0.00   0.00
     3   6     0.03  -0.06   0.03    -0.04   0.06  -0.03     0.00   0.00  -0.01
     4   1     0.16  -0.21   0.05    -0.17   0.22  -0.06     0.00  -0.01   0.01
     5   6     0.02  -0.06   0.07    -0.02   0.06  -0.07     0.00   0.01  -0.01
     6   1     0.30  -0.21  -0.22    -0.31   0.21   0.23    -0.02   0.01   0.02
     7   6     0.02   0.02  -0.07    -0.01  -0.03   0.07     0.00   0.00   0.00
     8   1     0.10   0.03  -0.25    -0.10  -0.03   0.24    -0.01  -0.01   0.04
     9   6    -0.08   0.06   0.06     0.08  -0.05  -0.06     0.00  -0.02   0.00
    10   1     0.08  -0.01  -0.15    -0.09   0.01   0.15    -0.01   0.00   0.02
    11   1     0.11  -0.13   0.00    -0.12   0.13   0.00     0.00  -0.01   0.01
    12   6     0.02  -0.01   0.00    -0.01   0.01   0.02    -0.04   0.01  -0.05
    13   6    -0.02   0.01   0.00    -0.01   0.01  -0.02    -0.04   0.01   0.05
    14   1    -0.13   0.13  -0.10    -0.06  -0.08   0.06     0.45  -0.18   0.14
    15   1    -0.04  -0.15  -0.04     0.00   0.06  -0.15     0.06   0.20   0.45
    16   6     0.08  -0.06   0.06     0.08  -0.05   0.06     0.00  -0.02   0.00
    17   1     0.04   0.15  -0.04     0.00   0.06   0.15     0.06   0.20  -0.45
    18   1     0.13  -0.13  -0.10    -0.06  -0.08  -0.06     0.45  -0.18  -0.14
    19   6    -0.02  -0.02  -0.07    -0.01  -0.03  -0.07     0.00   0.00   0.00
    20   6    -0.03   0.06   0.03    -0.04   0.06   0.03     0.00   0.00   0.01
    21   6    -0.02   0.06   0.07    -0.02   0.06   0.07     0.00   0.01   0.01
    22   1    -0.11   0.13   0.00    -0.12   0.13   0.00     0.00  -0.01  -0.01
    23   6     0.01  -0.05  -0.08     0.01  -0.06  -0.08     0.00   0.00   0.00
    24   1    -0.08   0.01  -0.15    -0.09   0.01  -0.15    -0.01   0.00  -0.02
    25   6     0.06  -0.04   0.05     0.07  -0.04   0.05     0.01  -0.01   0.00
    26   1    -0.10  -0.03  -0.25    -0.10  -0.03  -0.24    -0.01  -0.01  -0.04
    27   1    -0.30   0.21  -0.22    -0.31   0.21  -0.23    -0.02   0.01  -0.02
    28   1    -0.16   0.21   0.05    -0.17   0.22   0.06     0.00  -0.01  -0.01
                    58                     59                     60
                     A                      A                      B
 Frequencies --  1487.6945              1519.6954              1521.3043
 Red. masses --     1.1296                 2.2603                 2.2273
 Frc consts  --     1.4730                 3.0755                 3.0372
 IR Inten    --     1.1347                10.0197                12.1570
  Atom  AN      X      Y      Z        X      Y      Z        X      Y      Z
     1   6    -0.01   0.01   0.01    -0.01   0.05  -0.06     0.01  -0.05   0.06
     2   6     0.00   0.00  -0.01     0.06  -0.09   0.02    -0.06   0.09  -0.02
     3   6     0.00  -0.01   0.01    -0.04   0.00   0.07     0.04   0.00  -0.07
     4   1     0.02  -0.02   0.00    -0.15   0.26  -0.16     0.14  -0.26   0.16
     5   6     0.00  -0.01   0.01    -0.04  -0.01   0.10     0.04   0.01  -0.10
     6   1     0.04  -0.03  -0.03    -0.02   0.06  -0.06     0.01  -0.06   0.07
     7   6     0.01   0.00  -0.01     0.06  -0.07   0.00    -0.06   0.06   0.00
     8   1     0.01   0.01  -0.04     0.05   0.13  -0.31    -0.05  -0.13   0.31
     9   6    -0.02   0.00   0.01    -0.01   0.06  -0.08     0.02  -0.07   0.08
    10   1     0.02   0.01  -0.05     0.03   0.13  -0.28    -0.04  -0.13   0.28
    11   1     0.01   0.01  -0.01    -0.12   0.24  -0.17     0.12  -0.23   0.16
    12   6    -0.03   0.01  -0.06     0.01  -0.01   0.02     0.00   0.02  -0.02
    13   6     0.03  -0.01  -0.06    -0.01   0.01   0.02     0.00   0.02   0.02
    14   1     0.46  -0.13   0.10    -0.03  -0.02   0.02    -0.09   0.01  -0.02
    15   1     0.03   0.12   0.48     0.00  -0.02  -0.01    -0.01  -0.02  -0.09
    16   6     0.02   0.00   0.01     0.01  -0.06  -0.08     0.02  -0.07  -0.08
    17   1    -0.03  -0.12   0.48     0.00   0.02  -0.01    -0.01  -0.02   0.09
    18   1    -0.46   0.13   0.10     0.03   0.02   0.02    -0.09   0.01   0.02
    19   6    -0.01   0.00  -0.01    -0.06   0.07   0.00    -0.06   0.06   0.00
    20   6     0.00   0.01   0.01     0.04   0.00   0.07     0.04   0.00   0.07
    21   6     0.00   0.01   0.01     0.04   0.01   0.10     0.04   0.01   0.10
    22   1    -0.01  -0.01  -0.01     0.12  -0.24  -0.17     0.12  -0.23  -0.16
    23   6     0.00   0.00  -0.01    -0.06   0.09   0.02    -0.06   0.09   0.02
    24   1    -0.02  -0.01  -0.05    -0.03  -0.13  -0.28    -0.04  -0.13  -0.28
    25   6     0.01  -0.01   0.01     0.01  -0.05  -0.06     0.01  -0.05  -0.06
    26   1    -0.01  -0.01  -0.04    -0.05  -0.13  -0.31    -0.05  -0.13  -0.31
    27   1    -0.04   0.03  -0.03     0.02  -0.06  -0.06     0.01  -0.06  -0.07
    28   1    -0.02   0.02   0.00     0.15  -0.26  -0.16     0.14  -0.26  -0.16
                    61                     62                     63
                     A                      B                      B
 Frequencies --  1619.5608              1619.9725              1640.5731
 Red. masses --     5.5443                 5.5313                 5.6822
 Frc consts  --     8.5683                 8.5525                 9.0107
 IR Inten    --     0.4622                 1.3163                 7.0302
  Atom  AN      X      Y      Z        X      Y      Z        X      Y      Z
     1   6     0.18  -0.13  -0.13     0.18  -0.12  -0.13     0.01  -0.06   0.07
     2   6    -0.11   0.11   0.04    -0.11   0.10   0.04    -0.06   0.15  -0.12
     3   6     0.08  -0.02  -0.12     0.08  -0.02  -0.12    -0.01  -0.10   0.19
     4   1     0.00  -0.10   0.15     0.00  -0.10   0.15     0.14  -0.18   0.04
     5   6    -0.09   0.04   0.11    -0.09   0.04   0.11     0.01   0.10  -0.18
     6   1    -0.24   0.16   0.18    -0.24   0.16   0.18     0.02  -0.07   0.09
     7   6     0.10  -0.11  -0.02     0.10  -0.11  -0.02     0.07  -0.16   0.13
     8   1    -0.05   0.12  -0.11    -0.05   0.12  -0.11    -0.09  -0.03   0.22
     9   6    -0.15   0.10   0.11    -0.15   0.10   0.12    -0.02   0.10  -0.12
    10   1     0.02  -0.12   0.17     0.02  -0.12   0.17     0.10   0.05  -0.26
    11   1    -0.04   0.14  -0.15    -0.04   0.14  -0.15    -0.16   0.23  -0.07
    12   6     0.01  -0.01  -0.02     0.02  -0.01  -0.01     0.00  -0.02   0.02
    13   6    -0.01   0.01  -0.02     0.02  -0.01   0.01     0.00  -0.02  -0.02
    14   1     0.00   0.09  -0.07     0.00   0.10  -0.07     0.02   0.01   0.00
    15   1    -0.02  -0.08   0.10    -0.01  -0.09   0.09     0.01   0.00   0.01
    16   6     0.15  -0.10   0.11    -0.15   0.10  -0.12    -0.02   0.10   0.12
    17   1     0.02   0.08   0.10    -0.01  -0.09  -0.09     0.01   0.00  -0.01
    18   1     0.00  -0.09  -0.07     0.00   0.10   0.07     0.02   0.01   0.00
    19   6    -0.10   0.11  -0.02     0.10  -0.11   0.02     0.07  -0.16  -0.13
    20   6    -0.08   0.02  -0.12     0.08  -0.02   0.12    -0.01  -0.10  -0.19
    21   6     0.09  -0.04   0.11    -0.09   0.04  -0.11     0.01   0.10   0.18
    22   1     0.04  -0.14  -0.15    -0.04   0.14   0.15    -0.16   0.23   0.07
    23   6     0.11  -0.11   0.04    -0.11   0.10  -0.04    -0.06   0.15   0.12
    24   1    -0.02   0.12   0.17     0.02  -0.12  -0.17     0.10   0.05   0.26
    25   6    -0.18   0.13  -0.13     0.18  -0.12   0.13     0.01  -0.06  -0.07
    26   1     0.05  -0.12  -0.11    -0.05   0.12   0.11    -0.09  -0.03  -0.22
    27   1     0.24  -0.16   0.18    -0.24   0.16  -0.18     0.02  -0.07  -0.09
    28   1     0.00   0.10   0.15     0.00  -0.10  -0.15     0.14  -0.18  -0.04
                    64                     65                     66
                     A                      B                      A
 Frequencies --  1641.3909              3019.0092              3024.6160
 Red. masses --     5.6501                 1.0604                 1.0596
 Frc consts  --     8.9688                 5.6947                 5.7113
 IR Inten    --     1.8585                16.5364                43.1343
  Atom  AN      X      Y      Z        X      Y      Z        X      Y      Z
     1   6     0.01  -0.06   0.08     0.00   0.00   0.00     0.00   0.00   0.00
     2   6    -0.06   0.14  -0.12     0.00   0.00   0.00     0.00   0.00   0.00
     3   6    -0.01  -0.10   0.19     0.00   0.00   0.00     0.00   0.00   0.00
     4   1     0.14  -0.18   0.04     0.00   0.00   0.00     0.00   0.00   0.00
     5   6     0.01   0.10  -0.18     0.00   0.00   0.00     0.00   0.00   0.00
     6   1     0.02  -0.07   0.09     0.00   0.00   0.00     0.00   0.00   0.00
     7   6     0.07  -0.16   0.13     0.00   0.00   0.00     0.00   0.00   0.00
     8   1    -0.09  -0.03   0.22     0.00   0.00   0.00     0.00   0.00   0.00
     9   6    -0.02   0.10  -0.12     0.00   0.00   0.00     0.00   0.00   0.00
    10   1     0.10   0.05  -0.26     0.00   0.00   0.00     0.00   0.00   0.00
    11   1    -0.16   0.23  -0.07     0.00   0.00  -0.01     0.00   0.00  -0.01
    12   6     0.01  -0.01   0.02    -0.02  -0.01  -0.04    -0.04   0.00  -0.03
    13   6    -0.01   0.01   0.02    -0.02  -0.01   0.04     0.04   0.00  -0.03
    14   1    -0.03  -0.02   0.02    -0.08   0.29   0.51    -0.06   0.24   0.40
    15   1     0.00  -0.02  -0.01     0.35  -0.15  -0.02     0.49  -0.20  -0.02
    16   6     0.02  -0.10  -0.12     0.00   0.00   0.00     0.00   0.00   0.00
    17   1     0.00   0.02  -0.01     0.35  -0.15   0.02    -0.49   0.20  -0.02
    18   1     0.03   0.02   0.02    -0.08   0.29  -0.51     0.06  -0.24   0.40
    19   6    -0.07   0.16   0.13     0.00   0.00   0.00     0.00   0.00   0.00
    20   6     0.01   0.10   0.19     0.00   0.00   0.00     0.00   0.00   0.00
    21   6    -0.01  -0.10  -0.18     0.00   0.00   0.00     0.00   0.00   0.00
    22   1     0.16  -0.23  -0.07     0.00   0.00   0.01     0.00   0.00  -0.01
    23   6     0.06  -0.14  -0.12     0.00   0.00   0.00     0.00   0.00   0.00
    24   1    -0.10  -0.05  -0.26     0.00   0.00   0.00     0.00   0.00   0.00
    25   6    -0.01   0.06   0.08     0.00   0.00   0.00     0.00   0.00   0.00
    26   1     0.09   0.03   0.22     0.00   0.00   0.00     0.00   0.00   0.00
    27   1    -0.02   0.07   0.09     0.00   0.00   0.00     0.00   0.00   0.00
    28   1    -0.14   0.18   0.04     0.00   0.00   0.00     0.00   0.00   0.00
                    67                     68                     69
                     A                      B                      A
 Frequencies --  3060.3869              3072.4294              3145.9626
 Red. masses --     1.1034                 1.1030                 1.0869
 Frc consts  --     6.0888                 6.1348                 6.3380
 IR Inten    --    19.8816                31.0092                14.4436
  Atom  AN      X      Y      Z        X      Y      Z        X      Y      Z
     1   6     0.00   0.00   0.00     0.00   0.00   0.00     0.00  -0.01   0.01
     2   6     0.00   0.00   0.00     0.00   0.00   0.00     0.00   0.00   0.00
     3   6     0.00   0.00   0.00     0.00   0.00   0.00     0.00   0.00   0.00
     4   1     0.00   0.00   0.00     0.00   0.00   0.00    -0.03   0.01   0.05
     5   6     0.00   0.00   0.00     0.00   0.00   0.00    -0.02   0.02   0.00
     6   1     0.00   0.00   0.00     0.00   0.00   0.00    -0.02   0.07  -0.08
     7   6     0.00   0.00   0.00     0.00   0.00   0.00     0.03  -0.01  -0.05
     8   1     0.00   0.00   0.00     0.00   0.00   0.00     0.19  -0.21  -0.02
     9   6     0.00   0.00   0.00     0.00   0.00   0.00     0.00   0.00   0.00
    10   1     0.00   0.00   0.00    -0.01   0.01   0.00     0.01  -0.01   0.00
    11   1     0.00   0.00  -0.01    -0.01   0.00   0.01    -0.33   0.07   0.53
    12   6     0.04  -0.04  -0.04    -0.05   0.03   0.03     0.00   0.00   0.00
    13   6    -0.04   0.04  -0.04    -0.05   0.03  -0.03     0.00   0.00   0.00
    14   1    -0.05   0.26   0.46     0.04  -0.19  -0.33     0.00   0.00   0.01
    15   1    -0.43   0.17   0.00     0.55  -0.22  -0.01     0.00   0.00   0.00
    16   6     0.00   0.00   0.00     0.00   0.00   0.00     0.00   0.00   0.00
    17   1     0.43  -0.17   0.00     0.55  -0.22   0.01     0.00   0.00   0.00
    18   1     0.05  -0.26   0.46     0.04  -0.19   0.33     0.00   0.00   0.01
    19   6     0.00   0.00   0.00     0.00   0.00   0.00    -0.03   0.01  -0.05
    20   6     0.00   0.00   0.00     0.00   0.00   0.00     0.00   0.00   0.00
    21   6     0.00   0.00   0.00     0.00   0.00   0.00     0.02  -0.02   0.00
    22   1     0.00   0.00  -0.01    -0.01   0.00  -0.01     0.33  -0.07   0.53
    23   6     0.00   0.00   0.00     0.00   0.00   0.00     0.00   0.00   0.00
    24   1     0.00   0.00   0.00    -0.01   0.01   0.00    -0.01   0.01   0.00
    25   6     0.00   0.00   0.00     0.00   0.00   0.00     0.00   0.01   0.01
    26   1     0.00   0.00   0.00     0.00   0.00   0.00    -0.19   0.21  -0.02
    27   1     0.00   0.00   0.00     0.00   0.00   0.00     0.02  -0.07  -0.08
    28   1     0.00   0.00   0.00     0.00   0.00   0.00     0.03  -0.01   0.05
                    70                     71                     72
                     B                      B                      A
 Frequencies --  3145.9728              3156.3361              3156.3427
 Red. masses --     1.0870                 1.0859                 1.0859
 Frc consts  --     6.3383                 6.3741                 6.3739
 IR Inten    --     2.1787                 3.8709                 0.0001
  Atom  AN      X      Y      Z        X      Y      Z        X      Y      Z
     1   6     0.00  -0.01   0.01     0.00  -0.01   0.02     0.00   0.01  -0.02
     2   6     0.00   0.00   0.00     0.02   0.00  -0.03    -0.02   0.00   0.03
     3   6     0.00   0.00   0.00    -0.03   0.03   0.00     0.03  -0.03   0.00
     4   1    -0.04   0.01   0.06    -0.23   0.05   0.36     0.23  -0.05  -0.36
     5   6    -0.02   0.02   0.00    -0.01   0.01   0.00     0.01  -0.01   0.00
     6   1    -0.02   0.07  -0.08    -0.04   0.18  -0.22     0.04  -0.18   0.21
     7   6     0.03  -0.01  -0.05    -0.01   0.00   0.01     0.01   0.00  -0.01
     8   1     0.19  -0.21  -0.03     0.07  -0.08  -0.01    -0.07   0.08   0.01
     9   6     0.00   0.00   0.00     0.00   0.00   0.00     0.00   0.00   0.00
    10   1     0.01  -0.01   0.00     0.30  -0.32  -0.04    -0.30   0.33   0.04
    11   1    -0.33   0.07   0.53     0.08  -0.02  -0.13    -0.08   0.02   0.13
    12   6     0.00   0.00   0.00     0.00   0.00   0.00     0.00   0.00   0.00
    13   6     0.00   0.00   0.00     0.00   0.00   0.00     0.00   0.00   0.00
    14   1     0.00   0.00   0.01     0.00   0.00   0.00     0.00   0.00   0.00
    15   1    -0.01   0.00   0.00     0.01   0.00   0.00     0.00   0.00   0.00
    16   6     0.00   0.00   0.00     0.00   0.00   0.00     0.00   0.00   0.00
    17   1    -0.01   0.00   0.00     0.01   0.00   0.00     0.00   0.00   0.00
    18   1     0.00   0.00  -0.01     0.00   0.00   0.00     0.00   0.00   0.00
    19   6     0.03  -0.01   0.05    -0.01   0.00  -0.01    -0.01   0.00  -0.01
    20   6     0.00   0.00   0.00    -0.03   0.03   0.00    -0.03   0.03   0.00
    21   6    -0.02   0.02   0.00    -0.01   0.01   0.00    -0.01   0.01   0.00
    22   1    -0.33   0.07  -0.53     0.08  -0.02   0.13     0.08  -0.02   0.13
    23   6     0.00   0.00   0.00     0.02   0.00   0.03     0.02   0.00   0.03
    24   1     0.01  -0.01   0.00     0.30  -0.32   0.04     0.30  -0.33   0.04
    25   6     0.00  -0.01  -0.01     0.00  -0.01  -0.02     0.00  -0.01  -0.02
    26   1     0.19  -0.21   0.03     0.07  -0.08   0.01     0.07  -0.08   0.01
    27   1    -0.02   0.07   0.08    -0.04   0.18   0.22    -0.04   0.18   0.21
    28   1    -0.04   0.01  -0.06    -0.23   0.05  -0.36    -0.23   0.05  -0.36
                    73                     74                     75
                     A                      B                      B
 Frequencies --  3165.4094              3165.5920              3174.2397
 Red. masses --     1.0901                 1.0902                 1.0942
 Frc consts  --     6.4354                 6.4367                 6.4958
 IR Inten    --    14.7284                 2.7435                58.1917
  Atom  AN      X      Y      Z        X      Y      Z        X      Y      Z
     1   6     0.01  -0.02   0.03    -0.01   0.02  -0.03     0.00  -0.01   0.01
     2   6     0.00   0.00   0.00     0.00   0.00   0.00     0.02   0.00  -0.03
     3   6     0.02  -0.03   0.00    -0.02   0.03   0.00     0.02  -0.02   0.00
     4   1     0.01   0.00  -0.01    -0.01   0.00   0.02    -0.22   0.04   0.34
     5   6    -0.02   0.02   0.00     0.02  -0.02   0.00     0.03  -0.03   0.00
     6   1    -0.06   0.26  -0.31     0.06  -0.25   0.31    -0.02   0.09  -0.11
     7   6    -0.01   0.00   0.02     0.01   0.00  -0.02     0.01   0.00  -0.01
     8   1     0.24  -0.26  -0.03    -0.24   0.26   0.03    -0.29   0.31   0.03
     9   6     0.00   0.00   0.00     0.00   0.00   0.00     0.00   0.00   0.00
    10   1    -0.27   0.29   0.03     0.27  -0.29  -0.03    -0.22   0.24   0.02
    11   1     0.11  -0.02  -0.18    -0.11   0.02   0.18    -0.07   0.01   0.11
    12   6     0.00   0.00   0.00     0.00   0.00   0.00     0.00   0.00   0.00
    13   6     0.00   0.00   0.00     0.00   0.00   0.00     0.00   0.00   0.00
    14   1     0.00   0.00   0.00     0.00   0.00   0.00     0.00   0.00   0.00
    15   1    -0.01   0.00   0.00     0.01   0.00   0.00    -0.01   0.00   0.00
    16   6     0.00   0.00   0.00     0.00   0.00   0.00     0.00   0.00   0.00
    17   1     0.01   0.00   0.00     0.01   0.00   0.00    -0.01   0.00   0.00
    18   1     0.00   0.00   0.00     0.00   0.00   0.00     0.00   0.00   0.00
    19   6     0.01   0.00   0.02     0.01   0.00   0.02     0.01   0.00   0.01
    20   6    -0.02   0.03   0.00    -0.02   0.03   0.00     0.02  -0.02   0.00
    21   6     0.02  -0.02   0.00     0.02  -0.02   0.00     0.03  -0.03   0.00
    22   1    -0.11   0.02  -0.18    -0.11   0.02  -0.18    -0.07   0.01  -0.11
    23   6     0.00   0.00   0.00     0.00   0.00   0.00     0.02   0.00   0.03
    24   1     0.27  -0.29   0.03     0.27  -0.29   0.03    -0.22   0.24  -0.02
    25   6    -0.01   0.02   0.03    -0.01   0.02   0.03     0.00  -0.01  -0.01
    26   1    -0.24   0.26  -0.03    -0.24   0.26  -0.03    -0.29   0.31  -0.03
    27   1     0.06  -0.26  -0.31     0.06  -0.25  -0.31    -0.02   0.09   0.11
    28   1    -0.01   0.00  -0.01    -0.01   0.00  -0.02    -0.22   0.04  -0.34
                    76                     77                     78
                     A                      B                      A
 Frequencies --  3174.2400              3185.8576              3185.9855
 Red. masses --     1.0941                 1.0984                 1.0984
 Frc consts  --     6.4953                 6.5685                 6.5687
 IR Inten    --     7.4715                14.2841                17.0303
  Atom  AN      X      Y      Z        X      Y      Z        X      Y      Z
     1   6     0.00  -0.01   0.01    -0.01   0.03  -0.03     0.01  -0.03   0.03
     2   6     0.02   0.00  -0.03     0.02   0.00  -0.03    -0.02   0.00   0.03
     3   6     0.02  -0.02   0.00     0.01  -0.01   0.00    -0.01   0.01   0.00
     4   1    -0.22   0.04   0.34    -0.20   0.04   0.31     0.20  -0.04  -0.32
     5   6     0.03  -0.03   0.00    -0.02   0.02   0.00     0.02  -0.02   0.00
     6   1    -0.02   0.08  -0.11     0.07  -0.29   0.36    -0.07   0.30  -0.36
     7   6     0.01   0.00  -0.01     0.00   0.00   0.01     0.00   0.00  -0.01
     8   1    -0.29   0.31   0.03     0.21  -0.22  -0.03    -0.21   0.22   0.03
     9   6     0.00   0.00   0.00     0.00   0.00   0.00     0.00   0.00   0.00
    10   1    -0.22   0.24   0.02    -0.12   0.13   0.01     0.11  -0.12  -0.01
    11   1    -0.07   0.01   0.12     0.05  -0.01  -0.08    -0.05   0.01   0.08
    12   6     0.00   0.00   0.00     0.00   0.00   0.00     0.00   0.00   0.00
    13   6     0.00   0.00   0.00     0.00   0.00   0.00     0.00   0.00   0.00
    14   1     0.00   0.00   0.00     0.00   0.00   0.00     0.00   0.00   0.00
    15   1     0.00   0.00   0.00     0.00   0.00   0.00     0.00   0.00   0.00
    16   6     0.00   0.00   0.00     0.00   0.00   0.00     0.00   0.00   0.00
    17   1     0.00   0.00   0.00     0.00   0.00   0.00     0.00   0.00   0.00
    18   1     0.00   0.00   0.00     0.00   0.00   0.00     0.00   0.00   0.00
    19   6    -0.01   0.00  -0.01     0.00   0.00  -0.01     0.00   0.00  -0.01
    20   6    -0.02   0.02   0.00     0.01  -0.01   0.00     0.01  -0.01   0.00
    21   6    -0.03   0.03   0.00    -0.02   0.02   0.00    -0.02   0.02   0.00
    22   1     0.07  -0.01   0.12     0.05  -0.01   0.08     0.05  -0.01   0.08
    23   6    -0.02   0.00  -0.03     0.02   0.00   0.03     0.02   0.00   0.03
    24   1     0.22  -0.24   0.02    -0.12   0.13  -0.01    -0.11   0.12  -0.01
    25   6     0.00   0.01   0.01    -0.01   0.03   0.03    -0.01   0.03   0.03
    26   1     0.29  -0.31   0.03     0.21  -0.22   0.03     0.21  -0.22   0.03
    27   1     0.02  -0.08  -0.11     0.07  -0.29  -0.36     0.07  -0.30  -0.36
    28   1     0.22  -0.04   0.34    -0.20   0.04  -0.31    -0.20   0.04  -0.32
    
    
    Vibrational Energies and Rotational Constants (cm-1)
 Mode(Quanta)     E(harm)     E(anharm)    Aa(z)       Ba(x)       Ca(y)
 Equilibrium Geometry                     0.044472    0.014626    0.012684
 Ground State   51977.556    51491.238    0.044035    0.014417    0.012585
 Fundamental Bands (DE w.r.t. Ground State)
  1(1)           3185.986     3057.487    0.044026    0.014416    0.012584
  2(1)           3174.240     3069.052    0.044026    0.014413    0.012583
  3(1)           3165.409     3042.046    0.044007    0.014418    0.012588
  4(1)           3156.343     3031.342    0.044009    0.014416    0.012587
  5(1)           3145.963     3009.790    0.044008    0.014419    0.012588
  6(1)           3060.387     2920.098    0.043987    0.014421    0.012592
  7(1)           3024.616     2895.577    0.044033    0.014412    0.012582
  8(1)           1641.391     1600.605    0.044050    0.014415    0.012586
  9(1)           1619.561     1581.236    0.043948    0.014411    0.012575
 10(1)           1519.695     1488.786    0.044027    0.014416    0.012585
 11(1)           1487.695     1482.084    0.044032    0.014417    0.012585
 12(1)           1476.782     1447.951    0.044010    0.014415    0.012581
 13(1)           1359.203     1338.562    0.044023    0.014426    0.012588
 14(1)           1342.200     1309.228    0.044005    0.014414    0.012581
 15(1)           1320.036     1293.759    0.043939    0.014435    0.012598
 16(1)           1235.342     1211.191    0.043945    0.014448    0.012604
 17(1)           1207.767     1183.646    0.044040    0.014415    0.012578
 18(1)           1198.155     1184.282    0.044032    0.014418    0.012586
 19(1)           1175.565     1159.220    0.044035    0.014418    0.012585
 20(1)           1103.911     1086.558    0.044033    0.014416    0.012584
 21(1)           1047.120     1030.732    0.044003    0.014417    0.012583
 22(1)           1011.720      998.191    0.044024    0.014417    0.012584
 23(1)           1008.570      991.838    0.043891    0.014449    0.012612
 24(1)            993.628      979.208    0.044021    0.014415    0.012584
 25(1)            972.850      973.165    0.044024    0.014404    0.012580
 26(1)            942.182      926.845    0.044150    0.014368    0.012544
 27(1)            915.907      912.278    0.044027    0.014403    0.012580
 28(1)            853.751      852.698    0.044032    0.014400    0.012578
 29(1)            774.434      762.034    0.044023    0.014416    0.012583
 30(1)            751.275      738.632    0.044019    0.014399    0.012575
 31(1)            712.577      711.784    0.044038    0.014405    0.012580
 32(1)            631.043      626.768    0.044030    0.014417    0.012586
 33(1)            543.042      540.227    0.044026    0.014414    0.012582
 34(1)            483.310      476.883    0.044039    0.014390    0.012571
 35(1)            412.420      416.886    0.044043    0.014400    0.012579
 36(1)            366.813      370.378    0.044032    0.014411    0.012578
 37(1)            227.542      232.392    0.044047    0.014370    0.012568
 38(1)            118.685      117.450    0.044057    0.014410    0.012582
 39(1)             47.381      104.530    0.044097    0.014284    0.012530
 40(1)             29.145       37.693    0.044082    0.014423    0.012595
 41(1)           3185.858     3057.062    0.044026    0.014416    0.012584
 42(1)           3174.240     3069.314    0.044026    0.014413    0.012583
 43(1)           3165.592     3042.189    0.044008    0.014417    0.012588
 44(1)           3156.336     3031.303    0.044027    0.014411    0.012582
 45(1)           3145.973     3009.936    0.044009    0.014419    0.012588
 46(1)           3072.429     2932.766    0.044035    0.014410    0.012581
 47(1)           3019.009     2868.330    0.044007    0.014414    0.012587
 48(1)           1640.573     1599.978    0.044051    0.014415    0.012586
 49(1)           1619.972     1582.486    0.043949    0.014411    0.012575
 50(1)           1521.304     1490.967    0.044027    0.014416    0.012585
 51(1)           1483.248     1473.107    0.043990    0.014430    0.012596
 52(1)           1476.996     1448.735    0.044008    0.014415    0.012581
 53(1)           1364.513     1340.467    0.044008    0.014419    0.012587
 54(1)           1350.180     1332.611    0.044029    0.014417    0.012585
 55(1)           1337.257     1304.242    0.043997    0.014412    0.012580
 56(1)           1214.686     1193.174    0.043991    0.014413    0.012579
 57(1)           1197.877     1183.947    0.044033    0.014417    0.012585
 58(1)           1176.239     1160.350    0.044035    0.014418    0.012585
 59(1)           1162.225     1145.947    0.044021    0.014420    0.012588
 60(1)           1089.135     1072.755    0.044042    0.014418    0.012586
 61(1)           1045.898     1029.082    0.044019    0.014416    0.012584
 62(1)           1011.680      998.646    0.044023    0.014417    0.012584
 63(1)            994.224      981.001    0.044022    0.014415    0.012584
 64(1)            973.129      976.666    0.044024    0.014400    0.012579
 65(1)            949.271      941.148    0.044013    0.014423    0.012583
 66(1)            900.684      899.615    0.043910    0.014434    0.012605
 67(1)            852.697      856.992    0.044031    0.014397    0.012577
 68(1)            778.614      768.048    0.044019    0.014412    0.012579
 69(1)            765.144      752.268    0.043951    0.014429    0.012604
 70(1)            711.443      712.177    0.044037    0.014400    0.012578
 71(1)            631.465      626.361    0.044027    0.014418    0.012585
 72(1)            586.666      586.269    0.044030    0.014402    0.012579
 73(1)            510.887      506.607    0.044034    0.014416    0.012583
 74(1)            411.365      411.989    0.044039    0.014417    0.012586
 75(1)            361.859      360.019    0.044040    0.014394    0.012573
 76(1)            322.597      326.998    0.044228    0.014382    0.012539
 77(1)            122.200      116.569    0.044061    0.014420    0.012588
 78(1)             28.006      108.331    0.044064    0.014419    0.012587
