# Supplementary material for: Low-energy vibrational spectra of flexible diphenyl molecules: biphenyl, diphenylmethane, bibenzyl and 2-, 3- and 4-phenyltoluene
Source: Royal Society of Chemistry journal article supplement (doi:10.1039/c4cp03278k), 2014-01-01
Supplement: c4cp03278k6.log [file c4cp03278k6.log]

 Harmonic frequencies (cm**-1), IR intensities (KM/Mole), Raman scattering
 activities (A**4/AMU), depolarization ratios for plane and unpolarized
 incident light, reduced masses (AMU), force constants (mDyne/A),
 and normal coordinates:
                     1                      2                      3
                     A                     B3                     B2
 Frequencies --    67.1715                93.8785               124.5346
 Red. masses --     3.6982                 4.3548                 4.0418
 Frc consts  --     0.0098                 0.0226                 0.0369
 IR Inten    --     0.0000                 0.9240                 0.1105
  Atom  AN      X      Y      Z        X      Y      Z        X      Y      Z
     1   6     0.00   0.00   0.00    -0.21  -0.01   0.00    -0.03  -0.16   0.00
     2   6     0.16   0.06  -0.01    -0.12  -0.01  -0.04    -0.04  -0.09   0.11
     3   6     0.17   0.06  -0.01     0.10   0.02  -0.04     0.01   0.08   0.11
     4   6     0.00   0.00  -0.01     0.23   0.04   0.00     0.06   0.17   0.00
     5   6    -0.17  -0.06  -0.01     0.10   0.02   0.04     0.01   0.08  -0.11
     6   6    -0.16  -0.06  -0.01    -0.12  -0.01   0.04    -0.04  -0.09  -0.11
     7   6     0.00   0.00   0.00    -0.21   0.01   0.00     0.03  -0.16   0.00
     8   6    -0.16   0.06   0.01    -0.12   0.01  -0.04     0.04  -0.09  -0.11
     9   6    -0.17   0.06   0.01     0.10  -0.02  -0.04    -0.01   0.08  -0.11
    10   6     0.00   0.00   0.01     0.23  -0.04   0.00    -0.06   0.17   0.00
    11   6     0.17  -0.06   0.01     0.10  -0.02   0.04    -0.01   0.08   0.11
    12   6     0.16  -0.06   0.01    -0.12   0.01   0.04     0.04  -0.09   0.11
    13   1     0.27   0.11  -0.02    -0.19  -0.01  -0.08    -0.06  -0.16   0.20
    14   1     0.30   0.11   0.00     0.18   0.03  -0.08     0.03   0.14   0.20
    15   1     0.00   0.00  -0.01     0.42   0.07   0.00     0.12   0.29   0.00
    16   1    -0.30  -0.11   0.00     0.18   0.03   0.08     0.03   0.14  -0.20
    17   1    -0.27  -0.11  -0.02    -0.19  -0.01   0.08    -0.06  -0.16  -0.20
    18   1    -0.27   0.11   0.02    -0.19   0.01  -0.08     0.06  -0.16  -0.20
    19   1    -0.30   0.11   0.00     0.18  -0.03  -0.08    -0.03   0.14  -0.20
    20   1     0.00   0.00   0.01     0.42  -0.07   0.00    -0.12   0.29   0.00
    21   1     0.30  -0.11   0.00     0.18  -0.03   0.08    -0.03   0.14   0.20
    22   1     0.27  -0.11   0.02    -0.19   0.01   0.08     0.06  -0.16   0.20
                     4                      5                      6
                    B2                      A                     B3
 Frequencies --   266.7483               311.1571               365.9436
 Red. masses --     4.1193                 6.3180                 3.8632
 Frc consts  --     0.1727                 0.3604                 0.3048
 IR Inten    --     0.0257                 0.0000                 0.3768
  Atom  AN      X      Y      Z        X      Y      Z        X      Y      Z
     1   6     0.12  -0.05   0.00     0.00   0.00   0.06    -0.12   0.11   0.00
     2   6     0.20   0.01   0.04    -0.01   0.04   0.19     0.05   0.16  -0.07
     3   6     0.03   0.02   0.05     0.01   0.04   0.21     0.05   0.04  -0.08
     4   6    -0.17  -0.01   0.00     0.00   0.00   0.27    -0.11  -0.08   0.00
     5   6     0.03   0.02  -0.05    -0.01  -0.04   0.21     0.05   0.04   0.08
     6   6     0.20   0.01  -0.04     0.01  -0.04   0.19     0.05   0.16   0.07
     7   6    -0.12  -0.05   0.00     0.00   0.00  -0.06    -0.12  -0.11   0.00
     8   6    -0.20   0.01  -0.04     0.01   0.04  -0.19     0.05  -0.16  -0.07
     9   6    -0.03   0.02  -0.05    -0.01   0.04  -0.21     0.05  -0.04  -0.08
    10   6     0.17  -0.01   0.00     0.00   0.00  -0.27    -0.11   0.08   0.00
    11   6    -0.03   0.02   0.05     0.01  -0.04  -0.21     0.05  -0.04   0.08
    12   6    -0.20   0.01   0.04    -0.01  -0.04  -0.19     0.05  -0.16   0.07
    13   1     0.27   0.01   0.09    -0.02  -0.01   0.25     0.13   0.24  -0.15
    14   1    -0.01   0.04   0.10     0.03   0.02   0.17     0.12   0.02  -0.16
    15   1    -0.41  -0.05   0.00     0.00   0.00   0.27    -0.23  -0.21   0.00
    16   1    -0.01   0.04  -0.10    -0.03  -0.02   0.17     0.12   0.02   0.16
    17   1     0.27   0.01  -0.09     0.02   0.01   0.25     0.13   0.24   0.15
    18   1    -0.27   0.01  -0.09     0.02  -0.01  -0.25     0.13  -0.24  -0.15
    19   1     0.01   0.04  -0.10    -0.03   0.02  -0.17     0.12  -0.02  -0.16
    20   1     0.41  -0.05   0.00     0.00   0.00  -0.27    -0.23   0.21   0.00
    21   1     0.01   0.04   0.10     0.03  -0.02  -0.17     0.12  -0.02   0.16
    22   1    -0.27   0.01   0.09    -0.02   0.01  -0.25     0.13  -0.24   0.15
                     7                      8                      9
                    B1                      A                     B3
 Frequencies --   410.4893               417.1703               498.9336
 Red. masses --     2.9422                 2.9748                 3.6308
 Frc consts  --     0.2921                 0.3050                 0.5325
 IR Inten    --     0.3911                 0.0000                 8.1166
  Atom  AN      X      Y      Z        X      Y      Z        X      Y      Z
     1   6     0.00   0.00   0.00     0.00   0.00   0.00     0.17   0.15   0.00
     2   6     0.14   0.05   0.00    -0.15  -0.05  -0.01    -0.04   0.10  -0.03
     3   6    -0.14  -0.05   0.00     0.13   0.05  -0.01    -0.09  -0.02  -0.05
     4   6     0.00   0.00   0.00     0.00   0.00  -0.01     0.14   0.02   0.00
     5   6     0.14   0.05   0.00    -0.13  -0.05  -0.01    -0.09  -0.02   0.05
     6   6    -0.14  -0.05   0.00     0.15   0.05  -0.01    -0.04   0.10   0.03
     7   6     0.00   0.00   0.00     0.00   0.00   0.00     0.17  -0.15   0.00
     8   6     0.14  -0.05   0.00     0.15  -0.05   0.01    -0.04  -0.10  -0.03
     9   6    -0.14   0.05   0.00    -0.13   0.05   0.01    -0.09   0.02  -0.05
    10   6     0.00   0.00   0.00     0.00   0.00   0.01     0.14  -0.02   0.00
    11   6     0.14  -0.05   0.00     0.13  -0.05   0.01    -0.09   0.02   0.05
    12   6    -0.14   0.05   0.00    -0.15   0.05   0.01    -0.04  -0.10   0.03
    13   1     0.30   0.11   0.00    -0.30  -0.12   0.00    -0.21   0.06  -0.09
    14   1    -0.30  -0.11   0.00     0.29   0.11  -0.01    -0.27  -0.13  -0.11
    15   1     0.00   0.00   0.00     0.00   0.00  -0.01     0.23   0.00   0.00
    16   1     0.30   0.11   0.00    -0.29  -0.11  -0.01    -0.27  -0.13   0.11
    17   1    -0.30  -0.11   0.00     0.30   0.12   0.00    -0.21   0.06   0.09
    18   1     0.30  -0.11   0.00     0.30  -0.12   0.00    -0.21  -0.06  -0.09
    19   1    -0.30   0.11   0.00    -0.29   0.11   0.01    -0.27   0.13  -0.11
    20   1     0.00   0.00   0.00     0.00   0.00   0.01     0.23   0.00   0.00
    21   1     0.30  -0.11   0.00     0.29  -0.11   0.01    -0.27   0.13   0.11
    22   1    -0.30   0.11   0.00    -0.30   0.12   0.00    -0.21  -0.06   0.09
                    10                     11                     12
                    B2                     B1                     B3
 Frequencies --   554.6589               619.7031               623.3477
 Red. masses --     2.9510                 6.8784                 6.4526
 Frc consts  --     0.5349                 1.5563                 1.4772
 IR Inten    --     3.1621                 7.7887                 0.0009
  Atom  AN      X      Y      Z        X      Y      Z        X      Y      Z
     1   6     0.20   0.05   0.00     0.00   0.00   0.27    -0.05   0.08   0.00
     2   6     0.05  -0.01   0.00     0.06  -0.16   0.02    -0.06   0.13   0.17
     3   6    -0.10  -0.03   0.00     0.06  -0.16  -0.01     0.07  -0.16   0.18
     4   6     0.13   0.06   0.00     0.00   0.00  -0.27     0.02  -0.10   0.00
     5   6    -0.10  -0.03   0.00    -0.06   0.16  -0.01     0.07  -0.16  -0.18
     6   6     0.05  -0.01   0.00    -0.06   0.16   0.02    -0.06   0.13  -0.17
     7   6    -0.20   0.05   0.00     0.00   0.00   0.27    -0.05  -0.08   0.00
     8   6    -0.05  -0.01   0.00     0.06   0.16   0.02    -0.06  -0.13   0.17
     9   6     0.10  -0.03   0.00     0.06   0.16  -0.01     0.07   0.16   0.18
    10   6    -0.13   0.06   0.00     0.00   0.00  -0.27     0.02   0.10   0.00
    11   6     0.10  -0.03   0.00    -0.06  -0.16  -0.01     0.07   0.16  -0.18
    12   6    -0.05  -0.01   0.00    -0.06  -0.16   0.02    -0.06  -0.13  -0.17
    13   1    -0.17  -0.11   0.02     0.01  -0.06  -0.18    -0.06   0.18   0.07
    14   1    -0.37  -0.12   0.02     0.01  -0.04   0.20     0.11  -0.21   0.08
    15   1     0.14   0.06   0.00     0.00   0.00  -0.27    -0.09   0.19   0.00
    16   1    -0.37  -0.12  -0.02    -0.01   0.04   0.20     0.11  -0.21  -0.08
    17   1    -0.17  -0.11  -0.02    -0.01   0.06  -0.18    -0.06   0.18  -0.07
    18   1     0.17  -0.11  -0.02     0.01   0.06  -0.18    -0.06  -0.18   0.07
    19   1     0.37  -0.12  -0.02     0.01   0.04   0.20     0.11   0.21   0.08
    20   1    -0.14   0.06   0.00     0.00   0.00  -0.27    -0.09  -0.19   0.00
    21   1     0.37  -0.12   0.02    -0.01  -0.04   0.20     0.11   0.21  -0.08
    22   1     0.17  -0.11   0.02    -0.01  -0.06  -0.18    -0.06  -0.18  -0.07
                    13                     14                     15
                    B2                     B2                     B3
 Frequencies --   635.3257               709.8817               712.5422
 Red. masses --     6.2507                 1.6901                 1.9327
 Frc consts  --     1.4865                 0.5018                 0.5781
 IR Inten    --     0.0260                10.4912                58.2751
  Atom  AN      X      Y      Z        X      Y      Z        X      Y      Z
     1   6     0.03  -0.09   0.00    -0.07  -0.03   0.00     0.08   0.03   0.00
     2   6     0.03  -0.15  -0.16     0.05   0.01   0.00    -0.06  -0.02   0.00
     3   6    -0.04   0.16  -0.18    -0.09  -0.03   0.00     0.10   0.04   0.00
     4   6    -0.06   0.08   0.00     0.04   0.02   0.00    -0.06  -0.02   0.00
     5   6    -0.04   0.16   0.18    -0.09  -0.03   0.00     0.10   0.04   0.00
     6   6     0.03  -0.15   0.16     0.05   0.01   0.00    -0.06  -0.02   0.00
     7   6    -0.03  -0.09   0.00     0.07  -0.03   0.00     0.08  -0.03   0.00
     8   6    -0.03  -0.15   0.16    -0.05   0.01   0.00    -0.06   0.02   0.00
     9   6     0.04   0.16   0.18     0.09  -0.03   0.00     0.10  -0.04   0.00
    10   6     0.06   0.08   0.00    -0.04   0.02   0.00    -0.06   0.02   0.00
    11   6     0.04   0.16  -0.18     0.09  -0.03   0.00     0.10  -0.04   0.00
    12   6    -0.03  -0.15  -0.16    -0.05   0.01   0.00    -0.06   0.02   0.00
    13   1     0.07  -0.20  -0.06     0.33   0.13  -0.01    -0.34  -0.12  -0.01
    14   1     0.00   0.24  -0.07     0.13   0.06   0.00    -0.10  -0.04  -0.01
    15   1     0.06  -0.20   0.00     0.39   0.14   0.00    -0.39  -0.15   0.00
    16   1     0.00   0.24   0.07     0.13   0.06   0.00    -0.10  -0.04   0.01
    17   1     0.07  -0.20   0.06     0.33   0.13   0.01    -0.34  -0.12   0.01
    18   1    -0.07  -0.20   0.06    -0.33   0.13   0.01    -0.34   0.12  -0.01
    19   1     0.00   0.24   0.07    -0.13   0.06   0.00    -0.10   0.04  -0.01
    20   1    -0.06  -0.20   0.00    -0.39   0.14   0.00    -0.39   0.15   0.00
    21   1     0.00   0.24  -0.07    -0.13   0.06   0.00    -0.10   0.04   0.01
    22   1    -0.07  -0.20  -0.06    -0.33   0.13  -0.01    -0.34   0.12   0.01
                    16                     17                     18
                     A                     B3                     B2
 Frequencies --   751.1773               751.7498               792.8096
 Red. masses --     5.6315                 1.7158                 2.0109
 Frc consts  --     1.8722                 0.5713                 0.7447
 IR Inten    --     0.0000                81.8240                 6.9582
  Atom  AN      X      Y      Z        X      Y      Z        X      Y      Z
     1   6     0.00   0.00  -0.12    -0.11  -0.04   0.00    -0.16  -0.06   0.00
     2   6    -0.06   0.16  -0.07     0.07   0.01   0.00     0.05   0.02  -0.01
     3   6    -0.07   0.18  -0.09    -0.01  -0.01   0.01     0.00   0.01  -0.01
     4   6     0.00   0.00   0.19     0.08   0.03   0.00     0.09   0.03   0.00
     5   6     0.07  -0.18  -0.09    -0.01  -0.01  -0.01     0.00   0.01   0.01
     6   6     0.06  -0.16  -0.07     0.07   0.01   0.00     0.05   0.02   0.01
     7   6     0.00   0.00   0.12    -0.11   0.04   0.00     0.16  -0.06   0.00
     8   6     0.06   0.16   0.07     0.07  -0.01   0.00    -0.05   0.02   0.01
     9   6     0.07   0.18   0.09    -0.01   0.01   0.01     0.00   0.01   0.01
    10   6     0.00   0.00  -0.19     0.08  -0.03   0.00    -0.09   0.03   0.00
    11   6    -0.07  -0.18   0.09    -0.01   0.01  -0.01     0.00   0.01  -0.01
    12   6    -0.06  -0.16   0.07     0.07  -0.01   0.00    -0.05   0.02  -0.01
    13   1    -0.02   0.11   0.05    -0.09  -0.06   0.01     0.02   0.02  -0.01
    14   1    -0.02   0.06  -0.33    -0.38  -0.14   0.02    -0.35  -0.13  -0.02
    15   1     0.00   0.00   0.18    -0.33  -0.10   0.00    -0.38  -0.17   0.00
    16   1     0.02  -0.06  -0.33    -0.38  -0.14  -0.02    -0.35  -0.13   0.02
    17   1     0.02  -0.11   0.05    -0.09  -0.06  -0.01     0.02   0.02   0.01
    18   1     0.02   0.11  -0.05    -0.09   0.06   0.01    -0.02   0.02   0.01
    19   1     0.02   0.06   0.33    -0.38   0.14   0.02     0.35  -0.13   0.02
    20   1     0.00   0.00  -0.18    -0.33   0.10   0.00     0.38  -0.17   0.00
    21   1    -0.02  -0.06   0.33    -0.38   0.14  -0.02     0.35  -0.13  -0.02
    22   1    -0.02  -0.11  -0.05    -0.09   0.06  -0.01    -0.02   0.02  -0.01
                    19                     20                     21
                    B1                      A                     B3
 Frequencies --   853.9969               854.8313               918.1148
 Red. masses --     1.2489                 1.2434                 1.3553
 Frc consts  --     0.5366                 0.5353                 0.6731
 IR Inten    --     0.4528                 0.0000                 2.8762
  Atom  AN      X      Y      Z        X      Y      Z        X      Y      Z
     1   6     0.00   0.00   0.00     0.00   0.00   0.00    -0.03  -0.01   0.00
     2   6     0.05   0.02   0.00    -0.05  -0.02   0.00     0.07   0.02   0.00
     3   6     0.05   0.02   0.00    -0.05  -0.02   0.00     0.00   0.00   0.00
     4   6     0.00   0.00   0.00     0.00   0.00   0.01    -0.07  -0.02   0.00
     5   6    -0.05  -0.02   0.00     0.05   0.02   0.00     0.00   0.00   0.00
     6   6    -0.05  -0.02   0.00     0.05   0.02   0.00     0.07   0.02   0.00
     7   6     0.00   0.00   0.00     0.00   0.00   0.00    -0.03   0.01   0.00
     8   6     0.05  -0.02   0.00     0.05  -0.02   0.00     0.07  -0.02   0.00
     9   6     0.05  -0.02   0.00     0.05  -0.02   0.00     0.00   0.00   0.00
    10   6     0.00   0.00   0.00     0.00   0.00  -0.01    -0.07   0.02   0.00
    11   6    -0.05   0.02   0.00    -0.05   0.02   0.00     0.00   0.00   0.00
    12   6    -0.05   0.02   0.00    -0.05   0.02   0.00     0.07  -0.02   0.00
    13   1    -0.34  -0.13  -0.01     0.33   0.13  -0.01    -0.36  -0.15  -0.01
    14   1    -0.32  -0.12   0.00     0.32   0.12   0.00     0.04   0.02   0.01
    15   1     0.00   0.00   0.00     0.00   0.00   0.01     0.39   0.15   0.00
    16   1     0.32   0.12   0.00    -0.32  -0.12   0.00     0.04   0.02  -0.01
    17   1     0.34   0.13  -0.01    -0.33  -0.13  -0.01    -0.36  -0.15   0.01
    18   1    -0.34   0.13  -0.01    -0.33   0.13   0.01    -0.36   0.15  -0.01
    19   1    -0.32   0.12   0.00    -0.32   0.12   0.00     0.04  -0.02   0.01
    20   1     0.00   0.00   0.00     0.00   0.00  -0.01     0.39  -0.15   0.00
    21   1     0.32  -0.12   0.00     0.32  -0.12   0.00     0.04  -0.02  -0.01
    22   1     0.34  -0.13  -0.01     0.33  -0.13   0.01    -0.36   0.15   0.01
                    22                     23                     24
                    B2                     B1                      A
 Frequencies --   935.7645               975.8289               977.5666
 Red. masses --     1.4877                 1.3594                 1.3768
 Frc consts  --     0.7675                 0.7627                 0.7752
 IR Inten    --     1.2454                 0.6973                 0.0000
  Atom  AN      X      Y      Z        X      Y      Z        X      Y      Z
     1   6     0.07   0.03   0.00     0.00   0.00   0.00     0.00   0.00   0.00
     2   6    -0.07  -0.03   0.00    -0.06  -0.02   0.00     0.05   0.04   0.01
     3   6     0.00   0.00   0.01     0.06   0.02   0.00    -0.06  -0.02   0.00
     4   6     0.06   0.03   0.00     0.00   0.00   0.00     0.00   0.00  -0.02
     5   6     0.00   0.00  -0.01    -0.06  -0.02   0.00     0.06   0.02   0.00
     6   6    -0.07  -0.03   0.00     0.06   0.02   0.00    -0.05  -0.04   0.01
     7   6    -0.07   0.03   0.00     0.00   0.00   0.00     0.00   0.00   0.00
     8   6     0.07  -0.03   0.00    -0.06   0.02   0.00    -0.05   0.04  -0.01
     9   6     0.00   0.00  -0.01     0.06  -0.02   0.00     0.06  -0.02   0.00
    10   6    -0.06   0.03   0.00     0.00   0.00   0.00     0.00   0.00   0.02
    11   6     0.00   0.00   0.01    -0.06   0.02   0.00    -0.06   0.02   0.00
    12   6     0.07  -0.03   0.00     0.06  -0.02   0.00     0.05  -0.04  -0.01
    13   1     0.37   0.14  -0.01     0.31   0.12   0.01    -0.32  -0.11   0.01
    14   1     0.01   0.01   0.02    -0.34  -0.12   0.00     0.33   0.13   0.00
    15   1    -0.39  -0.11   0.00     0.00   0.00   0.00     0.00   0.00  -0.02
    16   1     0.01   0.01  -0.02     0.34   0.12   0.00    -0.33  -0.13   0.00
    17   1     0.37   0.14   0.01    -0.31  -0.12   0.01     0.32   0.11   0.01
    18   1    -0.37   0.14   0.01     0.31  -0.12   0.01     0.32  -0.11  -0.01
    19   1    -0.01   0.01  -0.02    -0.34   0.12   0.00    -0.33   0.13   0.00
    20   1     0.39  -0.11   0.00     0.00   0.00   0.00     0.00   0.00   0.02
    21   1    -0.01   0.01   0.02     0.34  -0.12   0.00     0.33  -0.13   0.00
    22   1    -0.37   0.14  -0.01    -0.31   0.12   0.01    -0.32   0.11  -0.01
                    25                     26                     27
                    B2                     B3                     B1
 Frequencies --   995.4668               995.7104              1006.5334
 Red. masses --     1.2724                 1.2633                 6.1799
 Frc consts  --     0.7429                 0.7380                 3.6888
 IR Inten    --     0.0575                 0.0854                 0.0248
  Atom  AN      X      Y      Z        X      Y      Z        X      Y      Z
     1   6     0.00   0.00   0.00     0.00   0.00   0.00     0.00   0.00  -0.07
     2   6     0.02   0.01   0.00    -0.02  -0.01   0.00     0.08  -0.23  -0.13
     3   6    -0.05  -0.02   0.00     0.05   0.02   0.00     0.01  -0.03   0.03
     4   6     0.06   0.02   0.00    -0.06  -0.02   0.00     0.00   0.00   0.27
     5   6    -0.05  -0.02   0.00     0.05   0.02   0.00    -0.01   0.03   0.03
     6   6     0.02   0.01   0.00    -0.02  -0.01   0.00    -0.08   0.23  -0.13
     7   6     0.00   0.00   0.00     0.00   0.00   0.00     0.00   0.00  -0.07
     8   6    -0.02   0.01   0.00    -0.02   0.01   0.00     0.08   0.23  -0.13
     9   6     0.05  -0.02   0.00     0.05  -0.02   0.00     0.01   0.03   0.03
    10   6    -0.06   0.02   0.00    -0.06   0.02   0.00     0.00   0.00   0.27
    11   6     0.05  -0.02   0.00     0.05  -0.02   0.00    -0.01  -0.03   0.03
    12   6    -0.02   0.01   0.00    -0.02   0.01   0.00    -0.08  -0.23  -0.13
    13   1    -0.19  -0.08   0.01     0.17   0.07   0.00     0.10  -0.26  -0.10
    14   1     0.34   0.12  -0.01    -0.34  -0.13   0.00     0.01  -0.03   0.06
    15   1    -0.36  -0.14   0.00     0.38   0.13   0.00     0.00   0.00   0.28
    16   1     0.34   0.12   0.01    -0.34  -0.13   0.00    -0.01   0.03   0.06
    17   1    -0.19  -0.08  -0.01     0.17   0.07   0.00    -0.10   0.26  -0.10
    18   1     0.19  -0.08  -0.01     0.17  -0.07   0.00     0.10   0.26  -0.10
    19   1    -0.34   0.12   0.01    -0.34   0.13   0.00     0.01   0.03   0.06
    20   1     0.36  -0.14   0.00     0.38  -0.13   0.00     0.00   0.00   0.28
    21   1    -0.34   0.12  -0.01    -0.34   0.13   0.00    -0.01  -0.03   0.06
    22   1     0.19  -0.08   0.01     0.17  -0.07   0.00    -0.10  -0.26  -0.10
                    28                     29                     30
                     A                     B1                      A
 Frequencies --  1011.7413              1018.7317              1048.1887
 Red. masses --     5.7312                 6.8773                 2.2040
 Frc consts  --     3.4565                 4.2052                 1.4267
 IR Inten    --     0.0000                 6.8779                 0.0000
  Atom  AN      X      Y      Z        X      Y      Z        X      Y      Z
     1   6     0.00   0.00   0.00     0.00   0.00   0.28     0.00   0.00   0.02
     2   6    -0.10   0.22   0.12     0.03  -0.06  -0.01     0.01  -0.04   0.04
     3   6     0.03  -0.04   0.02    -0.09   0.25  -0.14    -0.04   0.12  -0.02
     4   6     0.00   0.00  -0.25     0.00   0.00   0.02     0.00   0.00  -0.11
     5   6    -0.03   0.04   0.02     0.09  -0.25  -0.14     0.04  -0.12  -0.02
     6   6     0.10  -0.22   0.12    -0.03   0.06  -0.01    -0.01   0.04   0.04
     7   6     0.00   0.00   0.00     0.00   0.00   0.28     0.00   0.00  -0.02
     8   6     0.10   0.22  -0.12     0.03   0.06  -0.01    -0.01  -0.04  -0.04
     9   6    -0.03  -0.04  -0.02    -0.09  -0.25  -0.14     0.04   0.12   0.02
    10   6     0.00   0.00   0.25     0.00   0.00   0.02     0.00   0.00   0.11
    11   6     0.03   0.04  -0.02     0.09   0.25  -0.14    -0.04  -0.12   0.02
    12   6    -0.10  -0.22  -0.12    -0.03  -0.06  -0.01     0.01   0.04  -0.04
    13   1     0.01   0.31   0.07     0.02  -0.09   0.06     0.08  -0.14   0.25
    14   1    -0.05  -0.07  -0.01    -0.10   0.30  -0.08    -0.10   0.26   0.23
    15   1     0.00   0.00  -0.26     0.00   0.00   0.01     0.00   0.00  -0.12
    16   1     0.05   0.07  -0.01     0.10  -0.30  -0.08     0.10  -0.26   0.23
    17   1    -0.01  -0.31   0.07    -0.02   0.09   0.06    -0.08   0.14   0.25
    18   1    -0.01   0.31  -0.07     0.02   0.09   0.06    -0.08  -0.14  -0.25
    19   1     0.05  -0.07   0.01    -0.10  -0.30  -0.08     0.10   0.26  -0.23
    20   1     0.00   0.00   0.26     0.00   0.00   0.01     0.00   0.00   0.12
    21   1    -0.05   0.07   0.01     0.10   0.30  -0.08    -0.10  -0.26  -0.23
    22   1     0.01  -0.31  -0.07    -0.02  -0.09   0.06     0.08   0.14  -0.25
                    31                     32                     33
                    B1                     B2                     B3
 Frequencies --  1061.6942              1095.7376              1101.0739
 Red. masses --     1.7579                 1.6812                 1.5044
 Frc consts  --     1.1675                 1.1893                 1.0746
 IR Inten    --     3.4042                 8.7253                 0.7479
  Atom  AN      X      Y      Z        X      Y      Z        X      Y      Z
     1   6     0.00   0.00   0.11    -0.03   0.05   0.00     0.00  -0.03   0.00
     2   6    -0.02   0.04  -0.03     0.02  -0.04  -0.07    -0.01   0.02   0.07
     3   6     0.02  -0.04  -0.03     0.01  -0.04   0.04    -0.01   0.04  -0.04
     4   6     0.00   0.00   0.10    -0.02   0.06   0.00     0.02  -0.06   0.00
     5   6    -0.02   0.04  -0.03     0.01  -0.04  -0.04    -0.01   0.04   0.04
     6   6     0.02  -0.04  -0.03     0.02  -0.04   0.07    -0.01   0.02  -0.07
     7   6     0.00   0.00   0.11     0.03   0.05   0.00     0.00   0.03   0.00
     8   6    -0.02  -0.04  -0.03    -0.02  -0.04   0.07    -0.01  -0.02   0.07
     9   6     0.02   0.04  -0.03    -0.01  -0.04  -0.04    -0.01  -0.04  -0.04
    10   6     0.00   0.00   0.10     0.02   0.06   0.00     0.02   0.06   0.00
    11   6    -0.02  -0.04  -0.03    -0.01  -0.04   0.04    -0.01  -0.04   0.04
    12   6     0.02   0.04  -0.03    -0.02  -0.04  -0.07    -0.01  -0.02  -0.07
    13   1    -0.06   0.18  -0.28    -0.08   0.06  -0.30     0.02  -0.12   0.34
    14   1     0.07  -0.18  -0.28     0.00   0.04   0.20     0.01  -0.04  -0.18
    15   1     0.00   0.00   0.10    -0.15   0.40   0.00     0.14  -0.37   0.00
    16   1    -0.07   0.18  -0.28     0.00   0.04  -0.20     0.01  -0.04   0.18
    17   1     0.06  -0.18  -0.28    -0.08   0.06   0.30     0.02  -0.12  -0.34
    18   1    -0.06  -0.18  -0.28     0.08   0.06   0.30     0.02   0.12   0.34
    19   1     0.07   0.18  -0.28     0.00   0.04  -0.20     0.01   0.04  -0.18
    20   1     0.00   0.00   0.10     0.15   0.40   0.00     0.14   0.37   0.00
    21   1    -0.07  -0.18  -0.28     0.00   0.04   0.20     0.01   0.04   0.18
    22   1     0.06   0.18  -0.28     0.08   0.06  -0.30     0.02   0.12  -0.34
                    34                     35                     36
                    B3                     B2                     B1
 Frequencies --  1176.6930              1177.0984              1197.0502
 Red. masses --     1.1067                 1.1054                 1.1289
 Frc consts  --     0.9029                 0.9024                 0.9531
 IR Inten    --     0.0001                 0.0467                 0.4029
  Atom  AN      X      Y      Z        X      Y      Z        X      Y      Z
     1   6     0.00   0.00   0.00     0.00   0.00   0.00     0.00   0.00   0.00
     2   6     0.00  -0.01   0.00     0.00  -0.01   0.01    -0.01   0.02  -0.03
     3   6     0.01  -0.02  -0.03     0.01  -0.01  -0.03    -0.01   0.02   0.03
     4   6    -0.02   0.04   0.00    -0.02   0.04   0.00     0.00   0.00   0.00
     5   6     0.01  -0.02   0.03     0.01  -0.01   0.03     0.01  -0.02   0.03
     6   6     0.00  -0.01   0.00     0.00  -0.01  -0.01     0.01  -0.02  -0.03
     7   6     0.00   0.00   0.00     0.00   0.00   0.00     0.00   0.00   0.00
     8   6     0.00   0.01   0.00     0.00  -0.01  -0.01    -0.01  -0.02  -0.03
     9   6     0.01   0.02  -0.03    -0.01  -0.01   0.03    -0.01  -0.02   0.03
    10   6    -0.02  -0.04   0.00     0.02   0.04   0.00     0.00   0.00   0.00
    11   6     0.01   0.02   0.03    -0.01  -0.01  -0.03     0.01   0.02   0.03
    12   6     0.00   0.01   0.00     0.00  -0.01   0.01     0.01   0.02  -0.03
    13   1     0.02  -0.06   0.10     0.03  -0.06   0.12    -0.06   0.16  -0.31
    14   1     0.06  -0.16  -0.30     0.05  -0.16  -0.30    -0.06   0.16   0.30
    15   1    -0.16   0.45   0.00    -0.16   0.44   0.00     0.00   0.00   0.00
    16   1     0.06  -0.16   0.30     0.05  -0.16   0.30     0.06  -0.16   0.30
    17   1     0.02  -0.06  -0.10     0.03  -0.06  -0.12     0.06  -0.16  -0.31
    18   1     0.02   0.06   0.10    -0.03  -0.06  -0.12    -0.06  -0.16  -0.31
    19   1     0.06   0.16  -0.30    -0.05  -0.16   0.30    -0.06  -0.16   0.30
    20   1    -0.16  -0.45   0.00     0.16   0.44   0.00     0.00   0.00   0.00
    21   1     0.06   0.16   0.30    -0.05  -0.16  -0.30     0.06   0.16   0.30
    22   1     0.02   0.06  -0.10    -0.03  -0.06   0.12     0.06   0.16  -0.31
                    37                     38                     39
                     A                     B2                      A
 Frequencies --  1203.1243              1295.0244              1297.7520
 Red. masses --     1.1354                 2.6143                 3.2978
 Frc consts  --     0.9683                 2.5832                 3.2723
 IR Inten    --     0.0000                 1.9553                 0.0000
  Atom  AN      X      Y      Z        X      Y      Z        X      Y      Z
     1   6     0.00   0.00   0.01    -0.08   0.19   0.00     0.00   0.00   0.28
     2   6    -0.01   0.02  -0.04     0.02  -0.06   0.05     0.01  -0.03   0.06
     3   6    -0.01   0.02   0.03     0.02  -0.05  -0.06    -0.02   0.06  -0.06
     4   6     0.00   0.00   0.01    -0.02   0.05   0.00     0.00   0.00   0.00
     5   6     0.01  -0.02   0.03     0.02  -0.05   0.06     0.02  -0.06  -0.06
     6   6     0.01  -0.02  -0.04     0.02  -0.06  -0.05    -0.01   0.03   0.06
     7   6     0.00   0.00  -0.01     0.08   0.19   0.00     0.00   0.00  -0.28
     8   6     0.01   0.02   0.04    -0.02  -0.06  -0.05    -0.01  -0.03  -0.06
     9   6     0.01   0.02  -0.03    -0.02  -0.05   0.06     0.02   0.06   0.06
    10   6     0.00   0.00  -0.01     0.02   0.05   0.00     0.00   0.00   0.00
    11   6    -0.01  -0.02  -0.03    -0.02  -0.05  -0.06    -0.02  -0.06   0.06
    12   6    -0.01  -0.02   0.04    -0.02  -0.06   0.05     0.01   0.03  -0.06
    13   1    -0.07   0.16  -0.32     0.08  -0.21   0.32    -0.05   0.17  -0.28
    14   1    -0.06   0.16   0.29    -0.04   0.10   0.22     0.02  -0.06  -0.29
    15   1     0.00   0.00   0.01     0.03  -0.08   0.00     0.00   0.00   0.00
    16   1     0.06  -0.16   0.29    -0.04   0.10  -0.22    -0.02   0.06  -0.29
    17   1     0.07  -0.16  -0.32     0.08  -0.21  -0.32     0.05  -0.17  -0.28
    18   1     0.07   0.16   0.32    -0.08  -0.21  -0.32     0.05   0.17   0.28
    19   1     0.06   0.16  -0.29     0.04   0.10  -0.22    -0.02  -0.06   0.29
    20   1     0.00   0.00  -0.01    -0.03  -0.08   0.00     0.00   0.00   0.00
    21   1    -0.06  -0.16  -0.29     0.04   0.10   0.22     0.02   0.06   0.29
    22   1    -0.07  -0.16   0.32    -0.08  -0.21   0.32    -0.05  -0.17   0.28
                    40                     41                     42
                    B3                     B3                     B2
 Frequencies --  1325.7852              1345.6110              1351.8515
 Red. masses --     7.0614                 1.3374                 1.9290
 Frc consts  --     7.3129                 1.4268                 2.0771
 IR Inten    --     0.0281                 0.0446                 0.8004
  Atom  AN      X      Y      Z        X      Y      Z        X      Y      Z
     1   6     0.08  -0.27   0.00     0.01  -0.06   0.00     0.00   0.01   0.00
     2   6    -0.03   0.10  -0.16     0.01  -0.02   0.06     0.02  -0.04   0.10
     3   6    -0.04   0.10   0.18    -0.01   0.01   0.00     0.01  -0.02  -0.05
     4   6     0.06  -0.18   0.00    -0.02   0.05   0.00    -0.04   0.10   0.00
     5   6    -0.04   0.10  -0.18    -0.01   0.01   0.00     0.01  -0.02   0.05
     6   6    -0.03   0.10   0.16     0.01  -0.02  -0.06     0.02  -0.04  -0.10
     7   6     0.08   0.27   0.00     0.01   0.06   0.00     0.00   0.01   0.00
     8   6    -0.03  -0.10  -0.16     0.01   0.02   0.06    -0.02  -0.04  -0.10
     9   6    -0.04  -0.10   0.18    -0.01  -0.01   0.00    -0.01  -0.02   0.05
    10   6     0.06   0.18   0.00    -0.02  -0.05   0.00     0.04   0.10   0.00
    11   6    -0.04  -0.10  -0.18    -0.01  -0.01   0.00    -0.01  -0.02  -0.05
    12   6    -0.03  -0.10   0.16     0.01   0.02  -0.06    -0.02  -0.04   0.10
    13   1    -0.02   0.01   0.00    -0.07   0.19  -0.33    -0.08   0.20  -0.35
    14   1     0.06  -0.13  -0.27     0.04  -0.11  -0.23     0.02  -0.07  -0.15
    15   1    -0.06   0.17   0.00     0.08  -0.21   0.00     0.10  -0.25   0.00
    16   1     0.06  -0.13   0.27     0.04  -0.11   0.23     0.02  -0.07   0.15
    17   1    -0.02   0.01   0.00    -0.07   0.19   0.33    -0.08   0.20   0.35
    18   1    -0.02  -0.01   0.00    -0.07  -0.19  -0.33     0.08   0.20   0.35
    19   1     0.06   0.13  -0.27     0.04   0.11  -0.23    -0.02  -0.07   0.15
    20   1    -0.06  -0.17   0.00     0.08   0.21   0.00    -0.10  -0.25   0.00
    21   1     0.06   0.13   0.27     0.04   0.11   0.23    -0.02  -0.07  -0.15
    22   1    -0.02  -0.01   0.00    -0.07  -0.19   0.33     0.08   0.20  -0.35
                    43                     44                     45
                    B2                     B3                     B1
 Frequencies --  1454.3095              1481.8222              1507.7377
 Red. masses --     2.0916                 2.3199                 2.0597
 Frc consts  --     2.6064                 3.0013                 2.7587
 IR Inten    --     8.9536                 1.4243                32.6018
  Atom  AN      X      Y      Z        X      Y      Z        X      Y      Z
     1   6     0.04  -0.08   0.00     0.03  -0.12   0.00     0.00   0.00  -0.07
     2   6    -0.02   0.04   0.06    -0.01   0.04   0.07     0.02  -0.07   0.06
     3   6     0.01  -0.02  -0.12     0.00   0.01  -0.10    -0.03   0.07   0.07
     4   6     0.02  -0.05   0.00     0.04  -0.10   0.00     0.00   0.00  -0.07
     5   6     0.01  -0.02   0.12     0.00   0.01   0.10     0.03  -0.07   0.07
     6   6    -0.02   0.04  -0.06    -0.01   0.04  -0.07    -0.02   0.07   0.06
     7   6    -0.04  -0.08   0.00     0.03   0.12   0.00     0.00   0.00  -0.07
     8   6     0.02   0.04  -0.06    -0.01  -0.04   0.07     0.02   0.07   0.06
     9   6    -0.01  -0.02   0.12     0.00  -0.01  -0.10    -0.03  -0.07   0.07
    10   6    -0.02  -0.05   0.00     0.04   0.10   0.00     0.00   0.00  -0.07
    11   6    -0.01  -0.02  -0.12     0.00  -0.01   0.10     0.03   0.07   0.07
    12   6     0.02   0.04   0.06    -0.01  -0.04  -0.07    -0.02  -0.07   0.06
    13   1    -0.03   0.11  -0.04    -0.06   0.14  -0.10    -0.04   0.12  -0.30
    14   1    -0.08   0.20   0.27    -0.07   0.19   0.20     0.05  -0.12  -0.31
    15   1    -0.15   0.40   0.00    -0.16   0.43   0.00     0.00   0.00  -0.09
    16   1    -0.08   0.20  -0.27    -0.07   0.19  -0.20    -0.05   0.12  -0.31
    17   1    -0.03   0.11   0.04    -0.06   0.14   0.10     0.04  -0.12  -0.30
    18   1     0.03   0.11   0.04    -0.06  -0.14  -0.10    -0.04  -0.12  -0.30
    19   1     0.08   0.20  -0.27    -0.07  -0.19   0.20     0.05   0.12  -0.31
    20   1     0.15   0.40   0.00    -0.16  -0.43   0.00     0.00   0.00  -0.09
    21   1     0.08   0.20   0.27    -0.07  -0.19  -0.20    -0.05  -0.12  -0.31
    22   1     0.03   0.11  -0.04    -0.06  -0.14   0.10     0.04   0.12  -0.30
                    46                     47                     48
                     A                     B2                     B3
 Frequencies --  1530.7671              1604.4490              1620.2525
 Red. masses --     2.5023                 4.9833                 5.9935
 Frc consts  --     3.4547                 7.5581                 9.2703
 IR Inten    --     0.0000                 4.6484                 0.2087
  Atom  AN      X      Y      Z        X      Y      Z        X      Y      Z
     1   6     0.00   0.00  -0.14     0.06  -0.15   0.00     0.07  -0.23   0.00
     2   6     0.02  -0.06   0.04    -0.04   0.11  -0.08    -0.05   0.13  -0.06
     3   6    -0.03   0.07   0.09     0.05  -0.14  -0.03     0.05  -0.14  -0.06
     4   6     0.00   0.00  -0.08    -0.09   0.25   0.00    -0.09   0.25   0.00
     5   6     0.03  -0.07   0.09     0.05  -0.14   0.03     0.05  -0.14   0.06
     6   6    -0.02   0.06   0.04    -0.04   0.11   0.08    -0.05   0.13   0.06
     7   6     0.00   0.00   0.14    -0.06  -0.15   0.00     0.07   0.23   0.00
     8   6    -0.02  -0.06  -0.04     0.04   0.11   0.08    -0.05  -0.13  -0.06
     9   6     0.03   0.07  -0.09    -0.05  -0.14   0.03     0.05   0.14  -0.06
    10   6     0.00   0.00   0.08     0.09   0.25   0.00    -0.09  -0.25   0.00
    11   6    -0.03  -0.07  -0.09    -0.05  -0.14  -0.03     0.05   0.14   0.06
    12   6     0.02   0.06  -0.04     0.04   0.11  -0.08    -0.05  -0.13   0.06
    13   1    -0.05   0.10  -0.29     0.04  -0.05   0.23    -0.01  -0.01   0.20
    14   1     0.05  -0.13  -0.31     0.02  -0.05   0.15     0.01  -0.03   0.19
    15   1     0.00   0.00  -0.10     0.14  -0.37   0.00     0.12  -0.32   0.00
    16   1    -0.05   0.13  -0.31     0.02  -0.05  -0.15     0.01  -0.03  -0.19
    17   1     0.05  -0.10  -0.29     0.04  -0.05  -0.23    -0.01  -0.01  -0.20
    18   1     0.05   0.10   0.29    -0.04  -0.05  -0.23    -0.01   0.01   0.20
    19   1    -0.05  -0.13   0.31    -0.02  -0.05  -0.15     0.01   0.03   0.19
    20   1     0.00   0.00   0.10    -0.14  -0.37   0.00     0.12   0.32   0.00
    21   1     0.05   0.13   0.31    -0.02  -0.05   0.15     0.01   0.03  -0.19
    22   1    -0.05  -0.10   0.29    -0.04  -0.05   0.23    -0.01   0.01  -0.20
                    49                     50                     51
                     A                     B1                     B1
 Frequencies --  1637.9312              1639.3526              3157.1491
 Red. masses --     5.6031                 5.6560                 1.0845
 Frc consts  --     8.8566                 8.9558                 6.3692
 IR Inten    --     0.0000                12.1769                 8.1599
  Atom  AN      X      Y      Z        X      Y      Z        X      Y      Z
     1   6     0.00   0.00  -0.18     0.00   0.00   0.12     0.00   0.00   0.00
     2   6     0.02  -0.05   0.20    -0.02   0.05  -0.21    -0.01   0.02   0.01
     3   6     0.02  -0.05  -0.19    -0.02   0.05   0.20     0.01  -0.02   0.01
     4   6     0.00   0.00   0.10     0.00   0.00  -0.10     0.00   0.00  -0.03
     5   6    -0.02   0.05  -0.19     0.02  -0.05   0.20    -0.01   0.02   0.01
     6   6    -0.02   0.05   0.20     0.02  -0.05  -0.21     0.01  -0.02   0.01
     7   6     0.00   0.00   0.18     0.00   0.00   0.12     0.00   0.00   0.00
     8   6    -0.02  -0.05  -0.20    -0.02  -0.05  -0.21    -0.01  -0.02   0.01
     9   6    -0.02  -0.05   0.19    -0.02  -0.05   0.20     0.01   0.02   0.01
    10   6     0.00   0.00  -0.10     0.00   0.00  -0.10     0.00   0.00  -0.03
    11   6     0.02   0.05   0.19     0.02   0.05   0.20    -0.01  -0.02   0.01
    12   6     0.02   0.05  -0.20     0.02   0.05  -0.21     0.01   0.02   0.01
    13   1    -0.08   0.17  -0.22     0.06  -0.17   0.20     0.08  -0.21  -0.13
    14   1    -0.06   0.15   0.17     0.06  -0.16  -0.18    -0.11   0.29  -0.18
    15   1     0.00   0.00   0.11     0.00   0.00  -0.12     0.00   0.00   0.33
    16   1     0.06  -0.15   0.17    -0.06   0.16  -0.18     0.11  -0.29  -0.18
    17   1     0.08  -0.17  -0.22    -0.06   0.17   0.20    -0.08   0.21  -0.13
    18   1     0.08   0.17   0.22     0.06   0.17   0.20     0.08   0.21  -0.13
    19   1     0.06   0.15  -0.17     0.06   0.16  -0.18    -0.11  -0.29  -0.18
    20   1     0.00   0.00  -0.11     0.00   0.00  -0.12     0.00   0.00   0.33
    21   1    -0.06  -0.15  -0.17    -0.06  -0.16  -0.18     0.11   0.29  -0.18
    22   1    -0.08  -0.17   0.22    -0.06  -0.17   0.20    -0.08  -0.21  -0.13
                    52                     53                     54
                     A                     B3                     B2
 Frequencies --  3158.1616              3162.0491              3165.0261
 Red. masses --     1.0845                 1.0871                 1.0871
 Frc consts  --     6.3729                 6.4043                 6.4161
 IR Inten    --     0.0000                 0.0129                 2.6178
  Atom  AN      X      Y      Z        X      Y      Z        X      Y      Z
     1   6     0.00   0.00   0.00     0.00   0.00   0.00     0.00   0.00   0.00
     2   6     0.01  -0.01  -0.01     0.01  -0.03  -0.02    -0.01   0.02   0.01
     3   6    -0.01   0.03  -0.02    -0.01   0.02  -0.01     0.01  -0.03   0.02
     4   6     0.00   0.00   0.03     0.00   0.00   0.00     0.00   0.00   0.00
     5   6     0.01  -0.03  -0.02    -0.01   0.02   0.01     0.01  -0.03  -0.02
     6   6    -0.01   0.01  -0.01     0.01  -0.03   0.02    -0.01   0.02  -0.01
     7   6     0.00   0.00   0.00     0.00   0.00   0.00     0.00   0.00   0.00
     8   6    -0.01  -0.01   0.01     0.01   0.03  -0.02     0.01   0.02  -0.01
     9   6     0.01   0.03   0.02    -0.01  -0.02  -0.01    -0.01  -0.03  -0.02
    10   6     0.00   0.00  -0.03     0.00   0.00   0.00     0.00   0.00   0.00
    11   6    -0.01  -0.03   0.02    -0.01  -0.02   0.01    -0.01  -0.03   0.02
    12   6     0.01   0.01   0.01     0.01   0.03   0.02     0.01   0.02   0.01
    13   1    -0.07   0.17   0.10    -0.12   0.31   0.19     0.11  -0.27  -0.16
    14   1     0.11  -0.30   0.18     0.10  -0.26   0.16    -0.11   0.30  -0.18
    15   1     0.00   0.00  -0.37     0.00   0.00   0.00     0.00   0.00   0.00
    16   1    -0.11   0.30   0.18     0.10  -0.26  -0.16    -0.11   0.30   0.18
    17   1     0.07  -0.17   0.10    -0.12   0.31  -0.19     0.11  -0.27   0.16
    18   1     0.07   0.17  -0.10    -0.12  -0.31   0.19    -0.11  -0.27   0.16
    19   1    -0.11  -0.30  -0.18     0.10   0.26   0.16     0.11   0.30   0.18
    20   1     0.00   0.00   0.37     0.00   0.00   0.00     0.00   0.00   0.00
    21   1     0.11   0.30  -0.18     0.10   0.26  -0.16     0.11   0.30  -0.18
    22   1    -0.07  -0.17  -0.10    -0.12  -0.31  -0.19    -0.11  -0.27  -0.16
                    55                     56                     57
                    B1                      A                     B3
 Frequencies --  3171.5925              3174.7845              3178.4110
 Red. masses --     1.0908                 1.0910                 1.0949
 Frc consts  --     6.4649                 6.4788                 6.5170
 IR Inten    --    18.9299                 0.0000                 8.1241
  Atom  AN      X      Y      Z        X      Y      Z        X      Y      Z
     1   6     0.00   0.00   0.00     0.00   0.00   0.00     0.00   0.00   0.00
     2   6    -0.01   0.03   0.02     0.01  -0.03  -0.02     0.01  -0.02  -0.02
     3   6     0.00   0.01  -0.01     0.00   0.00   0.00     0.01  -0.03   0.02
     4   6     0.00   0.00   0.04     0.00   0.00  -0.04     0.00   0.00   0.00
     5   6     0.00  -0.01  -0.01     0.00   0.00   0.00     0.01  -0.03  -0.02
     6   6     0.01  -0.03   0.02    -0.01   0.03  -0.02     0.01  -0.02   0.02
     7   6     0.00   0.00   0.00     0.00   0.00   0.00     0.00   0.00   0.00
     8   6    -0.01  -0.03   0.02    -0.01  -0.03   0.02     0.01   0.02  -0.02
     9   6     0.00  -0.01  -0.01     0.00   0.00   0.00     0.01   0.03   0.02
    10   6     0.00   0.00   0.04     0.00   0.00   0.04     0.00   0.00   0.00
    11   6     0.00   0.01  -0.01     0.00   0.00   0.00     0.01   0.03  -0.02
    12   6     0.01   0.03   0.02     0.01   0.03   0.02     0.01   0.02   0.02
    13   1     0.12  -0.31  -0.19    -0.13   0.32   0.20    -0.10   0.25   0.16
    14   1     0.03  -0.07   0.05    -0.01   0.01  -0.01    -0.12   0.31  -0.19
    15   1     0.00   0.00  -0.42     0.00   0.00   0.42     0.00   0.00   0.00
    16   1    -0.03   0.07   0.05     0.01  -0.01  -0.01    -0.12   0.31   0.19
    17   1    -0.12   0.31  -0.19     0.13  -0.32   0.20    -0.10   0.25  -0.16
    18   1     0.12   0.31  -0.19     0.13   0.32  -0.20    -0.10  -0.25   0.16
    19   1     0.03   0.07   0.05     0.01   0.01   0.01    -0.12  -0.31  -0.19
    20   1     0.00   0.00  -0.42     0.00   0.00  -0.42     0.00   0.00   0.00
    21   1    -0.03  -0.07   0.05    -0.01  -0.01   0.01    -0.12  -0.31   0.19
    22   1    -0.12  -0.31  -0.19    -0.13  -0.32  -0.20    -0.10  -0.25  -0.16
                    58                     59                     60
                    B2                     B1                      A
 Frequencies --  3180.3740              3188.3425              3189.2864
 Red. masses --     1.0942                 1.0986                 1.0985
 Frc consts  --     6.5209                 6.5798                 6.5833
 IR Inten    --    45.3151                34.7115                 0.0000
  Atom  AN      X      Y      Z        X      Y      Z        X      Y      Z
     1   6     0.00   0.00   0.00     0.00   0.00   0.00     0.00   0.00   0.00
     2   6    -0.01   0.03   0.02     0.00   0.01   0.01    -0.01   0.02   0.01
     3   6    -0.01   0.02  -0.02    -0.01   0.03  -0.01    -0.01   0.03  -0.01
     4   6     0.00   0.00   0.00     0.00   0.00  -0.04     0.00   0.00  -0.04
     5   6    -0.01   0.02   0.02     0.01  -0.03  -0.01     0.01  -0.03  -0.01
     6   6    -0.01   0.03  -0.02     0.00  -0.01   0.01     0.01  -0.02   0.01
     7   6     0.00   0.00   0.00     0.00   0.00   0.00     0.00   0.00   0.00
     8   6     0.01   0.03  -0.02     0.00  -0.01   0.01     0.01   0.02  -0.01
     9   6     0.01   0.02   0.02    -0.01  -0.03  -0.01     0.01   0.03   0.01
    10   6     0.00   0.00   0.00     0.00   0.00  -0.04     0.00   0.00   0.04
    11   6     0.01   0.02  -0.02     0.01   0.03  -0.01    -0.01  -0.03   0.01
    12   6     0.01   0.03   0.02     0.00   0.01   0.01    -0.01  -0.02  -0.01
    13   1     0.12  -0.30  -0.18     0.05  -0.14  -0.09     0.07  -0.17  -0.11
    14   1     0.10  -0.27   0.17     0.10  -0.27   0.17     0.10  -0.27   0.16
    15   1     0.00   0.00   0.00     0.00   0.00   0.46     0.00   0.00   0.43
    16   1     0.10  -0.27  -0.17    -0.10   0.27   0.17    -0.10   0.27   0.16
    17   1     0.12  -0.30   0.18    -0.05   0.14  -0.09    -0.07   0.17  -0.11
    18   1    -0.12  -0.30   0.18     0.05   0.14  -0.09    -0.07  -0.17   0.11
    19   1    -0.10  -0.27  -0.17     0.10   0.27   0.17    -0.10  -0.27  -0.16
    20   1     0.00   0.00   0.00     0.00   0.00   0.46     0.00   0.00  -0.43
    21   1    -0.10  -0.27   0.17    -0.10  -0.27   0.17     0.10   0.27  -0.16
    22   1    -0.12  -0.30  -0.18    -0.05  -0.14  -0.09     0.07   0.17   0.11
    
    
    
    Vibrational Energies and Rotational Constants (cm-1)
 Mode(Quanta)     E(harm)     E(anharm)    Aa(z)       Ba(x)       Ca(y)
 Equilibrium Geometry                     0.095273    0.018154    0.015851
 Ground State   39564.996    39102.418    0.094559    0.018026    0.015773
 Fundamental Bands (DE w.r.t. Ground State)
  1(1)           3189.286     3046.849    0.094533    0.018023    0.015771
  2(1)           3174.785     3046.304    0.094536    0.018020    0.015772
  3(1)           3158.162     3015.969    0.094537    0.018023    0.015771
  4(1)           1637.931     1597.788    0.094485    0.018013    0.015777
  5(1)           1530.767     1491.590    0.094489    0.018016    0.015768
  6(1)           1297.752     1271.016    0.094543    0.017994    0.015732
  7(1)           1203.124     1167.898    0.094538    0.018023    0.015776
  8(1)           1048.189     1022.608    0.094514    0.018024    0.015768
  9(1)           1011.741      999.020    0.094578    0.018023    0.015767
 10(1)            977.567      959.146    0.094480    0.018023    0.015772
 11(1)            854.831      830.573    0.094546    0.018025    0.015769
 12(1)            751.177      742.429    0.094549    0.018016    0.015767
 13(1)            417.170      402.282    0.094515    0.018028    0.015776
 14(1)            311.157      305.326    0.094560    0.018021    0.015771
 15(1)             67.171       34.268    0.094560    0.018008    0.015775
 16(1)           3188.342     3057.344    0.094533    0.018024    0.015771
 17(1)           3171.592     3048.757    0.094536    0.018022    0.015771
 18(1)           3157.149     3014.795    0.094537    0.018023    0.015771
 19(1)           1639.353     1596.761    0.094491    0.018015    0.015770
 20(1)           1507.738     1472.149    0.094505    0.018025    0.015771
 21(1)           1197.050     1164.881    0.094540    0.018028    0.015773
 22(1)           1061.694     1033.631    0.094504    0.018025    0.015760
 23(1)           1018.732     1003.506    0.094584    0.018022    0.015766
 24(1)           1006.533      990.696    0.094551    0.018021    0.015766
 25(1)            975.829      961.323    0.094496    0.018023    0.015772
 26(1)            853.997      833.878    0.094559    0.018023    0.015772
 27(1)            619.703      612.985    0.094586    0.018022    0.015750
 28(1)            410.489      403.589    0.094513    0.018030    0.015777
 29(1)           3180.374     3070.668    0.094537    0.018021    0.015771
 30(1)           3165.026     3039.341    0.094538    0.018021    0.015771
 31(1)           1604.449     1553.205    0.094492    0.018015    0.015755
 32(1)           1454.310     1427.835    0.094573    0.018017    0.015762
 33(1)           1351.851     1318.167    0.094529    0.018015    0.015769
 34(1)           1295.024     1257.806    0.094483    0.018011    0.015760
 35(1)           1177.098     1161.987    0.094606    0.018024    0.015772
 36(1)           1095.738     1065.339    0.094600    0.018014    0.015779
 37(1)            995.467      977.905    0.094482    0.018023    0.015772
 38(1)            935.765      911.445    0.094496    0.018024    0.015772
 39(1)            792.810      780.387    0.094518    0.018027    0.015775
 40(1)            709.882      692.071    0.094580    0.018026    0.015769
 41(1)            635.326      629.094    0.094532    0.018025    0.015790
 42(1)            554.659      546.779    0.094510    0.018027    0.015776
 43(1)            266.748      245.692    0.094389    0.018029    0.015771
 44(1)            124.535      122.131    0.095193    0.018031    0.015787
 45(1)           3178.411     3049.546    0.094537    0.018022    0.015770
 46(1)           3162.049     3035.523    0.094538    0.018022    0.015771
 47(1)           1620.253     1576.984    0.094485    0.018011    0.015742
 48(1)           1481.822     1449.987    0.094575    0.018014    0.015764
 49(1)           1345.611     1294.273    0.094566    0.018025    0.015773
 50(1)           1325.785     1285.191    0.094463    0.018009    0.015766
 51(1)           1176.693     1162.683    0.094610    0.018025    0.015771
 52(1)           1101.074     1070.170    0.094600    0.018021    0.015771
 53(1)            995.710      979.511    0.094480    0.018023    0.015772
 54(1)            918.115      898.259    0.094498    0.018026    0.015774
 55(1)            751.750      740.358    0.094526    0.018030    0.015770
 56(1)            712.542      700.759    0.094594    0.018026    0.015773
 57(1)            623.348      615.820    0.094555    0.018027    0.015769
 58(1)            498.934      489.929    0.094577    0.018036    0.015757
 59(1)            365.944      356.251    0.094681    0.018016    0.015790
 60(1)             93.879       90.777    0.093885    0.018041    0.015789
