# Supplementary material for: Low-energy vibrational spectra of flexible diphenyl molecules: biphenyl, diphenylmethane, bibenzyl and 2-, 3- and 4-phenyltoluene
Source: Royal Society of Chemistry journal article supplement (doi:10.1039/c4cp03278k), 2014-01-01
Supplement: c4cp03278k7.log [file c4cp03278k7.log]

Harmonic frequencies (cm**-1), IR intensities (KM/Mole), Raman scattering
 activities (A**4/AMU), depolarization ratios for plane and unpolarized
 incident light, reduced masses (AMU), force constants (mDyne/A),
 and normal coordinates:
                     1                      2                      3
                     B                      A                      A
 Frequencies --    18.1400                21.2401                64.2211
 Red. masses --     3.6771                 3.7402                 4.7493
 Frc consts  --     0.0007                 0.0010                 0.0115
 IR Inten    --     0.0576                 0.0034                 0.1319
  Atom  AN      X      Y      Z        X      Y      Z        X      Y      Z
     1   6     0.11   0.01   0.02     0.03  -0.03  -0.03     0.05   0.19   0.14
     2   6     0.13   0.11   0.07    -0.06  -0.09  -0.14     0.00   0.09   0.07
     3   6     0.03   0.10   0.05    -0.07  -0.07  -0.12    -0.03   0.01  -0.06
     4   1     0.22   0.20   0.11    -0.13  -0.14  -0.25     0.00   0.07   0.12
     5   6     0.00  -0.10  -0.04     0.12   0.03   0.12     0.05   0.20   0.07
     6   1     0.19   0.01   0.03     0.04  -0.05  -0.04     0.08   0.26   0.25
     7   6    -0.08  -0.01  -0.01     0.02  -0.01   0.02    -0.01   0.03  -0.11
     8   1     0.05   0.18   0.08    -0.14  -0.11  -0.21    -0.05  -0.06  -0.10
     9   6    -0.10  -0.11  -0.05     0.12   0.05   0.14     0.02   0.12  -0.05
    10   1    -0.02  -0.18  -0.08     0.20   0.07   0.21     0.08   0.28   0.13
    11   1    -0.19  -0.20  -0.10     0.19   0.10   0.25     0.03   0.14  -0.10
    12   6    -0.18  -0.01   0.00     0.00   0.00   0.03     0.00   0.00  -0.15
    13   6    -0.08  -0.01   0.01    -0.02   0.01   0.02     0.01  -0.03  -0.11
    14   1    -0.25   0.00  -0.10     0.00   0.01   0.03     0.00  -0.02  -0.15
    15   1    -0.25   0.00   0.10     0.00  -0.01   0.03     0.00   0.02  -0.15
    16   6    -0.10  -0.11   0.05    -0.12  -0.05   0.14    -0.02  -0.12  -0.05
    17   6     0.03   0.10  -0.05     0.07   0.07  -0.12     0.03  -0.01  -0.06
    18   6     0.00  -0.10   0.04    -0.12  -0.03   0.12    -0.05  -0.20   0.07
    19   1    -0.19  -0.20   0.10    -0.19  -0.10   0.25    -0.03  -0.14  -0.10
    20   6     0.13   0.11  -0.07     0.06   0.09  -0.14     0.00  -0.09   0.07
    21   1     0.05   0.18  -0.08     0.14   0.11  -0.21     0.05   0.06  -0.10
    22   6     0.11   0.01  -0.02    -0.03   0.03  -0.03    -0.05  -0.19   0.14
    23   1    -0.02  -0.18   0.08    -0.20  -0.07   0.21    -0.08  -0.28   0.13
    24   1     0.22   0.20  -0.11     0.13   0.14  -0.25     0.00  -0.07   0.12
    25   1     0.19   0.01  -0.03    -0.04   0.05  -0.04    -0.08  -0.26   0.25
                     4                      5                      6
                     B                      A                      A
 Frequencies --   191.8962               223.6079               287.4484
 Red. masses --     4.0776                 4.2937                 4.7703
 Frc consts  --     0.0885                 0.1265                 0.2322
 IR Inten    --     1.6966                 0.6295                 0.0194
  Atom  AN      X      Y      Z        X      Y      Z        X      Y      Z
     1   6    -0.08  -0.11  -0.12    -0.12   0.00  -0.11     0.01   0.07  -0.13
     2   6     0.00   0.00  -0.01     0.00   0.00   0.02     0.02   0.17  -0.09
     3   6     0.06   0.10   0.14     0.16   0.04   0.09    -0.06   0.21   0.01
     4   1    -0.02   0.00  -0.07    -0.05  -0.06   0.04     0.05   0.22  -0.14
     5   6    -0.01  -0.07   0.02    -0.01   0.10  -0.05    -0.01   0.03   0.02
     6   1    -0.16  -0.21  -0.28    -0.27  -0.07  -0.21     0.03   0.00  -0.23
     7   6     0.04   0.07   0.16     0.16   0.05   0.03    -0.13   0.10   0.07
     8   1     0.08   0.15   0.18     0.21   0.02   0.14    -0.09   0.34   0.01
     9   6     0.05   0.03   0.17     0.15   0.14   0.03    -0.09   0.09   0.12
    10   1    -0.04  -0.13  -0.02    -0.06   0.14  -0.09     0.04  -0.08   0.04
    11   1     0.06   0.03   0.24     0.23   0.22   0.03    -0.09   0.07   0.20
    12   6    -0.07  -0.02   0.00     0.00   0.00  -0.02     0.00   0.00   0.03
    13   6     0.04   0.07  -0.16    -0.16  -0.05   0.03     0.13  -0.10   0.07
    14   1    -0.17  -0.12  -0.13     0.00   0.15  -0.02     0.00  -0.12   0.04
    15   1    -0.17  -0.12   0.13     0.00  -0.15  -0.02     0.00   0.12   0.04
    16   6     0.05   0.03  -0.17    -0.15  -0.14   0.03     0.09  -0.09   0.12
    17   6     0.06   0.10  -0.14    -0.16  -0.04   0.09     0.06  -0.21   0.01
    18   6    -0.01  -0.07  -0.02     0.01  -0.10  -0.05     0.01  -0.03   0.02
    19   1     0.06   0.03  -0.24    -0.23  -0.22   0.03     0.09  -0.07   0.20
    20   6     0.00   0.00   0.01     0.00   0.00   0.02    -0.02  -0.17  -0.09
    21   1     0.08   0.15  -0.18    -0.21  -0.02   0.14     0.09  -0.34   0.01
    22   6    -0.08  -0.11   0.12     0.12   0.00  -0.11    -0.01  -0.07  -0.13
    23   1    -0.04  -0.13   0.02     0.06  -0.14  -0.09    -0.04   0.08   0.04
    24   1    -0.02   0.00   0.07     0.05   0.06   0.04    -0.05  -0.22  -0.14
    25   1    -0.16  -0.21   0.28     0.27   0.07  -0.21    -0.03   0.00  -0.23
                     7                      8                      9
                     B                      B                      A
 Frequencies --   337.1708               410.9200               411.7498
 Red. masses --     1.9400                 2.9168                 2.9232
 Frc consts  --     0.1299                 0.2902                 0.2920
 IR Inten    --     0.9641                 0.2434                 0.0073
  Atom  AN      X      Y      Z        X      Y      Z        X      Y      Z
     1   6     0.04  -0.02   0.01     0.00   0.00   0.00     0.00   0.00   0.00
     2   6     0.00   0.02  -0.02    -0.08  -0.06  -0.10     0.08   0.06   0.10
     3   6    -0.06   0.04   0.02     0.08   0.07   0.11    -0.08  -0.07  -0.10
     4   1     0.03   0.06  -0.06    -0.18  -0.14  -0.23     0.18   0.14   0.23
     5   6     0.01  -0.05   0.02     0.08   0.07   0.11    -0.08  -0.07  -0.11
     6   1     0.09  -0.02   0.01    -0.01  -0.01  -0.01     0.01   0.00   0.01
     7   6    -0.07   0.03   0.04     0.00   0.00   0.00     0.00   0.00   0.00
     8   1    -0.07   0.08   0.02     0.18   0.14   0.23    -0.18  -0.14  -0.22
     9   6    -0.06  -0.02   0.05    -0.08  -0.06  -0.10     0.08   0.06   0.10
    10   1     0.04  -0.09   0.04     0.18   0.14   0.23    -0.17  -0.14  -0.22
    11   1    -0.08  -0.06   0.10    -0.18  -0.14  -0.23     0.18   0.14   0.23
    12   6     0.18   0.02   0.00     0.00   0.00   0.00     0.00   0.00  -0.01
    13   6    -0.07   0.03  -0.04     0.00   0.00   0.00     0.00   0.00   0.00
    14   1     0.48  -0.01   0.40    -0.01  -0.01  -0.01     0.00  -0.01   0.00
    15   1     0.48  -0.01  -0.40    -0.01  -0.01   0.01     0.00   0.01   0.00
    16   6    -0.06  -0.02  -0.05    -0.08  -0.06   0.10    -0.08  -0.06   0.10
    17   6    -0.06   0.04  -0.02     0.08   0.07  -0.11     0.08   0.07  -0.10
    18   6     0.01  -0.05  -0.02     0.08   0.07  -0.11     0.08   0.07  -0.11
    19   1    -0.08  -0.06  -0.10    -0.18  -0.14   0.23    -0.18  -0.14   0.23
    20   6     0.00   0.02   0.02    -0.08  -0.06   0.10    -0.08  -0.06   0.10
    21   1    -0.07   0.08  -0.02     0.18   0.14  -0.23     0.18   0.14  -0.22
    22   6     0.04  -0.02  -0.01     0.00   0.00   0.00     0.00   0.00   0.00
    23   1     0.04  -0.09  -0.04     0.18   0.14  -0.23     0.17   0.14  -0.22
    24   1     0.03   0.06   0.06    -0.18  -0.14   0.23    -0.18  -0.14   0.23
    25   1     0.09  -0.02  -0.01    -0.01  -0.01   0.01    -0.01   0.00   0.01
                    10                     11                     12
                     A                      B                      B
 Frequencies --   458.6547               476.9458               560.3855
 Red. masses --     3.7998                 2.9989                 5.1943
 Frc consts  --     0.4710                 0.4019                 0.9611
 IR Inten    --     2.5005                 8.2524                 5.2937
  Atom  AN      X      Y      Z        X      Y      Z        X      Y      Z
     1   6     0.07   0.15   0.06    -0.08  -0.05  -0.11    -0.03  -0.19   0.12
     2   6    -0.03  -0.01  -0.10     0.06   0.04   0.06    -0.10   0.00   0.09
     3   6     0.02  -0.01  -0.07     0.03   0.01   0.01    -0.07   0.02   0.04
     4   1    -0.14  -0.12  -0.17     0.16   0.12   0.22    -0.02   0.09   0.02
     5   6    -0.08   0.02  -0.08     0.05   0.05   0.06     0.08  -0.08   0.01
     6   1     0.13   0.20   0.15    -0.14  -0.09  -0.18    -0.01  -0.19   0.11
     7   6     0.13   0.04   0.16    -0.11  -0.11  -0.15     0.01   0.14  -0.12
     8   1    -0.08  -0.04  -0.19     0.13   0.10   0.14     0.03  -0.13   0.11
     9   6    -0.03   0.02  -0.04     0.02   0.02   0.01     0.11  -0.07  -0.05
    10   1    -0.16  -0.08  -0.19     0.16   0.14   0.21     0.02   0.10  -0.01
    11   1    -0.09  -0.01  -0.21     0.15   0.12   0.15     0.07  -0.14   0.09
    12   6     0.00   0.00   0.21    -0.02  -0.02   0.00    -0.02   0.32   0.00
    13   6    -0.13  -0.04   0.16    -0.11  -0.11   0.15     0.01   0.14   0.12
    14   1     0.00   0.14   0.21     0.13   0.09   0.20    -0.05   0.42  -0.05
    15   1     0.00  -0.14   0.21     0.13   0.09  -0.20    -0.05   0.42   0.05
    16   6     0.03  -0.02  -0.04     0.02   0.02  -0.01     0.11  -0.07   0.05
    17   6    -0.02   0.01  -0.07     0.03   0.01  -0.01    -0.07   0.02  -0.04
    18   6     0.08  -0.02  -0.08     0.05   0.05  -0.06     0.08  -0.08  -0.01
    19   1     0.09   0.01  -0.21     0.15   0.12  -0.15     0.07  -0.14  -0.09
    20   6     0.03   0.01  -0.10     0.06   0.04  -0.06    -0.10   0.00  -0.09
    21   1     0.08   0.04  -0.19     0.13   0.10  -0.14     0.03  -0.13  -0.11
    22   6    -0.07  -0.15   0.06    -0.08  -0.05   0.11    -0.03  -0.19  -0.12
    23   1     0.16   0.08  -0.19     0.16   0.14  -0.21     0.02   0.10   0.01
    24   1     0.14   0.12  -0.17     0.16   0.12  -0.22    -0.02   0.09  -0.02
    25   1    -0.13  -0.20   0.15    -0.14  -0.09   0.18    -0.01  -0.19  -0.11
                    13                     14                     15
                     A                      A                      B
 Frequencies --   618.8324               630.0577               632.3269
 Red. masses --     3.9446                 6.2659                 6.2033
 Frc consts  --     0.8900                 1.4655                 1.4614
 IR Inten    --    13.4765                 1.1261                 0.3653
  Atom  AN      X      Y      Z        X      Y      Z        X      Y      Z
     1   6    -0.08   0.06  -0.13     0.06   0.00  -0.09    -0.08   0.06   0.03
     2   6     0.08   0.04   0.02     0.18  -0.20   0.02    -0.12   0.19  -0.03
     3   6     0.08  -0.06  -0.12    -0.09  -0.12   0.12     0.14   0.09  -0.16
     4   1     0.16   0.07   0.32     0.23  -0.14   0.02    -0.19   0.11   0.06
     5   6    -0.05   0.06   0.10     0.12   0.12  -0.15    -0.16  -0.10   0.18
     6   1    -0.02   0.08  -0.10    -0.18   0.10   0.06     0.18  -0.03  -0.10
     7   6    -0.02  -0.15  -0.02    -0.08  -0.03   0.05     0.08  -0.05  -0.03
     8   1     0.15   0.07  -0.01    -0.12   0.03   0.12     0.17   0.01  -0.14
     9   6    -0.05  -0.06  -0.03    -0.14   0.18  -0.02     0.10  -0.18   0.04
    10   1     0.12   0.12   0.30     0.22   0.01  -0.06    -0.20  -0.02   0.15
    11   1     0.12   0.11  -0.01    -0.14   0.16   0.05     0.16  -0.09  -0.06
    12   6     0.00   0.00   0.23     0.00   0.00   0.09     0.04  -0.03   0.00
    13   6     0.02   0.15  -0.02     0.08   0.03   0.05     0.08  -0.05   0.03
    14   1    -0.02  -0.01   0.20     0.00  -0.03   0.08     0.11  -0.02   0.09
    15   1     0.02   0.01   0.20     0.00   0.03   0.08     0.11  -0.02  -0.09
    16   6     0.05   0.06  -0.03     0.14  -0.18  -0.02     0.10  -0.18  -0.04
    17   6    -0.08   0.06  -0.12     0.09   0.12   0.12     0.14   0.09   0.16
    18   6     0.05  -0.06   0.10    -0.12  -0.12  -0.15    -0.16  -0.10  -0.18
    19   1    -0.12  -0.11  -0.01     0.14  -0.16   0.05     0.16  -0.09   0.06
    20   6    -0.08  -0.04   0.02    -0.18   0.20   0.02    -0.12   0.19   0.03
    21   1    -0.15  -0.07  -0.01     0.12  -0.03   0.12     0.17   0.01   0.14
    22   6     0.08  -0.06  -0.13    -0.06   0.00  -0.09    -0.08   0.06  -0.03
    23   1    -0.12  -0.12   0.30    -0.22  -0.01  -0.06    -0.20  -0.02  -0.15
    24   1    -0.16  -0.07   0.32    -0.23   0.14   0.02    -0.19   0.11  -0.06
    25   1     0.02  -0.08  -0.10     0.18  -0.10   0.06     0.18  -0.03   0.10
                    16                     17                     18
                     B                      A                      B
 Frequencies --   709.8369               712.9862               747.3740
 Red. masses --     2.1610                 1.7293                 1.4959
 Frc consts  --     0.6415                 0.5179                 0.4923
 IR Inten    --    27.3162                41.3897                51.6943
  Atom  AN      X      Y      Z        X      Y      Z        X      Y      Z
     1   6     0.04   0.04   0.05    -0.03  -0.03  -0.03    -0.04  -0.03  -0.06
     2   6    -0.06  -0.06  -0.08     0.04   0.05   0.07     0.00   0.00   0.00
     3   6     0.05   0.03   0.05    -0.04  -0.01  -0.03    -0.04  -0.02  -0.04
     4   1     0.03   0.02   0.05    -0.08  -0.04  -0.11     0.21   0.18   0.27
     5   6    -0.06  -0.05  -0.08     0.06   0.04   0.06     0.00   0.00   0.01
     6   1     0.22   0.19   0.29    -0.23  -0.20  -0.29     0.20   0.15   0.24
     7   6    -0.05  -0.04  -0.06     0.04   0.04   0.04     0.05   0.04   0.06
     8   1     0.21   0.16   0.26    -0.21  -0.16  -0.25     0.07   0.07   0.10
     9   6     0.04   0.03   0.05    -0.02  -0.02  -0.04    -0.04  -0.03  -0.04
    10   1     0.03   0.03   0.04    -0.07  -0.05  -0.11     0.21   0.15   0.27
    11   1     0.21   0.16   0.25    -0.20  -0.16  -0.24     0.06   0.05   0.09
    12   6    -0.03   0.00   0.00     0.00   0.00   0.00     0.04   0.00   0.00
    13   6    -0.05  -0.04   0.06    -0.04  -0.04   0.04     0.05   0.04  -0.06
    14   1     0.01   0.03   0.05     0.01   0.03   0.01    -0.08  -0.07  -0.16
    15   1     0.01   0.03  -0.05    -0.01  -0.03   0.01    -0.08  -0.07   0.16
    16   6     0.04   0.03  -0.05     0.02   0.02  -0.04    -0.04  -0.03   0.04
    17   6     0.05   0.03  -0.05     0.04   0.01  -0.03    -0.04  -0.02   0.04
    18   6    -0.06  -0.05   0.08    -0.06  -0.04   0.06     0.00   0.00  -0.01
    19   1     0.21   0.16  -0.25     0.20   0.16  -0.24     0.06   0.05  -0.09
    20   6    -0.06  -0.06   0.08    -0.04  -0.05   0.07     0.00   0.00   0.00
    21   1     0.21   0.16  -0.26     0.21   0.16  -0.25     0.07   0.07  -0.10
    22   6     0.04   0.04  -0.05     0.03   0.03  -0.03    -0.04  -0.03   0.06
    23   1     0.03   0.03  -0.04     0.07   0.05  -0.11     0.21   0.15  -0.27
    24   1     0.03   0.02  -0.05     0.08   0.04  -0.11     0.21   0.18  -0.27
    25   1     0.22   0.19  -0.29     0.23   0.20  -0.29     0.20   0.15  -0.24
                    19                     20                     21
                     A                      A                      B
 Frequencies --   747.8496               827.0189               829.4159
 Red. masses --     2.4503                 2.9111                 4.0661
 Frc consts  --     0.8074                 1.1731                 1.6481
 IR Inten    --    20.5486                 2.4476                 0.2303
  Atom  AN      X      Y      Z        X      Y      Z        X      Y      Z
     1   6     0.04   0.10   0.01     0.04   0.00   0.09     0.00   0.07  -0.05
     2   6     0.06  -0.05  -0.02    -0.05   0.05   0.02     0.12  -0.13  -0.01
     3   6     0.10  -0.02   0.02    -0.02   0.03   0.01     0.09  -0.08  -0.03
     4   1    -0.19  -0.28  -0.20    -0.16  -0.02  -0.22     0.04  -0.25   0.12
     5   6    -0.08  -0.01   0.06     0.07   0.03  -0.07    -0.11  -0.03   0.11
     6   1    -0.16  -0.07  -0.26    -0.24  -0.19  -0.22    -0.03   0.07  -0.05
     7   6    -0.05  -0.09  -0.04    -0.09  -0.07  -0.10     0.01   0.02   0.00
     8   1    -0.02  -0.05  -0.11     0.07   0.07   0.12     0.08  -0.04  -0.03
     9   6    -0.02   0.02   0.09     0.08   0.01  -0.04    -0.10  -0.01   0.07
    10   1    -0.22  -0.26  -0.16    -0.12   0.02  -0.29    -0.04  -0.20   0.15
    11   1    -0.08  -0.01  -0.06     0.13   0.04   0.03    -0.09   0.02   0.05
    12   6     0.00   0.00  -0.10     0.00   0.00   0.24    -0.01   0.30   0.00
    13   6     0.05   0.09  -0.04     0.09   0.07  -0.10     0.01   0.02   0.00
    14   1     0.00  -0.09  -0.11    -0.02  -0.10   0.21    -0.02   0.44  -0.01
    15   1     0.00   0.09  -0.11     0.02   0.10   0.21    -0.02   0.44   0.01
    16   6     0.02  -0.02   0.09    -0.08  -0.01  -0.04    -0.10  -0.01  -0.07
    17   6    -0.10   0.02   0.02     0.02  -0.03   0.01     0.09  -0.08   0.03
    18   6     0.08   0.01   0.06    -0.07  -0.03  -0.07    -0.11  -0.03  -0.11
    19   1     0.08   0.01  -0.06    -0.13  -0.04   0.03    -0.09   0.02  -0.05
    20   6    -0.06   0.05  -0.02     0.05  -0.05   0.02     0.12  -0.13   0.01
    21   1     0.02   0.05  -0.11    -0.07  -0.07   0.12     0.08  -0.04   0.03
    22   6    -0.04  -0.10   0.01    -0.04   0.00   0.09     0.00   0.07   0.05
    23   1     0.22   0.26  -0.16     0.12  -0.02  -0.29    -0.04  -0.20  -0.15
    24   1     0.19   0.28  -0.20     0.16   0.02  -0.22     0.04  -0.25  -0.12
    25   1     0.16   0.07  -0.26     0.24   0.19  -0.22    -0.03   0.07   0.05
                    22                     23                     24
                     B                      A                      B
 Frequencies --   853.4956               854.4815               898.7918
 Red. masses --     1.2493                 1.2483                 1.4376
 Frc consts  --     0.5362                 0.5370                 0.6842
 IR Inten    --     0.0705                 0.0400                 3.8364
  Atom  AN      X      Y      Z        X      Y      Z        X      Y      Z
     1   6     0.00   0.00   0.00     0.00   0.00   0.00     0.04   0.02   0.04
     2   6    -0.03  -0.02  -0.04     0.03   0.02   0.04     0.00   0.02   0.01
     3   6    -0.03  -0.02  -0.04     0.03   0.02   0.04    -0.04  -0.01  -0.02
     4   1     0.18   0.15   0.24    -0.19  -0.15  -0.24    -0.05  -0.01  -0.10
     5   6     0.03   0.02   0.04    -0.03  -0.02  -0.04    -0.01  -0.01   0.01
     6   1    -0.01  -0.01  -0.01     0.00   0.00   0.00    -0.15  -0.17  -0.27
     7   6     0.00   0.00   0.00     0.00   0.00   0.00     0.00  -0.01  -0.02
     8   1     0.20   0.16   0.26    -0.20  -0.16  -0.25     0.15   0.15   0.23
     9   6     0.03   0.02   0.04    -0.03  -0.02  -0.04    -0.05  -0.01  -0.02
    10   1    -0.19  -0.15  -0.25     0.19   0.15   0.24    -0.02  -0.06  -0.02
    11   1    -0.20  -0.15  -0.25     0.20   0.16   0.25     0.13   0.13   0.23
    12   6     0.00   0.00   0.00     0.00   0.00   0.01     0.13   0.00   0.00
    13   6     0.00   0.00   0.00     0.00   0.00   0.00     0.00  -0.01   0.02
    14   1     0.00  -0.01  -0.01     0.00   0.00   0.01    -0.15  -0.02  -0.37
    15   1     0.00  -0.01   0.01     0.00   0.00   0.01    -0.15  -0.02   0.37
    16   6     0.03   0.02  -0.04     0.03   0.02  -0.04    -0.05  -0.01   0.02
    17   6    -0.03  -0.02   0.04    -0.03  -0.02   0.04    -0.04  -0.01   0.02
    18   6     0.03   0.02  -0.04     0.03   0.02  -0.04    -0.01  -0.01  -0.01
    19   1    -0.20  -0.15   0.25    -0.20  -0.16   0.25     0.13   0.13  -0.23
    20   6    -0.03  -0.02   0.04    -0.03  -0.02   0.04     0.00   0.02  -0.01
    21   1     0.20   0.16  -0.26     0.20   0.16  -0.25     0.15   0.15  -0.23
    22   6     0.00   0.00   0.00     0.00   0.00   0.00     0.04   0.02  -0.04
    23   1    -0.19  -0.15   0.25    -0.19  -0.15   0.24    -0.02  -0.06   0.02
    24   1     0.18   0.15  -0.24     0.19   0.15  -0.24    -0.05  -0.01   0.10
    25   1    -0.01  -0.01   0.01     0.00   0.00   0.00    -0.15  -0.17   0.27
                    25                     26                     27
                     A                      B                      B
 Frequencies --   927.3016               942.2936               973.6235
 Red. masses --     1.5079                 1.7610                 1.3634
 Frc consts  --     0.7639                 0.9213                 0.7614
 IR Inten    --     0.6049                 0.8928                 0.0760
  Atom  AN      X      Y      Z        X      Y      Z        X      Y      Z
     1   6    -0.04  -0.03  -0.04    -0.01  -0.03  -0.04    -0.01   0.00  -0.01
     2   6    -0.01   0.00  -0.01    -0.01   0.02   0.00     0.04   0.03   0.05
     3   6     0.04   0.04   0.05     0.01   0.03   0.06    -0.03  -0.03  -0.04
     4   1     0.02   0.03   0.03     0.00   0.04  -0.04    -0.21  -0.17  -0.27
     5   6     0.01   0.01  -0.01    -0.01  -0.01   0.02    -0.03  -0.03  -0.04
     6   1     0.20   0.18   0.29     0.22   0.10   0.17     0.04   0.03   0.05
     7   6    -0.04  -0.04  -0.04    -0.03  -0.04  -0.07     0.00   0.00   0.00
     8   1    -0.23  -0.18  -0.30    -0.20  -0.13  -0.21     0.18   0.14   0.23
     9   6     0.05   0.02   0.04     0.00   0.04   0.06     0.04   0.03   0.04
    10   1    -0.01   0.02  -0.04    -0.02  -0.08   0.00     0.18   0.14   0.23
    11   1    -0.19  -0.16  -0.27    -0.19  -0.11  -0.16    -0.19  -0.15  -0.24
    12   6     0.00   0.00   0.06     0.16  -0.01   0.00     0.00   0.00   0.00
    13   6     0.04   0.04  -0.04    -0.03  -0.04   0.07     0.00   0.00   0.00
    14   1    -0.01  -0.09   0.05    -0.15   0.06  -0.41     0.00   0.00   0.00
    15   1     0.01   0.09   0.05    -0.15   0.06   0.41     0.00   0.00   0.00
    16   6    -0.05  -0.02   0.04     0.00   0.04  -0.06     0.04   0.03  -0.04
    17   6    -0.04  -0.04   0.05     0.01   0.03  -0.06    -0.03  -0.03   0.04
    18   6    -0.01  -0.01  -0.01    -0.01  -0.01  -0.02    -0.03  -0.03   0.04
    19   1     0.19   0.16  -0.27    -0.19  -0.11   0.16    -0.19  -0.15   0.24
    20   6     0.01   0.00  -0.01    -0.01   0.02   0.00     0.04   0.03  -0.05
    21   1     0.23   0.18  -0.30    -0.20  -0.13   0.21     0.18   0.14  -0.23
    22   6     0.04   0.03  -0.04    -0.01  -0.03   0.04    -0.01   0.00   0.01
    23   1     0.01  -0.02  -0.04    -0.02  -0.08   0.00     0.18   0.14  -0.23
    24   1    -0.02  -0.03   0.03     0.00   0.04   0.04    -0.21  -0.17   0.27
    25   1    -0.20  -0.18   0.29     0.22   0.10  -0.17     0.04   0.03  -0.05
                    28                     29                     30
                     A                      A                      B
 Frequencies --   974.0253               995.1854               995.2447
 Red. masses --     1.3627                 1.2722                 1.2707
 Frc consts  --     0.7617                 0.7424                 0.7416
 IR Inten    --     0.0225                 0.0041                 0.2213
  Atom  AN      X      Y      Z        X      Y      Z        X      Y      Z
     1   6     0.01   0.00   0.01    -0.03  -0.03  -0.04     0.04   0.03   0.04
     2   6    -0.04  -0.03  -0.05     0.03   0.02   0.04    -0.03  -0.02  -0.04
     3   6     0.03   0.03   0.04    -0.01  -0.01  -0.02     0.01   0.01   0.02
     4   1     0.21   0.17   0.27    -0.18  -0.14  -0.23     0.18   0.15   0.23
     5   6     0.03   0.03   0.04     0.03   0.03   0.05    -0.04  -0.03  -0.04
     6   1    -0.04  -0.04  -0.05     0.22   0.17   0.28    -0.21  -0.17  -0.28
     7   6     0.00   0.00   0.00     0.00   0.00   0.00     0.00   0.00   0.00
     8   1    -0.18  -0.14  -0.23     0.09   0.07   0.11    -0.09  -0.07  -0.11
     9   6    -0.04  -0.03  -0.05    -0.02  -0.01  -0.02     0.02   0.01   0.02
    10   1    -0.18  -0.14  -0.23    -0.22  -0.18  -0.27     0.21   0.17   0.28
    11   1     0.19   0.16   0.24     0.12   0.10   0.16    -0.13  -0.10  -0.15
    12   6     0.00   0.00   0.00     0.00   0.00   0.00     0.01   0.00   0.00
    13   6     0.00   0.00   0.00     0.00   0.00   0.00     0.00   0.00   0.00
    14   1     0.00   0.01   0.01     0.00   0.01  -0.01    -0.01   0.01  -0.02
    15   1     0.00  -0.01   0.01     0.00  -0.01  -0.01    -0.01   0.01   0.02
    16   6     0.04   0.03  -0.05     0.02   0.01  -0.02     0.02   0.01  -0.02
    17   6    -0.03  -0.03   0.04     0.01   0.01  -0.02     0.01   0.01  -0.02
    18   6    -0.03  -0.03   0.04    -0.03  -0.03   0.05    -0.04  -0.03   0.04
    19   1    -0.19  -0.16   0.24    -0.12  -0.10   0.16    -0.13  -0.10   0.15
    20   6     0.04   0.03  -0.05    -0.03  -0.02   0.04    -0.03  -0.02   0.04
    21   1     0.18   0.14  -0.23    -0.09  -0.07   0.11    -0.09  -0.07   0.11
    22   6    -0.01   0.00   0.01     0.03   0.03  -0.04     0.04   0.03  -0.04
    23   1     0.18   0.14  -0.23     0.22   0.18  -0.27     0.21   0.17  -0.28
    24   1    -0.21  -0.17   0.27     0.18   0.14  -0.23     0.18   0.15  -0.23
    25   1     0.04   0.04  -0.05    -0.22  -0.17   0.28    -0.21  -0.17   0.28
                    31                     32                     33
                     A                      B                      A
 Frequencies --  1011.1756              1011.7486              1045.8073
 Red. masses --     6.2052                 6.2948                 2.2779
 Frc consts  --     3.7382                 3.7964                 1.4679
 IR Inten    --     0.0008                 1.0496                 0.9118
  Atom  AN      X      Y      Z        X      Y      Z        X      Y      Z
     1   6     0.00  -0.23   0.15     0.00   0.23  -0.15     0.00  -0.08   0.05
     2   6    -0.03   0.02   0.01     0.04  -0.03  -0.01     0.12  -0.06  -0.05
     3   6     0.21   0.05  -0.19    -0.21  -0.04   0.19    -0.04   0.05   0.00
     4   1    -0.02   0.02   0.03     0.03  -0.01  -0.03     0.23   0.09  -0.24
     5   6     0.02   0.00  -0.03    -0.04  -0.01   0.04    -0.12   0.03   0.07
     6   1    -0.01  -0.26   0.13     0.02   0.25  -0.14     0.00  -0.09   0.06
     7   6     0.00  -0.02   0.00     0.00   0.02  -0.02     0.00   0.02  -0.02
     8   1     0.22   0.02  -0.19    -0.23  -0.02   0.19    -0.14   0.26  -0.06
     9   6    -0.20   0.19   0.05     0.20  -0.19  -0.04     0.05   0.01  -0.04
    10   1     0.05   0.02   0.02    -0.04  -0.01   0.01    -0.23   0.28   0.02
    11   1    -0.26   0.15   0.02     0.22  -0.17  -0.06     0.13   0.15  -0.22
    12   6     0.00   0.00   0.02     0.02   0.02   0.00     0.00   0.00   0.03
    13   6     0.00   0.02   0.00     0.00   0.02   0.02     0.00  -0.02  -0.02
    14   1    -0.01   0.05   0.01    -0.02  -0.01  -0.05     0.00  -0.01   0.02
    15   1     0.01  -0.05   0.01    -0.02  -0.01   0.05     0.00   0.01   0.02
    16   6     0.20  -0.19   0.05     0.20  -0.19   0.04    -0.05  -0.01  -0.04
    17   6    -0.21  -0.05  -0.19    -0.21  -0.04  -0.19     0.04  -0.05   0.00
    18   6    -0.02   0.00  -0.03    -0.04  -0.01  -0.04     0.12  -0.03   0.07
    19   1     0.26  -0.15   0.02     0.22  -0.17   0.06    -0.13  -0.15  -0.22
    20   6     0.03  -0.02   0.01     0.04  -0.03   0.01    -0.12   0.06  -0.05
    21   1    -0.22  -0.02  -0.19    -0.23  -0.02  -0.19     0.14  -0.26  -0.06
    22   6     0.00   0.23   0.15     0.00   0.23   0.15     0.00   0.08   0.05
    23   1    -0.05  -0.02   0.02    -0.04  -0.01  -0.01     0.23  -0.28   0.02
    24   1     0.02  -0.02   0.03     0.03  -0.01   0.03    -0.23  -0.09  -0.24
    25   1     0.01   0.26   0.13     0.02   0.25   0.14     0.00   0.09   0.06
                    34                     35                     36
                     B                      A                      B
 Frequencies --  1046.6035              1092.3974              1101.6633
 Red. masses --     2.1793                 1.6140                 1.5427
 Frc consts  --     1.4065                 1.1348                 1.1031
 IR Inten    --     8.8461                 3.1647                11.0744
  Atom  AN      X      Y      Z        X      Y      Z        X      Y      Z
     1   6     0.00   0.09  -0.05     0.05  -0.02  -0.03    -0.05   0.02   0.03
     2   6    -0.11   0.05   0.05    -0.04   0.05   0.00     0.03  -0.05   0.00
     3   6     0.04  -0.04   0.00    -0.03  -0.05   0.06     0.02   0.06  -0.05
     4   1    -0.23  -0.11   0.25     0.04   0.18  -0.15    -0.03  -0.15   0.12
     5   6     0.11  -0.03  -0.07    -0.03  -0.02   0.04     0.03   0.02  -0.04
     6   1    -0.02   0.10  -0.05     0.33  -0.12  -0.18    -0.32   0.11   0.18
     7   6     0.00  -0.01   0.01     0.03  -0.04  -0.02    -0.03   0.01   0.00
     8   1     0.14  -0.25   0.05     0.05  -0.28   0.11    -0.10   0.31  -0.13
     9   6    -0.04  -0.02   0.04    -0.02   0.07  -0.02     0.02  -0.07   0.03
    10   1     0.23  -0.27  -0.01     0.03  -0.16   0.08    -0.04   0.17  -0.08
    11   1    -0.14  -0.17   0.22     0.08   0.23  -0.23    -0.10  -0.24   0.22
    12   6     0.00   0.03   0.00     0.00   0.00   0.01     0.05   0.00   0.00
    13   6     0.00  -0.01  -0.01    -0.03   0.04  -0.02    -0.03   0.01   0.00
    14   1     0.00   0.05   0.00     0.00   0.17   0.01    -0.02  -0.05  -0.10
    15   1     0.00   0.05   0.00     0.00  -0.17   0.01    -0.02  -0.05   0.10
    16   6    -0.04  -0.02  -0.04     0.02  -0.07  -0.02     0.02  -0.07  -0.03
    17   6     0.04  -0.04   0.00     0.03   0.05   0.06     0.02   0.06   0.05
    18   6     0.11  -0.03   0.07     0.03   0.02   0.04     0.03   0.02   0.04
    19   1    -0.14  -0.17  -0.22    -0.08  -0.23  -0.23    -0.10  -0.24  -0.22
    20   6    -0.11   0.05  -0.05     0.04  -0.05   0.00     0.03  -0.05   0.00
    21   1     0.14  -0.25  -0.05    -0.05   0.28   0.11    -0.10   0.31   0.13
    22   6     0.00   0.09   0.05    -0.05   0.02  -0.03    -0.05   0.02  -0.03
    23   1     0.23  -0.27   0.01    -0.03   0.16   0.08    -0.04   0.17   0.08
    24   1    -0.23  -0.11  -0.25    -0.04  -0.18  -0.15    -0.03  -0.15  -0.12
    25   1    -0.02   0.10   0.05    -0.33   0.12  -0.18    -0.32   0.11  -0.18
                    37                     38                     39
                     B                      A                      A
 Frequencies --  1175.7372              1176.0285              1191.3154
 Red. masses --     1.1131                 1.1158                 1.1709
 Frc consts  --     0.9066                 0.9092                 0.9791
 IR Inten    --     0.0507                 0.0161                 1.1534
  Atom  AN      X      Y      Z        X      Y      Z        X      Y      Z
     1   6    -0.04   0.01   0.02     0.04  -0.01  -0.02     0.00   0.00   0.00
     2   6     0.01   0.02  -0.02    -0.01  -0.02   0.03    -0.01   0.00   0.01
     3   6     0.01  -0.01   0.00    -0.01   0.01   0.00    -0.03   0.03   0.01
     4   1     0.15   0.21  -0.24    -0.15  -0.21   0.25     0.00   0.01  -0.01
     5   6     0.01  -0.03   0.01    -0.01   0.03  -0.01     0.01   0.00  -0.01
     6   1    -0.40   0.14   0.22     0.39  -0.14  -0.22    -0.11   0.04   0.06
     7   6     0.00  -0.01   0.00     0.00   0.00  -0.01     0.02  -0.05  -0.03
     8   1     0.05  -0.10   0.02    -0.06   0.12  -0.03    -0.14   0.24  -0.06
     9   6     0.01   0.00   0.00    -0.01   0.00   0.01    -0.01  -0.01   0.02
    10   1     0.14  -0.29   0.08    -0.13   0.28  -0.07     0.04  -0.10   0.01
    11   1     0.06   0.07  -0.09    -0.06  -0.08   0.09    -0.04  -0.04   0.03
    12   6     0.00   0.01   0.00     0.00   0.00   0.01     0.00   0.00  -0.01
    13   6     0.00  -0.01   0.00     0.00   0.00  -0.01    -0.02   0.05  -0.03
    14   1     0.00   0.01  -0.01     0.00   0.06   0.01     0.01   0.62   0.00
    15   1     0.00   0.01   0.01     0.00  -0.06   0.01    -0.01  -0.62   0.00
    16   6     0.01   0.00   0.00     0.01   0.00   0.01     0.01   0.01   0.02
    17   6     0.01  -0.01   0.00     0.01  -0.01   0.00     0.03  -0.03   0.01
    18   6     0.01  -0.03  -0.01     0.01  -0.03  -0.01    -0.01   0.00  -0.01
    19   1     0.06   0.07   0.09     0.06   0.08   0.09     0.04   0.04   0.03
    20   6     0.01   0.02   0.02     0.01   0.02   0.03     0.01   0.00   0.01
    21   1     0.05  -0.10  -0.02     0.06  -0.12  -0.03     0.14  -0.24  -0.06
    22   6    -0.04   0.01  -0.02    -0.04   0.01  -0.02     0.00   0.00   0.00
    23   1     0.14  -0.29  -0.08     0.13  -0.28  -0.07    -0.04   0.10   0.01
    24   1     0.15   0.21   0.24     0.15   0.21   0.25     0.00  -0.01  -0.01
    25   1    -0.40   0.14  -0.22    -0.39   0.14  -0.22     0.11  -0.04   0.06
                    40                     41                     42
                     B                      A                      A
 Frequencies --  1197.8392              1199.0793              1206.7582
 Red. masses --     1.1292                 1.1649                 3.0219
 Frc consts  --     0.9546                 0.9868                 2.5928
 IR Inten    --     0.3763                 1.0554                 0.0174
  Atom  AN      X      Y      Z        X      Y      Z        X      Y      Z
     1   6     0.00   0.00   0.00     0.00   0.00   0.00     0.00  -0.02   0.02
     2   6    -0.02  -0.02   0.02     0.01   0.02  -0.02    -0.04   0.07  -0.01
     3   6    -0.02   0.03  -0.01     0.01  -0.03   0.01     0.00  -0.03   0.01
     4   1    -0.14  -0.19   0.23     0.15   0.21  -0.24    -0.01   0.12  -0.07
     5   6     0.02  -0.03   0.01    -0.01   0.04  -0.01     0.05   0.03  -0.06
     6   1     0.00  -0.01   0.00    -0.01   0.01   0.00     0.03  -0.03  -0.01
     7   6     0.00  -0.01   0.01     0.01  -0.02   0.00     0.00  -0.19   0.17
     8   1    -0.15   0.32  -0.08     0.11  -0.24   0.06    -0.15   0.34  -0.05
     9   6     0.02   0.02  -0.03    -0.02  -0.03   0.03     0.01  -0.03   0.00
    10   1     0.14  -0.30   0.08    -0.15   0.33  -0.09    -0.03   0.23  -0.11
    11   1     0.15   0.21  -0.26    -0.16  -0.22   0.26     0.18   0.18  -0.23
    12   6     0.00   0.00   0.00     0.00   0.00  -0.01     0.00   0.00  -0.14
    13   6     0.00  -0.01  -0.01    -0.01   0.02   0.00     0.00   0.19   0.17
    14   1     0.00   0.02   0.00     0.01   0.12   0.00     0.00  -0.19  -0.15
    15   1     0.00   0.02   0.00    -0.01  -0.12   0.00     0.00   0.19  -0.15
    16   6     0.02   0.02   0.03     0.02   0.03   0.03    -0.01   0.03   0.00
    17   6    -0.02   0.03   0.01    -0.01   0.03   0.01     0.00   0.03   0.01
    18   6     0.02  -0.03  -0.01     0.01  -0.04  -0.01    -0.05  -0.03  -0.06
    19   1     0.15   0.21   0.26     0.16   0.22   0.26    -0.18  -0.18  -0.23
    20   6    -0.02  -0.02  -0.02    -0.01  -0.02  -0.02     0.04  -0.07  -0.01
    21   1    -0.15   0.32   0.08    -0.11   0.24   0.06     0.15  -0.34  -0.05
    22   6     0.00   0.00   0.00     0.00   0.00   0.00     0.00   0.02   0.02
    23   1     0.14  -0.30  -0.08     0.15  -0.33  -0.09     0.03  -0.23  -0.11
    24   1    -0.14  -0.19  -0.23    -0.15  -0.21  -0.24     0.01  -0.12  -0.07
    25   1     0.00  -0.01   0.00     0.01  -0.01   0.00    -0.03   0.03  -0.01
                    43                     44                     45
                     B                      B                      A
 Frequencies --  1216.2669              1295.9655              1339.3929
 Red. masses --     2.2557                 2.1932                 4.9152
 Frc consts  --     1.9661                 2.1702                 5.1953
 IR Inten    --     2.3112                 1.6603                 0.4946
  Atom  AN      X      Y      Z        X      Y      Z        X      Y      Z
     1   6     0.00   0.01  -0.01    -0.04   0.01   0.02    -0.15   0.05   0.08
     2   6     0.03  -0.05   0.01     0.03   0.04  -0.04     0.08   0.09  -0.11
     3   6     0.01   0.03  -0.02     0.04  -0.05   0.00     0.07  -0.15   0.04
     4   1    -0.04  -0.16   0.12    -0.06  -0.08   0.10    -0.05  -0.09   0.09
     5   6    -0.03  -0.03   0.05     0.04  -0.05   0.00     0.06  -0.15   0.04
     6   1    -0.01   0.01   0.00     0.04  -0.02  -0.02     0.20  -0.07  -0.11
     7   6    -0.02   0.16  -0.12    -0.13  -0.02   0.07    -0.15   0.06   0.07
     8   1     0.12  -0.23   0.03     0.06  -0.15   0.00    -0.08   0.16  -0.04
     9   6     0.00   0.03  -0.02     0.03   0.01  -0.03     0.07   0.11  -0.12
    10   1     0.05  -0.23   0.10    -0.07   0.21  -0.07    -0.05   0.10  -0.02
    11   1    -0.08  -0.07   0.10     0.12   0.13  -0.20    -0.10  -0.12   0.15
    12   6     0.00  -0.10   0.00     0.04   0.17   0.00     0.00   0.00  -0.01
    13   6    -0.02   0.16   0.12    -0.13  -0.02  -0.07     0.15  -0.06   0.07
    14   1     0.00  -0.50   0.01    -0.04  -0.51  -0.09     0.02   0.39   0.02
    15   1     0.00  -0.50  -0.01    -0.04  -0.51   0.09    -0.02  -0.39   0.02
    16   6     0.00   0.03   0.02     0.03   0.01   0.03    -0.07  -0.11  -0.12
    17   6     0.01   0.03   0.02     0.04  -0.05   0.00    -0.07   0.15   0.04
    18   6    -0.03  -0.03  -0.05     0.04  -0.05   0.00    -0.06   0.15   0.04
    19   1    -0.08  -0.07  -0.10     0.12   0.13   0.20     0.10   0.12   0.15
    20   6     0.03  -0.05  -0.01     0.03   0.04   0.04    -0.08  -0.09  -0.11
    21   1     0.12  -0.23  -0.03     0.06  -0.15   0.00     0.08  -0.16  -0.04
    22   6     0.00   0.01   0.01    -0.04   0.01  -0.02     0.15  -0.05   0.08
    23   1     0.05  -0.23  -0.10    -0.07   0.21   0.07     0.05  -0.10  -0.02
    24   1    -0.04  -0.16  -0.12    -0.06  -0.08  -0.10     0.05   0.09   0.09
    25   1    -0.01   0.01   0.00     0.04  -0.02   0.02    -0.20   0.07  -0.11
                    46                     47                     48
                     B                      A                      B
 Frequencies --  1341.1402              1353.1877              1357.0800
 Red. masses --     3.0593                 1.2705                 1.3721
 Frc consts  --     3.2421                 1.3707                 1.4888
 IR Inten    --     1.8485                 1.0305                 1.0491
  Atom  AN      X      Y      Z        X      Y      Z        X      Y      Z
     1   6     0.11  -0.04  -0.06    -0.03   0.01   0.02    -0.02   0.01   0.01
     2   6    -0.05  -0.05   0.07    -0.02  -0.01   0.02    -0.02  -0.01   0.02
     3   6    -0.05   0.12  -0.03     0.01  -0.04   0.01     0.01  -0.03   0.01
     4   1     0.00   0.01  -0.01     0.10   0.16  -0.18     0.10   0.16  -0.18
     5   6    -0.03   0.10  -0.03    -0.02   0.03   0.00    -0.01   0.03  -0.01
     6   1    -0.20   0.07   0.10     0.17  -0.06  -0.09     0.16  -0.06  -0.09
     7   6     0.06  -0.06  -0.03     0.06  -0.02  -0.03     0.05  -0.04  -0.03
     8   1     0.11  -0.24   0.05    -0.15   0.31  -0.08    -0.15   0.29  -0.08
     9   6    -0.05  -0.09   0.10     0.01   0.03  -0.03     0.01   0.02  -0.01
    10   1    -0.01   0.05  -0.02     0.10  -0.24   0.07     0.09  -0.19   0.05
    11   1     0.15   0.19  -0.25    -0.15  -0.20   0.25    -0.12  -0.16   0.19
    12   6    -0.01   0.13   0.00     0.00   0.00   0.02    -0.03   0.11   0.00
    13   6     0.06  -0.06   0.03    -0.06   0.02  -0.03     0.05  -0.04   0.03
    14   1     0.02  -0.40   0.04    -0.03  -0.23  -0.02     0.02  -0.37   0.05
    15   1     0.02  -0.40  -0.04     0.03   0.23  -0.02     0.02  -0.37  -0.05
    16   6    -0.05  -0.09  -0.10    -0.01  -0.03  -0.03     0.01   0.02   0.01
    17   6    -0.05   0.12   0.03    -0.01   0.04   0.01     0.01  -0.03  -0.01
    18   6    -0.03   0.10   0.03     0.02  -0.03   0.00    -0.01   0.03   0.01
    19   1     0.15   0.19   0.25     0.15   0.20   0.25    -0.12  -0.16  -0.19
    20   6    -0.05  -0.05  -0.07     0.02   0.01   0.02    -0.02  -0.01  -0.02
    21   1     0.11  -0.24  -0.05     0.15  -0.31  -0.08    -0.15   0.29   0.08
    22   6     0.11  -0.04   0.06     0.03  -0.01   0.02    -0.02   0.01  -0.01
    23   1    -0.01   0.05   0.02    -0.10   0.24   0.07     0.09  -0.19  -0.05
    24   1     0.00   0.01   0.01    -0.10  -0.16  -0.18     0.10   0.16   0.18
    25   1    -0.20   0.07  -0.10    -0.17   0.06  -0.09     0.16  -0.06   0.09
                    49                     50                     51
                     A                      B                      A
 Frequencies --  1470.2946              1474.2827              1483.5994
 Red. masses --     1.3456                 2.2039                 1.5888
 Frc consts  --     1.7139                 2.8223                 2.0605
 IR Inten    --     0.4330                 9.7310                12.1675
  Atom  AN      X      Y      Z        X      Y      Z        X      Y      Z
     1   6    -0.04   0.01   0.02     0.08  -0.03  -0.04     0.06  -0.03  -0.03
     2   6     0.00  -0.04   0.02     0.00   0.09  -0.05     0.00   0.06  -0.04
     3   6     0.01   0.02  -0.03    -0.03  -0.05   0.05    -0.02  -0.03   0.04
     4   1     0.08   0.05  -0.09    -0.17  -0.11   0.20    -0.12  -0.09   0.15
     5   6     0.00   0.04  -0.03     0.00  -0.08   0.05    -0.01  -0.04   0.04
     6   1     0.18  -0.07  -0.09    -0.37   0.13   0.20    -0.25   0.08   0.15
     7   6    -0.05   0.00   0.03     0.09  -0.03  -0.05     0.07  -0.03  -0.03
     8   1     0.06  -0.06   0.00    -0.12   0.14   0.01    -0.08   0.08   0.02
     9   6     0.02  -0.03   0.00    -0.03   0.06  -0.01    -0.01   0.05  -0.02
    10   1     0.08  -0.13   0.02    -0.16   0.24  -0.02    -0.09   0.11   0.00
    11   1     0.04   0.00  -0.04    -0.11  -0.02   0.11    -0.09  -0.05   0.10
    12   6     0.00   0.00  -0.08    -0.04   0.04   0.00     0.00   0.00  -0.05
    13   6     0.05   0.00   0.03     0.09  -0.03   0.05    -0.07   0.03  -0.03
    14   1     0.39   0.07   0.48     0.02  -0.13   0.07     0.32  -0.15   0.40
    15   1    -0.39  -0.07   0.48     0.02  -0.13  -0.07    -0.32   0.15   0.40
    16   6    -0.02   0.03   0.00    -0.03   0.06   0.01     0.01  -0.05  -0.02
    17   6    -0.01  -0.02  -0.03    -0.03  -0.05  -0.05     0.02   0.03   0.04
    18   6     0.00  -0.04  -0.03     0.00  -0.08  -0.05     0.01   0.04   0.04
    19   1    -0.04   0.00  -0.04    -0.11  -0.02  -0.11     0.09   0.05   0.10
    20   6     0.00   0.04   0.02     0.00   0.09   0.05     0.00  -0.06  -0.04
    21   1    -0.06   0.06   0.00    -0.12   0.14  -0.01     0.08  -0.08   0.02
    22   6     0.04  -0.01   0.02     0.08  -0.03   0.04    -0.06   0.03  -0.03
    23   1    -0.08   0.13   0.02    -0.16   0.24   0.02     0.09  -0.11   0.00
    24   1    -0.08  -0.05  -0.09    -0.17  -0.11  -0.20     0.12   0.09   0.15
    25   1    -0.18   0.07  -0.09    -0.37   0.13  -0.20     0.25  -0.08   0.15
                    52                     53                     54
                     B                      A                      B
 Frequencies --  1519.3089              1520.6029              1618.1345
 Red. masses --     2.2365                 2.1990                 5.6087
 Frc consts  --     3.0417                 2.9957                 8.6524
 IR Inten    --    24.5382                 3.4730                 2.4673
  Atom  AN      X      Y      Z        X      Y      Z        X      Y      Z
     1   6     0.00  -0.06   0.04     0.00   0.06  -0.04     0.22  -0.08  -0.12
     2   6     0.06   0.04  -0.08    -0.06  -0.04   0.07    -0.13   0.01   0.09
     3   6    -0.06   0.06   0.01     0.06  -0.06   0.00     0.12  -0.11  -0.02
     4   1    -0.12  -0.22   0.23     0.11   0.21  -0.22    -0.03   0.16  -0.08
     5   6    -0.06   0.09  -0.01     0.06  -0.10   0.01    -0.12   0.09   0.04
     6   1    -0.01  -0.07   0.05    -0.01   0.08  -0.04    -0.29   0.11   0.16
     7   6     0.00  -0.09   0.06     0.01   0.08  -0.06    -0.18   0.07   0.09
     8   1     0.09  -0.27   0.10    -0.09   0.28  -0.10    -0.03   0.20  -0.11
     9   6     0.06   0.02  -0.06    -0.06  -0.02   0.06     0.11   0.01  -0.09
    10   1     0.11  -0.31   0.10    -0.12   0.31  -0.10    -0.03  -0.14   0.11
    11   1    -0.11  -0.23   0.22     0.09   0.21  -0.21    -0.01  -0.16   0.11
    12   6     0.00   0.04   0.00     0.00   0.00   0.01     0.04  -0.03   0.00
    13   6     0.00  -0.09  -0.06    -0.01  -0.08  -0.06    -0.18   0.07  -0.09
    14   1     0.00   0.03   0.00     0.07  -0.02   0.11    -0.02   0.09  -0.07
    15   1     0.00   0.03   0.00    -0.07   0.02   0.11    -0.02   0.09   0.07
    16   6     0.06   0.02   0.06     0.06   0.02   0.06     0.11   0.01   0.09
    17   6    -0.06   0.06  -0.01    -0.06   0.06   0.00     0.12  -0.11   0.02
    18   6    -0.06   0.09   0.01    -0.06   0.10   0.01    -0.12   0.09  -0.04
    19   1    -0.11  -0.23  -0.22    -0.09  -0.21  -0.21    -0.01  -0.16  -0.11
    20   6     0.06   0.04   0.08     0.06   0.04   0.07    -0.13   0.01  -0.09
    21   1     0.09  -0.27  -0.10     0.09  -0.28  -0.10    -0.03   0.20   0.11
    22   6     0.00  -0.06  -0.04     0.00  -0.06  -0.04     0.22  -0.08   0.12
    23   1     0.11  -0.31  -0.10     0.12  -0.31  -0.10    -0.03  -0.14  -0.11
    24   1    -0.12  -0.22  -0.23    -0.11  -0.21  -0.22    -0.03   0.16   0.08
    25   1    -0.01  -0.07  -0.05     0.01  -0.08  -0.04    -0.29   0.11  -0.16
                    55                     56                     57
                     A                      B                      A
 Frequencies --  1622.6588              1637.8052              1643.0735
 Red. masses --     5.5421                 5.6233                 5.6497
 Frc consts  --     8.5977                 8.8872                 8.9864
 IR Inten    --     0.0012                14.2486                 0.8331
  Atom  AN      X      Y      Z        X      Y      Z        X      Y      Z
     1   6     0.21  -0.07  -0.12     0.01   0.08  -0.06     0.00  -0.08   0.05
     2   6    -0.12   0.00   0.10    -0.05  -0.15   0.13     0.04   0.14  -0.12
     3   6     0.11  -0.10  -0.03    -0.04   0.19  -0.08     0.05  -0.20   0.08
     4   1    -0.02   0.16  -0.09     0.13   0.10  -0.17    -0.13  -0.09   0.16
     5   6    -0.12   0.08   0.04     0.04  -0.18   0.09    -0.04   0.18  -0.08
     6   1    -0.28   0.10   0.15    -0.02   0.10  -0.05     0.00  -0.09   0.05
     7   6    -0.18   0.07   0.10     0.00  -0.12   0.08    -0.01   0.14  -0.08
     8   1    -0.01   0.18  -0.10     0.14  -0.22   0.02    -0.15   0.23  -0.03
     9   6     0.11   0.02  -0.10     0.05   0.16  -0.14    -0.05  -0.16   0.14
    10   1    -0.03  -0.13   0.10    -0.14   0.20  -0.01     0.14  -0.20   0.01
    11   1    -0.01  -0.16   0.11    -0.17  -0.13   0.21     0.16   0.13  -0.21
    12   6     0.00   0.00  -0.01     0.00   0.03   0.00     0.00   0.00   0.02
    13   6     0.18  -0.07   0.10     0.00  -0.12  -0.08     0.01  -0.14  -0.08
    14   1    -0.04   0.19  -0.06     0.00   0.03   0.00     0.02   0.03   0.04
    15   1     0.04  -0.19  -0.06     0.00   0.03   0.00    -0.02  -0.03   0.04
    16   6    -0.11  -0.02  -0.10     0.05   0.16   0.14     0.05   0.16   0.14
    17   6    -0.11   0.10  -0.03    -0.04   0.19   0.08    -0.05   0.20   0.08
    18   6     0.12  -0.08   0.04     0.04  -0.18  -0.09     0.04  -0.18  -0.08
    19   1     0.01   0.16   0.11    -0.17  -0.13  -0.21    -0.16  -0.13  -0.21
    20   6     0.12   0.00   0.10    -0.05  -0.15  -0.13    -0.04  -0.14  -0.12
    21   1     0.01  -0.18  -0.10     0.14  -0.22  -0.02     0.15  -0.23  -0.03
    22   6    -0.21   0.07  -0.12     0.01   0.08   0.06     0.00   0.08   0.05
    23   1     0.03   0.13   0.10    -0.14   0.20   0.01    -0.14   0.20   0.01
    24   1     0.02  -0.16  -0.09     0.13   0.10   0.17     0.13   0.09   0.16
    25   1     0.28  -0.10   0.15    -0.02   0.10   0.05     0.00   0.09   0.05
                    58                     59                     60
                     A                      B                      B
 Frequencies --  3016.6179              3053.0991              3150.4305
 Red. masses --     1.0592                 1.1026                 1.0863
 Frc consts  --     5.6792                 6.0555                 6.3525
 IR Inten    --    25.8638                11.5808                 7.9827
  Atom  AN      X      Y      Z        X      Y      Z        X      Y      Z
     1   6     0.00   0.00   0.00     0.00   0.00   0.00     0.00   0.01  -0.01
     2   6     0.00   0.00   0.00     0.00   0.00   0.00     0.02  -0.02   0.00
     3   6     0.00   0.00   0.00     0.00   0.00   0.00    -0.04  -0.01   0.03
     4   1     0.00   0.00   0.00     0.00   0.00   0.00    -0.24   0.22   0.05
     5   6     0.00   0.00   0.00     0.00   0.00   0.00    -0.01   0.00   0.01
     6   1     0.00   0.00   0.00     0.00   0.00   0.00     0.00  -0.14   0.09
     7   6     0.00   0.00   0.00     0.00   0.00   0.00     0.00   0.00   0.00
     8   1    -0.01   0.00   0.01    -0.01   0.00   0.01     0.42   0.09  -0.38
     9   6     0.00   0.00   0.00     0.00   0.00   0.00     0.01  -0.01   0.00
    10   1     0.00   0.00   0.00     0.00   0.00   0.00     0.10   0.02  -0.10
    11   1     0.01   0.00   0.00     0.00   0.00   0.00    -0.08   0.07   0.02
    12   6     0.00   0.00   0.07    -0.09   0.00   0.00     0.00   0.00   0.00
    13   6     0.00   0.00   0.00     0.00   0.00   0.00     0.00   0.00   0.00
    14   1     0.58   0.00  -0.41     0.56   0.00  -0.43     0.01   0.00  -0.01
    15   1    -0.58   0.00  -0.41     0.56   0.00   0.43     0.01   0.00   0.01
    16   6     0.00   0.00   0.00     0.00   0.00   0.00     0.01  -0.01   0.00
    17   6     0.00   0.00   0.00     0.00   0.00   0.00    -0.04  -0.01  -0.03
    18   6     0.00   0.00   0.00     0.00   0.00   0.00    -0.01   0.00  -0.01
    19   1    -0.01   0.00   0.00     0.00   0.00   0.00    -0.08   0.07  -0.02
    20   6     0.00   0.00   0.00     0.00   0.00   0.00     0.02  -0.02   0.00
    21   1     0.01   0.00   0.01    -0.01   0.00  -0.01     0.42   0.09   0.38
    22   6     0.00   0.00   0.00     0.00   0.00   0.00     0.00   0.01   0.01
    23   1     0.00   0.00   0.00     0.00   0.00   0.00     0.10   0.02   0.10
    24   1     0.00   0.00   0.00     0.00   0.00   0.00    -0.24   0.22  -0.05
    25   1     0.00   0.00   0.00     0.00   0.00   0.00     0.00  -0.14  -0.09
                    61                     62                     63
                     A                      A                      B
 Frequencies --  3150.4504              3155.5233              3155.7447
 Red. masses --     1.0864                 1.0865                 1.0867
 Frc consts  --     6.3531                 6.3740                 6.3762
 IR Inten    --     7.3935                 0.0338                 3.3291
  Atom  AN      X      Y      Z        X      Y      Z        X      Y      Z
     1   6     0.00  -0.01   0.01     0.00   0.01  -0.01     0.00  -0.01   0.01
     2   6    -0.02   0.02   0.00     0.00   0.00   0.00     0.00   0.00   0.00
     3   6     0.04   0.01  -0.03     0.01   0.00  -0.01    -0.02   0.00   0.01
     4   1     0.24  -0.22  -0.05     0.00   0.01   0.00    -0.01   0.01   0.00
     5   6     0.01   0.00  -0.01    -0.02   0.00   0.02     0.02   0.00  -0.02
     6   1     0.00   0.14  -0.09     0.00  -0.16   0.10     0.00   0.15  -0.10
     7   6     0.00   0.00   0.00     0.00   0.00   0.00     0.00   0.00   0.00
     8   1    -0.42  -0.09   0.39    -0.15  -0.03   0.14     0.17   0.04  -0.16
     9   6    -0.01   0.00   0.00     0.03  -0.03  -0.01    -0.03   0.03   0.01
    10   1    -0.09  -0.02   0.08     0.28   0.06  -0.26    -0.28  -0.06   0.26
    11   1     0.06  -0.05  -0.01    -0.37   0.35   0.07     0.36  -0.35  -0.07
    12   6     0.00   0.00   0.00     0.00   0.00   0.00     0.00   0.00   0.00
    13   6     0.00   0.00   0.00     0.00   0.00   0.00     0.00   0.00   0.00
    14   1    -0.01   0.00   0.01     0.00   0.00   0.00     0.01   0.00  -0.01
    15   1     0.01   0.00   0.01     0.00   0.00   0.00     0.01   0.00   0.01
    16   6     0.01   0.00   0.00    -0.03   0.03  -0.01    -0.03   0.03  -0.01
    17   6    -0.04  -0.01  -0.03    -0.01   0.00  -0.01    -0.02   0.00  -0.01
    18   6    -0.01   0.00  -0.01     0.02   0.00   0.02     0.02   0.00   0.02
    19   1    -0.06   0.05  -0.01     0.37  -0.35   0.07     0.36  -0.35   0.07
    20   6     0.02  -0.02   0.00     0.00   0.00   0.00     0.00   0.00   0.00
    21   1     0.42   0.09   0.39     0.15   0.03   0.14     0.17   0.04   0.16
    22   6     0.00   0.01   0.01     0.00  -0.01  -0.01     0.00  -0.01  -0.01
    23   1     0.09   0.02   0.08    -0.28  -0.06  -0.26    -0.28  -0.06  -0.26
    24   1    -0.24   0.22  -0.05     0.00  -0.01   0.00    -0.01   0.01   0.00
    25   1     0.00  -0.14  -0.09     0.00   0.16   0.10     0.00   0.15   0.10
                    64                     65                     66
                     B                      A                      A
 Frequencies --  3165.8903              3166.0252              3174.4765
 Red. masses --     1.0901                 1.0901                 1.0942
 Frc consts  --     6.4371                 6.4380                 6.4968
 IR Inten    --     6.7829                 6.6758                11.7401
  Atom  AN      X      Y      Z        X      Y      Z        X      Y      Z
     1   6     0.00   0.03  -0.02     0.00  -0.03   0.02     0.00   0.00   0.00
     2   6     0.02  -0.02   0.00    -0.02   0.02   0.00    -0.03   0.03   0.00
     3   6     0.02   0.00  -0.02    -0.02   0.00   0.02    -0.01   0.00   0.01
     4   1    -0.21   0.20   0.04     0.21  -0.20  -0.04     0.32  -0.30  -0.06
     5   6    -0.01   0.00   0.01     0.01   0.00  -0.01    -0.03  -0.01   0.03
     6   1     0.00  -0.38   0.24     0.00   0.38  -0.24     0.00  -0.04   0.03
     7   6     0.00   0.00   0.00     0.00   0.00   0.00     0.00   0.00   0.00
     8   1    -0.19  -0.04   0.17     0.19   0.04  -0.18     0.13   0.03  -0.12
     9   6    -0.02   0.02   0.00     0.02  -0.02   0.00    -0.02   0.02   0.00
    10   1     0.08   0.02  -0.08    -0.08  -0.02   0.08     0.32   0.07  -0.29
    11   1     0.26  -0.25  -0.05    -0.26   0.25   0.05     0.19  -0.19  -0.04
    12   6     0.00   0.00   0.00     0.00   0.00   0.00     0.00   0.00   0.00
    13   6     0.00   0.00   0.00     0.00   0.00   0.00     0.00   0.00   0.00
    14   1     0.00   0.00   0.00     0.01   0.00  -0.01     0.00   0.00   0.00
    15   1     0.00   0.00   0.00    -0.01   0.00  -0.01     0.00   0.00   0.00
    16   6    -0.02   0.02   0.00    -0.02   0.02   0.00     0.02  -0.02   0.00
    17   6     0.02   0.00   0.02     0.02   0.00   0.02     0.01   0.00   0.01
    18   6    -0.01   0.00  -0.01    -0.01   0.00  -0.01     0.03   0.01   0.03
    19   1     0.26  -0.25   0.05     0.26  -0.25   0.05    -0.19   0.19  -0.04
    20   6     0.02  -0.02   0.00     0.02  -0.02   0.00     0.03  -0.03   0.00
    21   1    -0.19  -0.04  -0.17    -0.19  -0.04  -0.18    -0.13  -0.03  -0.12
    22   6     0.00   0.03   0.02     0.00   0.03   0.02     0.00   0.00   0.00
    23   1     0.08   0.02   0.08     0.08   0.02   0.08    -0.32  -0.07  -0.29
    24   1    -0.21   0.20  -0.04    -0.21   0.20  -0.04    -0.32   0.30  -0.06
    25   1     0.00  -0.38  -0.24     0.00  -0.38  -0.24     0.00   0.04   0.03
                    67                     68                     69
                     B                      B                      A
 Frequencies --  3174.5768              3186.3979              3186.6448
 Red. masses --     1.0943                 1.0984                 1.0984
 Frc consts  --     6.4975                 6.5705                 6.5714
 IR Inten    --    51.3939                30.8325                 6.7111
  Atom  AN      X      Y      Z        X      Y      Z        X      Y      Z
     1   6     0.00   0.00   0.00     0.00   0.04  -0.02     0.00  -0.04   0.02
     2   6     0.03  -0.03   0.00    -0.02   0.02   0.01     0.02  -0.02  -0.01
     3   6     0.01   0.00  -0.01    -0.01   0.00   0.01     0.01   0.00  -0.01
     4   1    -0.31   0.30   0.06     0.24  -0.23  -0.05    -0.24   0.23   0.05
     5   6     0.03   0.01  -0.03     0.02   0.00  -0.02    -0.02   0.00   0.02
     6   1     0.00   0.04  -0.03    -0.01  -0.41   0.26     0.01   0.41  -0.26
     7   6     0.00   0.00   0.00     0.00   0.00   0.00     0.00   0.00   0.00
     8   1    -0.13  -0.03   0.12     0.08   0.02  -0.07    -0.08  -0.02   0.07
     9   6     0.02  -0.02   0.00     0.01  -0.01   0.00    -0.01   0.01   0.00
    10   1    -0.32  -0.07   0.29    -0.25  -0.05   0.23     0.25   0.05  -0.23
    11   1    -0.20   0.19   0.04    -0.10   0.10   0.02     0.10  -0.09  -0.02
    12   6     0.00   0.00   0.00     0.00   0.00   0.00     0.00   0.00   0.00
    13   6     0.00   0.00   0.00     0.00   0.00   0.00     0.00   0.00   0.00
    14   1     0.00   0.00   0.00     0.00   0.00   0.00     0.00   0.00   0.00
    15   1     0.00   0.00   0.00     0.00   0.00   0.00     0.00   0.00   0.00
    16   6     0.02  -0.02   0.00     0.01  -0.01   0.00     0.01  -0.01   0.00
    17   6     0.01   0.00   0.01    -0.01   0.00  -0.01    -0.01   0.00  -0.01
    18   6     0.03   0.01   0.03     0.02   0.00   0.02     0.02   0.00   0.02
    19   1    -0.20   0.19  -0.04    -0.10   0.10  -0.02    -0.10   0.09  -0.02
    20   6     0.03  -0.03   0.00    -0.02   0.02  -0.01    -0.02   0.02  -0.01
    21   1    -0.13  -0.03  -0.12     0.08   0.02   0.07     0.08   0.02   0.07
    22   6     0.00   0.00   0.00     0.00   0.04   0.02     0.00   0.04   0.02
    23   1    -0.32  -0.07  -0.29    -0.25  -0.05  -0.23    -0.25  -0.05  -0.23
    24   1    -0.31   0.30  -0.06     0.24  -0.23   0.05     0.24  -0.23   0.05
    25   1     0.00   0.04   0.03    -0.01  -0.41  -0.26    -0.01  -0.41  -0.26
    
    
    
    Vibrational Energies and Rotational Constants (cm-1)
 Mode(Quanta)     E(harm)     E(anharm)    Aa(z)       Ba(x)       Ca(y)
 Equilibrium Geometry                     0.068589    0.013796    0.013779
 Ground State   45708.673    45180.343    0.068485    0.013672    0.013720
 Fundamental Bands (DE w.r.t. Ground State)
  1(1)           3186.645     3053.470    0.068469    0.013672    0.013719
  2(1)           3174.477     3047.107    0.068431    0.013677    0.013719
  3(1)           3166.025     3038.504    0.068424    0.013678    0.013719
  4(1)           3155.523     3026.629    0.068376    0.013686    0.013717
  5(1)           3150.450     3010.441    0.068470    0.013671    0.013719
  6(1)           3016.618     2937.435    0.068816    0.013619    0.013712
  7(1)           1643.074     1604.219    0.068475    0.013669    0.013721
  8(1)           1622.659     1580.630    0.068344    0.013659    0.013705
  9(1)           1520.603     1488.867    0.068459    0.013671    0.013719
 10(1)           1483.599     1451.312    0.068461    0.013669    0.013716
 11(1)           1470.295     1446.740    0.068669    0.013639    0.013717
 12(1)           1353.188     1324.993    0.068485    0.013673    0.013719
 13(1)           1339.393     1297.976    0.068412    0.013665    0.013713
 14(1)           1206.758     1180.443    0.068446    0.013655    0.013702
 15(1)           1199.079     1181.395    0.068476    0.013673    0.013719
 16(1)           1191.315     1169.445    0.067965    0.013749    0.013736
 17(1)           1176.028     1161.635    0.068499    0.013672    0.013719
 18(1)           1092.397     1070.350    0.068366    0.013692    0.013720
 19(1)           1045.807     1027.777    0.068450    0.013671    0.013716
 20(1)           1011.176      997.918    0.068477    0.013671    0.013718
 21(1)            995.185      977.352    0.068451    0.013671    0.013719
 22(1)            974.025      964.271    0.068355    0.013686    0.013719
 23(1)            927.302      911.233    0.068464    0.013672    0.013719
 24(1)            854.481      839.335    0.068370    0.013690    0.013720
 25(1)            827.019      814.774    0.068672    0.013634    0.013716
 26(1)            747.850      737.272    0.068525    0.013662    0.013706
 27(1)            712.986      700.181    0.068502    0.013672    0.013720
 28(1)            630.058      623.803    0.068480    0.013674    0.013730
 29(1)            618.832      610.902    0.068438    0.013672    0.013714
 30(1)            458.655      452.966    0.068594    0.013655    0.013697
 31(1)            411.750      403.919    0.068480    0.013674    0.013721
 32(1)            287.448      282.327    0.068526    0.013672    0.013721
 33(1)            223.608      222.508    0.068603    0.013674    0.013718
 34(1)             64.221       43.476    0.068614    0.013676    0.013730
 35(1)             21.240        9.276    0.068555    0.013680    0.013728
 36(1)           3186.398     3053.255    0.068469    0.013672    0.013719
 37(1)           3174.577     3046.776    0.068434    0.013677    0.013719
 38(1)           3165.890     3038.188    0.068420    0.013679    0.013719
 39(1)           3155.745     3026.789    0.068391    0.013683    0.013717
 40(1)           3150.431     3010.107    0.068470    0.013671    0.013719
 41(1)           3053.099     2913.761    0.069006    0.013591    0.013709
 42(1)           1637.805     1598.910    0.068510    0.013672    0.013721
 43(1)           1618.135     1578.143    0.068381    0.013662    0.013705
 44(1)           1519.309     1487.927    0.068460    0.013671    0.013718
 45(1)           1474.283     1445.152    0.068456    0.013667    0.013715
 46(1)           1357.080     1327.481    0.068220    0.013709    0.013725
 47(1)           1341.140     1323.252    0.068426    0.013665    0.013714
 48(1)           1295.966     1265.325    0.068697    0.013625    0.013724
 49(1)           1216.267     1189.817    0.068363    0.013673    0.013724
 50(1)           1197.839     1181.562    0.068478    0.013673    0.013720
 51(1)           1175.737     1161.369    0.068498    0.013672    0.013719
 52(1)           1101.663     1076.456    0.068493    0.013670    0.013719
 53(1)           1046.603     1028.616    0.068440    0.013671    0.013717
 54(1)           1011.749      998.358    0.068477    0.013671    0.013718
 55(1)            995.245      977.516    0.068451    0.013671    0.013719
 56(1)            973.624      964.187    0.068455    0.013671    0.013719
 57(1)            942.294      927.171    0.068103    0.013725    0.013710
 58(1)            898.792      884.279    0.068643    0.013642    0.013713
 59(1)            853.496      838.213    0.068484    0.013672    0.013720
 60(1)            829.416      819.858    0.068245    0.013695    0.013729
 61(1)            747.374      734.224    0.068671    0.013642    0.013719
 62(1)            709.837      697.033    0.068503    0.013672    0.013720
 63(1)            632.327      625.668    0.068460    0.013674    0.013720
 64(1)            560.385      554.297    0.068475    0.013669    0.013717
 65(1)            476.946      470.305    0.068485    0.013672    0.013720
 66(1)            410.920      402.159    0.068480    0.013674    0.013721
 67(1)            337.171      335.944    0.069321    0.013537    0.013701
 68(1)            191.896      188.514    0.068331    0.013675    0.013723
 69(1)             18.140        9.032    0.068494    0.013692    0.013738
